# Supplementary material for: Rbm20 ablation is associated with changes in the expression of titin-interacting and metabolic proteins
Source: Royal Society of Chemistry journal article supplement (doi:10.1039/d2mo00115b), 2022-06-22
Supplement: d2mo00115b1.xlsx [file d2mo00115b1.xlsx]

## Sheet: All Proteins
ID #	Protein IDs	Majority protein IDs	Protein names	Gene names	Fasta headers	Sequence coverage [%]	Mol. weight [kDa]	LFQ intensity KO1	LFQ intensity KO2	LFQ intensity KO3	LFQ intensity KO4	LFQ intensity KO5	LFQ intensity KO6	LFQ intensity KO7	LFQ intensity KO8	LFQ intensity WT1	LFQ intensity WT2	LFQ intensity WT3	LFQ intensity WT4	LFQ intensity WT5	LFQ intensity WT6	LFQ intensity WT7	LFQ intensity WT8
1	A0A096MK47;A0A096MK47-2;A0A096MK47-3	A0A096MK47;A0A096MK47-2		Mlip	sp|A0A096MK47|MLIP_RAT Muscular LMNA-interacting protein OS=Rattus norvegicus OX=10116 GN=Mlip PE=1 SV=1;sp|A0A096MK47-2|MLIP_RAT Isoform 2 of Muscular LMNA-interacting protein OS=Rattus norvegicus OX=10116 GN=Mlip	46.8	86.185	1946500	2581600	2733000	1855100	2012100	1850300	2324100	1780600	2698000	3445000	2695400	2586200	3020200	3508000	2946600	2506900
2	A0A0G2JTR4	A0A0G2JTR4			sp|A0A0G2JTR4|ABR_RAT Active breakpoint cluster region-related protein OS=Rattus norvegicus OX=10116 GN=Abr PE=1 SV=2	6.5	97.692	234390	374060	446050	95274	176570	235520	0	269170	118090	413130	377810	320890	307760	246740	355190	272010
3	A0A0G2JV04	A0A0G2JV04			sp|A0A0G2JV04|GGA3_RAT ADP-ribosylation factor-binding protein GGA3 OS=Rattus norvegicus OX=10116 GN=Gga3 PE=1 SV=1	12.2	78.758	79320	162380	334310	68966	96881	69193	56847	74924	54039	132190	78731	110820	121760	102870	109930	96150
4	A0A0G2K047	A0A0G2K047			sp|A0A0G2K047|ACSS3_RAT Acyl-CoA synthetase short-chain family member 3, mitochondrial OS=Rattus norvegicus OX=10116 GN=Acss3 PE=1 SV=1	10.4	74.674	166080	150760	201010	160850	178420	173240	117250	169500	107040	226340	262410	237210	272920	124750	198570	234350
5	A0A0G2K2P5	A0A0G2K2P5			sp|A0A0G2K2P5|ZO1_RAT Tight junction protein ZO-1 OS=Rattus norvegicus OX=10116 GN=Tjp1 PE=1 SV=1	30.3	197.15	2070700	2461000	4089000	1965500	1808700	2181700	2167200	1863100	2156300	2404200	1856300	1934400	2297500	2103300	2207200	1981300
6	A0A0G2K309	A0A0G2K309			sp|A0A0G2K309|ORNT1_RAT Mitochondrial ornithine transporter 1 OS=Rattus norvegicus OX=10116 GN=Slc25a15 PE=1 SV=1	26.9	32.797	173920	173870	351340	121260	77724	91749	135180	114770	57237	188460	124400	102350	99766	108850	141940	79998
7	A0A0G2K344	A0A0G2K344			sp|A0A0G2K344|PK3CA_RAT Phosphatidylinositol 4,5-bisphosphate 3-kinase catalytic subunit alpha isoform OS=Rattus norvegicus OX=10116 GN=Pik3ca PE=1 SV=1	3.6	124.35	0	0	0	0	0	0	0	0	0	116510	0	0	0	15917	0	0
8	A0A0G2KBC9;A0A0G2KBC9-2;C0HJX3;C0HJX2	A0A0G2KBC9;A0A0G2KBC9-2			sp|A0A0G2KBC9|LRB3L_RAT Leukocyte immunoglobulin-like receptor subfamily B member 3-like OS=Rattus norvegicus OX=10116 GN=Lilrb3l PE=2 SV=1;sp|A0A0G2KBC9-2|LRB3L_RAT Isoform 2 of Leukocyte immunoglobulin-like receptor subfamily B member 3-like OS=Rattus no	3.3	84.943	770760	611640	0	761580	675660	673610	684440	1180500	204130	1883400	3778200	1465200	1972700	1179300	1619000	1530300
9	A0FKI7-2;A0FKI7;A0FKI7-3	A0FKI7-2;A0FKI7;A0FKI7-3	Acyl-CoA-binding domain-containing protein 5	Acbd5	sp|A0FKI7-2|ACBD5_RAT Isoform 2 of Acyl-CoA-binding domain-containing protein 5 OS=Rattus norvegicus OX=10116 GN=Acbd5;sp|A0FKI7|ACBD5_RAT Acyl-CoA-binding domain-containing protein 5 OS=Rattus norvegicus OX=10116 GN=Acbd5 PE=1 SV=1;sp|A0FKI7-3|ACBD5_RAT I	6.6	52.488	0	0	0	0	0	0	0	0	0	0	0	43304	0	0	0	0
10	A0JPJ7	A0JPJ7	Obg-like ATPase 1	Ola1	sp|A0JPJ7|OLA1_RAT Obg-like ATPase 1 OS=Rattus norvegicus OX=10116 GN=Ola1 PE=2 SV=1	53.5	44.535	1065200	1093400	1265500	1090400	929870	1071800	1206200	926420	1192700	1072000	1119900	1023600	1101200	1004300	1074000	1039200
11	A0JPM9	A0JPM9	Eukaryotic translation initiation factor 3 subunit J	Eif3j	sp|A0JPM9|EIF3J_RAT Eukaryotic translation initiation factor 3 subunit J OS=Rattus norvegicus OX=10116 GN=Eif3j PE=1 SV=1	52.1	29.187	2255300	2988200	4092800	2259900	2126200	2341000	2279600	2428300	1815700	3360000	2626500	2170700	1854400	2652500	2183500	2174300
12	A0JPQ4	A0JPQ4	Tripartite motif-containing protein 72	Trim72	sp|A0JPQ4|TRI72_RAT Tripartite motif-containing protein 72 OS=Rattus norvegicus OX=10116 GN=Trim72 PE=1 SV=1	79.9	52.831	13485000	14411000	9214400	14072000	13652000	13223000	11201000	13302000	12946000	9362000	10209000	7770000	8354900	8986000	10083000	9056900
13	A0JPQ7	A0JPQ7	Uncharacterized protein C19orf47 homolog		sp|A0JPQ7|CS047_RAT Uncharacterized protein C19orf47 homolog OS=Rattus norvegicus OX=10116 PE=2 SV=1	9.3	43.113	0	0	98009	0	0	0	0	23007	33147	38138	0	0	18498	44495	0	0
14	A0JPQ9	A0JPQ9	Chitinase domain-containing protein 1	Chid1	sp|A0JPQ9|CHID1_RAT Chitinase domain-containing protein 1 OS=Rattus norvegicus OX=10116 GN=Chid1 PE=2 SV=2	8.9	44.874	44130	163150	0	153950	95649	114560	122320	121400	207280	276220	165990	82106	126160	136880	192970	79806
15	A1A5P0	A1A5P0	Cdc42 effector protein 1	Cdc42ep1	sp|A1A5P0|BORG5_RAT Cdc42 effector protein 1 OS=Rattus norvegicus OX=10116 GN=Cdc42ep1 PE=1 SV=1	29.4	41.028	365640	370090	879930	349650	321440	305010	327710	278910	291790	332110	324470	314670	339680	308750	318410	270770
16	A1A5P2	A1A5P2	Ribosome biogenesis regulatory protein homolog	Rrs1	sp|A1A5P2|RRS1_RAT Ribosome biogenesis regulatory protein homolog OS=Rattus norvegicus OX=10116 GN=Rrs1 PE=2 SV=1	7.9	41.536	0	108400	180120	81913	0	73396	0	0	0	0	0	96979	0	0	0	97777
17	A1A5Q0	A1A5Q0	Leiomodin-2	Lmod2	sp|A1A5Q0|LMOD2_RAT Leiomodin-2 OS=Rattus norvegicus OX=10116 GN=Lmod2 PE=1 SV=1	48.8	61.717	1617700	2049500	1924900	1566100	1778400	1751400	1643500	1387400	1498900	1780300	1382000	1238200	1335200	1572500	1503100	1138100
18	A1A5R1	A1A5R1	RNA binding protein fox-1 homolog 2	Rbfox2	sp|A1A5R1|RFOX2_RAT RNA binding protein fox-1 homolog 2 OS=Rattus norvegicus OX=10116 GN=Rbfox2 PE=2 SV=1	19.2	45.55	179150	239690	398990	179740	161870	168320	199770	138130	174340	218700	197900	172640	225310	242920	193460	204140
19	A1A5S1	A1A5S1	Pre-mRNA-processing factor 6	Prpf6	sp|A1A5S1|PRP6_RAT Pre-mRNA-processing factor 6 OS=Rattus norvegicus OX=10116 GN=Prpf6 PE=1 SV=1	7.3	106.76	497180	678910	912080	520700	354570	581540	506530	381830	484430	775280	678460	534330	624110	265820	658060	477490
20	A1IGU3	A1IGU3	Rho guanine nucleotide exchange factor 37	Arhgef37	sp|A1IGU3|ARH37_RAT Rho guanine nucleotide exchange factor 37 OS=Rattus norvegicus OX=10116 GN=Arhgef37 PE=2 SV=1	2.4	76.406	0	0	0	0	0	0	0	0	0	0	0	0	11825	0	0	0
21	A1L108-2;A1L108	A1L108-2;A1L108	Actin-related protein 2/3 complex subunit 5-like protein	Arpc5l	sp|A1L108-2|ARP5L_RAT Isoform 2 of Actin-related protein 2/3 complex subunit 5-like protein OS=Rattus norvegicus OX=10116 GN=Arpc5l;sp|A1L108|ARP5L_RAT Actin-related protein 2/3 complex subunit 5-like protein OS=Rattus norvegicus OX=10116 GN=Arpc5l PE=1 SV	58.4	11.235	354830	422960	0	349560	283040	362990	380140	376010	383000	506200	425500	344400	393570	439640	385050	337880
22	A1L1J9	A1L1J9	Lipase maturation factor 2	Lmf2	sp|A1L1J9|LMF2_RAT Lipase maturation factor 2 OS=Rattus norvegicus OX=10116 GN=Lmf2 PE=2 SV=1	3	80.253	47665	55237	34487	0	0	40172	0	0	57409	98936	54265	0	57043	110650	75876	50917
23	A1L1K3	A1L1K3	Anaphase-promoting complex subunit 5	Anapc5	sp|A1L1K3|APC5_RAT Anaphase-promoting complex subunit 5 OS=Rattus norvegicus OX=10116 GN=Anapc5 PE=2 SV=1	8.3	81.738	0	0	0	0	0	0	0	0	0	0	0	0	0	0	0	24123
24	A1L1K4	A1L1K4	CDC42 small effector protein 2	Cdc42se2	sp|A1L1K4|C42S2_RAT CDC42 small effector protein 2 OS=Rattus norvegicus OX=10116 GN=Cdc42se2 PE=3 SV=2	22.9	9.0952	0	0	0	0	0	0	0	0	0	0	0	0	0	0	74829	0
25	A1L1K8	A1L1K8		Habp4	sp|A1L1K8|HABP4_RAT Intracellular hyaluronan-binding protein 4 OS=Rattus norvegicus OX=10116 GN=Habp4 PE=1 SV=1	23.6	45.826	155640	181810	587900	144860	177730	184820	65763	102290	103440	64786	100330	62509	29442	87786	100400	94781
26	A1L1L2	A1L1L2	Transmembrane protein 214	Tmem214	sp|A1L1L2|TM214_RAT Transmembrane protein 214 OS=Rattus norvegicus OX=10116 GN=Tmem214 PE=2 SV=1	4.1	76.565	0	0	0	0	29215	57400	60532	0	61435	0	58948	0	127590	58081	56765	58041
27	A2RRU1;P17625	A2RRU1	Glycogen [starch] synthase, muscle	Gys1	sp|A2RRU1|GYS1_RAT Glycogen [starch] synthase, muscle OS=Rattus norvegicus OX=10116 GN=Gys1 PE=1 SV=1	44.4	84.071	2951600	3530700	3147100	2823000	3516400	3317600	3349000	2556900	3556100	2927100	2834300	2352200	2293800	2940000	2573400	2535300
28	A2RUW1	A2RUW1	Toll-interacting protein	Tollip	sp|A2RUW1|TOLIP_RAT Toll-interacting protein OS=Rattus norvegicus OX=10116 GN=Tollip PE=1 SV=1	46.4	30.314	245980	389760	224430	274160	268280	344390	319710	230730	248500	599990	340510	301110	303280	396330	389240	337370
29	A2VCX1	A2VCX1	TIP41-like protein	Tiprl	sp|A2VCX1|TIPRL_RAT TIP41-like protein OS=Rattus norvegicus OX=10116 GN=Tiprl PE=1 SV=1	42.4	31.224	210600	122140	118930	218410	299580	229540	0	322080	291640	445810	314330	299810	380610	164580	287830	355880
30	A2VD12	A2VD12	Pre-B-cell leukemia transcription factor-interacting protein 1	Pbxip1	sp|A2VD12|PBIP1_RAT Pre-B-cell leukemia transcription factor-interacting protein 1 OS=Rattus norvegicus OX=10116 GN=Pbxip1 PE=1 SV=1	46.4	80.275	954050	1311800	1127000	1131200	764740	1161500	1039200	1010100	1149400	2207000	1416700	1111000	1238600	1281700	1367100	1108500
31	A2VD13	A2VD13	Pentatricopeptide repeat-containing protein 1, mitochondrial	Ptcd1	sp|A2VD13|PTCD1_RAT Pentatricopeptide repeat-containing protein 1, mitochondrial OS=Rattus norvegicus OX=10116 GN=Ptcd1 PE=2 SV=1	2.2	77.12	0	0	0	0	0	485570	371370	389360	300540	0	0	0	0	0	455630	0
32	A4L9P7	A4L9P7	Sister chromatid cohesion protein PDS5 homolog A	Pds5a	sp|A4L9P7|PDS5A_RAT Sister chromatid cohesion protein PDS5 homolog A OS=Rattus norvegicus OX=10116 GN=Pds5a PE=1 SV=1	7.6	150.28	146720	115890	263670	112970	111950	110520	107860	113700	75944	141920	171740	131750	158780	106540	188100	0
33	A6ZIQ8	A6ZIQ8	Trimeric intracellular cation channel type A	Tmem38a	sp|A6ZIQ8|TM38A_RAT Trimeric intracellular cation channel type A OS=Rattus norvegicus OX=10116 GN=Tmem38a PE=2 SV=1	20.9	33.276	503770	638510	470990	509130	423310	536100	398910	447620	517630	671450	442770	481960	405320	899240	557060	465280
34	A7VJC2;A7VJC2-2	A7VJC2;A7VJC2-2	Heterogeneous nuclear ribonucleoproteins A2/B1	Hnrnpa2b1	sp|A7VJC2|ROA2_RAT Heterogeneous nuclear ribonucleoproteins A2/B1 OS=Rattus norvegicus OX=10116 GN=Hnrnpa2b1 PE=1 SV=1;sp|A7VJC2-2|ROA2_RAT Isoform A2 of Heterogeneous nuclear ribonucleoproteins A2/B1 OS=Rattus norvegicus OX=10116 GN=Hnrnpa2b1	69.4	37.477	8703300	8528900	6286600	8718400	7366600	8393400	8100000	7900100	8806300	13322000	10064000	9911000	10607000	9708800	10733000	9695100
35	A7VJC2-4;A7VJC2-3	A7VJC2-4;A7VJC2-3	Heterogeneous nuclear ribonucleoproteins A2/B1	Hnrnpa2b1	sp|A7VJC2-4|ROA2_RAT Isoform B1b of Heterogeneous nuclear ribonucleoproteins A2/B1 OS=Rattus norvegicus OX=10116 GN=Hnrnpa2b1;sp|A7VJC2-3|ROA2_RAT Isoform A2b of Heterogeneous nuclear ribonucleoproteins A2/B1 OS=Rattus norvegicus OX=10116 GN=Hnrnpa2b1	81.8	33.959	0	0	0	0	0	0	0	0	0	0	0	0	0	0	0	25039
36	A8WCF8	A8WCF8	Tumor protein p63-regulated gene 1-like protein	Tprg1l	sp|A8WCF8|TPRGL_RAT Tumor protein p63-regulated gene 1-like protein OS=Rattus norvegicus OX=10116 GN=Tprg1l PE=1 SV=1	28.9	29.844	0	0	201210	147360	172100	151060	134100	118290	144110	0	128360	0	0	0	0	0
37	A9UMV8;Q4FZT6;P0C170;P0C169;Q64598;Q00728	A9UMV8;Q4FZT6;P0C170;P0C169;Q64598;Q00728	Histone H2A.J;Histone H2A type 3;Histone H2A type 1-E;Histone H2A type 1-C;Histone H2A type 1-F;Histone H2A type 4	H2afj	sp|A9UMV8|H2AJ_RAT Histone H2A.J OS=Rattus norvegicus OX=10116 GN=H2aj PE=2 SV=1;sp|Q4FZT6|H2A3_RAT Histone H2A type 3 OS=Rattus norvegicus OX=10116 PE=2 SV=3;sp|P0C170|H2A1E_RAT Histone H2A type 1-E OS=Rattus norvegicus OX=10116 PE=1 SV=2;sp|P0C169|H2A1C_	58.9	14.045	4745100	4845700	2369800	4992300	6879100	5912900	4706100	4945300	2849700	3652100	3886200	6194900	5658200	4606400	2495000	5000600
38	B0BN18	B0BN18	Prefoldin subunit 2	Pfdn2	sp|B0BN18|PFD2_RAT Prefoldin subunit 2 OS=Rattus norvegicus OX=10116 GN=Pfdn2 PE=2 SV=1	42.2	16.58	305750	724270	334740	473270	318880	490360	376650	218250	452950	637780	457750	340030	429180	427780	586630	328950
39	B0BN56	B0BN56	28S ribosomal protein S31, mitochondrial	Mrps31	sp|B0BN56|RT31_RAT 28S ribosomal protein S31, mitochondrial OS=Rattus norvegicus OX=10116 GN=Mrps31 PE=2 SV=1	43.7	43.961	1091000	1280000	1239300	963650	1032300	1158900	1059500	1097600	1202100	1968800	1800900	1335800	1331700	1821700	1515800	1270000
40	B0BN85	B0BN85	Suppressor of G2 allele of SKP1 homolog	Sugt1	sp|B0BN85|SGT1_RAT Protein SGT1 homolog OS=Rattus norvegicus OX=10116 GN=Sugt1 PE=2 SV=1	45.8	38.09	499540	618690	983330	503740	500120	546830	509140	626470	478890	661270	667690	543050	697640	549080	637830	537080
41	B0BN86	B0BN86	Transmembrane protein 11, mitochondrial	Tmem11	sp|B0BN86|TMM11_RAT Transmembrane protein 11, mitochondrial OS=Rattus norvegicus OX=10116 GN=Tmem11 PE=2 SV=1	22.6	21.341	482030	670280	798810	540720	529120	611670	664270	346670	602350	541890	421900	567230	441210	806950	676350	474550
42	B0BN93	B0BN93	26S proteasome non-ATPase regulatory subunit 13	Psmd13	sp|B0BN93|PSD13_RAT 26S proteasome non-ATPase regulatory subunit 13 OS=Rattus norvegicus OX=10116 GN=Psmd13 PE=1 SV=1	60.1	42.817	765140	753310	1185800	700110	580490	612600	633760	620030	791860	1013800	889720	629210	819030	792190	804060	646830
43	B0BNA5	B0BNA5	Coactosin-like protein	Cotl1	sp|B0BNA5|COTL1_RAT Coactosin-like protein OS=Rattus norvegicus OX=10116 GN=Cotl1 PE=1 SV=1	5.6	15.932	0	0	0	0	0	0	0	0	0	0	0	0	0	0	0	15435
44	B0BNA7	B0BNA7	Eukaryotic translation initiation factor 3 subunit I	Eif3i	sp|B0BNA7|EIF3I_RAT Eukaryotic translation initiation factor 3 subunit I OS=Rattus norvegicus OX=10116 GN=Eif3i PE=2 SV=1	52.9	36.46	647100	793570	806290	631070	620100	602090	555440	555850	671360	859440	588000	578300	612890	685530	867430	653150
45	B0BNC9	B0BNC9	Quinone oxidoreductase-like protein 2		sp|B0BNC9|QORL2_RAT Quinone oxidoreductase-like protein 2 OS=Rattus norvegicus OX=10116 PE=2 SV=1	25.4	37.548	119700	126830	12293	121460	100010	87143	142390	182210	102730	134550	106080	134760	71291	124310	127480	137440
46	B0BNE2	B0BNE2	DNA-directed RNA polymerases I, II, and III subunit RPABC1	Polr2e	sp|B0BNE2|RPAB1_RAT DNA-directed RNA polymerases I, II, and III subunit RPABC1 OS=Rattus norvegicus OX=10116 GN=Polr2e PE=2 SV=1	23.3	24.57	89545	0	94272	86388	0	69544	79521	85787	63961	95417	124550	100150	140530	56906	111190	75580
47	B0BNE5	B0BNE5	S-formylglutathione hydrolase	Esd	sp|B0BNE5|ESTD_RAT S-formylglutathione hydrolase OS=Rattus norvegicus OX=10116 GN=Esd PE=2 SV=1	58.5	31.363	2501500	4156900	2414800	2614400	1964100	2613400	2673600	2589700	2297500	3447200	2387400	1757800	2044700	2501400	2555100	2027600
48	B0BNF1	B0BNF1	Septin-8	2021-09-08	sp|B0BNF1|SEPT8_RAT Septin-8 OS=Rattus norvegicus OX=10116 GN=Septin8 PE=1 SV=1	21.3	51.251	394180	534590	605830	491100	395250	504740	572170	483030	459980	677410	495090	395560	516060	609980	512400	384780
49	B0BNG0	B0BNG0	ER membrane protein complex subunit 2	Emc2	sp|B0BNG0|EMC2_RAT ER membrane protein complex subunit 2 OS=Rattus norvegicus OX=10116 GN=Emc2 PE=2 SV=1	29.6	34.869	402690	637770	871920	402490	437440	361230	388500	396310	527260	900860	504610	520150	453620	887620	495770	430890
50	B0BNM1	B0BNM1	NAD(P)H-hydrate epimerase	Apoa1bp	sp|B0BNM1|NNRE_RAT NAD(P)H-hydrate epimerase OS=Rattus norvegicus OX=10116 GN=Naxe PE=2 SV=1	35.8	30.89	856480	1202000	2045300	817630	867860	947020	842730	903570	1087200	1195700	936230	674210	901450	910560	1234000	757080
51	B0BNM9	B0BNM9	Glycolipid transfer protein	GLTP	sp|B0BNM9|GLTP_RAT Glycolipid transfer protein OS=Rattus norvegicus OX=10116 GN=GLTP PE=2 SV=1	7.2	23.703	0	0	0	0	0	0	0	0	0	0	0	0	0	0	111030	0
52	B0BNN3	B0BNN3	Carbonic anhydrase 1	Ca1	sp|B0BNN3|CAH1_RAT Carbonic anhydrase 1 OS=Rattus norvegicus OX=10116 GN=Ca1 PE=1 SV=1	67.4	28.299	1686100	1955200	2725500	1640800	1384000	1616900	1763600	1437400	2316200	1981600	1598300	1547500	1678700	1842700	1265700	1697500
53	B0K019	B0K019	BAG family molecular chaperone regulator 1	Bag1	sp|B0K019|BAG1_RAT BAG family molecular chaperone regulator 1 OS=Rattus norvegicus OX=10116 GN=Bag1 PE=2 SV=1	20.1	40.159	0	0	0	0	0	112470	0	0	0	0	0	0	116000	0	171320	113390
54	B0K020	B0K020	CDGSH iron-sulfur domain-containing protein 1	Cisd1	sp|B0K020|CISD1_RAT CDGSH iron-sulfur domain-containing protein 1 OS=Rattus norvegicus OX=10116 GN=Cisd1 PE=3 SV=1	57.4	12.097	3918500	4911600	5364500	4230100	3872000	4411900	3695700	3696100	4593500	5518100	4551700	4027800	4135600	5582600	5269300	3875000
55	B0K025	B0K025	Oligosaccharyltransferase complex subunit OSTC	Ostc	sp|B0K025|OSTC_RAT Oligosaccharyltransferase complex subunit OSTC OS=Rattus norvegicus OX=10116 GN=Ostc PE=2 SV=1	8.1	16.815	0	0	0	0	0	0	0	0	0	0	0	0	0	0	0	96832
56	B0LPN4-2;B0LPN4	B0LPN4-2;B0LPN4	Ryanodine receptor 2	Ryr2	sp|B0LPN4-2|RYR2_RAT Isoform 2 of Ryanodine receptor 2 OS=Rattus norvegicus OX=10116 GN=Ryr2;sp|B0LPN4|RYR2_RAT Ryanodine receptor 2 OS=Rattus norvegicus OX=10116 GN=Ryr2 PE=1 SV=2	47.1	562.33	15749000	15432000	14448000	16209000	14412000	16525000	14448000	13911000	22039000	27252000	24042000	23493000	22179000	23258000	23594000	22202000
57	B0LT89	B0LT89	Serine/threonine-protein kinase 24;Serine/threonine-protein kinase 24 35 kDa subunit;Serine/threonine-protein kinase 24 12 kDa subunit	Stk24	sp|B0LT89|STK24_RAT Serine/threonine-protein kinase 24 OS=Rattus norvegicus OX=10116 GN=Stk24 PE=2 SV=1	27.6	47.989	230160	235670	218270	181810	192220	192540	210770	288570	309360	358400	240300	195600	262600	319540	249700	250890
58	B1H222	B1H222	RAB6-interacting golgin	Gorab	sp|B1H222|GORAB_RAT RAB6-interacting golgin OS=Rattus norvegicus OX=10116 GN=Gorab PE=2 SV=2	22.8	41.631	0	523040	256660	0	0	422220	0	0	0	429020	257890	0	0	305240	232120	0
59	B1H267	B1H267	Sorting nexin-5	Snx5	sp|B1H267|SNX5_RAT Sorting nexin-5 OS=Rattus norvegicus OX=10116 GN=Snx5 PE=1 SV=1	34.7	46.793	572910	783060	812440	612130	545450	599970	656920	673380	680450	941930	845380	627040	715080	893280	845920	634340
60	B1PRL5	B1PRL5	Muscle-related coiled-coil protein	Murc	sp|B1PRL5|CAVN4_RAT Caveolae-associated protein 4 OS=Rattus norvegicus OX=10116 GN=Cavin4 PE=1 SV=1	49.2	41.093	4234800	5656700	8550100	4259700	4450100	4400400	4395000	4555600	4481000	5137700	4446100	3616700	4181200	5225700	4555300	3564300
61	B1WBW4	B1WBW4	Armadillo repeat-containing protein 10	Armc10	sp|B1WBW4|ARM10_RAT Armadillo repeat-containing protein 10 OS=Rattus norvegicus OX=10116 GN=Armc10 PE=1 SV=1	40.8	33.421	823100	1131000	1124100	929470	848750	864230	898110	846080	773890	1228300	1052500	1084300	897550	1241400	1142000	902280
62	B1WC37	B1WC37	Mitochondrial tRNA-specific 2-thiouridylase 1	Trmu	sp|B1WC37|MTU1_RAT Mitochondrial tRNA-specific 2-thiouridylase 1 OS=Rattus norvegicus OX=10116 GN=Trmu PE=2 SV=1	6.3	49.723	52519	0	190760	0	0	0	0	0	0	74136	0	0	0	83791	0	0
63	B1WC40	B1WC40	Nuclear cap-binding protein subunit 2	Ncbp2	sp|B1WC40|NCBP2_RAT Nuclear cap-binding protein subunit 2 OS=Rattus norvegicus OX=10116 GN=Ncbp2 PE=1 SV=1	7.1	18.017	0	0	0	0	0	0	0	0	0	0	0	0	0	0	0	28246
64	B1WC61	B1WC61		Acad9	sp|B1WC61|ACAD9_RAT Complex I assembly factor ACAD9, mitochondrial OS=Rattus norvegicus OX=10116 GN=Acad9 PE=1 SV=1	68.2	68.842	8111100	9813200	7778800	8491600	7555500	8360700	7862700	7581700	8235000	10362000	9717200	9080800	8719200	9768100	10182000	8937500
65	B2GUV7	B2GUV7	Eukaryotic translation initiation factor 5B	Eif5b	sp|B2GUV7|IF2P_RAT Eukaryotic translation initiation factor 5B OS=Rattus norvegicus OX=10116 GN=Eif5b PE=1 SV=1	9.5	137.68	279050	248440	223670	216670	215030	251380	205280	219170	228020	267160	219340	236510	288040	298490	308630	254490
66	B2GUZ1	B2GUZ1	Ubiquitin carboxyl-terminal hydrolase 4	Usp4	sp|B2GUZ1|UBP4_RAT Ubiquitin carboxyl-terminal hydrolase 4 OS=Rattus norvegicus OX=10116 GN=Usp4 PE=1 SV=1	8.3	108.37	95667	54607	0	113360	83134	118000	169330	108510	144450	203030	122870	94020	161280	174450	160690	96715
67	B2GUZ5	B2GUZ5	F-actin-capping protein subunit alpha-1	Capza1	sp|B2GUZ5|CAZA1_RAT F-actin-capping protein subunit alpha-1 OS=Rattus norvegicus OX=10116 GN=Capza1 PE=1 SV=1	61.9	32.909	1262800	1359300	1772000	1238800	1140000	1284100	1353200	1104200	1267800	1303600	1180100	1118300	1259200	1200800	1470100	1151400
68	B2GV05	B2GV05	RNA-binding protein 5	Rbm5	sp|B2GV05|RBM5_RAT RNA-binding protein 5 OS=Rattus norvegicus OX=10116 GN=Rbm5 PE=1 SV=1	5.5	92.351	0	371250	0	0	270320	276850	381360	300940	332030	428770	359220	522440	687010	370340	0	0
69	B2GV06	B2GV06	Succinyl-CoA:3-ketoacid coenzyme A transferase 1, mitochondrial	Oxct1	sp|B2GV06|SCOT1_RAT Succinyl-CoA:3-ketoacid coenzyme A transferase 1, mitochondrial OS=Rattus norvegicus OX=10116 GN=Oxct1 PE=1 SV=1	68.3	56.203	47709000	52902000	49028000	44087000	50411000	42893000	48796000	49677000	43431000	19749000	21492000	16974000	16992000	25081000	17525000	22067000
70	B2GV24	B2GV24	E3 UFM1-protein ligase 1	Ufl1	sp|B2GV24|UFL1_RAT E3 UFM1-protein ligase 1 OS=Rattus norvegicus OX=10116 GN=Ufl1 PE=1 SV=1	19.8	89.584	484490	615190	687200	477160	363320	423520	487650	429110	564360	856040	652390	532930	602110	707380	645700	507150
71	B2GV38	B2GV38	Ubiquitin-like protein 4A	Ubl4a	sp|B2GV38|UBL4A_RAT Ubiquitin-like protein 4A OS=Rattus norvegicus OX=10116 GN=Ubl4a PE=2 SV=1	64.3	17.79	277240	455450	614570	253210	274430	277950	298290	295360	305640	501970	392210	308140	331130	448350	404080	302720
72	B2GV54	B2GV54	Neutral cholesterol ester hydrolase 1	Nceh1	sp|B2GV54|NCEH1_RAT Neutral cholesterol ester hydrolase 1 OS=Rattus norvegicus OX=10116 GN=Nceh1 PE=1 SV=1	46.8	45.821	2454900	3032500	2955800	2454700	2270900	2580900	2814300	1887700	3125500	3995100	2842800	2645600	2857200	3631900	3755200	2474300
73	B2GV71	B2GV71	NADH dehydrogenase [ubiquinone] 1 alpha subcomplex assembly factor 5	Ndufaf5	sp|B2GV71|NDUF5_RAT Arginine-hydroxylase NDUFAF5, mitochondrial OS=Rattus norvegicus OX=10116 GN=Ndufaf5 PE=2 SV=1	13.7	38.229	122930	139150	88371	121490	115640	117280	125870	99949	108310	141350	123430	113810	138540	112680	125150	103700
74	B2RYF7	B2RYF7	WAS protein family homolog 1	Wash1	sp|B2RYF7|WASH1_RAT WASH complex subunit 1 OS=Rattus norvegicus OX=10116 GN=Washc1 PE=2 SV=1	2.7	51.326	0	0	0	0	0	0	0	0	0	0	0	0	0	0	0	46699
75	B2RYG6	B2RYG6	Ubiquitin thioesterase OTUB1	Otub1	sp|B2RYG6|OTUB1_RAT Ubiquitin thioesterase OTUB1 OS=Rattus norvegicus OX=10116 GN=Otub1 PE=1 SV=1	55.7	31.27	738530	871940	1141700	768470	595970	807800	823600	741840	664530	1186100	796290	674830	886880	612040	846190	652620
76	B2RYJ4	B2RYJ4	L-aminoadipate-semialdehyde dehydrogenase-phosphopantetheinyl transferase	Aasdhppt	sp|B2RYJ4|ADPPT_RAT L-aminoadipate-semialdehyde dehydrogenase-phosphopantetheinyl transferase OS=Rattus norvegicus OX=10116 GN=Aasdhppt PE=2 SV=1	10.4	35.816	0	0	0	0	0	0	0	0	0	164130	0	0	0	0	0	0
77	B2RYM5	B2RYM5	Lys-63-specific deubiquitinase BRCC36	Brcc3	sp|B2RYM5|BRCC3_RAT Lys-63-specific deubiquitinase BRCC36 OS=Rattus norvegicus OX=10116 GN=Brcc3 PE=2 SV=1	24.7	33.015	87577	143680	172590	109490	100990	130090	74016	51193	146400	84157	99905	109460	127850	243350	123430	130220
78	B2RYT9	B2RYT9	Translational activator of cytochrome c oxidase 1	Taco1	sp|B2RYT9|TACO1_RAT Translational activator of cytochrome c oxidase 1 OS=Rattus norvegicus OX=10116 GN=Taco1 PE=2 SV=1	44.7	32.754	592420	899170	754990	645690	676670	660200	565730	739750	646150	825110	556250	463400	552610	798860	599750	502160
79	B2RYU8	B2RYU8	LYR motif-containing protein 1	Lyrm1	sp|B2RYU8|LYRM1_RAT LYR motif-containing protein 1 OS=Rattus norvegicus OX=10116 GN=Lyrm1 PE=2 SV=1	13.1	14.258	63960	59605	213520	66878	58819	59988	52250	42840	71398	28998	48512	44013	47780	0	43682	49489
80	B2RYW8	B2RYW8	MICOS complex subunit Mic10	Minos1	sp|B2RYW8|MIC10_RAT MICOS complex subunit Mic10 OS=Rattus norvegicus OX=10116 GN=Micos10 PE=3 SV=1	25	8.5498	67995	64864	190940	64493	68889	0	58984	0	0	59632	67129	68587	64149	75740	69780	0
81	B2RYW9	B2RYW9	Fumarylacetoacetate hydrolase domain-containing protein 2	Fahd2	sp|B2RYW9|FAHD2_RAT Fumarylacetoacetate hydrolase domain-containing protein 2 OS=Rattus norvegicus OX=10116 GN=Fahd2 PE=1 SV=1	60.1	34.581	1949700	1935500	1635600	1975300	1655600	1891800	2123400	2126200	1659100	1524800	1928900	1758600	1858000	1756800	1564600	1741500
82	B2RZ37	B2RZ37	Receptor expression-enhancing protein 5	Reep5	sp|B2RZ37|REEP5_RAT Receptor expression-enhancing protein 5 OS=Rattus norvegicus OX=10116 GN=Reep5 PE=1 SV=1	15.9	21.431	623750	993690	625740	633070	533060	565200	759750	588260	567510	712560	556150	563120	537980	1045000	575730	492960
83	B2RZ78;B2RZ78-2	B2RZ78;B2RZ78-2	Vacuolar protein sorting-associated protein 29	Vps29	sp|B2RZ78|VPS29_RAT Vacuolar protein sorting-associated protein 29 OS=Rattus norvegicus OX=10116 GN=Vps29 PE=1 SV=2;sp|B2RZ78-2|VPS29_RAT Isoform 2 of Vacuolar protein sorting-associated protein 29 OS=Rattus norvegicus OX=10116 GN=Vps29	29.1	20.468	317340	527980	357960	355380	303380	364640	387500	276400	384570	690120	464720	369430	400130	551940	444970	297840
84	B2RZD2	B2RZD2	Complex I assembly factor TMEM126B, mitochondrial	Tmem126b	sp|B2RZD2|T126B_RAT Complex I assembly factor TMEM126B, mitochondrial OS=Rattus norvegicus OX=10116 GN=Tmem126b PE=1 SV=2	13.1	25.213	131440	63964	0	149210	137000	142530	123710	0	162170	0	20430	210580	162590	0	179480	173690
85	B2RZD7	B2RZD7	LYR motif-containing protein 9	Lyrm9	sp|B2RZD7|LYRM9_RAT LYR motif-containing protein 9 OS=Rattus norvegicus OX=10116 GN=Lyrm9 PE=3 SV=1	48.7	9.3787	120110	92710	126280	117030	0	113710	114430	48598	0	112770	0	108140	158690	0	102890	111680
86	B3GNI6-3;B3GNI6;B3GNI6-2	B3GNI6-3;B3GNI6;B3GNI6-2	Septin-11	2021-09-11	sp|B3GNI6-3|SEP11_RAT Isoform 3 of Septin-11 OS=Rattus norvegicus OX=10116 GN=Septin11;sp|B3GNI6|SEP11_RAT Septin-11 OS=Rattus norvegicus OX=10116 GN=Septin11 PE=1 SV=1;sp|B3GNI6-2|SEP11_RAT Isoform 2 of Septin-11 OS=Rattus norvegicus OX=10116 GN=Septin11	37.4	48.964	984470	1210600	2077800	1006500	1001800	917210	1064400	1086000	1103000	1948300	1296500	1180700	1354600	1604700	1448900	1113100
87	B4F779	B4F779		Appl2	sp|B4F779|DP13B_RAT DCC-interacting protein 13-beta OS=Rattus norvegicus OX=10116 GN=Appl2 PE=2 SV=1	21	74.116	189050	254940	430110	260790	190800	271440	229020	203220	151970	300550	208780	203080	215650	217250	261700	193950
88	B4F7A1	B4F7A1	Complex III assembly factor LYRM7	Lyrm7	sp|B4F7A1|LYRM7_RAT Complex III assembly factor LYRM7 OS=Rattus norvegicus OX=10116 GN=Lyrm7 PE=3 SV=1	45.2	12.03	220310	262620	560500	229870	276360	227710	227800	231710	269900	292440	313030	264010	347260	315260	329030	292730
89	B4F7E7	B4F7E7		Mpp5	sp|B4F7E7|MPP5_RAT MAGUK p55 subfamily member 5 OS=Rattus norvegicus OX=10116 GN=Mpp5 PE=1 SV=1	3.7	77.152	0	0	0	0	0	0	0	0	0	0	0	0	0	1124800	0	0
90	B4F7E8	B4F7E8	Niban-like protein 1	Fam129b	sp|B4F7E8|NIBA2_RAT Protein Niban 2 OS=Rattus norvegicus OX=10116 GN=Niban2 PE=1 SV=1	22	84.73	188880	339880	453920	229420	216180	203750	269960	148960	193340	506220	307360	231680	282290	280110	313730	246610
91	B5DEH0	B5DEH0	LIM domain-containing protein 1	Limd1	sp|B5DEH0|LIMD1_RAT LIM domain-containing protein 1 OS=Rattus norvegicus OX=10116 GN=Limd1 PE=1 SV=1	20.4	71.392	241590	228010	284740	216940	197310	160680	275050	165290	222450	349790	257330	225910	264570	314800	285540	214120
92	B5DEH2	B5DEH2	Erlin-2	Erlin2	sp|B5DEH2|ERLN2_RAT Erlin-2 OS=Rattus norvegicus OX=10116 GN=Erlin2 PE=1 SV=1	43.1	37.71	638640	841250	1569600	611010	588800	608960	632690	637800	771040	1330500	704580	734980	650480	1152000	766700	736410
93	B5DEN9	B5DEN9	Vacuolar protein sorting-associated protein 28 homolog	Vps28	sp|B5DEN9|VPS28_RAT Vacuolar protein sorting-associated protein 28 homolog OS=Rattus norvegicus OX=10116 GN=Vps28 PE=2 SV=1	43.4	26.11	242390	225790	161770	264030	268980	261940	263470	348170	218350	231770	380360	338680	245030	267680	280220	324940
94	B5DEQ3	B5DEQ3	Probable Xaa-Pro aminopeptidase 3	Xpnpep3	sp|B5DEQ3|XPP3_RAT Xaa-Pro aminopeptidase 3 OS=Rattus norvegicus OX=10116 GN=Xpnpep3 PE=1 SV=1	26.9	56.454	496300	637640	1230200	520440	448770	473420	598220	499630	554200	828400	711000	632630	711390	616170	710070	573960
95	B5DF07	B5DF07	Mitochondrial ribonuclease P protein 3	Mrpp3	sp|B5DF07|MRPP3_RAT Mitochondrial ribonuclease P catalytic subunit OS=Rattus norvegicus OX=10116 GN=Prorp PE=2 SV=1	6.3	67.007	0	0	0	0	0	0	0	35700	0	0	0	0	0	0	0	0
96	B5DF51	B5DF51	Membrane magnesium transporter 1	Mmgt1	sp|B5DF51|EMC5_RAT ER membrane protein complex subunit 5 OS=Rattus norvegicus OX=10116 GN=Mmgt1 PE=2 SV=1	26.7	14.677	0	0	0	78808	84435	0	71142	71772	139800	0	0	0	0	0	56228	0
97	B5DF89	B5DF89	Cullin-3	Cul3	sp|B5DF89|CUL3_RAT Cullin-3 OS=Rattus norvegicus OX=10116 GN=Cul3 PE=1 SV=2	21	88.931	282350	296240	291930	234970	320870	314140	262050	237400	285100	495240	287770	318530	324340	409770	328320	283140
98	B5DF91	B5DF91	ELAV-like protein	Elavl1	sp|B5DF91|ELAV1_RAT ELAV-like protein 1 OS=Rattus norvegicus OX=10116 GN=Elavl1 PE=1 SV=1	50	36.169	1647100	1372500	2074400	1573200	1478600	1475600	1527400	1193200	1397900	1835900	1606800	1706100	1790100	1712300	1778600	1597700
99	B5DF93	B5DF93	Protein PAT1 homolog 1	Patl1	sp|B5DF93|PATL1_RAT Protein PAT1 homolog 1 OS=Rattus norvegicus OX=10116 GN=Patl1 PE=2 SV=1	4.3	86.868	92161	52843	106060	83748	82209	107500	81383	59355	95224	85754	110350	125600	129200	81554	94380	113190
100	B5DFC8	B5DFC8	Eukaryotic translation initiation factor 3 subunit C	Eif3c	sp|B5DFC8|EIF3C_RAT Eukaryotic translation initiation factor 3 subunit C OS=Rattus norvegicus OX=10116 GN=Eif3c PE=1 SV=1	25.8	105.43	1234400	1347900	1496800	1078000	964760	1206000	1168000	998960	958610	1484900	1309600	1177100	1298200	1198600	1291300	1163600
101	B5DFC9;B5DFC9-2	B5DFC9	Nidogen-2	Nid2	sp|B5DFC9|NID2_RAT Nidogen-2 OS=Rattus norvegicus OX=10116 GN=Nid2 PE=2 SV=1	25.4	152.97	815330	962310	1210800	770780	710000	762370	910250	791960	970590	1432300	950350	889260	1157300	922280	1117500	778850
102	B5DFN2	B5DFN2	Adenosylhomocysteinase	Ahcyl1	sp|B5DFN2|SAHH2_RAT S-adenosylhomocysteine hydrolase-like protein 1 OS=Rattus norvegicus OX=10116 GN=Ahcyl1 PE=1 SV=2	7.5	53.753	165030	201050	176280	162180	159950	159170	172380	149370	215560	192230	151940	174100	155680	238060	185800	148520
103	B5DFN3	B5DFN3	Ubiquinol-cytochrome-c reductase complex assembly factor 2	Uqcc2	sp|B5DFN3|UQCC2_RAT Ubiquinol-cytochrome-c reductase complex assembly factor 2 OS=Rattus norvegicus OX=10116 GN=Uqcc2 PE=2 SV=1	50.7	16.33	759890	1067800	1836900	824260	853390	770620	738310	732380	861990	1074000	899110	881400	774900	860050	1074500	927280
104	C0HLM6	C0HLM6			sp|C0HLM6|SIM20_RAT Small integral membrane protein 20 OS=Rattus norvegicus OX=10116 GN=Smim20 PE=1 SV=1	50.7	7.8	763700	961730	1974000	753000	770900	766940	688650	574540	885500	975530	801470	786570	826470	562390	1095500	629590
105	C9WPN6	C9WPN6		Eif2s3y	sp|C9WPN6|IF2H_RAT Eukaryotic translation initiation factor 2 subunit 3, Y-linked OS=Rattus norvegicus OX=10116 GN=Eif2s3y PE=2 SV=2	34.3	51.153	0	0	0	0	0	0	0	0	0	0	0	0	0	58464	0	0
106	CON__ENSEMBL:ENSBTAP00000007350;CON__P01030	CON__ENSEMBL:ENSBTAP00000007350;CON__P01030			;	4.2	192.99	0	1444900	0	0	2217300	0	0	0	0	0	0	0	0	0	0	0
107	CON__ENSEMBL:ENSBTAP00000016046	CON__ENSEMBL:ENSBTAP00000016046				4.5	77.456	0	0	0	0	106560	0	0	0	0	0	42221	0	0	0	0	0
108	CON__ENSEMBL:ENSBTAP00000016285	CON__ENSEMBL:ENSBTAP00000016285				2.5	63.485	0	0	0	0	0	0	0	0	0	0	0	0	0	0	0	77200
109	CON__ENSEMBL:ENSBTAP00000024146	CON__ENSEMBL:ENSBTAP00000024146				1.7	164.34	0	0	0	0	0	0	0	0	0	0	0	0	0	0	0	7315
110	CON__ENSEMBL:ENSBTAP00000025008	CON__ENSEMBL:ENSBTAP00000025008				8.2	59.299	0	0	0	0	0	2119.4	0	0	0	0	0	0	0	0	0	0
111	CON__ENSEMBL:ENSBTAP00000038253	CON__ENSEMBL:ENSBTAP00000038253				16.3	63.165	0	0	0	0	0	0	0	0	0	0	0	0	0	0	0	73632
112	CON__P00761	CON__P00761				58.9	24.409	55151000	64098000	10653000	54360000	32466000	39542000	50739000	24043000	49840000	77988000	51254000	63444000	56426000	72449000	52142000	57723000
113	CON__P01966	CON__P01966				41.5	15.184	212860	0	0	0	0	0	0	0	175860	0	0	0	0	0	0	0
114	CON__P02533;CON__Q6IFX2;Q6IFU7;CON__A2A4G1;CON__P19012;CON__Q61782;CON__P35900;CON__Q9D312;P25030;Q6IFW5;CON__Q8N1A0	CON__P02533				65.5	51.621	253400	116540	82874	290620	115650	100950	1364300	0	210940	9342600	375470	226330	199510	53508	461250	22917
115	CON__P02538;CON__P04259;CON__P48668;CON__O95678;CON__Q8VED5;CON__P07744;Q6IG00;CON__Q14CN4-1;CON__Q6IME9;CON__Q7RTS7;CON__Q32MB2;Q6IG04;CON__H-INV:HIT000016045;CON__Q3SY84	CON__P02538;CON__P04259;CON__P48668			;;	42.4	60.044	0	10060	14504	42235	29986	13911	123100	0	16424	5217400	0	0	23796	0	17939	0
116	CON__P02584	CON__P02584				56.4	15.057	286370	7044.1	0	0	0	0	0	0	0	0	0	0	0	2719.2	0	0
117	CON__P02662	CON__P02662				45.7	22.975	495310	280150	0	384630	1182800	506680	2697500	537750	513040	590170	398300	1542100	746040	713730	721800	424220
118	CON__P02663	CON__P02663				27.1	24.348	0	90772	0	0	75021	0	748750	0	0	0	0	97890	0	50036	0	0
119	CON__P02666	CON__P02666				23.4	23.583	415160	234710	0	411750	1361200	510000	2261000	163030	332500	0	136270	1210000	554130	184740	273180	294430
120	CON__P02668	CON__P02668				23.1	18.974	31273	43579	8256.5	39498	402550	63427	1108000	5428.5	62582	50548	19624	322720	70346	174750	199490	21509
121	CON__P02754	CON__P02754				56.8	18.281	83116	55163	0	176500	486070	40301	1169900	321560	59051	96880	55133	583750	185520	63173	125640	97502
122	CON__P02768-1	CON__P02768-1				23.3	69.366	2551700	3817300	1630500	2703200	2044100	3018700	3207400	2282900	2102000	4268400	3498000	2363200	2590500	3303200	2601900	2300200
123	CON__P02769	CON__P02769				74.6	69.293	12786000	10660000	14498000	13571000	12414000	11938000	10984000	8095300	13320000	4090200	7771000	1517600	6630500	2046100	99786000	1207900
124	CON__P04264	CON__P04264				60.6	66.017	2140000	3221700	2645300	6754300	4407800	3527400	17636000	1519900	7228400	29536000	3824000	5527200	3611500	2162900	5814600	1126700
125	CON__P07477;P00763	CON__P07477;P00763	Anionic trypsin-2	Prss2	;sp|P00763|TRY2_RAT Anionic trypsin-2 OS=Rattus norvegicus OX=10116 GN=Prss2 PE=1 SV=2	12.1	26.558	1247600	245900	0	0	0	0	386450	0	0	0	0	0	0	0	0	0
126	CON__P08727;Q63279	CON__P08727;Q63279	Keratin, type I cytoskeletal 19	Krt19	;sp|Q63279|K1C19_RAT Keratin, type I cytoskeletal 19 OS=Rattus norvegicus OX=10116 GN=Krt19 PE=1 SV=2	25.5	44.091	81898	0	0	0	0	0	0	0	0	0	0	0	0	0	0	0
127	CON__P08779	CON__P08779				55.8	51.267	0	0	0	12254	5626.2	24954	157200	0	14996	3304700	24298	0	8207	0	4078	0
128	CON__P12763	CON__P12763				16.4	38.418	855940	220110	0	13977	0	33493	0	0	337150	42647	0	0	0	30169	0	0
129	CON__P13645;Q6IFW6;CON__P02535-1;CON__Q7Z3Y7;CON__Q148H6;CON__Q7Z3Z0;CON__Q2M2I5;CON__Q7Z3Y8;CON__Q99456;CON__REFSEQ:XP_986630;CON__Q14525;CON__Q9UE12;CON__P05784;CON__A2A5Y0;CON__Q15323;Q6IFW8;Q6IFX0;Q6IFW2;Q5BJY9;CON__Q92764	CON__P13645				61.7	59.51	3100400	3115400	4187400	7276300	3169000	2932800	13298000	2111000	7036100	35216000	3601200	12682000	3824800	2430000	4686200	1481400
130	CON__P13647	CON__P13647				43.7	62.378	15631	32722	0	200390	109450	45200	495750	11850	136820	6073300	28712	99867	85243	0	86994	11664
131	CON__P20930	CON__P20930				0.5	435.16	0	0	0	0	0	0	0	0	0	28133	0	0	0	0	0	0
132	CON__P35527	CON__P35527				55.4	62.129	702630	1110700	826650	2732900	2220000	1442200	8042000	731120	2318500	2317300	1637500	468920	959960	595460	2445100	344870
133	CON__P35908v2;CON__P35908;Q6IG02;CON__Q9R0H5;CON__Q7Z794	CON__P35908v2;CON__P35908			;	66.8	65.432	988880	785550	1075200	2005500	653750	738200	3582000	485600	2145100	3502500	799800	5968800	1255900	748730	1333600	280610
134	CON__P41361	CON__P41361				8	52.347	368980	535690	300600	411420	448890	484600	458050	305280	532900	498990	585530	427610	170690	661830	492620	481530
135	CON__P62894;P10715	CON__P62894				52.4	11.703	0	0	0	0	0	0	0	0	0	0	0	0	46521	0	373200	0
136	CON__Q04695	CON__Q04695				54.4	48.105	410600	575270	1113000	475080	449630	533950	0	491460	392220	5728900	566450	528170	586280	624290	670820	344640
137	CON__Q0VCM5	CON__Q0VCM5				2.5	101.24	95184	229050	208320	91199	130900	112730	115850	47025	0	209960	104530	54596	0	166980	0	0
138	CON__Q1A7A4	CON__Q1A7A4				0.8	188.74	0	0	0	0	0	0	0	0	0	0	0	0	0	0	10862	0
139	CON__Q28194	CON__Q28194				2	129.39	201490	127890	172150	141540	237060	203490	199000	122750	182890	232840	242710	209050	241000	188180	238310	198130
140	CON__Q2HJF0	CON__Q2HJF0				3.2	69.182	0	0	0	0	0	0	0	0	0	0	0	0	0	0	0	162960
141	CON__Q2KJC7	CON__Q2KJC7				18.6	86.858	1494000	1755100	1514700	1274000	1176500	984580	2624400	2712800	1400800	3894700	3625900	2597100	3751500	2231500	4173100	1989600
142	CON__Q3KUS7	CON__Q3KUS7				2.2	85.411	0	0	0	0	0	0	0	0	0	0	0	0	0	0	0	88696
143	CON__Q3SX09	CON__Q3SX09				18.9	22.06	0	0	0	0	0	0	0	0	0	9993.1	0	0	0	0	0	0
144	CON__Q3SX28	CON__Q3SX28				75.7	33.012	603920	606440	1908800	531860	628700	671860	657960	864890	1160500	1281200	820410	1120000	967420	742450	844110	800040
145	CON__Q3SZR3	CON__Q3SZR3				9.4	23.182	0	0	0	0	0	0	0	0	0	0	0	0	0	0	24075	0
146	CON__Q3T052	CON__Q3T052				6.4	101.51	0	0	257930	0	0	0	0	0	247490	104150	0	0	0	0	0	0
147	CON__Q3ZBD7	CON__Q3ZBD7				19.2	62.87	111170	0	0	0	0	0	0	0	96973	0	0	0	0	0	0	0
148	CON__Q5D862	CON__Q5D862				0.8	248.07	0	0	0	0	0	0	0	0	0	47160	0	0	0	0	0	0
149	CON__Q6IFU6	CON__Q6IFU6				4.3	55.651	0	0	0	0	0	0	0	0	0	0	0	0	0	0	0	100340
150	CON__Q8N1N4-2;CON__Q7RTT2	CON__Q8N1N4-2;CON__Q7RTT2			;	10	56.964	0	0	0	0	0	0	0	0	0	98551	0	0	0	0	0	0
151	CON__Q9TRI1	CON__Q9TRI1				3.9	106.19	417030	422650	763530	418270	375130	475870	460350	338870	439790	368720	363840	353530	453630	383270	364470	410120
152	D2XV59	D2XV59	GTP-binding protein 1	Gtpbp1	sp|D2XV59|GTPB1_RAT GTP-binding protein 1 OS=Rattus norvegicus OX=10116 GN=Gtpbp1 PE=1 SV=1	22.9	72.488	489320	473570	411510	702840	652610	696930	531980	601730	890670	715800	1115700	1153300	1114900	885700	1109100	1077700
153	D3Z8L7	D3Z8L7	Ras-related protein R-Ras	Rras	sp|D3Z8L7|RRAS_RAT Ras-related protein R-Ras OS=Rattus norvegicus OX=10116 GN=Rras PE=1 SV=1	41.7	23.909	634000	841170	965850	711540	705870	701290	693780	654280	880600	1008100	957320	865180	957400	962490	959040	755390
154	D3Z9R8	D3Z9R8	6.8 kDa mitochondrial proteolipid	Mp68	sp|D3Z9R8|ATP68_RAT ATP synthase subunit ATP5MPL, mitochondrial OS=Rattus norvegicus OX=10116 GN=Atp5mpl PE=1 SV=1	13.3	6.9142	2130200	1245200	536390	1308500	1675700	1210900	1554600	1402900	2042600	1299800	1398600	1575400	1187400	1690100	1525500	1664100
155	D3Z9Z9	D3Z9Z9	SWI/SNF-related matrix-associated actin-dependent regulator of chromatin subfamily A containing DEAD/H box 1	Smarcad1	sp|D3Z9Z9|SMRCD_RAT SWI/SNF-related matrix-associated actin-dependent regulator of chromatin subfamily A containing DEAD/H box 1 OS=Rattus norvegicus OX=10116 GN=Smarcad1 PE=1 SV=1	1.8	116.79	0	0	0	0	0	0	0	0	0	0	0	0	0	0	23111	0
156	D3ZAF6	D3ZAF6	ATP synthase subunit f, mitochondrial	Atp5j2	sp|D3ZAF6|ATPK_RAT ATP synthase subunit f, mitochondrial OS=Rattus norvegicus OX=10116 GN=Atp5mf PE=1 SV=1	50	10.452	18731000	18253000	6938200	15004000	22211000	19092000	17875000	11652000	24934000	17692000	18915000	22170000	17703000	22658000	19440000	19474000
157	D3ZAR1	D3ZAR1		Ldlrap1	sp|D3ZAR1|ARH_RAT Low density lipoprotein receptor adapter protein 1 OS=Rattus norvegicus OX=10116 GN=Ldlrap1 PE=1 SV=2	5.2	33.785	0	0	0	0	0	0	0	0	0	0	0	0	0	0	0	24977
158	D3ZAW2	D3ZAW2		Pisd	sp|D3ZAW2|PISD_RAT Phosphatidylserine decarboxylase proenzyme, mitochondrial OS=Rattus norvegicus OX=10116 GN=Pisd PE=1 SV=3	8.6	45.823	56347	67183	45028	50983	47474	59865	45352	69109	131580	172940	48734	47735	0	128110	53505	49359
159	D3ZBE5	D3ZBE5	Serine/threonine-protein kinase Nek7	Nek7	sp|D3ZBE5|NEK7_RAT Serine/threonine-protein kinase Nek7 OS=Rattus norvegicus OX=10116 GN=Nek7 PE=2 SV=1	25.5	34.529	111740	238140	359080	156310	111380	154260	120620	119500	215860	361330	140280	112640	145710	294440	152170	119160
160	D3ZBN0	D3ZBN0	Histone H1.5	Hist1h1b	sp|D3ZBN0|H15_RAT Histone H1.5 OS=Rattus norvegicus OX=10116 GN=H1-5 PE=1 SV=1	38.7	22.649	2525200	3672600	6696000	2555200	2619900	2399600	2840500	2147800	3333300	6172700	4286900	4018800	4654000	5580500	5203300	3616300
161	D3ZC96	D3ZC96	Tetratricopeptide repeat protein 39B	Ttc39b	sp|D3ZC96|TT39B_RAT Tetratricopeptide repeat protein 39B OS=Rattus norvegicus OX=10116 GN=Ttc39b PE=3 SV=1	3.1	70.167	0	0	0	0	0	0	0	0	0	0	0	0	0	0	0	20331
162	D3ZCL3	D3ZCL3	U1 small nuclear ribonucleoprotein C	Snrpc	sp|D3ZCL3|RU1C_RAT U1 small nuclear ribonucleoprotein C OS=Rattus norvegicus OX=10116 GN=Snrpc PE=3 SV=1	13.2	17.364	67422	0	0	62272	55915	72419	53354	57846	49010	100800	77557	0	95439	66147	96024	76022
163	D3ZD05	D3ZD05		Kank2	sp|D3ZD05|KANK2_RAT KN motif and ankyrin repeat domain-containing protein 2 OS=Rattus norvegicus OX=10116 GN=Kank2 PE=1 SV=2	50.5	90.883	1333200	1692600	3083700	1418000	1257700	1373200	1513400	1422900	1690200	2162500	1615700	1605100	1705700	1984500	1745200	1476900
164	D3ZD32	D3ZD32	Chromodomain-helicase-DNA-binding protein 5	Chd5	sp|D3ZD32|CHD5_RAT Chromodomain-helicase-DNA-binding protein 5 OS=Rattus norvegicus OX=10116 GN=Chd5 PE=1 SV=1	2.7	222.26	154510	179350	191650	164710	121930	169470	154650	151930	179430	289170	212090	188840	210760	193120	242770	180700
165	D3ZDK7	D3ZDK7		Pgp	sp|D3ZDK7|PGP_RAT Glycerol-3-phosphate phosphatase OS=Rattus norvegicus OX=10116 GN=Pgp PE=1 SV=1	52.6	34.6	799550	606560	651450	793990	826020	889380	779360	913710	806230	524170	640970	555960	645140	548610	670850	745150
166	D3ZF77	D3ZF77		Akr1cl	sp|D3ZF77|AK1CA_RAT Aldo-keto reductase family 1 member C15 OS=Rattus norvegicus OX=10116 GN=Akr1c15 PE=1 SV=1	53.7	37.194	2127900	3044200	2533700	2481200	2392700	2771600	2578500	2892500	2902300	3080500	2648800	2033100	2389000	2671600	2305900	2400900
167	D3ZFD0	D3ZFD0		Myo18a	sp|D3ZFD0|MY18A_RAT Unconventional myosin-XVIIIa OS=Rattus norvegicus OX=10116 GN=Myo18a PE=1 SV=2	25.3	232.66	2147400	2623200	3448600	2127800	2115200	2392700	2059700	1971300	2307400	3192500	2608900	2605400	2783800	2540800	2821400	2436500
168	D3ZHA0	D3ZHA0	Filamin-C	Flnc	sp|D3ZHA0|FLNC_RAT Filamin-C OS=Rattus norvegicus OX=10116 GN=Flnc PE=1 SV=1	46.1	290.98	20265000	22251000	23108000	19730000	20093000	19590000	20131000	18098000	18450000	22465000	15207000	13951000	15819000	17804000	19046000	14547000
169	D3ZHR2	D3ZHR2		Abcd1	sp|D3ZHR2|ABCD1_RAT ATP-binding cassette sub-family D member 1 OS=Rattus norvegicus OX=10116 GN=Abcd1 PE=1 SV=1	5.3	81.937	0	0	0	0	0	0	0	0	43904	45742	0	0	0	44720	0	0
170	D3ZHV2	D3ZHV2	Microtubule-actin cross-linking factor 1	Macf1	sp|D3ZHV2|MACF1_RAT Microtubule-actin cross-linking factor 1 OS=Rattus norvegicus OX=10116 GN=Macf1 PE=1 SV=1	20.3	619.59	2091500	2568200	4176900	1879900	1834800	2035100	2090400	1904700	2193000	4003800	2501100	2054800	2839800	2748500	2616200	2015600
171	D3ZIE4	D3ZIE4		Fyb	sp|D3ZIE4|FYB1_RAT FYN-binding protein 1 OS=Rattus norvegicus OX=10116 GN=Fyb1 PE=1 SV=2	2.7	91.411	162130	0	0	0	177590	145920	143020	0	0	0	156570	159290	105870	0	0	152520
172	D3ZJ96-2;D3ZJ96	D3ZJ96-2;D3ZJ96	Ubiquitin carboxyl-terminal hydrolase 28	Usp28	sp|D3ZJ96-2|UBP28_RAT Isoform 2 of Ubiquitin carboxyl-terminal hydrolase 28 OS=Rattus norvegicus OX=10116 GN=Usp28;sp|D3ZJ96|UBP28_RAT Ubiquitin carboxyl-terminal hydrolase 28 OS=Rattus norvegicus OX=10116 GN=Usp28 PE=2 SV=2	14.8	119.32	371860	451610	519820	304420	296020	382400	380900	257670	350720	582010	472570	429550	393990	483930	462350	438910
173	D3ZKD3	D3ZKD3	RNA demethylase ALKBH5	Alkbh5	sp|D3ZKD3|ALKB5_RAT RNA demethylase ALKBH5 OS=Rattus norvegicus OX=10116 GN=Alkbh5 PE=1 SV=1	10.6	44.453	0	0	0	0	0	0	0	0	0	26199	0	0	0	0	0	0
174	D3ZKT0	D3ZKT0	Phosphatidate cytidylyltransferase, mitochondrial	Tamm41	sp|D3ZKT0|TAM41_RAT Phosphatidate cytidylyltransferase, mitochondrial OS=Rattus norvegicus OX=10116 GN=Tamm41 PE=1 SV=1	11.9	37.785	82879	94566	280450	88112	82002	72739	102480	77318	41027	140730	71093	99210	107180	62434	106040	0
175	D3ZN43	D3ZN43	NADH dehydrogenase (ubiquinone) complex I, assembly factor 6	Ndufaf6	sp|D3ZN43|NDUF6_RAT NADH dehydrogenase (ubiquinone) complex I, assembly factor 6 OS=Rattus norvegicus OX=10116 GN=Ndufaf6 PE=3 SV=1	27.3	38.515	690520	827830	1075200	665230	664660	520060	683460	630220	811300	692120	770810	556900	682540	674000	599450	614800
176	D3ZQL6	D3ZQL6	MICAL-like protein 1	Micall1	sp|D3ZQL6|MILK1_RAT MICAL-like protein 1 OS=Rattus norvegicus OX=10116 GN=Micall1 PE=1 SV=1	15.4	92.643	188010	236680	402200	259000	207930	247230	188920	345590	168580	213190	182020	91871	193520	209040	239250	199900
177	D3ZQL7	D3ZQL7		Tppp	sp|D3ZQL7|TPPP_RAT Tubulin polymerization-promoting protein OS=Rattus norvegicus OX=10116 GN=Tppp PE=1 SV=1	32.1	23.546	508710	494880	650770	688860	548580	684160	630520	670270	429100	412010	525910	437070	450400	394710	434940	477110
178	D3ZRC4	D3ZRC4		Pnpla8	sp|D3ZRC4|PLPL8_RAT Calcium-independent phospholipase A2-gamma OS=Rattus norvegicus OX=10116 GN=Pnpla8 PE=3 SV=1	5	87.96	122570	0	150210	0	0	133290	127010	103580	120170	490630	171970	154530	189290	164550	142660	109870
179	D3ZS74	D3ZS74	Metalloendopeptidase OMA1, mitochondrial	Oma1	sp|D3ZS74|OMA1_RAT Metalloendopeptidase OMA1, mitochondrial OS=Rattus norvegicus OX=10116 GN=Oma1 PE=3 SV=1	3.2	57.144	0	0	0	0	0	0	0	0	0	0	0	0	0	0	0	24464
180	D3ZTE0	D3ZTE0	Coagulation factor XII;Coagulation factor XIIa heavy chain;Coagulation factor XIIa light chain	F12	sp|D3ZTE0|FA12_RAT Coagulation factor XII OS=Rattus norvegicus OX=10116 GN=F12 PE=2 SV=1	11.8	65.843	45908	46105	0	42815	64662	44635	51871	45767	54877	0	50122	0	48993	60733	56711	44042
181	D3ZTX0	D3ZTX0	Transmembrane emp24 domain-containing protein 7	Tmed7	sp|D3ZTX0|TMED7_RAT Transmembrane emp24 domain-containing protein 7 OS=Rattus norvegicus OX=10116 GN=Tmed7 PE=1 SV=1	27	25.479	167940	158090	80237	180710	174220	194610	210060	175180	237610	199720	211430	187920	211180	209960	220950	193320
182	D3ZUA0	D3ZUA0	Probable bifunctional methylenetetrahydrofolate dehydrogenase/cyclohydrolase 2;NAD-dependent methylenetetrahydrofolate dehydrogenase;Methenyltetrahydrofolate cyclohydrolase	Mthfd2l	sp|D3ZUA0|MTD2L_RAT Probable bifunctional methylenetetrahydrofolate dehydrogenase/cyclohydrolase 2 OS=Rattus norvegicus OX=10116 GN=Mthfd2l PE=1 SV=1	16.9	36.426	0	0	0	0	0	0	69783	0	0	113660	0	0	0	126250	0	0
183	D3ZUI5	D3ZUI5	Protein cordon-bleu	Cobl	sp|D3ZUI5|COBL_RAT Protein cordon-bleu OS=Rattus norvegicus OX=10116 GN=Cobl PE=1 SV=1	1.7	122.27	0	0	0	0	0	0	0	0	0	0	0	0	0	0	0	20344
184	D3ZUQ0	D3ZUQ0	RILP-like protein 1	Rilpl1	sp|D3ZUQ0|RIPL1_RAT RILP-like protein 1 OS=Rattus norvegicus OX=10116 GN=Rilpl1 PE=1 SV=1	9.9	47.33	0	0	0	0	89667	39336	0	116680	0	0	0	0	0	0	0	0
185	D3ZVF4	D3ZVF4	Trafficking protein particle complex subunit 2	Trappc2	sp|D3ZVF4|TPPC2_RAT Trafficking protein particle complex subunit 2 OS=Rattus norvegicus OX=10116 GN=Trappc2 PE=3 SV=1	29.3	16.453	0	0	0	0	0	45071	0	0	0	0	0	142480	0	0	0	0
186	D3ZVR7	D3ZVR7	Prostamide/prostaglandin F synthase	Fam213b	sp|D3ZVR7|PXL2B_RAT Prostamide/prostaglandin F synthase OS=Rattus norvegicus OX=10116 GN=Prxl2b PE=3 SV=1	17.9	21.607	53860	69501	0	55648	61812	60789	64133	0	106920	71890	0	0	53025	62644	46073	42986
187	D3ZW55	D3ZW55	Inosine triphosphate pyrophosphatase	Itpa	sp|D3ZW55|ITPA_RAT Inosine triphosphate pyrophosphatase OS=Rattus norvegicus OX=10116 GN=Itpa PE=3 SV=1	55.1	21.927	626980	763700	1691600	940790	755670	816480	455860	869170	440500	1035000	1014600	804180	763390	756650	851080	677790
188	D3ZX08	D3ZX08	Alanine--tRNA ligase, mitochondrial	Aars2	sp|D3ZX08|SYAM_RAT Alanine--tRNA ligase, mitochondrial OS=Rattus norvegicus OX=10116 GN=Aars2 PE=3 SV=1	16.1	107.8	240840	398060	461240	245180	261540	254100	268230	226550	333520	406470	304330	267480	302440	408490	328220	229100
189	D3ZXK7	D3ZXK7	E3 ubiquitin-protein ligase RNF123	Rnf123	sp|D3ZXK7|RN123_RAT E3 ubiquitin-protein ligase RNF123 OS=Rattus norvegicus OX=10116 GN=Rnf123 PE=1 SV=1	4.8	149.08	271130	204230	468510	224820	307280	216320	243500	138440	207500	278640	233870	253210	238030	391770	206880	244730
190	D3ZXS4	D3ZXS4		Lrrc39	sp|D3ZXS4|LRC39_RAT Leucine-rich repeat-containing protein 39 OS=Rattus norvegicus OX=10116 GN=Lrrc39 PE=1 SV=1	36.2	38.715	373430	418930	492090	462340	324840	436700	399630	415460	327630	561760	442920	385800	435160	337840	497750	355790
191	D3ZY68	D3ZY68	Glutamyl-tRNA(Gln) amidotransferase subunit C, mitochondrial	Gatc	sp|D3ZY68|GATC_RAT Glutamyl-tRNA(Gln) amidotransferase subunit C, mitochondrial OS=Rattus norvegicus OX=10116 GN=Gatc PE=3 SV=1	23.9	16.833	78239	117320	130490	114780	110160	114900	96384	99618	109170	120900	111700	79626	101680	98308	103850	75389
192	D3ZYR1	D3ZYR1	F-BAR domain only protein 2	Fcho2	sp|D3ZYR1|FCHO2_RAT F-BAR domain only protein 2 OS=Rattus norvegicus OX=10116 GN=Fcho2 PE=1 SV=1	3	88.711	0	0	0	0	0	0	0	100770	83384	0	0	0	0	151350	0	22600
193	D3ZYW7	D3ZYW7	Frataxin, mitochondrial;Frataxin intermediate form;Frataxin mature form	Fxn	sp|D3ZYW7|FRDA_RAT Frataxin, mitochondrial OS=Rattus norvegicus OX=10116 GN=Fxn PE=1 SV=1	29.3	23.066	445550	402780	449510	358230	256380	352950	473530	389430	0	719760	606430	636180	546330	384460	437430	519560
194	D3ZZ80	D3ZZ80	Obscurin-like protein 1	Obsl1	sp|D3ZZ80|OBSL1_RAT Obscurin-like protein 1 OS=Rattus norvegicus OX=10116 GN=Obsl1 PE=2 SV=3	30.6	197.86	1445400	1804300	3077700	1303100	1434700	1554800	1438100	1424200	1448600	1350500	1555400	1337500	1475800	1334500	1583000	1357700
195	D3ZZC3	D3ZZC3	Kelch-like protein 22	Klhl22	sp|D3ZZC3|KLH22_RAT Kelch-like protein 22 OS=Rattus norvegicus OX=10116 GN=Klhl22 PE=1 SV=1	3.3	71.773	0	0	85403	0	0	0	24758	0	0	0	42738	0	45901	0	0	0
196	D3ZZN9	D3ZZN9		Syde1	sp|D3ZZN9|SYDE1_RAT Rho GTPase-activating protein SYDE1 OS=Rattus norvegicus OX=10116 GN=Syde1 PE=1 SV=1	4.5	80.377	0	0	0	20882	0	0	0	0	0	0	0	0	0	0	0	0
197	D3ZZX1	D3ZZX1		Inpp5a	sp|D3ZZX1|I5P1_RAT Inositol polyphosphate-5-phosphatase A OS=Rattus norvegicus OX=10116 GN=Inpp5a PE=1 SV=1	23.3	47.622	250530	400360	743570	307630	274970	269620	206920	225380	199340	313130	116880	215210	217370	286160	236460	159850
198	D4A1F2;D4A1F2-2	D4A1F2;D4A1F2-2	Protein-methionine sulfoxide oxidase MICAL2	Mical2	sp|D4A1F2|MICA2_RAT [F-actin]-monooxygenase MICAL2 OS=Rattus norvegicus OX=10116 GN=Mical2 PE=3 SV=1;sp|D4A1F2-2|MICA2_RAT Isoform 2 of [F-actin]-monooxygenase MICAL2 OS=Rattus norvegicus OX=10116 GN=Mical2	3.4	110.09	107690	0	0	151470	135050	254930	85282	0	0	0	0	0	0	0	0	0
199	D4A1J4	D4A1J4	3-hydroxybutyrate dehydrogenase type 2	Bdh2	sp|D4A1J4|BDH2_RAT 3-hydroxybutyrate dehydrogenase type 2 OS=Rattus norvegicus OX=10116 GN=Bdh2 PE=3 SV=2	22.4	26.65	130800	170810	316470	156740	167640	187190	219530	107910	139810	182490	213660	192730	226410	169680	152020	154300
200	D4A1R8	D4A1R8		Cpne1	sp|D4A1R8|CPNE1_RAT Copine-1 OS=Rattus norvegicus OX=10116 GN=Cpne1 PE=1 SV=1	11.4	58.843	271560	161300	149090	190090	275830	373320	192140	187470	229590	148730	247500	299240	224750	148520	226640	229780
201	D4A2Z8	D4A2Z8		Dhx36	sp|D4A2Z8|DHX36_RAT ATP-dependent DNA/RNA helicase DHX36 OS=Rattus norvegicus OX=10116 GN=Dhx36 PE=1 SV=1	2.9	113.84	0	0	0	0	0	0	0	0	0	0	0	0	0	0	34661	0
202	D4A3K5	D4A3K5	Histone H1.1	Hist1h1a	sp|D4A3K5|H11_RAT Histone H1.1 OS=Rattus norvegicus OX=10116 GN=H1-1 PE=1 SV=1	37.9	22.004	767370	848360	1307900	668870	814900	672530	755260	618910	867630	1202700	710940	776340	839870	1088700	930390	833690
203	D4A4T9	D4A4T9	Cysteine and histidine-rich domain-containing protein 1	Chordc1	sp|D4A4T9|CHRD1_RAT Cysteine and histidine-rich domain-containing protein 1 OS=Rattus norvegicus OX=10116 GN=Chordc1 PE=3 SV=1	26.9	37.361	315810	391220	114960	295920	254880	302950	282460	290250	314310	432600	242650	194240	248220	346110	271280	218000
204	D4A631	D4A631	Brefeldin A-inhibited guanine nucleotide-exchange protein 1	Arfgef1	sp|D4A631|BIG1_RAT Brefeldin A-inhibited guanine nucleotide-exchange protein 1 OS=Rattus norvegicus OX=10116 GN=Arfgef1 PE=1 SV=1	4.1	207.89	225430	0	0	0	0	0	0	0	0	86646	0	0	0	0	0	0
205	D4A6D7-2;D4A6D7	D4A6D7-2;D4A6D7	Tetratricopeptide repeat protein 19, mitochondrial	Ttc19	sp|D4A6D7-2|TTC19_RAT Isoform 2 of Tetratricopeptide repeat protein 19, mitochondrial OS=Rattus norvegicus OX=10116 GN=Ttc19;sp|D4A6D7|TTC19_RAT Tetratricopeptide repeat protein 19, mitochondrial OS=Rattus norvegicus OX=10116 GN=Ttc19 PE=3 SV=1	7.4	39.874	0	0	0	0	0	0	0	0	0	0	0	0	0	0	0	29391
206	D4A702	D4A702		Synpo2	sp|D4A702|SYNP2_RAT Synaptopodin-2 OS=Rattus norvegicus OX=10116 GN=Synpo2 PE=1 SV=2	56.5	136.02	5793500	7683300	11222000	6056400	5643500	5819100	6676400	6014800	6853100	7907000	6071200	5563900	5787500	6454500	6766300	5583300
207	D4A7C0	D4A7C0	GPN-loop GTPase 2	Gpn2	sp|D4A7C0|GPN2_RAT GPN-loop GTPase 2 OS=Rattus norvegicus OX=10116 GN=Gpn2 PE=3 SV=1	6.8	34.393	0	0	0	0	0	0	0	0	0	0	0	0	0	25079	0	0
208	D4A7N1	D4A7N1	MICOS complex subunit Mic25	Chchd6	sp|D4A7N1|MIC25_RAT MICOS complex subunit Mic25 OS=Rattus norvegicus OX=10116 GN=Chchd6 PE=1 SV=1	26.4	29.211	248040	351200	477720	327620	251490	340570	338380	255210	218770	620510	365560	420930	443500	342640	398020	287590
209	D4A929	D4A929	WD repeat-containing protein 81	Wdr81	sp|D4A929|WDR81_RAT WD repeat-containing protein 81 OS=Rattus norvegicus OX=10116 GN=Wdr81 PE=3 SV=1	1	212.26	0	0	0	0	0	0	0	0	0	0	0	0	14479	0	0	0
210	D4AAT7	D4AAT7	ATP-dependent (S)-NAD(P)H-hydrate dehydratase	Carkd	sp|D4AAT7|NNRD_RAT ATP-dependent (S)-NAD(P)H-hydrate dehydratase OS=Rattus norvegicus OX=10116 GN=Naxd PE=3 SV=1	44.3	36.518	531110	732700	353040	412890	475810	486730	515310	418450	489790	782850	451180	472300	415370	703940	533490	518970
211	D4AB98	D4AB98	Actin filament-associated protein 1-like 1	Afap1l1	sp|D4AB98|AF1L1_RAT Actin filament-associated protein 1-like 1 OS=Rattus norvegicus OX=10116 GN=Afap1l1 PE=1 SV=1	5.9	86.874	118750	79637	118800	86308	63445	80549	95334	0	95525	152140	76841	91739	37177	91409	94694	85708
212	D4ABP9	D4ABP9	F-box only protein 3	Fbxo3	sp|D4ABP9|FBX3_RAT F-box only protein 3 OS=Rattus norvegicus OX=10116 GN=Fbxo3 PE=3 SV=1	10.2	55.355	942460	514550	837210	1073800	475360	0	77273	280150	1196200	95963	579930	514600	485770	613230	865890	627440
213	D4ABY2	D4ABY2	Coatomer subunit gamma-2	Copg2	sp|D4ABY2|COPG2_RAT Coatomer subunit gamma-2 OS=Rattus norvegicus OX=10116 GN=Copg2 PE=3 SV=2	31	80.488	549840	636170	1296400	568890	572150	568140	564590	491830	514480	780920	639420	662530	626490	703900	668500	620040
214	D4ACN8	D4ACN8	Plasminogen receptor (KT)	Plgrkt	sp|D4ACN8|PLRKT_RAT Plasminogen receptor (KT) OS=Rattus norvegicus OX=10116 GN=Plgrkt PE=1 SV=1	22.4	17.312	103020	188150	168090	168680	114330	148620	139920	104560	191150	332990	201410	152880	214150	236400	249210	166310
215	E9PSK7	E9PSK7		Mapk8ip3	sp|E9PSK7|JIP3_RAT C-Jun-amino-terminal kinase-interacting protein 3 OS=Rattus norvegicus OX=10116 GN=Mapk8ip3 PE=1 SV=2	6.7	145.65	410100	539320	719520	400290	435590	432390	418340	417660	629920	479600	445530	400490	473640	454800	384420	396590
216	E9PSL7-3;E9PSL7;E9PSL7-2	E9PSL7-3;E9PSL7;E9PSL7-2		Cit	sp|E9PSL7-3|CTRO_RAT Isoform 3 of Citron rho-interacting kinase OS=Rattus norvegicus OX=10116 GN=Cit;sp|E9PSL7|CTRO_RAT Citron rho-interacting kinase OS=Rattus norvegicus OX=10116 GN=Cit PE=1 SV=1;sp|E9PSL7-2|CTRO_RAT Isoform 2 of Citron rho-interacting ki	1.1	237	0	508490	612770	0	309490	0	353240	0	401890	0	0	0	0	0	0	0
217	E9PT37	E9PT37	RNA-binding protein 20	Rbm20	sp|E9PT37|RBM20_RAT RNA-binding protein 20 OS=Rattus norvegicus OX=10116 GN=Rbm20 PE=1 SV=1	18.2	130.76	0	0	0	0	0	0	0	0	494010	951980	650000	620870	733170	738300	825040	672210
218	E9PT87	E9PT87	Myosin light chain kinase 3	Mylk3	sp|E9PT87|MYLK3_RAT Myosin light chain kinase 3 OS=Rattus norvegicus OX=10116 GN=Mylk3 PE=1 SV=1	63.7	85.54	3953700	4927100	6764600	3743200	3120400	3372000	3932300	3930600	3628600	5337100	4780400	3967000	3737100	4576400	4654400	4151200
219	E9PU28	E9PU28	Inosine-5-monophosphate dehydrogenase 2	Impdh2	sp|E9PU28|IMDH2_RAT Inosine-5-monophosphate dehydrogenase 2 OS=Rattus norvegicus OX=10116 GN=Impdh2 PE=1 SV=1	40.3	55.814	237630	169950	468700	244620	260520	206860	197280	179120	268110	147360	127040	227930	204900	311810	230280	253560
220	F1LM93	F1LM93	Tyrosine-protein kinase Yes	Yes1	sp|F1LM93|YES_RAT Tyrosine-protein kinase Yes OS=Rattus norvegicus OX=10116 GN=Yes1 PE=1 SV=1	21.6	60.613	113240	0	0	112420	105160	104350	98447	90847	46538	77124	0	0	144250	66357	171900	99532
221	F1LMZ8	F1LMZ8	26S proteasome non-ATPase regulatory subunit 11	Psmd11	sp|F1LMZ8|PSD11_RAT 26S proteasome non-ATPase regulatory subunit 11 OS=Rattus norvegicus OX=10116 GN=Psmd11 PE=1 SV=2	66.6	47.463	2166800	2710600	2779600	2031300	2074700	2109600	2341800	2094600	2019500	3057900	2166900	2146400	2302300	2520400	2228400	2130100
222	F1LNI5	F1LNI5	Protein phosphatase 1G	Ppm1g	sp|F1LNI5|PPM1G_RAT Protein phosphatase 1G OS=Rattus norvegicus OX=10116 GN=Ppm1g PE=1 SV=2	20.5	58.742	491880	820140	652650	549900	493950	664450	536460	754700	523790	987180	661090	508530	771550	852320	721150	565960
223	F1LNJ2	F1LNJ2	U5 small nuclear ribonucleoprotein 200 kDa helicase	Snrnp200	sp|F1LNJ2|U520_RAT U5 small nuclear ribonucleoprotein 200 kDa helicase OS=Rattus norvegicus OX=10116 GN=Snrnp200 PE=1 SV=1	24.1	244.87	1320400	1202000	1413500	1238700	1157600	1166800	1114000	1172500	1111400	1881800	1495700	1629500	1627500	1458200	1690700	1341000
224	F1LP64-2;F1LP64	F1LP64-2;F1LP64	E3 ubiquitin-protein ligase TRIP12	Trip12	sp|F1LP64-2|TRIPC_RAT Isoform 2 of E3 ubiquitin-protein ligase TRIP12 OS=Rattus norvegicus OX=10116 GN=Trip12;sp|F1LP64|TRIPC_RAT E3 ubiquitin-protein ligase TRIP12 OS=Rattus norvegicus OX=10116 GN=Trip12 PE=1 SV=1	8.4	218.2	1161000	1612400	1761100	1079600	721480	958610	1278700	1053700	1182800	3100900	1390900	738000	1433300	1775000	1712400	1197400
225	F1LP90	F1LP90	Misshapen-like kinase 1	Mink1	sp|F1LP90|MINK1_RAT Misshapen-like kinase 1 OS=Rattus norvegicus OX=10116 GN=Mink1 PE=1 SV=2	1.5	150.38	86457	81183	0	80987	76420	84421	31957	66741	0	0	81789	71133	87104	60542	88110	77667
226	F1LPQ2	F1LPQ2	Activating signal cointegrator 1 complex subunit 3	Ascc3	sp|F1LPQ2|ASCC3_RAT Activating signal cointegrator 1 complex subunit 3 OS=Rattus norvegicus OX=10116 GN=Ascc3 PE=3 SV=1	1.5	250.22	0	0	0	0	0	0	0	0	0	0	0	0	0	0	0	47217
227	F1LQ48;F1LQ48-2	F1LQ48;F1LQ48-2		Hnrnpl	sp|F1LQ48|HNRPL_RAT Heterogeneous nuclear ribonucleoprotein L OS=Rattus norvegicus OX=10116 GN=Hnrnpl PE=1 SV=2;sp|F1LQ48-2|HNRPL_RAT Isoform 2 of Heterogeneous nuclear ribonucleoprotein L OS=Rattus norvegicus OX=10116 GN=Hnrnpl	64.8	67.902	3281100	4063900	1656900	3545100	3119200	3487800	3674500	2893500	3774000	5647300	4330600	4046600	4601400	3988500	5056300	3942300
228	F1LR10	F1LR10		Lima1	sp|F1LR10|LIMA1_RAT LIM domain and actin-binding protein 1 OS=Rattus norvegicus OX=10116 GN=Lima1 PE=1 SV=2	7.4	83.796	118820	192980	293810	98504	86677	103840	176400	114730	156250	193910	121570	95606	151070	124320	122230	87822
229	F1LRS8	F1LRS8	CD2-associated protein	Cd2ap	sp|F1LRS8|CD2AP_RAT CD2-associated protein OS=Rattus norvegicus OX=10116 GN=Cd2ap PE=1 SV=2	9.7	70.49	132450	108740	197050	155550	122530	140280	175850	121460	97156	159540	148880	139760	157740	112970	157440	128520
230	F1LTR1	F1LTR1		Wdr26	sp|F1LTR1|WDR26_RAT WD repeat-containing protein 26 OS=Rattus norvegicus OX=10116 GN=Wdr26 PE=3 SV=2	8.4	58.49	115090	79303	0	0	124070	144340	0	102230	131930	183600	130410	145120	125370	211490	144020	125630
231	F1LU71	F1LU71		Auh	sp|F1LU71|AUHM_RAT Methylglutaconyl-CoA hydratase, mitochondrial OS=Rattus norvegicus OX=10116 GN=Auh PE=1 SV=2	50.5	33.341	1301800	1527400	1057800	1340100	1385800	1508300	1524200	1200000	1225800	1213600	1312000	1014200	1062600	1109200	1090200	1027200
232	F1LYQ8	F1LYQ8	FERM, RhoGEF and pleckstrin domain-containing protein 1	Farp1	sp|F1LYQ8|FARP1_RAT FERM, ARHGEF and pleckstrin domain-containing protein 1 OS=Rattus norvegicus OX=10116 GN=Farp1 PE=1 SV=2	4.8	118.84	243720	279490	654500	241270	0	231590	233700	201600	229790	0	510090	259270	339570	455830	397410	237420
233	F1M0Z1	F1M0Z1		Trio	sp|F1M0Z1|TRIO_RAT Triple functional domain protein OS=Rattus norvegicus OX=10116 GN=Trio PE=1 SV=4	2.7	347.86	694970	0	853380	546680	414100	592350	529330	0	697780	816880	760470	363970	704860	582010	572600	560430
234	F1M386	F1M386	Rap guanine nucleotide exchange factor 2	Rapgef2	sp|F1M386|RPGF2_RAT Rap guanine nucleotide exchange factor 2 OS=Rattus norvegicus OX=10116 GN=Rapgef2 PE=1 SV=2	2.4	166.39	0	0	0	0	18886	0	0	0	0	0	0	0	0	0	0	0
235	F1M3G7	F1M3G7		Akap13	sp|F1M3G7|AKP13_RAT A-kinase anchor protein 13 OS=Rattus norvegicus OX=10116 GN=Akap13 PE=1 SV=2	6.5	301.4	151450	183880	197450	157690	123100	122020	142780	147500	163050	222440	108320	93180	139170	197750	128620	119210
236	F1M3L7	F1M3L7	Epidermal growth factor receptor kinase substrate 8	Eps8	sp|F1M3L7|EPS8_RAT Epidermal growth factor receptor kinase substrate 8 OS=Rattus norvegicus OX=10116 GN=Eps8 PE=1 SV=2	3.5	91.927	0	0	0	0	0	0	0	0	0	0	0	0	0	0	0	106380
237	F1M625	F1M625	Ubiquitin carboxyl-terminal hydrolase	Usp46	sp|F1M625|UBP46_RAT Ubiquitin carboxyl-terminal hydrolase 46 OS=Rattus norvegicus OX=10116 GN=Usp46 PE=1 SV=2	7.1	42.415	0	0	0	0	0	0	0	0	0	0	69749	0	0	0	0	0
238	F1M775	F1M775		Diaph1	sp|F1M775|DIAP1_RAT Protein diaphanous homolog 1 OS=Rattus norvegicus OX=10116 GN=Diaph1 PE=1 SV=3	7.8	140.3	292520	231110	0	182430	109860	203330	169020	154940	158990	0	0	0	96250	128180	0	133230
239	F1MA98	F1MA98	Nucleoprotein TPR	Tpr	sp|F1MA98|TPR_RAT Nucleoprotein TPR OS=Rattus norvegicus OX=10116 GN=Tpr PE=1 SV=1	23.8	267.3	1269700	1692000	2975400	1322900	1369100	1365900	1342000	1271300	1425100	2443400	1594500	1459000	1698000	1813600	1725800	1399600
240	F2Z3T4	F2Z3T4	Muscleblind-like protein 2	Mbnl2	sp|F2Z3T4|MBNL2_RAT Muscleblind-like protein 2 OS=Rattus norvegicus OX=10116 GN=Mbnl2 PE=1 SV=1	16.4	40.156	144550	151260	467460	152360	145630	123970	136970	170940	113440	167320	144180	132490	176170	0	146900	140900
241	G3V6S8	G3V6S8	Serine/arginine-rich splicing factor 6	Srsf6	sp|G3V6S8|SRSF6_RAT Serine/arginine-rich splicing factor 6 OS=Rattus norvegicus OX=10116 GN=Srsf6 PE=1 SV=1	10.6	39.025	74552	156440	322990	103260	88663	85668	83330	0	102280	170750	75760	108040	121720	127200	128410	111250
242	G3V6U9	G3V6U9		LOC100910833	sp|G3V6U9|SETD3_RAT Actin-histidine N-methyltransferase OS=Rattus norvegicus OX=10116 GN=Setd3 PE=1 SV=1	13.4	67.42	196530	218570	0	175890	199660	190090	174530	174270	247850	269010	201160	163670	209870	178040	200510	161410
243	G3V7P1	G3V7P1	Syntaxin-12	Stx12	sp|G3V7P1|STX12_RAT Syntaxin-12 OS=Rattus norvegicus OX=10116 GN=Stx12 PE=1 SV=1	51.8	31.187	935320	908690	431580	1106400	935610	859820	810020	866920	594510	1446200	990630	1035400	1053900	1083700	945130	958670
244	G3V7Q0	G3V7Q0		Dennd5a	sp|G3V7Q0|DEN5A_RAT DENN domain-containing protein 5A OS=Rattus norvegicus OX=10116 GN=Dennd5a PE=2 SV=1	2.6	146.64	245660	0	42286	38519	114460	0	95668	118790	139900	88223	44532	0	0	111790	0	0
245	G3V7W1-2;G3V7W1	G3V7W1-2;G3V7W1		Pdcd6	sp|G3V7W1-2|PDCD6_RAT Isoform 2 of Programmed cell death protein 6 OS=Rattus norvegicus OX=10116 GN=Pdcd6;sp|G3V7W1|PDCD6_RAT Programmed cell death protein 6 OS=Rattus norvegicus OX=10116 GN=Pdcd6 PE=2 SV=1	55.6	21.7	479870	447100	300230	531870	520580	515490	445040	534670	762440	660720	883680	771050	768770	655790	715880	771110
246	G3V928	G3V928		Lrp1	sp|G3V928|LRP1_RAT Prolow-density lipoprotein receptor-related protein 1 OS=Rattus norvegicus OX=10116 GN=Lrp1 PE=1 SV=1	4.1	504.88	955000	1047900	2606700	741650	668530	667950	1150400	955640	1207000	1818200	1229100	953550	1195100	1237900	1395900	1022500
247	G3V9D0	G3V9D0	Protein O-glucosyltransferase 1	Poglut1	sp|G3V9D0|PGLT1_RAT Protein O-glucosyltransferase 1 OS=Rattus norvegicus OX=10116 GN=Poglut1 PE=3 SV=1	10.2	46.509	0	25402	34257	0	0	60064	70856	0	66129	0	0	0	125140	105630	56104	70536
248	G3V9R8	G3V9R8	Heterogeneous nuclear ribonucleoprotein C	Hnrnpc	sp|G3V9R8|HNRPC_RAT Heterogeneous nuclear ribonucleoprotein C OS=Rattus norvegicus OX=10116 GN=Hnrnpc PE=1 SV=2	38.9	32.857	1716600	1563200	3833500	1581400	1234000	1416900	1537600	1444400	1940200	2234800	2121200	2100200	2354300	1936000	1932000	1705900
249	H1UBN0;Q5BJS7	H1UBN0;Q5BJS7	Copine-9	Cpne7;Cpne9	sp|H1UBN0|CPNE7_RAT Copine-7 OS=Rattus norvegicus OX=10116 GN=Cpne7 PE=1 SV=1;sp|Q5BJS7|CPNE9_RAT Copine-9 OS=Rattus norvegicus OX=10116 GN=Cpne9 PE=2 SV=1	3.6	61.977	496340	455060	0	470350	463720	476890	450570	474990	401320	306900	591440	554300	852470	430720	544520	501410
250	I6L9G5	I6L9G5		Rcn3	sp|I6L9G5|RCN3_RAT Reticulocalbin-3 OS=Rattus norvegicus OX=10116 GN=Rcn3 PE=1 SV=1	29.9	37.941	245850	166520	390150	212880	204110	193550	339250	307610	212850	198190	267710	235500	247700	160410	213990	230470
251	M0R7Z9	M0R7Z9	Perilipin-5	Plin5	sp|M0R7Z9|PLIN5_RAT Perilipin-5 OS=Rattus norvegicus OX=10116 GN=Plin5 PE=1 SV=1	43.4	51.804	330860	476790	1152200	476560	362080	435230	298400	332290	194030	454080	531270	471750	452230	454480	406050	417080
252	M0RC99	M0RC99	Ras-related protein Rab-5A	Rab5a	sp|M0RC99|RAB5A_RAT Ras-related protein Rab-5A OS=Rattus norvegicus OX=10116 GN=Rab5a PE=2 SV=1	47	23.624	611820	540790	560770	594380	905490	773430	610100	804100	1125200	459230	725490	808310	680590	594400	716700	852130
253	M0RD54	M0RD54		RGD1564899	sp|M0RD54|CEFIP_RAT Cardiac-enriched FHL2-interacting protein OS=Rattus norvegicus OX=10116 GN=CEFIP PE=3 SV=2	14.1	155.41	655430	819380	1276000	651260	529530	613960	609000	700790	525510	439010	639490	459570	695580	487370	803400	528540
254	O08557	O08557	N(G),N(G)-dimethylarginine dimethylaminohydrolase 1	Ddah1	sp|O08557|DDAH1_RAT N(G),N(G)-dimethylarginine dimethylaminohydrolase 1 OS=Rattus norvegicus OX=10116 GN=Ddah1 PE=1 SV=3	41.4	31.426	528350	475040	651680	515790	633440	480630	596540	696370	533670	768810	560280	513450	589510	530580	601170	608810
255	O08587	O08587	Nuclear pore complex protein Nup50	Nup50	sp|O08587|NUP50_RAT Nuclear pore complex protein Nup50 OS=Rattus norvegicus OX=10116 GN=Nup50 PE=2 SV=2	8.6	49.817	82335	81123	0	0	81063	0	0	81989	0	0	64857	67613	81834	0	83414	74467
256	O08589	O08589	Phospholemman	Fxyd1	sp|O08589|PLM_RAT Phospholemman OS=Rattus norvegicus OX=10116 GN=Fxyd1 PE=1 SV=2	18.5	10.365	0	0	0	0	0	0	0	0	0	0	0	0	0	0	0	687640
257	O08590	O08590	Membrane primary amine oxidase	Aoc3	sp|O08590|AOC3_RAT Membrane primary amine oxidase OS=Rattus norvegicus OX=10116 GN=Aoc3 PE=1 SV=4	18.2	84.98	248700	377560	195600	309920	273920	278710	453870	295230	340460	514760	603850	346580	324560	516600	284800	343850
258	O08618	O08618	Phosphoribosyl pyrophosphate synthase-associated protein 2	Prpsap2	sp|O08618|KPRB_RAT Phosphoribosyl pyrophosphate synthase-associated protein 2 OS=Rattus norvegicus OX=10116 GN=Prpsap2 PE=1 SV=1	37.9	40.866	752340	707960	866070	688640	635140	765000	677060	603270	564450	477310	705590	455390	714030	623940	669030	612450
259	O08619	O08619	Coagulation factor XIII A chain	F13a1	sp|O08619|F13A_RAT Coagulation factor XIII A chain OS=Rattus norvegicus OX=10116 GN=F13a1 PE=2 SV=3	16.1	82.658	375620	267130	249030	337990	360590	273390	292840	375610	241630	358310	379190	117320	274520	187220	211580	317740
260	O08623;O08623-2;O08623-3	O08623;O08623-2;O08623-3	Sequestosome-1	Sqstm1	sp|O08623|SQSTM_RAT Sequestosome-1 OS=Rattus norvegicus OX=10116 GN=Sqstm1 PE=1 SV=1;sp|O08623-2|SQSTM_RAT Isoform 2 of Sequestosome-1 OS=Rattus norvegicus OX=10116 GN=Sqstm1;sp|O08623-3|SQSTM_RAT Isoform 3 of Sequestosome-1 OS=Rattus norvegicus OX=10116 G	20.5	47.681	100580	148260	144950	113330	110970	85895	104330	54387	84439	140320	59372	48438	54270	57218	79930	55186
261	O08629	O08629	Transcription intermediary factor 1-beta	Trim28	sp|O08629|TIF1B_RAT Transcription intermediary factor 1-beta OS=Rattus norvegicus OX=10116 GN=Trim28 PE=1 SV=2	43.2	88.955	1136200	1352400	1701500	1097400	980330	1067300	1240500	1014100	1257200	2419700	1332200	1392000	1531600	1516500	1654400	1201900
262	O08651	O08651	D-3-phosphoglycerate dehydrogenase	Phgdh	sp|O08651|SERA_RAT D-3-phosphoglycerate dehydrogenase OS=Rattus norvegicus OX=10116 GN=Phgdh PE=1 SV=3	13.5	56.493	0	0	0	0	0	0	0	0	0	39097	0	0	0	0	2712.6	0
263	O08653	O08653	Telomerase protein component 1	Tep1	sp|O08653|TEP1_RAT Telomerase protein component 1 OS=Rattus norvegicus OX=10116 GN=Tep1 PE=1 SV=1	1.7	291.7	0	0	0	0	0	0	0	0	0	0	0	0	0	61308	0	0
264	O08658	O08658	Nuclear pore complex protein Nup88	Nup88	sp|O08658|NUP88_RAT Nuclear pore complex protein Nup88 OS=Rattus norvegicus OX=10116 GN=Nup88 PE=1 SV=1	6.5	83.584	40766	0	0	69298	53415	0	0	0	0	0	0	0	45869	0	19346	0
265	O08662	O08662	Phosphatidylinositol 4-kinase alpha	Pi4ka	sp|O08662|PI4KA_RAT Phosphatidylinositol 4-kinase alpha OS=Rattus norvegicus OX=10116 GN=Pi4ka PE=1 SV=2	6.1	236.92	0	63466	0	0	0	84613	64424	31344	164090	186570	130650	90194	141560	162250	132010	131200
266	O08679;O08678	O08679;O08678	Serine/threonine-protein kinase MARK2;Serine/threonine-protein kinase MARK1	Mark2;Mark1	sp|O08679|MARK2_RAT Serine/threonine-protein kinase MARK2 OS=Rattus norvegicus OX=10116 GN=Mark2 PE=1 SV=1;sp|O08678|MARK1_RAT Serine/threonine-protein kinase MARK1 OS=Rattus norvegicus OX=10116 GN=Mark1 PE=1 SV=1	13.6	80.871	120320	230640	528210	410200	148750	192800	139020	140130	193720	307450	201020	186880	231900	193790	249960	147610
267	O08697	O08697	ADP-ribosylation factor-like protein 2	Arl2	sp|O08697|ARL2_RAT ADP-ribosylation factor-like protein 2 OS=Rattus norvegicus OX=10116 GN=Arl2 PE=1 SV=1	29.9	20.836	0	166080	167140	144930	86557	160990	112670	285240	162330	218450	118910	0	0	164230	168890	142150
268	O08700	O08700	Vacuolar protein sorting-associated protein 45	Vps45	sp|O08700|VPS45_RAT Vacuolar protein sorting-associated protein 45 OS=Rattus norvegicus OX=10116 GN=Vps45 PE=1 SV=1	16.1	64.893	137790	238940	164710	141930	111940	180770	178600	111320	127370	257210	166480	127060	158920	244410	151910	117120
269	O08730	O08730	Glycogenin-1	Gyg1	sp|O08730|GLYG_RAT Glycogenin-1 OS=Rattus norvegicus OX=10116 GN=Gyg1 PE=2 SV=4	49.5	37.378	2547300	3188000	4528500	2358400	2946100	2608900	2530200	2536200	2475100	3219300	2493200	2291100	2583300	2422600	2913100	2211800
270	O08776-4;O08776;O08776-2;O08776-3	O08776-4;O08776	NADH dehydrogenase [ubiquinone] 1 alpha subcomplex assembly factor 3	Ndufaf3	sp|O08776-4|NDUF3_RAT Isoform 4 of NADH dehydrogenase [ubiquinone] 1 alpha subcomplex assembly factor 3 OS=Rattus norvegicus OX=10116 GN=Ndufaf3;sp|O08776|NDUF3_RAT NADH dehydrogenase [ubiquinone] 1 alpha subcomplex assembly factor 3 OS=Rattus norvegicus O	57	19.863	647310	866910	1266700	695210	650960	845810	738570	637840	1119000	862610	800280	818210	867130	780850	727850	652260
271	O08815	O08815	STE20-like serine/threonine-protein kinase	Slk	sp|O08815|SLK_RAT STE20-like serine/threonine-protein kinase OS=Rattus norvegicus OX=10116 GN=Slk PE=1 SV=1	14.1	137.89	1727600	2339400	3998600	1664800	1681800	2143700	1776400	1947900	2003200	2858600	2385000	1888200	2274600	1849800	2427100	1690400
272	O08816	O08816	Neural Wiskott-Aldrich syndrome protein	Wasl	sp|O08816|WASL_RAT Neural Wiskott-Aldrich syndrome protein OS=Rattus norvegicus OX=10116 GN=Wasl PE=1 SV=2	17.8	54.325	51581	108190	104050	52907	0	69266	29839	54918	67115	150900	70337	33595	60236	119290	106480	39793
273	O08836	O08836	Immunoglobulin-binding protein 1	Igbp1	sp|O08836|IGBP1_RAT Immunoglobulin-binding protein 1 OS=Rattus norvegicus OX=10116 GN=Igbp1 PE=2 SV=2	22.4	39.135	205710	184990	556010	131540	177950	261620	177800	203790	134850	158100	114740	146980	145510	145410	96781	130660
274	O08837	O08837	Cell division cycle 5-like protein	Cdc5l	sp|O08837|CDC5L_RAT Cell division cycle 5-like protein OS=Rattus norvegicus OX=10116 GN=Cdc5l PE=1 SV=2	26.6	92.216	573540	662210	1263500	500020	478240	529590	584770	483540	444360	1091900	632560	653450	722730	638520	713290	555980
275	O08839-3;O08839-6;O08839-5;O08839-2;O08839;O08839-4	O08839-3;O08839-6;O08839-5;O08839-2;O08839;O08839-4	Myc box-dependent-interacting protein 1	Bin1	sp|O08839-3|BIN1_RAT Isoform AMPH2-3 of Myc box-dependent-interacting protein 1 OS=Rattus norvegicus OX=10116 GN=Bin1;sp|O08839-6|BIN1_RAT Isoform AMPH2-6 of Myc box-dependent-interacting protein 1 OS=Rattus norvegicus OX=10116 GN=Bin1;sp|O08839-5|BIN1_RAT	10.2	37.377	0	0	0	0	0	0	53782	64359	68689	66062	0	0	0	0	0	0
276	O08984	O08984	Lamin-B receptor	Lbr	sp|O08984|LBR_RAT Delta(14)-sterol reductase LBR OS=Rattus norvegicus OX=10116 GN=Lbr PE=1 SV=1	17.7	70.723	378140	412150	293410	351810	303940	347940	356350	313020	498380	772210	658480	594480	617110	593220	515330	460660
277	O09175	O09175	Aminopeptidase B	Rnpep	sp|O09175|AMPB_RAT Aminopeptidase B OS=Rattus norvegicus OX=10116 GN=Rnpep PE=1 SV=2	35.4	72.619	1262200	1318500	2209100	1367600	1072400	1170900	1275800	1085800	1151700	1225900	1252000	1349300	1509800	1083100	1239500	1152700
278	O09178;P10759	O09178	AMP deaminase 3	Ampd3	sp|O09178|AMPD3_RAT AMP deaminase 3 OS=Rattus norvegicus OX=10116 GN=Ampd3 PE=1 SV=2	17.4	88.482	206270	396830	217660	219360	223500	234100	259940	292540	370240	413510	251880	366010	312570	376660	275400	344010
279	O35077	O35077	Glycerol-3-phosphate dehydrogenase [NAD(+)], cytoplasmic	Gpd1	sp|O35077|GPDA_RAT Glycerol-3-phosphate dehydrogenase [NAD(+)], cytoplasmic OS=Rattus norvegicus OX=10116 GN=Gpd1 PE=1 SV=4	68.8	37.452	2178200	2682900	2050000	2160200	2253000	2122700	2178000	2159800	2205800	2740600	2083000	1889200	2269000	2525900	2516500	2014700
280	O35092	O35092	Mitochondrial import inner membrane translocase subunit Tim17-A	Timm17a	sp|O35092|TI17A_RAT Mitochondrial import inner membrane translocase subunit Tim17-A OS=Rattus norvegicus OX=10116 GN=Timm17a PE=2 SV=1	45.6	18.037	160610	319650	84102	145990	109220	181320	156110	137160	273040	250950	105800	175680	167440	301630	212520	126970
281	O35093	O35093	Mitochondrial import inner membrane translocase subunit Tim23	Timm23	sp|O35093|TIM23_RAT Mitochondrial import inner membrane translocase subunit Tim23 OS=Rattus norvegicus OX=10116 GN=Timm23 PE=2 SV=1	48.3	21.907	968940	912260	954210	902170	686560	1087100	785860	765410	332110	1246700	986490	1088800	764830	1492100	1117600	801430
282	O35094	O35094	Mitochondrial import inner membrane translocase subunit TIM44	Timm44	sp|O35094|TIM44_RAT Mitochondrial import inner membrane translocase subunit TIM44 OS=Rattus norvegicus OX=10116 GN=Timm44 PE=1 SV=1	40.2	51.06	1684500	2388000	2620100	1659200	1557700	1739400	1538400	1673500	1485400	1973800	1730200	1563000	1615400	1763300	1755500	1438100
283	O35112	O35112	CD166 antigen	Alcam	sp|O35112|CD166_RAT CD166 antigen OS=Rattus norvegicus OX=10116 GN=Alcam PE=1 SV=1	3.1	65.021	0	0	0	0	0	0	0	0	0	0	0	0	0	0	0	40744
284	O35115	O35115	Four and a half LIM domains protein 2	Fhl2	sp|O35115|FHL2_RAT Four and a half LIM domains protein 2 OS=Rattus norvegicus OX=10116 GN=Fhl2 PE=1 SV=1	82.1	32.086	2460900	3554600	2749600	2723000	2142700	3334500	2924500	2197500	9552400	8535500	9071200	5395300	6147300	6315900	7817100	7402900
285	O35142	O35142	Coatomer subunit beta	Copb2	sp|O35142|COPB2_RAT Coatomer subunit beta OS=Rattus norvegicus OX=10116 GN=Copb2 PE=1 SV=3	31.2	102.55	1283600	1520000	2421000	1183200	1109500	1179500	1274500	1065700	1288400	1720700	1292700	1236800	1337500	1505300	1327000	1242600
286	O35162	O35162	Heat shock 70 kDa protein 13	Hspa13	sp|O35162|HSP13_RAT Heat shock 70 kDa protein 13 OS=Rattus norvegicus OX=10116 GN=Hspa13 PE=1 SV=2	11	51.795	0	732990	0	0	722620	541590	0	767130	758150	744930	846360	967270	1349600	773560	764920	886810
287	O35165	O35165	Golgi SNAP receptor complex member 2	Gosr2	sp|O35165|GOSR2_RAT Golgi SNAP receptor complex member 2 OS=Rattus norvegicus OX=10116 GN=Gosr2 PE=1 SV=2	17.5	24.607	0	0	0	0	0	0	0	0	0	0	0	0	117610	157320	110220	105380
288	O35217	O35217	Multiple inositol polyphosphate phosphatase 1	Minpp1	sp|O35217|MINP1_RAT Multiple inositol polyphosphate phosphatase 1 OS=Rattus norvegicus OX=10116 GN=Minpp1 PE=1 SV=3	18.3	54.589	125790	151120	94002	172780	206100	238420	197490	201770	194580	122580	168120	124210	146920	153650	99935	197980
289	O35244	O35244	Peroxiredoxin-6	Prdx6	sp|O35244|PRDX6_RAT Peroxiredoxin-6 OS=Rattus norvegicus OX=10116 GN=Prdx6 PE=1 SV=3	84.4	24.818	8782600	8700100	13966000	8980400	8895600	8279800	9377500	8978300	8219700	6882100	10192000	8985300	8613300	7245300	8979700	9311700
290	O35263	O35263	Platelet-activating factor acetylhydrolase IB subunit gamma	Pafah1b3	sp|O35263|PA1B3_RAT Platelet-activating factor acetylhydrolase IB subunit alpha1 OS=Rattus norvegicus OX=10116 GN=Pafah1b3 PE=1 SV=1	21.6	25.863	0	0	0	0	0	0	114380	0	0	0	0	0	83965	0	0	0
291	O35264	O35264	Platelet-activating factor acetylhydrolase IB subunit beta	Pafah1b2	sp|O35264|PA1B2_RAT Platelet-activating factor acetylhydrolase IB subunit alpha2 OS=Rattus norvegicus OX=10116 GN=Pafah1b2 PE=1 SV=1	40.6	25.581	546550	354680	97092	526230	487870	460550	472030	429200	407720	328580	427620	572170	648230	284620	379450	593810
292	O35274	O35274	Neurabin-2	Ppp1r9b	sp|O35274|NEB2_RAT Neurabin-2 OS=Rattus norvegicus OX=10116 GN=Ppp1r9b PE=1 SV=1	10.6	89.645	0	0	49030	0	0	0	0	0	0	31930	0	0	0	0	25459	0
293	O35303-5;O35303-4;O35303;O35303-3	O35303-5;O35303-4;O35303;O35303-3	Dynamin-1-like protein	Dnm1l	sp|O35303-5|DNM1L_RAT Isoform 5 of Dynamin-1-like protein OS=Rattus norvegicus OX=10116 GN=Dnm1l;sp|O35303-4|DNM1L_RAT Isoform 4 of Dynamin-1-like protein OS=Rattus norvegicus OX=10116 GN=Dnm1l;sp|O35303|DNM1L_RAT Dynamin-1-like protein OS=Rattus norvegicu	62.1	82.539	0	0	0	0	0	0	0	0	0	0	0	0	0	0	0	79293
294	O35303-2	O35303-2	Dynamin-1-like protein	Dnm1l	sp|O35303-2|DNM1L_RAT Isoform 2 of Dynamin-1-like protein OS=Rattus norvegicus OX=10116 GN=Dnm1l	63.4	79.95	5599300	6674500	5954800	5286000	4594300	5088100	5494200	5795300	5109400	6131600	6132300	5137700	5476200	6042500	5864700	5026900
295	O35303-6	O35303-6	Dynamin-1-like protein	Dnm1l	sp|O35303-6|DNM1L_RAT Isoform 6 of Dynamin-1-like protein OS=Rattus norvegicus OX=10116 GN=Dnm1l	63.2	80.103	0	0	0	0	0	0	0	0	0	0	0	0	0	0	0	12478
296	O35331	O35331	Pyridoxal kinase	Pdxk	sp|O35331|PDXK_RAT Pyridoxal kinase OS=Rattus norvegicus OX=10116 GN=Pdxk PE=1 SV=1	28.2	34.908	306910	411670	864400	314940	297360	307430	359410	225520	327580	396990	367640	328410	414970	440930	302960	294170
297	O35346;O35346-2	O35346;O35346-2	Focal adhesion kinase 1	Ptk2	sp|O35346|FAK1_RAT Focal adhesion kinase 1 OS=Rattus norvegicus OX=10116 GN=Ptk2 PE=1 SV=1;sp|O35346-2|FAK1_RAT Isoform 2 of Focal adhesion kinase 1 OS=Rattus norvegicus OX=10116 GN=Ptk2	11.8	119.72	433110	357310	705110	299790	277060	368750	395780	418520	312190	388970	478050	268390	288210	347530	360580	538550
298	O35413;O35413-2;P84109	O35413	Sorbin and SH3 domain-containing protein 2	Sorbs2	sp|O35413|SRBS2_RAT Sorbin and SH3 domain-containing protein 2 OS=Rattus norvegicus OX=10116 GN=Sorbs2 PE=1 SV=2	29.3	134.06	9428000	11354000	12263000	8331400	9235300	8482100	9564800	8123800	6955900	7980000	7092900	5896700	7867500	7403800	7623300	6225900
299	O35509;P62494	O35509;P62494	Ras-related protein Rab-11B;Ras-related protein Rab-11A	Rab11b;Rab11a	sp|O35509|RB11B_RAT Ras-related protein Rab-11B OS=Rattus norvegicus OX=10116 GN=Rab11b PE=1 SV=4;sp|P62494|RB11A_RAT Ras-related protein Rab-11A OS=Rattus norvegicus OX=10116 GN=Rab11a PE=1 SV=3	61.5	24.488	3355100	3887400	7792100	3399500	3312600	3509300	3344700	3396700	2706400	5286900	3925700	3902000	3550700	3925900	4123200	3524000
300	O35550	O35550	Rab GTPase-binding effector protein 1	Rabep1	sp|O35550|RABE1_RAT Rab GTPase-binding effector protein 1 OS=Rattus norvegicus OX=10116 GN=Rabep1 PE=1 SV=1	12.8	99.427	0	589420	376020	468560	345980	555540	342530	80962	191130	419950	134640	0	492200	330220	510160	135810
301	O35567	O35567	Bifunctional purine biosynthesis protein PURH;Phosphoribosylaminoimidazolecarboxamide formyltransferase;IMP cyclohydrolase	Atic	sp|O35567|PUR9_RAT Bifunctional purine biosynthesis protein ATIC OS=Rattus norvegicus OX=10116 GN=Atic PE=1 SV=2	69.9	64.208	5636500	7655600	7704500	5877600	5643300	6129600	6381300	5460200	6911500	7337700	6824100	6265300	6760400	7213700	6684000	6330900
302	O35568	O35568	EGF-containing fibulin-like extracellular matrix protein 1	Efemp1	sp|O35568|FBLN3_RAT EGF-containing fibulin-like extracellular matrix protein 1 OS=Rattus norvegicus OX=10116 GN=Efemp1 PE=1 SV=1	18.3	54.596	0	58911	105960	64971	0	44139	68997	119530	31137	0	26869	0	35483	0	40170	0
303	O35763	O35763	Moesin	Msn	sp|O35763|MOES_RAT Moesin OS=Rattus norvegicus OX=10116 GN=Msn PE=1 SV=3	69.8	67.738	10654000	11909000	16812000	10191000	10876000	10123000	10592000	9807200	10287000	11874000	9987200	9705700	10618000	12178000	11564000	9778000
304	O35777	O35777	Magnesium transporter protein 1	Magt1	sp|O35777|MAGT1_RAT Magnesium transporter protein 1 OS=Rattus norvegicus OX=10116 GN=Magt1 PE=2 SV=2	9	37.992	18155	0	0	21059	25671	0	19914	0	62501	32982	60198	0	51211	32841	28192	24170
305	O35783	O35783	Calumenin	Calu	sp|O35783|CALU_RAT Calumenin OS=Rattus norvegicus OX=10116 GN=Calu PE=1 SV=1	36.5	36.996	727370	398050	169900	524070	555620	596750	652010	605780	477550	324020	445890	495690	564620	373170	464060	517650
306	O35787	O35787	Kinesin-like protein KIF1C	Kif1c	sp|O35787|KIF1C_RAT Kinesin-like protein KIF1C OS=Rattus norvegicus OX=10116 GN=Kif1c PE=1 SV=1	5.6	122.33	0	273800	141730	0	0	285000	0	282260	207860	708450	0	0	175170	296350	0	249630
307	O35795;O35795-2	O35795;O35795-2	Ectonucleoside triphosphate diphosphohydrolase 2	Entpd2	sp|O35795|ENTP2_RAT Ectonucleoside triphosphate diphosphohydrolase 2 OS=Rattus norvegicus OX=10116 GN=Entpd2 PE=1 SV=1;sp|O35795-2|ENTP2_RAT Isoform 2 of Ectonucleoside triphosphate diphosphohydrolase 2 OS=Rattus norvegicus OX=10116 GN=Entpd2	6.5	54.389	114410	162510	134940	208480	182990	127000	172610	169020	259780	247910	270140	0	217180	179310	207900	74336
308	O35796	O35796	Complement component 1 Q subcomponent-binding protein, mitochondrial	C1qbp	sp|O35796|C1QBP_RAT Complement component 1 Q subcomponent-binding protein, mitochondrial OS=Rattus norvegicus OX=10116 GN=C1qbp PE=1 SV=2	63.4	30.997	5112500	5786300	8673100	5961300	6371400	6632300	5374300	6930600	4931600	5612700	6671900	7050400	5901200	4867000	5953100	6270400
309	O35814	O35814	Stress-induced-phosphoprotein 1	Stip1	sp|O35814|STIP1_RAT Stress-induced-phosphoprotein 1 OS=Rattus norvegicus OX=10116 GN=Stip1 PE=1 SV=1	60.6	62.569	5278000	6967200	6185400	5220800	5096500	5433400	5452200	5420100	5395100	6861100	5093600	4265500	5160400	6364400	5730100	4806400
310	O35820	O35820	2-deoxynucleoside 5-phosphate N-hydrolase 1	Dnph1	sp|O35820|DNPH1_RAT 2-deoxynucleoside 5-phosphate N-hydrolase 1 OS=Rattus norvegicus OX=10116 GN=Dnph1 PE=1 SV=1	16.6	17.781	0	0	302780	0	0	205570	200090	0	0	294900	99618	0	0	0	0	0
311	O35821	O35821	Myb-binding protein 1A	Mybbp1a	sp|O35821|MBB1A_RAT Myb-binding protein 1A OS=Rattus norvegicus OX=10116 GN=Mybbp1a PE=1 SV=2	19.5	152.28	483820	533420	576230	577780	361750	645750	444600	530530	447860	1060300	455320	599560	679980	801990	590000	617000
312	O35824	O35824	DnaJ homolog subfamily A member 2	Dnaja2	sp|O35824|DNJA2_RAT DnaJ homolog subfamily A member 2 OS=Rattus norvegicus OX=10116 GN=Dnaja2 PE=1 SV=1	53.9	45.765	924290	770720	2007000	998650	824660	1048700	897350	998120	945950	833040	889640	807850	777220	865930	855820	944710
313	O35828	O35828	Coronin-7	Coro7	sp|O35828|CORO7_RAT Coronin-7 OS=Rattus norvegicus OX=10116 GN=Coro7 PE=1 SV=2	24.1	100.78	268820	325700	770400	245260	305150	262070	236660	292500	242620	498570	547120	258760	327310	463340	380240	289180
314	O35854	O35854	Branched-chain-amino-acid aminotransferase, mitochondrial	Bcat2	sp|O35854|BCAT2_RAT Branched-chain-amino-acid aminotransferase, mitochondrial OS=Rattus norvegicus OX=10116 GN=Bcat2 PE=1 SV=1	41.7	44.275	4107300	5642600	4452400	4820100	5656400	5081100	5696600	4856600	5180300	3322300	3228400	2598400	2663200	2778300	2892500	2819800
315	O35878	O35878	Heat shock protein beta-2	Hspb2	sp|O35878|HSPB2_RAT Heat shock protein beta-2 OS=Rattus norvegicus OX=10116 GN=Hspb2 PE=3 SV=1	74.2	20.346	5826900	6550900	3782500	6049800	7456300	6869500	6210700	6155900	6069400	5309200	6281100	6367500	5537500	6338700	5675500	6493200
316	O35889;O35889-2	O35889;O35889-2	Afadin	Mllt4	sp|O35889|AFAD_RAT Afadin OS=Rattus norvegicus OX=10116 GN=Afdn PE=1 SV=1;sp|O35889-2|AFAD_RAT Isoform 2 of Afadin OS=Rattus norvegicus OX=10116 GN=Afdn	9.8	207.68	549950	953040	2142300	702390	635510	652460	851590	640060	808130	1368400	758800	836840	915700	1061800	894800	685590
317	O35952	O35952	Hydroxyacylglutathione hydrolase, mitochondrial	Hagh	sp|O35952|GLO2_RAT Hydroxyacylglutathione hydrolase, mitochondrial OS=Rattus norvegicus OX=10116 GN=Hagh PE=1 SV=2	37.2	34.109	822300	1352900	2047000	766510	737480	822350	804760	664350	480600	970810	825570	534020	683430	1196400	712860	550160
318	O35952-2	O35952-2	Hydroxyacylglutathione hydrolase, mitochondrial	Hagh	sp|O35952-2|GLO2_RAT Isoform 2 of Hydroxyacylglutathione hydrolase, mitochondrial OS=Rattus norvegicus OX=10116 GN=Hagh	41.2	28.896	0	0	0	0	0	0	0	118990	0	0	0	0	0	0	0	0
319	O35964;O35179	O35964	Endophilin-A2	Sh3gl1	sp|O35964|SH3G1_RAT Endophilin-A2 OS=Rattus norvegicus OX=10116 GN=Sh3gl1 PE=1 SV=1	42.1	41.492	328120	430110	523280	307750	335310	338060	359260	391410	302760	397980	347040	272590	344550	381070	392600	280760
320	O35987	O35987	NSFL1 cofactor p47	Nsfl1c	sp|O35987|NSF1C_RAT NSFL1 cofactor p47 OS=Rattus norvegicus OX=10116 GN=Nsfl1c PE=1 SV=1	50.8	40.679	2731400	3139200	5661500	2573800	2797400	2834200	2888700	2435400	2358500	3077300	2596300	2405500	2667000	2756400	2900300	2562400
321	O54715	O54715	V-type proton ATPase subunit S1	Atp6ap1	sp|O54715|VAS1_RAT V-type proton ATPase subunit S1 OS=Rattus norvegicus OX=10116 GN=Atp6ap1 PE=1 SV=1	7.6	51.122	0	0	0	0	0	0	0	0	0	0	0	0	0	0	0	37310
322	O54748	O54748	Serine/threonine-protein kinase 3;Serine/threonine-protein kinase 3 36kDa subunit;Serine/threonine-protein kinase 3 20kDa subunit	Stk3	sp|O54748|STK3_RAT Serine/threonine-protein kinase 3 OS=Rattus norvegicus OX=10116 GN=Stk3 PE=1 SV=1	6.5	56.121	27306	65795	140770	0	43837	28646	53226	43029	30290	15253	0	0	0	0	33186	0
323	O54772	O54772	SWI/SNF-related matrix-associated actin-dependent regulator of chromatin subfamily D member 2	Smarcd2	sp|O54772|SMRD2_RAT SWI/SNF-related matrix-associated actin-dependent regulator of chromatin subfamily D member 2 OS=Rattus norvegicus OX=10116 GN=Smarcd2 PE=1 SV=3	3.2	59.128	0	0	0	0	0	0	0	0	0	0	0	0	0	0	0	39288
324	O54783	O54783	Choline/ethanolamine kinase	Chkb	sp|O54783|CHKB_RAT Choline/ethanolamine kinase OS=Rattus norvegicus OX=10116 GN=Chkb PE=1 SV=3	15.5	45.1	55552	106470	563570	82517	61497	111680	41515	62907	82876	0	87662	89095	140630	51496	100790	92521
325	O54835;P84025	O54835;P84025	Mothers against decapentaplegic homolog 9;Mothers against decapentaplegic homolog 3	Smad9;Smad3	sp|O54835|SMAD9_RAT Mothers against decapentaplegic homolog 9 OS=Rattus norvegicus OX=10116 GN=Smad9 PE=1 SV=1;sp|P84025|SMAD3_RAT Mothers against decapentaplegic homolog 3 OS=Rattus norvegicus OX=10116 GN=Smad3 PE=1 SV=1	12.7	48.991	0	0	0	0	0	0	0	0	0	0	0	0	0	93261	0	0
326	O54874	O54874	Serine/threonine-protein kinase MRCK alpha	Cdc42bpa	sp|O54874|MRCKA_RAT Serine/threonine-protein kinase MRCK alpha OS=Rattus norvegicus OX=10116 GN=Cdc42bpa PE=1 SV=1	3	197.06	0	0	99172	0	18423	22723	0	0	0	30194	16340	0	0	0	0	0
327	O54921	O54921	Exocyst complex component 2	Exoc2	sp|O54921|EXOC2_RAT Exocyst complex component 2 OS=Rattus norvegicus OX=10116 GN=Exoc2 PE=1 SV=1	4.8	104.03	48220	54045	37527	47017	48475	53501	55389	41394	50700	129060	47360	41266	55231	74646	47169	48015
328	O54922	O54922	Exocyst complex component 7	Exoc7	sp|O54922|EXOC7_RAT Exocyst complex component 7 OS=Rattus norvegicus OX=10116 GN=Exoc7 PE=1 SV=1	6.6	75.045	46407	35961	0	17430	130050	0	0	0	0	18209	0	0	0	0	0	52077
329	O54923	O54923	Exocyst complex component 6	Exoc6	sp|O54923|EXOC6_RAT Exocyst complex component 6 OS=Rattus norvegicus OX=10116 GN=Exoc6 PE=1 SV=2	8.1	93.177	0	111880	218150	60070	69829	84863	53108	68900	92554	155910	69448	25131	102000	138250	102490	38086
330	O54924	O54924	Exocyst complex component 8	Exoc8	sp|O54924|EXOC8_RAT Exocyst complex component 8 OS=Rattus norvegicus OX=10116 GN=Exoc8 PE=1 SV=1	14.7	81.042	174530	130750	426760	461170	15931	89473	125750	103770	289750	253880	0	179570	0	306790	100360	311390
331	O54937	O54937	[Pyruvate dehydrogenase (acetyl-transferring)] kinase isozyme 4, mitochondrial	Pdk4	sp|O54937|PDK4_RAT [Pyruvate dehydrogenase (acetyl-transferring)] kinase isozyme 4, mitochondrial OS=Rattus norvegicus OX=10116 GN=Pdk4 PE=1 SV=1	33.5	46.678	385420	620900	796930	504730	423780	382450	445140	398440	381830	1697300	822390	1066700	2731200	884640	2481700	661310
332	O54975	O54975	Xaa-Pro aminopeptidase 1;Xaa-Pro aminopeptidase 1, N-terminally processed	Xpnpep1	sp|O54975|XPP1_RAT Xaa-Pro aminopeptidase 1 OS=Rattus norvegicus OX=10116 GN=Xpnpep1 PE=1 SV=1	32.3	69.657	1044000	977400	1085400	888760	961230	845840	1121600	1145300	1351900	1328200	1072800	928380	1057000	1129000	1144100	953090
333	O54980	O54980	Synaptogyrin-2	Syngr2	sp|O54980|SNG2_RAT Synaptogyrin-2 OS=Rattus norvegicus OX=10116 GN=Syngr2 PE=1 SV=2	12.9	24.711	508490	736620	1815500	529330	449520	645480	557310	466680	609370	1020100	747140	584370	590580	854780	705390	459690
334	O55007;O55007-3;O55007-1	O55007;O55007-3	Ral GTPase-activating protein subunit alpha-1	Ralgapa1	sp|O55007|RGPA1_RAT Ral GTPase-activating protein subunit alpha-1 OS=Rattus norvegicus OX=10116 GN=Ralgapa1 PE=1 SV=2;sp|O55007-3|RGPA1_RAT Isoform 2 of Ral GTPase-activating protein subunit alpha-1 OS=Rattus norvegicus OX=10116 GN=Ralgapa1	5.3	229.44	0	161930	363330	0	62830	0	0	0	0	0	0	0	0	183310	0	0
335	O55012-2;O55012	O55012-2;O55012	Phosphatidylinositol-binding clathrin assembly protein	Picalm	sp|O55012-2|PICAL_RAT Isoform 2 of Phosphatidylinositol-binding clathrin assembly protein OS=Rattus norvegicus OX=10116 GN=Picalm;sp|O55012|PICAL_RAT Phosphatidylinositol-binding clathrin assembly protein OS=Rattus norvegicus OX=10116 GN=Picalm PE=1 SV=1	25.1	64.656	910750	1070300	1263000	803960	756910	754250	755670	899830	781460	1243200	798350	719520	929720	914630	826160	750140
336	O55043	O55043	Rho guanine nucleotide exchange factor 7	Arhgef7	sp|O55043|ARHG7_RAT Rho guanine nucleotide exchange factor 7 OS=Rattus norvegicus OX=10116 GN=Arhgef7 PE=1 SV=1	21.4	73.139	244310	295610	721650	338520	268410	388010	348830	330590	158780	285310	384420	438890	431030	210410	402960	322420
337	O55096	O55096	Dipeptidyl peptidase 3	Dpp3	sp|O55096|DPP3_RAT Dipeptidyl peptidase 3 OS=Rattus norvegicus OX=10116 GN=Dpp3 PE=1 SV=2	32.9	83.038	493360	634230	780150	600290	606380	540230	629730	465390	762470	998420	578760	547680	553450	764040	631270	586010
338	O55164	O55164	Multiple PDZ domain protein	Mpdz	sp|O55164|MPDZ_RAT Multiple PDZ domain protein OS=Rattus norvegicus OX=10116 GN=Mpdz PE=1 SV=1	2.7	218.59	0	0	0	0	0	0	57838	0	0	69482	0	0	0	164070	0	0
339	O55166	O55166	Vacuolar protein sorting-associated protein 52 homolog	Vps52	sp|O55166|VPS52_RAT Vacuolar protein sorting-associated protein 52 homolog OS=Rattus norvegicus OX=10116 GN=Vps52 PE=1 SV=2	4.4	82.102	0	0	0	0	0	0	0	0	0	0	0	25017	0	0	0	0
340	O55171	O55171	Acyl-coenzyme A thioesterase 2, mitochondrial	Acot2	sp|O55171|ACOT2_RAT Acyl-coenzyme A thioesterase 2, mitochondrial OS=Rattus norvegicus OX=10116 GN=Acot2 PE=1 SV=1	47.7	49.701	20711000	21076000	24046000	21669000	22720000	23119000	21587000	23068000	17067000	19465000	23016000	23691000	21135000	21119000	21116000	20694000
341	O55173	O55173	3-phosphoinositide-dependent protein kinase 1	Pdpk1	sp|O55173|PDPK1_RAT 3-phosphoinositide-dependent protein kinase 1 OS=Rattus norvegicus OX=10116 GN=Pdpk1 PE=1 SV=2	11.8	63.593	123010	113180	197190	131570	155060	125460	157860	151050	93641	107420	121320	146240	207700	122900	131340	122270
342	O55227	O55227	Protein unc-50 homolog	Unc50	sp|O55227|UNC50_RAT Protein unc-50 homolog OS=Rattus norvegicus OX=10116 GN=Unc50 PE=1 SV=1	7.7	30.435	0	0	142770	0	0	0	0	0	0	0	0	0	0	0	0	0
343	O70196	O70196	Prolyl endopeptidase	Prep	sp|O70196|PPCE_RAT Prolyl endopeptidase OS=Rattus norvegicus OX=10116 GN=Prep PE=1 SV=1	37.6	80.741	1069300	1367200	1597500	1128000	1124500	1298900	1277100	1272200	1556200	1676800	1321400	1250500	1598500	1313700	1484800	1189400
344	O70257	O70257	Syntaxin-7	Stx7	sp|O70257|STX7_RAT Syntaxin-7 OS=Rattus norvegicus OX=10116 GN=Stx7 PE=1 SV=4	31.8	29.85	201340	275220	516870	206220	225550	212070	224280	167660	272330	270660	230760	218310	253940	244750	218220	212150
345	O70351	O70351	3-hydroxyacyl-CoA dehydrogenase type-2	Hsd17b10	sp|O70351|HCD2_RAT 3-hydroxyacyl-CoA dehydrogenase type-2 OS=Rattus norvegicus OX=10116 GN=Hsd17b10 PE=1 SV=3	84.7	27.245	17821000	22014000	7796900	19265000	18005000	18207000	19613000	16292000	19252000	24188000	20420000	21018000	19673000	23381000	18581000	20159000
346	O70377	O70377	Synaptosomal-associated protein 23	Snap23	sp|O70377|SNP23_RAT Synaptosomal-associated protein 23 OS=Rattus norvegicus OX=10116 GN=Snap23 PE=1 SV=1	64.3	23.235	457790	543940	958110	392870	419480	408620	402660	415350	432460	504710	407460	331530	420730	416250	419220	349070
347	O70437	O70437	Mothers against decapentaplegic homolog 4	Smad4	sp|O70437|SMAD4_RAT Mothers against decapentaplegic homolog 4 OS=Rattus norvegicus OX=10116 GN=Smad4 PE=1 SV=1	8.2	60.469	255880	0	90118	213060	139040	205990	0	82977	211350	440320	279350	252280	316180	289000	0	268220
348	O70454	O70454	Protein BUD31 homolog	Bud31	sp|O70454|BUD31_RAT Protein BUD31 homolog OS=Rattus norvegicus OX=10116 GN=Bud31 PE=2 SV=2	27.1	17	0	145900	0	84865	0	0	62083	47477	0	66080	0	0	65656	56518	0	0
349	O70511-3;O70511;O70511-2;O70511-7;O70511-6;O70511-5;O70511-4	O70511-3;O70511;O70511-2;O70511-7;O70511-6;O70511-5;O70511-4	Ankyrin-3	Ank3	sp|O70511-3|ANK3_RAT Isoform 3 of Ankyrin-3 OS=Rattus norvegicus OX=10116 GN=Ank3;sp|O70511|ANK3_RAT Ankyrin-3 OS=Rattus norvegicus OX=10116 GN=Ank3 PE=1 SV=3;sp|O70511-2|ANK3_RAT Isoform 2 of Ankyrin-3 OS=Rattus norvegicus OX=10116 GN=Ank3;sp|O70511-7|ANK	40.1	197.42	4534800	6301800	6436100	4797900	4378800	4683300	4909000	4432300	5569400	9312600	6427800	6338000	7261100	8186600	7032200	6035900
350	O70593	O70593	Small glutamine-rich tetratricopeptide repeat-containing protein alpha	Sgta	sp|O70593|SGTA_RAT Small glutamine-rich tetratricopeptide repeat-containing protein alpha OS=Rattus norvegicus OX=10116 GN=Sgta PE=1 SV=1	24.5	34.157	394860	549350	693880	438130	435300	409970	436420	393170	569530	609920	361460	338660	420950	586820	474320	375590
351	O70595	O70595	ATP-binding cassette sub-family B member 6, mitochondrial	Abcb6	sp|O70595|ABCB6_RAT ATP-binding cassette sub-family B member 6, mitochondrial OS=Rattus norvegicus OX=10116 GN=Abcb6 PE=2 SV=1	13.4	93.304	71974	98059	161200	88265	77001	35245	123360	76057	158980	229330	85055	115010	115450	132080	158030	192330
352	O88267	O88267	Acyl-coenzyme A thioesterase 1	Acot1	sp|O88267|ACOT1_RAT Acyl-coenzyme A thioesterase 1 OS=Rattus norvegicus OX=10116 GN=Acot1 PE=1 SV=1	43.7	46.013	323660	238940	508240	223440	167430	214970	207510	272860	123060	178510	392290	544350	385390	430690	534450	339090
353	O88280	O88280	Slit homolog 3 protein	Slit3	sp|O88280|SLIT3_RAT Slit homolog 3 protein OS=Rattus norvegicus OX=10116 GN=Slit3 PE=2 SV=1	2.9	167.77	0	0	0	0	0	0	0	0	0	0	0	0	120150	0	0	0
354	O88339	O88339	Epsin-1	Epn1	sp|O88339|EPN1_RAT Epsin-1 OS=Rattus norvegicus OX=10116 GN=Epn1 PE=1 SV=1	29.2	60.157	441680	615640	601330	412620	397230	408470	452420	461510	500160	689510	467350	307660	416350	710930	412830	414410
355	O88350	O88350	Putative hydrolase RBBP9	Rbbp9	sp|O88350|RBBP9_RAT Serine hydrolase RBBP9 OS=Rattus norvegicus OX=10116 GN=Rbbp9 PE=1 SV=2	7	20.995	0	0	0	0	0	0	0	0	0	0	0	0	0	0	0	42494
356	O88377	O88377	Phosphatidylinositol 5-phosphate 4-kinase type-2 beta	Pip4k2b	sp|O88377|PI42B_RAT Phosphatidylinositol 5-phosphate 4-kinase type-2 beta OS=Rattus norvegicus OX=10116 GN=Pip4k2b PE=1 SV=1	14.4	47.263	143880	191060	293470	167700	157540	174270	150540	158570	145140	239940	236110	173870	244890	188850	204850	172210
357	O88436-4;O88436-3;O88436-2;O88436	O88436-4;O88436-3;O88436-2;O88436	Paired box protein Pax-4	Pax4	sp|O88436-4|PAX4_RAT Isoform D of Paired box protein Pax-4 OS=Rattus norvegicus OX=10116 GN=Pax4;sp|O88436-3|PAX4_RAT Isoform C of Paired box protein Pax-4 OS=Rattus norvegicus OX=10116 GN=Pax4;sp|O88436-2|PAX4_RAT Isoform B of Paired box protein Pax-4 OS=	11	20.069	0	0	0	0	0	0	0	0	0	0	0	0	0	0	0	434560
358	O88453	O88453	Scaffold attachment factor B1	Safb	sp|O88453|SAFB1_RAT Scaffold attachment factor B1 OS=Rattus norvegicus OX=10116 GN=Safb PE=1 SV=2	18	104.57	577740	746960	946940	591290	487900	556860	562890	491930	620000	1077200	912790	589580	1092800	715110	843240	618300
359	O88483	O88483	[Pyruvate dehydrogenase [acetyl-transferring]]-phosphatase 1, mitochondrial	Pdp1	sp|O88483|PDP1_RAT [Pyruvate dehydrogenase [acetyl-transferring]]-phosphatase 1, mitochondrial OS=Rattus norvegicus OX=10116 GN=Pdp1 PE=1 SV=1	32.5	61.207	778720	743260	818050	852770	759570	920860	953430	706190	698250	990630	865780	940150	1120000	782770	1036800	901780
360	O88484	O88484	[Pyruvate dehydrogenase [acetyl-transferring]]-phosphatase 2, mitochondrial	Pdp2	sp|O88484|PDP2_RAT [Pyruvate dehydrogenase [acetyl-transferring]]-phosphatase 2, mitochondrial OS=Rattus norvegicus OX=10116 GN=Pdp2 PE=2 SV=1	8.9	59.654	74566	0	0	80994	119730	0	80735	162310	0	114890	0	59410	0	44861	0	84376
361	O88496	O88496	Vitamin K-dependent gamma-carboxylase	Ggcx	sp|O88496|VKGC_RAT Vitamin K-dependent gamma-carboxylase OS=Rattus norvegicus OX=10116 GN=Ggcx PE=1 SV=1	4.1	87.478	0	0	0	0	0	0	0	0	0	0	0	0	0	0	0	52150
362	O88506	O88506	STE20/SPS1-related proline-alanine-rich protein kinase	Stk39	sp|O88506|STK39_RAT STE20/SPS1-related proline-alanine-rich protein kinase OS=Rattus norvegicus OX=10116 GN=Stk39 PE=1 SV=2	14.1	60.05	110990	289830	59231	100210	63199	48153	68749	92788	0	498310	167740	185610	169090	0	360450	195600
363	O88588;O88588-2	O88588;O88588-2	Phosphofurin acidic cluster sorting protein 1	Pacs1	sp|O88588|PACS1_RAT Phosphofurin acidic cluster sorting protein 1 OS=Rattus norvegicus OX=10116 GN=Pacs1 PE=1 SV=1;sp|O88588-2|PACS1_RAT Isoform PACS-1b of Phosphofurin acidic cluster sorting protein 1 OS=Rattus norvegicus OX=10116 GN=Pacs1	7	104.7	0	67244	105280	50496	54162	63870	52236	39811	0	106360	48714	42858	44870	82211	0	0
364	O88600	O88600	Heat shock 70 kDa protein 4	Hspa4	sp|O88600|HSP74_RAT Heat shock 70 kDa protein 4 OS=Rattus norvegicus OX=10116 GN=Hspa4 PE=1 SV=1	67.9	94.055	7180400	8151400	6989200	7210400	6487400	7211700	7276100	6813500	6323900	7656300	7739400	6444300	7421800	6841600	7604100	6854200
365	O88637-2;O88637	O88637-2;O88637	Ethanolamine-phosphate cytidylyltransferase	Pcyt2	sp|O88637-2|PCY2_RAT Isoform 2 of Ethanolamine-phosphate cytidylyltransferase OS=Rattus norvegicus OX=10116 GN=Pcyt2;sp|O88637|PCY2_RAT Ethanolamine-phosphate cytidylyltransferase OS=Rattus norvegicus OX=10116 GN=Pcyt2 PE=1 SV=1	13.7	43.431	251070	262730	97815	243200	226290	243140	215040	275590	321590	201430	246850	222850	157770	101860	192520	239380
366	O88656	O88656	Actin-related protein 2/3 complex subunit 1B	Arpc1b	sp|O88656|ARC1B_RAT Actin-related protein 2/3 complex subunit 1B OS=Rattus norvegicus OX=10116 GN=Arpc1b PE=1 SV=3	31.7	41.056	1213400	1468000	2020700	1233100	1205600	1182500	1410300	1540500	1189600	1507500	1339900	1047900	1268000	1385600	1452700	1091300
367	O88658-2;O88658;F1M4A4;O88658-3	O88658-2;O88658;F1M4A4;O88658-3	Kinesin-like protein KIF1B;Kinesin-like protein	Kif1b;Kif1a	sp|O88658-2|KIF1B_RAT Isoform 2 of Kinesin-like protein KIF1B OS=Rattus norvegicus OX=10116 GN=Kif1b;sp|O88658|KIF1B_RAT Kinesin-like protein KIF1B OS=Rattus norvegicus OX=10116 GN=Kif1b PE=1 SV=2;sp|F1M4A4|KIF1A_RAT Kinesin-like protein KIF1A OS=Rattus no	5.9	189.88	373000	455170	991400	316240	338270	274780	303670	315180	298430	452850	313010	273000	312070	394880	298970	314890
368	O88761	O88761	26S proteasome non-ATPase regulatory subunit 1	Psmd1	sp|O88761|PSMD1_RAT 26S proteasome non-ATPase regulatory subunit 1 OS=Rattus norvegicus OX=10116 GN=Psmd1 PE=1 SV=1	45.4	105.75	2567500	2914900	2484800	2472700	1991300	2448000	2633100	2243100	2138300	3553500	2889900	2792700	2848400	2535600	2686400	2718900
369	O88763	O88763	Phosphatidylinositol 3-kinase catalytic subunit type 3	Pik3c3	sp|O88763|PK3C3_RAT Phosphatidylinositol 3-kinase catalytic subunit type 3 OS=Rattus norvegicus OX=10116 GN=Pik3c3 PE=1 SV=1	3.2	101.53	122490	182200	209270	85334	0	154120	156210	105930	164290	330220	194630	172790	278630	202400	303910	168750
370	O88767	O88767	Protein deglycase DJ-1	Park7	sp|O88767|PARK7_RAT Parkinson disease protein 7 homolog OS=Rattus norvegicus OX=10116 GN=Park7 PE=1 SV=1	89.4	19.974	9901600	12648000	19415000	10047000	10509000	10484000	10201000	10721000	8621600	8099500	8049800	6538800	8457000	9033100	8721000	7107300
371	O88794	O88794	Pyridoxine-5-phosphate oxidase	Pnpo	sp|O88794|PNPO_RAT Pyridoxine-5-phosphate oxidase OS=Rattus norvegicus OX=10116 GN=Pnpo PE=1 SV=1	49.4	30.184	484860	647600	326220	552480	532330	622330	535950	535670	609950	552480	723610	384370	529280	665230	490990	500410
372	O88797-2;O88797	O88797-2;O88797	Disabled homolog 2	Dab2	sp|O88797-2|DAB2_RAT Isoform p59 of Disabled homolog 2 OS=Rattus norvegicus OX=10116 GN=Dab2;sp|O88797|DAB2_RAT Disabled homolog 2 OS=Rattus norvegicus OX=10116 GN=Dab2 PE=1 SV=1	10.5	58.879	114980	105330	120800	0	154320	80006	116160	221030	0	0	116440	126010	103000	0	97154	137850
373	O88801-2;O88801	O88801-2;O88801	Homer protein homolog 2	Homer2	sp|O88801-2|HOME2_RAT Isoform 2 of Homer protein homolog 2 OS=Rattus norvegicus OX=10116 GN=Homer2;sp|O88801|HOME2_RAT Homer protein homolog 2 OS=Rattus norvegicus OX=10116 GN=Homer2 PE=1 SV=1	9.3	39.456	0	0	0	0	0	0	0	0	0	0	0	0	0	0	0	41713
374	O88813	O88813	Long-chain-fatty-acid--CoA ligase 5	Acsl5	sp|O88813|ACSL5_RAT Long-chain-fatty-acid--CoA ligase 5 OS=Rattus norvegicus OX=10116 GN=Acsl5 PE=1 SV=1	11.9	76.404	0	111910	0	151060	0	111570	0	89509	582840	163640	0	0	0	160050	107180	0
375	O88828	O88828	DNA-directed RNA polymerases I, II, and III subunit RPABC2	Polr2f	sp|O88828|RPAB2_RAT DNA-directed RNA polymerases I, II, and III subunit RPABC2 OS=Rattus norvegicus OX=10116 GN=Polr2f PE=1 SV=1	20.5	14.464	0	24482	50837	0	120870	109330	0	159620	25572	0	57999	74300	28404	0	62112	47107
376	O88884;O88884-2	O88884;O88884-2	A-kinase anchor protein 1, mitochondrial	Akap1	sp|O88884|AKAP1_RAT A-kinase anchor protein 1, mitochondrial OS=Rattus norvegicus OX=10116 GN=Akap1 PE=1 SV=1;sp|O88884-2|AKAP1_RAT Isoform 2 of A-kinase anchor protein 1, mitochondrial OS=Rattus norvegicus OX=10116 GN=Akap1	36.7	91.746	780650	1001700	1527600	751660	577530	777350	718100	605520	566190	1343700	983580	810340	998170	932040	1053400	714370
377	O88900	O88900	Growth factor receptor-bound protein 14	Grb14	sp|O88900|GRB14_RAT Growth factor receptor-bound protein 14 OS=Rattus norvegicus OX=10116 GN=Grb14 PE=1 SV=1	30.1	60.592	696470	763230	1435100	693840	542030	605110	679900	676880	411520	251940	279750	254060	224470	385990	314250	354090
378	O88902	O88902	Tyrosine-protein phosphatase non-receptor type 23	Ptpn23	sp|O88902|PTN23_RAT Tyrosine-protein phosphatase non-receptor type 23 (Fragment) OS=Rattus norvegicus OX=10116 GN=Ptpn23 PE=1 SV=2	4.2	163.45	58494	121410	204080	38031	0	50741	124070	45357	69874	173590	62682	54316	37712	117750	81142	0
379	O88923-3;O88923-6;O88923-2;O88923-4;O88923-5;O88923-1;O88923	O88923-3;O88923-6;O88923-2;O88923-4;O88923-5;O88923-1;O88923	Latrophilin-2	Lphn2	sp|O88923-3|AGRL2_RAT Isoform 4 of Adhesion G protein-coupled receptor L2 OS=Rattus norvegicus OX=10116 GN=Adgrl2;sp|O88923-6|AGRL2_RAT Isoform 7 of Adhesion G protein-coupled receptor L2 OS=Rattus norvegicus OX=10116 GN=Adgrl2;sp|O88923-2|AGRL2_RAT Isofor	3.2	159.32	0	0	0	0	0	0	0	0	49825	79045	0	0	0	0	0	0
380	O88941	O88941	Mannosyl-oligosaccharide glucosidase	Mogs	sp|O88941|MOGS_RAT Mannosyl-oligosaccharide glucosidase OS=Rattus norvegicus OX=10116 GN=Mogs PE=1 SV=1	14.1	91.87	343000	340550	490160	295560	214680	258730	409480	290410	362210	503700	419720	436020	562200	467930	567940	418860
381	O88984	O88984	Nuclear RNA export factor 1	Nxf1	sp|O88984|NXF1_RAT Nuclear RNA export factor 1 OS=Rattus norvegicus OX=10116 GN=Nxf1 PE=2 SV=1	15.4	70.361	0	0	0	89644	76668	99506	67794	133440	61285	116090	0	51647	104390	72253	148240	39484
382	O88989	O88989	Malate dehydrogenase, cytoplasmic	Mdh1	sp|O88989|MDHC_RAT Malate dehydrogenase, cytoplasmic OS=Rattus norvegicus OX=10116 GN=Mdh1 PE=1 SV=3	76	36.483	45442000	39047000	50934000	46534000	57620000	49276000	45347000	54599000	46185000	31651000	47648000	48498000	41383000	37185000	40786000	46711000
383	O88994	O88994	Mitochondrial amidoxime reducing component 2	2021-03-02	sp|O88994|MARC2_RAT Mitochondrial amidoxime reducing component 2 OS=Rattus norvegicus OX=10116 GN=Mtarc2 PE=2 SV=1	10.9	38.248	0	0	0	0	0	0	0	0	0	77822	0	0	113680	0	0	0
384	O89046	O89046	Coronin-1B	Coro1b	sp|O89046|COR1B_RAT Coronin-1B OS=Rattus norvegicus OX=10116 GN=Coro1b PE=1 SV=1	23.1	53.845	206070	270590	186580	309420	280660	291320	184410	365050	211100	175520	253200	278970	163450	380270	244900	246740
385	O89049	O89049	Thioredoxin reductase 1, cytoplasmic	Txnrd1	sp|O89049|TRXR1_RAT Thioredoxin reductase 1, cytoplasmic OS=Rattus norvegicus OX=10116 GN=Txnrd1 PE=1 SV=5	37.3	54.67	512240	462150	324880	541620	560640	641790	573650	473590	615540	342060	511010	475880	574990	425260	526500	430610
386	P00159	P00159	Cytochrome b	Mt-Cyb	sp|P00159|CYB_RAT Cytochrome b OS=Rattus norvegicus OX=10116 GN=Mt-Cyb PE=3 SV=3	2.4	43.012	0	0	0	0	0	0	0	0	0	0	0	0	0	0	0	263910
387	P00173-2;P00173	P00173-2;P00173	Cytochrome b5	Cyb5a	sp|P00173-2|CYB5_RAT Isoform Short of Cytochrome b5 OS=Rattus norvegicus OX=10116 GN=Cyb5a;sp|P00173|CYB5_RAT Cytochrome b5 OS=Rattus norvegicus OX=10116 GN=Cyb5a PE=1 SV=2	64	11.406	451860	549370	396070	493670	460680	508860	557670	491930	571840	538240	505780	363590	384960	399980	462990	365150
388	P00388	P00388	NADPH--cytochrome P450 reductase	Por	sp|P00388|NCPR_RAT NADPH--cytochrome P450 reductase OS=Rattus norvegicus OX=10116 GN=Por PE=1 SV=3	42.3	76.962	1706700	1663200	1482700	1706700	1458300	1562700	1633700	1552700	1529400	2360900	1786100	1959000	1872900	1790200	2138000	1698300
389	P00406	P00406	Cytochrome c oxidase subunit 2	Mtco2	sp|P00406|COX2_RAT Cytochrome c oxidase subunit 2 OS=Rattus norvegicus OX=10116 GN=Mtco2 PE=1 SV=3	35.2	25.928	25840000	21137000	25199000	24162000	25593000	23564000	24180000	27069000	40246000	31486000	29500000	31395000	28441000	29544000	30093000	29059000
390	P00507	P00507	Aspartate aminotransferase, mitochondrial	Got2	sp|P00507|AATM_RAT Aspartate aminotransferase, mitochondrial OS=Rattus norvegicus OX=10116 GN=Got2 PE=1 SV=2	78.4	47.314	71757000	82128000	37126000	71417000	74075000	69705000	71679000	70363000	76892000	69537000	73355000	69634000	67538000	75384000	66745000	67642000
391	P00564	P00564	Creatine kinase M-type	Ckm	sp|P00564|KCRM_RAT Creatine kinase M-type OS=Rattus norvegicus OX=10116 GN=Ckm PE=1 SV=2	81.4	43.044	83301000	83268000	125270000	82211000	103790000	83162000	81471000	93299000	85276000	51661000	79911000	74423000	68816000	75858000	69458000	77818000
392	P00697	P00697	Lysozyme C-1	Lyz1	sp|P00697|LYSC1_RAT Lysozyme C-1 OS=Rattus norvegicus OX=10116 GN=Lyz1 PE=1 SV=2	28.4	16.729	108290	133590	0	114880	0	116510	103860	0	145480	149450	144830	84909	134060	0	149380	137090
393	P00762	P00762	Anionic trypsin-1	Prss1	sp|P00762|TRY1_RAT Anionic trypsin-1 OS=Rattus norvegicus OX=10116 GN=Prss1 PE=1 SV=1	8.1	25.959	0	0	0	0	0	0	0	0	0	0	67570	0	0	0	0	0
394	P00786	P00786	Pro-cathepsin H;Cathepsin H mini chain;Cathepsin H;Cathepsin H heavy chain;Cathepsin H light chain	Ctsh	sp|P00786|CATH_RAT Pro-cathepsin H OS=Rattus norvegicus OX=10116 GN=Ctsh PE=1 SV=1	24.9	37.104	188380	0	0	206450	225430	208840	231130	287370	200990	218790	213340	228890	329410	0	229210	317380
395	P00787	P00787	Cathepsin B;Cathepsin B light chain;Cathepsin B heavy chain	Ctsb	sp|P00787|CATB_RAT Cathepsin B OS=Rattus norvegicus OX=10116 GN=Ctsb PE=1 SV=2	35.7	37.47	597930	729680	439710	584960	374660	504640	576100	526990	554600	968330	558680	490350	560070	696770	585830	612430
396	P01015	P01015	Angiotensinogen;Angiotensin-1;Angiotensin-2;Angiotensin-3;Angiotensin-4;Angiotensin 1-9;Angiotensin 1-7;Angiotensin 1-5;Angiotensin 1-4	Agt	sp|P01015|ANGT_RAT Angiotensinogen OS=Rattus norvegicus OX=10116 GN=Agt PE=1 SV=1	18	51.981	341570	435650	823020	281090	309150	301050	369530	288470	413770	404260	234720	224300	292690	392300	208480	305120
397	P01026	P01026	Complement C3;Complement C3 beta chain;C3-beta-c;Complement C3 alpha chain;C3a anaphylatoxin;Acylation stimulating protein;Complement C3b alpha chain;Complement C3c alpha chain fragment 1;Complement C3dg fragment;Complement C3g fragment;Complement C3d fragment;Complement C3f fragment;Complement C3c alpha chain fragment 2	C3	sp|P01026|CO3_RAT Complement C3 OS=Rattus norvegicus OX=10116 GN=C3 PE=1 SV=3	62.8	186.46	14850000	19476000	16980000	13723000	15773000	16812000	16977000	14760000	22939000	11643000	11100000	8126300	9188800	16662000	8289100	10356000
398	P01041	P01041	Cystatin-B	Cstb	sp|P01041|CYTB_RAT Cystatin-B OS=Rattus norvegicus OX=10116 GN=Cstb PE=1 SV=1	75.5	11.196	832320	3105900	6786200	1972100	2484900	2310900	2735500	1606900	2385100	4422500	2645900	2426300	3063700	3741400	3364400	2997700
399	P01048	P01048	T-kininogen 1;T-kininogen 1 heavy chain;T-kinin;T-kininogen 1 light chain	Map1	sp|P01048|KNT1_RAT T-kininogen 1 OS=Rattus norvegicus OX=10116 GN=Map1 PE=1 SV=2	39.8	47.775	572700	197680	1154300	329170	604230	494220	315070	299590	348550	416450	418440	467750	356920	356570	90933	1176700
400	P01161	P01161	Natriuretic peptides A;Atrial natriuretic factor;Auriculin-B;Auriculin-A;Atriopeptin-1;Atriopeptin-2;Atriopeptin-3	Nppa	sp|P01161|ANF_RAT Natriuretic peptides A OS=Rattus norvegicus OX=10116 GN=Nppa PE=1 SV=1	33.6	16.556	76575	89760	207430	31867	0	57669	498170	153040	42710	314780	1180300	49958	628740	182460	199350	76643
401	P01835	P01835	Ig kappa chain C region, B allele		sp|P01835|KACB_RAT Ig kappa chain C region, B allele OS=Rattus norvegicus OX=10116 PE=1 SV=1	81.1	11.601	938240	1324400	1969000	1065200	1275200	1249200	1036200	845520	991180	1025600	2277800	1678800	958640	1245500	979300	1946200
402	P01836	P01836	Ig kappa chain C region, A allele		sp|P01836|KACA_RAT Ig kappa chain C region, A allele OS=Rattus norvegicus OX=10116 PE=1 SV=1	76.4	11.732	0	0	0	0	0	0	0	0	364600	497050	612210	416080	261000	1149700	368160	472080
403	P01946	P01946	Hemoglobin subunit alpha-1/2	Hba1	sp|P01946|HBA_RAT Hemoglobin subunit alpha-1/2 OS=Rattus norvegicus OX=10116 GN=Hba1 PE=1 SV=3	75.4	15.328	146200000	134400000	161690000	124100000	143610000	120110000	130540000	119890000	132500000	116060000	116460000	114440000	115320000	127240000	107830000	131960000
404	P02091;CON__P02070	P02091	Hemoglobin subunit beta-1	Hbb	sp|P02091|HBB1_RAT Hemoglobin subunit beta-1 OS=Rattus norvegicus OX=10116 GN=Hbb PE=1 SV=3	95.9	15.979	64687000	56168000	86595000	51403000	77186000	52898000	50608000	58250000	87837000	39703000	49797000	51475000	46747000	72340000	35198000	52378000
405	P02262	P02262	Histone H2A type 1		sp|P02262|H2A1_RAT Histone H2A type 1 OS=Rattus norvegicus OX=10116 PE=1 SV=2	58.5	14.077	0	0	0	0	0	0	0	102080	0	0	0	0	0	0	0	0
406	P02401	P02401	60S acidic ribosomal protein P2	Rplp2	sp|P02401|RLA2_RAT 60S acidic ribosomal protein P2 OS=Rattus norvegicus OX=10116 GN=Rplp2 PE=1 SV=2	97.4	11.692	6954000	7708900	6023800	7180500	6184500	7443800	7476700	6205700	8020100	9244200	7607800	7498200	7638900	9824600	8095700	8178500
407	P02454;CON__Q862S4	P02454	Collagen alpha-1(I) chain	Col1a1	sp|P02454|CO1A1_RAT Collagen alpha-1(I) chain OS=Rattus norvegicus OX=10116 GN=Col1a1 PE=1 SV=5	10.2	137.95	238790	307110	743080	247440	161990	219080	303670	281450	305660	383110	325250	189230	288280	323280	278160	266670
408	P02466	P02466	Collagen alpha-2(I) chain	Col1a2	sp|P02466|CO1A2_RAT Collagen alpha-2(I) chain OS=Rattus norvegicus OX=10116 GN=Col1a2 PE=1 SV=3	6.6	129.56	192550	228310	442570	158800	134140	134290	278460	214180	208100	260790	155340	114320	186320	214720	187620	180930
409	P02563	P02563	Myosin-6	Myh6	sp|P02563|MYH6_RAT Myosin-6 OS=Rattus norvegicus OX=10116 GN=Myh6 PE=1 SV=2	77.5	223.51	1487000000	1675600000	1503700000	1510300000	1615900000	1549100000	1524100000	1504300000	1889700000	1585000000	1576400000	1494500000	1485600000	1736300000	1557500000	1499400000
410	07660;207661;207662;207663;207664;207665;207666;207667;207668;207669;207670;207671;207672;207673;207674;207675;207676;207677;207678;207679;207680;207681;207682;207683;207684;207685;207686;207687;207688;207689;207690;207691;207692;207693;207694;207695;207696;207697;207698;207699;207700;207701;207702;207703;207704;207705;207706;207707;207708;207709;207710;207711;207712;207713;207714;207715;207716;2…
411	93769;293770;293771;293772;293773;293774;293775;293776;293777;293778;293779;293780;293781;293782;293783;293784;293785;293786;293787;293788;293789;293790;293791;293792;293793;293794;293795;293796;293797;293798;293799;293800;293801;293802;293803;293804;293805;293806;293807;293808;293809;293810;293811;293812;293813;293814;293815;293816;293817;293818;293819;293820;293821;293822;293823;293824;293825;2…
412	63789;363790;363791;363792;363793;363794;363795;363796;363797;363798;363799;363800;363801;363802;363803;363804;363805;363806;363807;363808;363809;363810;363811;363812;363813;363814;363815;363816;363817;363818;363819;363820;363821;363822;363823;363824;363825;363826;363827;363828;363829;363830;363831;363832;363833;363834;363835;363836;363837;363838;363839;363840;363841;363842;363843;363844;363845;3…
413	30963;530964;530965;530966;530967;530968;530969;530970;530971;530972;530973;530974;530975;530976;530977;530978;530979;530980;530981;530982;530983;530984;530985;530986;530987;530988;530989;530990;530991;530992;530993;530994;530995;530996;530997;530998;530999;531000;531001;531002;531003;531004;531005;531006;531007;531008;531009;531010;531011;531012;531013;531014;531015;531016;531017;531018;531019;5…	5580;5581;5582;5583;5584;5585;5586;5587;5588;5589;5590;5591;5592;5593;5594;5595;5596;5597;5598;5599;5600;5601;5602;5603;5604;5605;5606;5607;5608;5609;5610;5611;5612;5613;5614;5615;5616;5617;5618;5619;5620;5621;5622;5623;5624;5625;5626;5627;9501;9502;9503;9504;9505;9506;9507;9508;9509;9510;9511;9512;9513;9514;11127;11128;11129;11130;11131;11132;11133;11134;11135;11136;11137;11138;11139;11140;11141…
414	35;151036;151037;151038;151039;151040;151041;151042;151043;151044;151045;151046;151047;151048;151049;151050;151051;151052;151053;151054;151055;151056;151057;151058;151059;151060;151061;151062;151063;151064;151065;151066;151067;151068;151069;151070;151071;151072;151073;151074;151075;151076;151077;151078;151079;151080;151081;151082;151083;151084;151085;151086;151087;151088;151089;151090;151091;1510…
415	31;229332;229333;229334;229335;229336;229337;229338;229339;229340;229341;229342;229343;229344;229345;229346;229347;229348;229349;229350;229351;229352;229353;229354;229355;229356;229357;229358;229359;229360;229361;229362;229363;229364;229365;229366;229367;229368;229369;229370;229371;229372;229373;229374;229375;229376;229377;229378;229379;229380;229381;229382;229383;229384;229385;229386;236367;2363…	5584;5602;9510;9514;11136;11203;11231;12184;12212;14242;14393;14482;15529;15583;19167;19214;22195;22250;22535;22962;24233;24251;24272;31938;34152;34162;34762;40221;40276;40307;42417;42517;46365;46829;49040;49054;49077;54182;54215;54284;55376;55397;55766;55781;55840;57069;61836;61860;61995;62028;64472;64499;64537;65116;65837;65897;66358;66379;66390;66418;66543;66686;66703;66707;67328;68072;68110;6…	196;643;644;980;1310;1367;1489;1492;1498;1543;1680	-1
416	P02564;B1WBU8	P02564	Myosin-7	Myh7	sp|P02564|MYH7_RAT Myosin-7 OS=Rattus norvegicus OX=10116 GN=Myh7 PE=1 SV=2	73.4	223.08	52389000	63532000	87995000	74234000	55052000	70774000	52861000	55942000	61043000	179490000	160950000	144430000	178150000	177850000	203750000	133570000
417	62;224663;224664;224665;224666;224667;224668;224669;224670;224671;224672;224673;224674;224675;224676;224677;224678;224679;224680;224681;224682;224683;224684;224685;224686;224687;224688;224689;224690;224691;224692;224693;224694;224695;224696;224697;224698;224699;224700;224701;224702;224703;224704;224705;224706;224707;224708;224709;224710;224711;224712;224713;224714;224715;224716;224717;224718;2247…
418	05;323206;323207;323208;325267;325268;325269;325270;325271;325272;325273;325274;325275;325276;325277;325278;325279;325280;325281;325282;325283;325284;325285;325286;325287;325288;325289;325290;325291;325292;325293;325294;325295;325296;325297;325298;325299;325300;325301;325302;325303;325304;325305;325306;325307;325308;325309;325310;325703;325704;325705;325706;325707;325708;325709;325710;325711;3257…
419	33;472234;472235;472236;472237;472238;472239;472240;472241;472242;472243;472244;472245;472246;472247;472248;472249;472250;472251;472252;472253;472254;472848;472849;472850;472851;472852;472853;472854;472855;472856;472857;472858;472859;472860;472861;472862;472863;472864;472865;472866;472867;472868;472869;472870;472871;472872;472873;472874;472875;472876;472877;472878;472879;472880;472881;472882;4728…	5580;5581;5582;5583;5584;5585;5586;5587;5588;5589;5590;5591;5592;5593;5594;5595;5596;5597;5598;5599;5600;5601;5602;5603;5604;5605;5606;5607;5608;5609;5610;5611;5612;5613;5614;5615;5616;5617;5618;5619;5620;5621;5622;5623;5624;5625;5626;5627;8244;8245;8246;8247;9501;9502;9503;9504;9505;9506;9507;9508;9509;9510;9511;9512;9513;9514;11127;11128;11129;11130;11131;11132;11133;11134;11135;11136;11137;111…
420	70967;170968;170969;170970;170971;170972;170973;170974;170975;170976;170977;170978;170979;170980;170981;170982;170983;170984;170985;170986;170987;170988;170989;170990;170991;170992;170993;170994;170995;170996;170997;170998;170999;171000;171001;171002;171003;171004;171005;171006;171007;171008;171009;171010;171011;171012;171013;171014;171015;171016;171017;171018;171019;171020;171021;171119;171120;1…	5584;5602;8246;9510;9514;11136;11203;11231;14242;14393;14482;15567;15583;19167;19214;22195;22250;22535;24233;24251;24272;31938;34177;34762;37708;40221;40276;40307;42417;42517;46829;47434;49566;50724;52441;54182;54215;54284;55440;55466;57069;60951;61836;61860;61995;62028;64556;64579;64600;65116;65837;65897;66358;66379;66455;66543;66686;66703;66707;67328;68147;68163;74462;74475;76693;76784;77992;90…	642;643;1222;1232;1233;1366;1488;1491;1497	-1;-1
421	P02650	P02650	Apolipoprotein E	Apoe	sp|P02650|APOE_RAT Apolipoprotein E OS=Rattus norvegicus OX=10116 GN=Apoe PE=1 SV=2	61.2	35.753	2968400	3664100	4598700	3358400	3416300	3752600	3368700	2806200	3615200	4290100	5054000	4513400	4589300	6913100	3280000	4448200
422	P02651	P02651	Apolipoprotein A-IV	Apoa4	sp|P02651|APOA4_RAT Apolipoprotein A-IV OS=Rattus norvegicus OX=10116 GN=Apoa4 PE=1 SV=2	79.5	44.456	3698200	4847000	4236100	4116000	3321700	4534100	4623200	3680200	3153100	6275200	5972100	6063500	6002900	8225900	6013800	6572500
423	P02680-2;P02680	P02680-2;P02680	Fibrinogen gamma chain	Fgg	sp|P02680-2|FIBG_RAT Isoform Gamma-A of Fibrinogen gamma chain OS=Rattus norvegicus OX=10116 GN=Fgg;sp|P02680|FIBG_RAT Fibrinogen gamma chain OS=Rattus norvegicus OX=10116 GN=Fgg PE=1 SV=3	66.6	49.651	3255900	3673000	4805000	2628900	3559900	3719200	3583800	3356900	4067800	2070000	2325800	1898300	2211500	2352600	2250800	2172100
424	P02770	P02770	Serum albumin	Alb	sp|P02770|ALBU_RAT Albumin OS=Rattus norvegicus OX=10116 GN=Alb PE=1 SV=2	86.8	68.73	230140000	267890000	223650000	212910000	260250000	247690000	257280000	230290000	206320000	208270000	195340000	156030000	192940000	239670000	179720000	209740000
425	P02773;P02773-2	P02773;P02773-2	Alpha-fetoprotein	Afp	sp|P02773|FETA_RAT Alpha-fetoprotein OS=Rattus norvegicus OX=10116 GN=Afp PE=2 SV=1;sp|P02773-2|FETA_RAT Isoform 2 of Alpha-fetoprotein OS=Rattus norvegicus OX=10116 GN=Afp	59.7	68.385	562100	87855	67821	394700	188130	149150	39342	397190	63544	3531400	2114300	2136200	4305900	1158600	3910100	1196000
426	P03889	P03889	NADH-ubiquinone oxidoreductase chain 1	Mtnd1	sp|P03889|NU1M_RAT NADH-ubiquinone oxidoreductase chain 1 OS=Rattus norvegicus OX=10116 GN=Mtnd1 PE=1 SV=3	12.6	36.145	2109600	1887500	449130	1624200	1305300	1058000	1965300	1938600	2184300	2573100	2177700	2112300	1730600	2613900	2478900	2293500
427	P04041	P04041	Glutathione peroxidase 1	Gpx1	sp|P04041|GPX1_RAT Glutathione peroxidase 1 OS=Rattus norvegicus OX=10116 GN=Gpx1 PE=1 SV=4	81.1	22.305	3489800	7504900	2379200	7306800	5871700	5137700	5158700	6910300	6650000	4515200	3956200	3880100	4408900	4527600	3721500	3801000
428	P04094	P04094	Proenkephalin-A;Synenkephalin;Met-enkephalin;PENK(114-133);PENK(143-185);Met-enkephalin-Arg-Gly-Leu;Leu-enkephalin;PENK(239-260);Met-enkephalin-Arg-Phe	Penk	sp|P04094|PENK_RAT Proenkephalin-A OS=Rattus norvegicus OX=10116 GN=Penk PE=1 SV=1	13.8	30.932	0	131580	76044	51077	30917	0	49401	40350	0	0	0	0	0	0	0	0
429	P04166	P04166	Cytochrome b5 type B	Cyb5b	sp|P04166|CYB5B_RAT Cytochrome b5 type B OS=Rattus norvegicus OX=10116 GN=Cyb5b PE=1 SV=2	51.4	16.265	363530	498860	362750	341670	363380	390130	404300	224670	877970	845030	525210	559430	569760	695530	556210	505280
430	P04182	P04182	Ornithine aminotransferase, mitochondrial	Oat	sp|P04182|OAT_RAT Ornithine aminotransferase, mitochondrial OS=Rattus norvegicus OX=10116 GN=Oat PE=1 SV=1	72	48.332	2213900	2377300	2060000	2217000	2441000	2507400	2653100	2273700	2923000	2414400	2851800	2550700	2839200	2664900	2467700	2563700
431	P04256	P04256	Heterogeneous nuclear ribonucleoprotein A1;Heterogeneous nuclear ribonucleoprotein A1, N-terminally processed	Hnrnpa1	sp|P04256|ROA1_RAT Heterogeneous nuclear ribonucleoprotein A1 OS=Rattus norvegicus OX=10116 GN=Hnrnpa1 PE=1 SV=3	71.6	34.212	2680800	2134400	2375700	2070300	2234500	2072600	1678500	2465400	2026100	2794800	1666400	2314300	2254700	2182600	2368700	2322400
432	P04276	P04276	Vitamin D-binding protein	Gc	sp|P04276|VTDB_RAT Vitamin D-binding protein OS=Rattus norvegicus OX=10116 GN=Gc PE=1 SV=3	74.2	53.544	4673300	5647900	7960100	4276800	4979400	5290600	5452200	5623800	3792800	3134700	3782200	2635800	3141100	3705900	2330800	3520400
433	P04550	P04550	Parathymosin	Ptms	sp|P04550|PTMS_RAT Parathymosin OS=Rattus norvegicus OX=10116 GN=Ptms PE=1 SV=2	25.5	11.559	924000	843160	2733400	654060	821430	639550	669260	857870	293530	747340	619610	599460	660600	780650	1100200	749990
434	P04636	P04636	Malate dehydrogenase, mitochondrial	Mdh2	sp|P04636|MDHM_RAT Malate dehydrogenase, mitochondrial OS=Rattus norvegicus OX=10116 GN=Mdh2 PE=1 SV=2	74.6	35.683	161420000	182340000	226450000	162160000	201620000	179660000	174020000	149320000	186070000	127940000	162690000	149860000	152000000	158810000	149200000	151390000
435	P04638	P04638	Apolipoprotein A-II;Proapolipoprotein A-II	Apoa2	sp|P04638|APOA2_RAT Apolipoprotein A-II OS=Rattus norvegicus OX=10116 GN=Apoa2 PE=2 SV=1	30.4	11.439	258570	167450	900740	170960	116110	155370	0	210510	0	0	56939	0	0	78770	0	63441
436	P04639	P04639	Apolipoprotein A-I;Proapolipoprotein A-I	Apoa1	sp|P04639|APOA1_RAT Apolipoprotein A-I OS=Rattus norvegicus OX=10116 GN=Apoa1 PE=1 SV=2	76.8	30.062	12964000	14447000	5318700	12405000	10046000	14573000	13521000	11156000	6738700	14001000	13507000	12033000	13987000	13575000	11513000	12661000
437	P04642;P19629	P04642	L-lactate dehydrogenase A chain	Ldha	sp|P04642|LDHA_RAT L-lactate dehydrogenase A chain OS=Rattus norvegicus OX=10116 GN=Ldha PE=1 SV=1	79.8	36.45	46464000	42342000	29221000	43214000	41651000	43669000	44849000	40930000	51067000	34692000	48331000	44253000	44489000	43206000	42308000	46652000
438	P04644	P04644	40S ribosomal protein S17	Rps17	sp|P04644|RS17_RAT 40S ribosomal protein S17 OS=Rattus norvegicus OX=10116 GN=Rps17 PE=1 SV=3	61.5	15.51	2964100	3332400	5898200	2471900	2189300	2770900	2784300	4349500	3744500	4794000	3364800	3231900	3205100	4666200	3804400	3166400
439	P04646	P04646	60S ribosomal protein L35a	Rpl35a	sp|P04646|RL35A_RAT 60S ribosomal protein L35a OS=Rattus norvegicus OX=10116 GN=Rpl35a PE=3 SV=1	22.7	12.554	507780	430030	381840	427920	384270	438210	459910	327260	391480	707830	532960	484070	528530	616920	401240	480780
440	P04692;P04692-3;P04692-6	P04692;P04692-3;P04692-6	Tropomyosin alpha-1 chain	Tpm1	sp|P04692|TPM1_RAT Tropomyosin alpha-1 chain OS=Rattus norvegicus OX=10116 GN=Tpm1 PE=1 SV=3;sp|P04692-3|TPM1_RAT Isoform 3 of Tropomyosin alpha-1 chain OS=Rattus norvegicus OX=10116 GN=Tpm1;sp|P04692-6|TPM1_RAT Isoform 6 of Tropomyosin alpha-1 chain OS=Ra	95.8	32.68	176050000	216620000	230550000	175060000	197910000	190340000	176240000	184340000	210570000	178050000	176350000	157540000	159230000	207460000	164720000	152240000
441	P04692-2	P04692-2	Tropomyosin alpha-1 chain	Tpm1	sp|P04692-2|TPM1_RAT Isoform 2 of Tropomyosin alpha-1 chain OS=Rattus norvegicus OX=10116 GN=Tpm1	78.2	32.675	124310	223940	311080	126460	125050	177180	161700	80181	152680	233580	275990	268740	258510	219090	216960	120990
442	P04692-5;P04692-7;P04692-4;P04692-8	P04692-5;P04692-7;P04692-4;P04692-8	Tropomyosin alpha-1 chain	Tpm1	sp|P04692-5|TPM1_RAT Isoform 5 of Tropomyosin alpha-1 chain OS=Rattus norvegicus OX=10116 GN=Tpm1;sp|P04692-7|TPM1_RAT Isoform 7 of Tropomyosin alpha-1 chain OS=Rattus norvegicus OX=10116 GN=Tpm1;sp|P04692-4|TPM1_RAT Isoform 4 of Tropomyosin alpha-1 chain	78.4	28.343	188920	147000	1632900	224100	256350	230470	393240	81067	783380	0	502020	287430	506420	535180	339930	298240
443	P04762	P04762	Catalase	Cat	sp|P04762|CATA_RAT Catalase OS=Rattus norvegicus OX=10116 GN=Cat PE=1 SV=3	59.6	59.756	3721200	4909100	6851100	4245100	3317800	3696700	4228900	3546600	4437300	10895000	5627300	6057000	8372800	8518100	8834500	4953200
444	P04764	P04764	Alpha-enolase	Eno1	sp|P04764|ENOA_RAT Alpha-enolase OS=Rattus norvegicus OX=10116 GN=Eno1 PE=1 SV=4	81.3	47.127	52624000	56637000	38550000	52810000	57236000	56690000	54879000	51910000	91741000	90024000	94171000	82034000	84775000	95856000	86032000	85631000
445	P04785	P04785	Protein disulfide-isomerase	P4hb	sp|P04785|PDIA1_RAT Protein disulfide-isomerase OS=Rattus norvegicus OX=10116 GN=P4hb PE=1 SV=2	74.7	56.951	8414400	8915600	11117000	8067600	8129100	7605100	8400200	9105000	9622000	9657300	8477100	7125800	8137000	9192400	8194900	7933000
446	P04797	P04797	Glyceraldehyde-3-phosphate dehydrogenase	Gapdh	sp|P04797|G3P_RAT Glyceraldehyde-3-phosphate dehydrogenase OS=Rattus norvegicus OX=10116 GN=Gapdh PE=1 SV=3	87.7	35.828	119720000	104100000	52569000	114390000	128840000	111810000	119920000	113990000	137930000	81079000	114700000	105880000	106750000	107470000	99509000	120580000
447	P04897;P29348	P04897	Guanine nucleotide-binding protein G(i) subunit alpha-2	Gnai2	sp|P04897|GNAI2_RAT Guanine nucleotide-binding protein G(i) subunit alpha-2 OS=Rattus norvegicus OX=10116 GN=Gnai2 PE=1 SV=3	50.4	40.499	2748700	3198000	3658100	2681300	2330300	2463200	2655000	2524400	3011900	4052900	3141700	2934500	2991600	3249000	3071900	2765900
448	P04904;P46418;P04903;P00502	P04904	Glutathione S-transferase alpha-3	Gsta3	sp|P04904|GSTA3_RAT Glutathione S-transferase alpha-3 OS=Rattus norvegicus OX=10116 GN=Gsta3 PE=1 SV=3	24.9	25.319	0	0	0	0	0	0	0	134750	0	0	0	0	0	0	0	0
449	P04905	P04905	Glutathione S-transferase Mu 1	Gstm1	sp|P04905|GSTM1_RAT Glutathione S-transferase Mu 1 OS=Rattus norvegicus OX=10116 GN=Gstm1 PE=1 SV=2	33.5	25.914	90856	148380	104620	181280	195130	220170	271020	227970	95975	77456	63959	117610	61395	145620	120840	92543
450	P04906	P04906	Glutathione S-transferase P	Gstp1	sp|P04906|GSTP1_RAT Glutathione S-transferase P OS=Rattus norvegicus OX=10116 GN=Gstp1 PE=1 SV=2	71.4	23.439	3195800	3947800	3166400	3887300	4062400	4167400	3718300	3921500	3432700	3406100	3314300	3121700	3480400	3386000	3447200	3249700
451	P04916	P04916	Retinol-binding protein 4	Rbp4	sp|P04916|RET4_RAT Retinol-binding protein 4 OS=Rattus norvegicus OX=10116 GN=Rbp4 PE=1 SV=1	30.8	23.22	172660	276980	141560	160050	276470	331790	224490	174860	0	103660	110340	80475	62226	129950	0	99120
452	P04937-3;P04937;P04937-4;P04937-2	P04937-3;P04937;P04937-4;P04937-2	Fibronectin;Anastellin	Fn1	sp|P04937-3|FINC_RAT Isoform 3 of Fibronectin OS=Rattus norvegicus OX=10116 GN=Fn1;sp|P04937|FINC_RAT Fibronectin OS=Rattus norvegicus OX=10116 GN=Fn1 PE=1 SV=2;sp|P04937-4|FINC_RAT Isoform 4 of Fibronectin OS=Rattus norvegicus OX=10116 GN=Fn1;sp|P04937-2|	21.1	269.79	1713900	2096500	2097700	1655900	1606400	1671500	1851700	1795500	2394900	2478600	1805700	1745400	2060800	2373400	2046300	1690500
453	P04961	P04961	Proliferating cell nuclear antigen	Pcna	sp|P04961|PCNA_RAT Proliferating cell nuclear antigen OS=Rattus norvegicus OX=10116 GN=Pcna PE=1 SV=1	65.5	28.748	1900500	2089000	4921000	1602200	1670300	1618300	1644400	1711700	1231400	1258700	1006500	940290	1017100	1271900	1164700	950680
454	P05065;P00884	P05065	Fructose-bisphosphate aldolase A	Aldoa	sp|P05065|ALDOA_RAT Fructose-bisphosphate aldolase A OS=Rattus norvegicus OX=10116 GN=Aldoa PE=1 SV=2	91.5	39.351	98212000	114640000	93988000	90174000	89396000	87572000	89216000	86567000	88208000	101850000	96946000	82721000	91617000	107170000	87796000	86066000
455	P05197	P05197	Elongation factor 2	Eef2	sp|P05197|EF2_RAT Elongation factor 2 OS=Rattus norvegicus OX=10116 GN=Eef2 PE=1 SV=4	73.4	95.283	31773000	35054000	25242000	28899000	29643000	31099000	29460000	29991000	27748000	31784000	30487000	27437000	27983000	31788000	29165000	28779000
456	P05369	P05369	Farnesyl pyrophosphate synthase	Fdps	sp|P05369|FPPS_RAT Farnesyl pyrophosphate synthase OS=Rattus norvegicus OX=10116 GN=Fdps PE=2 SV=2	24.9	40.829	157330	201170	137710	165420	177440	128240	182530	174630	176240	144620	109660	72947	138350	155170	153500	117120
457	P05370	P05370	Glucose-6-phosphate 1-dehydrogenase	G6pdx	sp|P05370|G6PD_RAT Glucose-6-phosphate 1-dehydrogenase OS=Rattus norvegicus OX=10116 GN=G6pdx PE=1 SV=3	12.2	59.375	1035400	540420	1872000	193370	326600	506550	280940	270620	0	497760	1721400	1135100	1534400	1300900	0	0
458	P05371	P05371	Clusterin;Clusterin beta chain;Clusterin alpha chain	Clu	sp|P05371|CLUS_RAT Clusterin OS=Rattus norvegicus OX=10116 GN=Clu PE=1 SV=2	29.5	51.375	605930	863740	804480	585680	588830	649920	692810	563420	803380	1118900	829000	649790	881590	970400	793150	637120
459	P05426	P05426	60S ribosomal protein L7	Rpl7	sp|P05426|RL7_RAT 60S ribosomal protein L7 OS=Rattus norvegicus OX=10116 GN=Rpl7 PE=1 SV=2	56.9	30.329	3460600	2887400	3095700	3183000	3104400	3731300	3037900	2766400	2958000	3339100	3703400	3542900	3877800	2957300	3635400	3603300
460	P05503	P05503	Cytochrome c oxidase subunit 1	Mtco1	sp|P05503|COX1_RAT Cytochrome c oxidase subunit 1 OS=Rattus norvegicus OX=10116 GN=Mtco1 PE=2 SV=3	11.1	56.844	912330	608230	0	677620	788360	868760	866350	632850	886980	0	1716000	1404700	1102200	657550	1252700	938100
461	P05505	P05505	Cytochrome c oxidase subunit 3	Mtco3	sp|P05505|COX3_RAT Cytochrome c oxidase subunit 3 OS=Rattus norvegicus OX=10116 GN=Mtco3 PE=1 SV=5	5.4	29.87	1157800	0	0	893310	510170	0	0	627970	1331000	2902800	806870	0	1827000	2853300	1019600	1553800
462	P05506	P05506	NADH-ubiquinone oxidoreductase chain 3	Mtnd3	sp|P05506|NU3M_RAT NADH-ubiquinone oxidoreductase chain 3 OS=Rattus norvegicus OX=10116 GN=Mtnd3 PE=3 SV=3	13	13.086	0	0	0	0	0	0	0	0	0	0	0	0	0	0	321580	0
463	P05507	P05507	NADH-ubiquinone oxidoreductase chain 4L	Mtnd4l	sp|P05507|NU4LM_RAT NADH-ubiquinone oxidoreductase chain 4L OS=Rattus norvegicus OX=10116 GN=Mtnd4l PE=3 SV=3	18.4	10.659	0	0	0	0	0	0	0	0	0	0	0	0	0	0	0	33098
464	P05508	P05508	NADH-ubiquinone oxidoreductase chain 4	Mtnd4	sp|P05508|NU4M_RAT NADH-ubiquinone oxidoreductase chain 4 OS=Rattus norvegicus OX=10116 GN=Mtnd4 PE=3 SV=3	15.9	51.782	2421000	2810600	860770	2270800	1949900	1813100	2068700	1737200	2889100	3283500	2265300	2607000	2546900	3430300	2468100	2834500
465	P05544;P09005	P05544	Serine protease inhibitor A3L	Serpina3l	sp|P05544|SPA3L_RAT Serine protease inhibitor A3L OS=Rattus norvegicus OX=10116 GN=Serpina3l PE=1 SV=3	54.5	46.277	4340900	5306400	6588800	4105600	5551200	3593100	3900000	5065800	5261100	3098100	1521500	1069200	1281400	2078800	1140500	1477300
466	P05545	P05545	Serine protease inhibitor A3K	Serpina3k	sp|P05545|SPA3K_RAT Serine protease inhibitor A3K OS=Rattus norvegicus OX=10116 GN=Serpina3k PE=1 SV=3	51	46.561	4489900	5123000	5921700	3958000	6610700	4242400	3998300	5337900	3896400	2382900	1354900	1209000	1018200	1818500	1051200	1741800
467	P05696;P63319;P68403;P68403-2	P05696	Protein kinase C alpha type	Prkca	sp|P05696|KPCA_RAT Protein kinase C alpha type OS=Rattus norvegicus OX=10116 GN=Prkca PE=1 SV=3	13.7	76.791	285940	227000	438500	248320	224540	244650	193990	236840	194360	296560	305220	233190	324570	226570	299490	276810
468	P05708;P27926	P05708	Hexokinase-1	Hk1	sp|P05708|HXK1_RAT Hexokinase-1 OS=Rattus norvegicus OX=10116 GN=Hk1 PE=1 SV=4	59.7	102.41	14184000	13392000	8375200	13932000	12672000	13552000	13508000	13853000	12385000	13220000	16818000	16125000	14230000	13982000	15202000	15728000
469	P05712	P05712	Ras-related protein Rab-2A	Rab2a	sp|P05712|RAB2A_RAT Ras-related protein Rab-2A OS=Rattus norvegicus OX=10116 GN=Rab2a PE=2 SV=1	60.8	23.535	1812000	1807200	2977700	1934300	1699500	2105600	1866600	1525500	1704800	2068500	2251100	2206500	2279200	1735400	2049000	1957600
470	P05714	P05714	Ras-related protein Rab-4A	Rab4a	sp|P05714|RAB4A_RAT Ras-related protein Rab-4A OS=Rattus norvegicus OX=10116 GN=Rab4a PE=1 SV=3	43.6	24.408	204160	217000	220770	196760	177820	197150	206390	217540	236180	224170	74521	244500	218810	232780	270530	203900
471	P05765	P05765	40S ribosomal protein S21	Rps21	sp|P05765|RS21_RAT 40S ribosomal protein S21 OS=Rattus norvegicus OX=10116 GN=Rps21 PE=1 SV=1	60.2	9.1272	2572000	2958800	7037100	2282700	2437100	2412600	2185300	2798700	3076500	3125100	2532500	2495400	2695000	3346600	2806000	2439300
472	P05942	P05942	Protein S100-A4	S100a4	sp|P05942|S10A4_RAT Protein S100-A4 OS=Rattus norvegicus OX=10116 GN=S100a4 PE=2 SV=1	33.7	11.776	436590	0	0	706600	400880	598960	819250	678720	232940	352560	530510	986190	850540	195550	466990	802890
473	P05943	P05943	Protein S100-A10	S100a10	sp|P05943|S10AA_RAT Protein S100-A10 OS=Rattus norvegicus OX=10116 GN=S100a10 PE=1 SV=2	53.7	11.075	2087000	2905600	919620	2040800	2567200	2343100	2579800	2075600	2054500	2466100	3024800	2326100	2686800	2999200	3006200	2135900
474	P05964	P05964	Protein S100-A6	S100a6	sp|P05964|S10A6_RAT Protein S100-A6 OS=Rattus norvegicus OX=10116 GN=S100a6 PE=1 SV=3	51.7	10.035	237960	157320	453930	159040	174490	161470	188740	221840	197530	86596	263780	194200	239750	166870	173770	225530
475	P06214	P06214	Delta-aminolevulinic acid dehydratase	Alad	sp|P06214|HEM2_RAT Delta-aminolevulinic acid dehydratase OS=Rattus norvegicus OX=10116 GN=Alad PE=1 SV=1	50	36.031	559410	438130	496000	490090	424920	513880	562720	588250	585680	667590	844570	685500	713970	718940	600870	659150
476	P06238	P06238	Alpha-2-macroglobulin	A2m	sp|P06238|A2MG_RAT Alpha-2-macroglobulin OS=Rattus norvegicus OX=10116 GN=A2m PE=2 SV=2	29.3	163.78	637260	722520	826210	866590	546660	752050	534920	557900	853590	2513500	1615700	2144400	1535400	1773400	1213100	1475900
477	P06302	P06302	Prothymosin alpha;Prothymosin alpha, N-terminally processed;Thymosin alpha	Ptma	sp|P06302|PTMA_RAT Prothymosin alpha OS=Rattus norvegicus OX=10116 GN=Ptma PE=1 SV=2	39.3	12.382	1697600	1304600	5247900	1321800	1074000	1262500	1237000	1382400	884990	1219100	1098600	1175800	1342700	919100	1461100	1104300
478	P06399;P06399-2;CON__P02672	P06399;P06399-2	Fibrinogen alpha chain;Fibrinopeptide A;Fibrinogen alpha chain	Fga	sp|P06399|FIBA_RAT Fibrinogen alpha chain OS=Rattus norvegicus OX=10116 GN=Fga PE=1 SV=3;sp|P06399-2|FIBA_RAT Isoform 2 of Fibrinogen alpha chain OS=Rattus norvegicus OX=10116 GN=Fga	40.4	86.685	4158300	4884000	5918600	3610400	5009400	4887200	4624200	4212600	4997500	2635900	2700900	2437900	2600500	3236400	2837600	2498700
479	P06536-2;P06536	P06536-2;P06536	Glucocorticoid receptor	Nr3c1	sp|P06536-2|GCR_RAT Isoform B of Glucocorticoid receptor OS=Rattus norvegicus OX=10116 GN=Nr3c1;sp|P06536|GCR_RAT Glucocorticoid receptor OS=Rattus norvegicus OX=10116 GN=Nr3c1 PE=1 SV=2	10	84.833	93605	106810	96432	112480	65387	79067	102100	77063	68783	117010	74378	77248	90088	143240	87995	131110
480	P06685	P06685	Sodium/potassium-transporting ATPase subunit alpha-1	Atp1a1	sp|P06685|AT1A1_RAT Sodium/potassium-transporting ATPase subunit alpha-1 OS=Rattus norvegicus OX=10116 GN=Atp1a1 PE=1 SV=1	50.3	113.05	22481000	28082000	30055000	24290000	22738000	23567000	23389000	21946000	28445000	28510000	27659000	25408000	26180000	28938000	26376000	26162000
481	P06686;Q64541;P54708-2;P54708;P09626	P06686	Sodium/potassium-transporting ATPase subunit alpha-2	Atp1a2	sp|P06686|AT1A2_RAT Sodium/potassium-transporting ATPase subunit alpha-2 OS=Rattus norvegicus OX=10116 GN=Atp1a2 PE=1 SV=1	37.8	112.22	764410	948360	1311600	796980	751310	788410	648770	819100	1172300	751160	755380	624480	507230	706780	566180	714620
482	P06687	P06687	Sodium/potassium-transporting ATPase subunit alpha-3	Atp1a3	sp|P06687|AT1A3_RAT Sodium/potassium-transporting ATPase subunit alpha-3 OS=Rattus norvegicus OX=10116 GN=Atp1a3 PE=1 SV=2	26.2	111.69	0	0	0	0	0	0	0	0	21877	87203	142200	125620	149260	47066	95372	125010
483	P06759	P06759	Apolipoprotein C-III	Apoc3	sp|P06759|APOC3_RAT Apolipoprotein C-III OS=Rattus norvegicus OX=10116 GN=Apoc3 PE=2 SV=2	23.8	11.117	0	0	0	0	0	0	0	0	291830	0	0	0	0	61053	0	0
484	P06761	P06761	78 kDa glucose-regulated protein	Hspa5	sp|P06761|BIP_RAT Endoplasmic reticulum chaperone BiP OS=Rattus norvegicus OX=10116 GN=Hspa5 PE=1 SV=1	56.9	72.346	17235000	17754000	27772000	16819000	17456000	16609000	17646000	16130000	20745000	24301000	22073000	20179000	21662000	25563000	21148000	21055000
485	P06766	P06766	DNA polymerase beta	Polb	sp|P06766|DPOLB_RAT DNA polymerase beta OS=Rattus norvegicus OX=10116 GN=Polb PE=1 SV=4	11.3	38.326	497710	414530	0	558850	575550	571140	0	438270	0	0	913560	567690	589740	0	525390	177680
486	P06866;P06866-2	P06866;P06866-2	Haptoglobin;Haptoglobin alpha chain;Haptoglobin beta chain	Hp	sp|P06866|HPT_RAT Haptoglobin OS=Rattus norvegicus OX=10116 GN=Hp PE=1 SV=3;sp|P06866-2|HPT_RAT Isoform 2 of Haptoglobin OS=Rattus norvegicus OX=10116 GN=Hp	40.3	38.563	683360	1563100	1058400	705200	795870	1224900	885550	909970	352920	2140300	2041900	1250900	1557200	3443600	758530	1339500
487	P07150	P07150	Annexin A1	Anxa1	sp|P07150|ANXA1_RAT Annexin A1 OS=Rattus norvegicus OX=10116 GN=Anxa1 PE=1 SV=2	54.3	38.829	2080800	2345800	2551700	1984300	2080400	1837000	2356300	2263100	2214200	2797400	1858700	1839300	1874500	2155500	1837800	1736800
488	P07151	P07151	Beta-2-microglobulin	B2m	sp|P07151|B2MG_RAT Beta-2-microglobulin OS=Rattus norvegicus OX=10116 GN=B2m PE=1 SV=1	50.4	13.72	272980	354290	111040	272030	281360	332290	336410	143660	370380	188020	270110	200010	26801	0	226390	161650
489	P07153	P07153	Dolichyl-diphosphooligosaccharide--protein glycosyltransferase subunit 1	Rpn1	sp|P07153|RPN1_RAT Dolichyl-diphosphooligosaccharide--protein glycosyltransferase subunit 1 OS=Rattus norvegicus OX=10116 GN=Rpn1 PE=2 SV=1	48.1	68.303	2440700	2873600	4195200	2255700	2346900	2203600	2130200	2221900	2873800	3945300	3369400	2985900	3044500	3584400	3036600	2684300
490	P07154	P07154	Cathepsin L1;Procathepsin L;Cathepsin L1 heavy chain;Cathepsin L1 light chain	Ctsl	sp|P07154|CATL1_RAT Procathepsin L OS=Rattus norvegicus OX=10116 GN=Ctsl PE=1 SV=2	33.8	37.66	350880	355770	303350	353030	259780	323110	357030	302760	496830	499350	457920	357950	453240	336490	457030	355270
491	P07323	P07323	Gamma-enolase	Eno2	sp|P07323|ENOG_RAT Gamma-enolase OS=Rattus norvegicus OX=10116 GN=Eno2 PE=1 SV=2	60.6	47.14	172470	313020	125530	282610	213870	272620	342810	217330	96475	530370	303070	249980	365850	456270	466380	311030
492	P07335	P07335	Creatine kinase B-type	Ckb	sp|P07335|KCRB_RAT Creatine kinase B-type OS=Rattus norvegicus OX=10116 GN=Ckb PE=1 SV=2	74.5	42.725	11078000	10786000	5939200	12917000	11213000	10109000	13921000	12516000	18021000	7813700	10693000	11246000	11282000	8809500	9775800	14542000
493	P07340	P07340	Sodium/potassium-transporting ATPase subunit beta-1	Atp1b1	sp|P07340|AT1B1_RAT Sodium/potassium-transporting ATPase subunit beta-1 OS=Rattus norvegicus OX=10116 GN=Atp1b1 PE=1 SV=1	43.4	35.201	6077600	7769600	7518500	6253300	5976800	6148200	5651000	5431800	6865300	8250500	6546800	6054500	6455700	7063900	6509300	6981200
494	P07483	P07483	Fatty acid-binding protein, heart	Fabp3	sp|P07483|FABPH_RAT Fatty acid-binding protein, heart OS=Rattus norvegicus OX=10116 GN=Fabp3 PE=1 SV=2	94.7	14.775	43321000	44146000	24235000	54024000	45900000	49406000	54347000	48841000	52636000	32788000	48393000	52370000	47295000	38511000	41518000	51035000
495	P07632	P07632	Superoxide dismutase [Cu-Zn]	Sod1	sp|P07632|SODC_RAT Superoxide dismutase [Cu-Zn] OS=Rattus norvegicus OX=10116 GN=Sod1 PE=1 SV=2	60.4	15.911	10331000	11319000	13132000	10039000	9903500	10455000	9793400	9655300	7100300	7364900	7962600	7329300	7958400	8821500	8788200	8526200
496	P07633	P07633	Propionyl-CoA carboxylase beta chain, mitochondrial	Pccb	sp|P07633|PCCB_RAT Propionyl-CoA carboxylase beta chain, mitochondrial OS=Rattus norvegicus OX=10116 GN=Pccb PE=2 SV=1	66.2	58.626	6979400	8189100	10994000	8156100	8080700	7949200	8389700	6453300	9265100	6141000	8058200	6667100	6631200	6843900	6724900	7074600
497	P07687	P07687	Epoxide hydrolase 1	Ephx1	sp|P07687|HYEP_RAT Epoxide hydrolase 1 OS=Rattus norvegicus OX=10116 GN=Ephx1 PE=1 SV=1	9.5	52.581	101740	157500	0	0	74318	111980	167370	82899	167330	201570	154190	155990	148630	152590	159290	96644
498	P07808	P07808	Pro-neuropeptide Y;Neuropeptide Y;C-flanking peptide of NPY	Npy	sp|P07808|NPY_RAT Pro-neuropeptide Y OS=Rattus norvegicus OX=10116 GN=Npy PE=1 SV=1	13.3	11.033	0	0	0	0	0	0	0	0	0	0	0	0	0	0	0	20609
499	P07825	P07825	Synaptophysin	Syp	sp|P07825|SYPH_RAT Synaptophysin OS=Rattus norvegicus OX=10116 GN=Syp PE=1 SV=1	4.6	33.31	0	0	0	0	0	0	0	0	0	0	0	0	0	0	0	22138
500	P07872	P07872	Peroxisomal acyl-coenzyme A oxidase 1;Peroxisomal acyl-CoA oxidase 1, A chain;Peroxisomal acyl-CoA oxidase 1, B chain;Peroxisomal acyl-CoA oxidase 1, C chain	Acox1	sp|P07872|ACOX1_RAT Peroxisomal acyl-coenzyme A oxidase 1 OS=Rattus norvegicus OX=10116 GN=Acox1 PE=1 SV=1	37.4	74.678	0	0	0	0	0	0	0	0	0	0	0	0	0	0	0	6448.9
501	P07872-2	P07872-2	Peroxisomal acyl-coenzyme A oxidase 1;Peroxisomal acyl-CoA oxidase 1, A chain;Peroxisomal acyl-CoA oxidase 1, B chain;Peroxisomal acyl-CoA oxidase 1, C chain	Acox1	sp|P07872-2|ACOX1_RAT Isoform 2 of Peroxisomal acyl-coenzyme A oxidase 1 OS=Rattus norvegicus OX=10116 GN=Acox1	36.8	74.69	1167200	1457200	787750	1369000	1166300	1249300	1097600	1181600	1356300	1510200	1185600	1069500	1269900	1300500	1327900	964080
502	P07895	P07895	Superoxide dismutase [Mn], mitochondrial	Sod2	sp|P07895|SODM_RAT Superoxide dismutase [Mn], mitochondrial OS=Rattus norvegicus OX=10116 GN=Sod2 PE=1 SV=2	75.2	24.674	5794700	5891200	1477500	6337600	5474400	5869600	6065600	5038900	5058500	4935600	5974800	5639700	5500600	5621100	4608000	5178200
503	P07896	P07896	Peroxisomal bifunctional enzyme;Enoyl-CoA hydratase/3,2-trans-enoyl-CoA isomerase;3-hydroxyacyl-CoA dehydrogenase	Ehhadh	sp|P07896|ECHP_RAT Peroxisomal bifunctional enzyme OS=Rattus norvegicus OX=10116 GN=Ehhadh PE=1 SV=2	14.5	78.657	154870	178730	138670	206510	95409	143370	176370	94814	105740	192670	125930	97694	66687	172280	170820	102280
504	P07936	P07936	Neuromodulin	Gap43	sp|P07936|NEUM_RAT Neuromodulin OS=Rattus norvegicus OX=10116 GN=Gap43 PE=1 SV=1	10.2	23.603	0	0	0	0	0	0	0	0	0	0	0	0	0	0	0	29672
505	P07943	P07943	Aldose reductase	Akr1b1	sp|P07943|ALDR_RAT Aldo-keto reductase family 1 member B1 OS=Rattus norvegicus OX=10116 GN=Akr1b1 PE=1 SV=3	81.3	35.797	11041000	11979000	6395000	11846000	11805000	11399000	11561000	11087000	8999800	10721000	10817000	10365000	12559000	9026200	11860000	10774000
506	P08009	P08009	Glutathione S-transferase Yb-3	Gstm3	sp|P08009|GSTM7_RAT Glutathione S-transferase Mu 7 OS=Rattus norvegicus OX=10116 GN=Gstm7 PE=1 SV=2	78.4	25.68	1246600	1195200	1108200	1510600	1457300	1689200	1651600	1337200	1527500	774520	1005600	951800	859210	732940	1062200	1058700
507	P08010	P08010	Glutathione S-transferase Mu 2	Gstm2	sp|P08010|GSTM2_RAT Glutathione S-transferase Mu 2 OS=Rattus norvegicus OX=10116 GN=Gstm2 PE=1 SV=2	81.2	25.702	5103300	5430800	2216300	6358900	6793700	6553700	6899200	6629300	5775400	2943900	3332000	3190300	2981800	3048500	3180300	3437800
508	P08050	P08050	Gap junction alpha-1 protein	Gja1	sp|P08050|CXA1_RAT Gap junction alpha-1 protein OS=Rattus norvegicus OX=10116 GN=Gja1 PE=1 SV=2	44	43.031	4222400	5931400	5289200	4570900	3743500	4556300	4155300	3698900	4857300	6385100	4025000	4306700	4589000	6146800	5031000	4670000
509	P08081-2;P08081	P08081-2;P08081	Clathrin light chain A	Clta	sp|P08081-2|CLCA_RAT Isoform Non-brain of Clathrin light chain A OS=Rattus norvegicus OX=10116 GN=Clta;sp|P08081|CLCA_RAT Clathrin light chain A OS=Rattus norvegicus OX=10116 GN=Clta PE=1 SV=1	21.6	23.565	446340	519840	1020400	426040	332560	197500	357500	388850	271070	272760	652720	466730	387080	377410	438380	326780
510	P08082-2;P08082	P08082-2;P08082	Clathrin light chain B	Cltb	sp|P08082-2|CLCB_RAT Isoform Non-brain of Clathrin light chain B OS=Rattus norvegicus OX=10116 GN=Cltb;sp|P08082|CLCB_RAT Clathrin light chain B OS=Rattus norvegicus OX=10116 GN=Cltb PE=1 SV=1	30.8	23.12	823850	986160	1157200	640570	598450	621260	639280	674070	616870	1059900	864720	658600	778580	985790	914720	755480
511	P08289	P08289	Alkaline phosphatase, tissue-nonspecific isozyme	Alpl	sp|P08289|PPBT_RAT Alkaline phosphatase, tissue-nonspecific isozyme OS=Rattus norvegicus OX=10116 GN=Alpl PE=1 SV=2	15.3	57.659	37152	0	93153	0	0	0	0	45060	80843	0	100310	56601	76392	0	71051	81082
512	P08430;Q64634;Q64638;Q64637;Q64633;P20720;Q64550	P08430;Q64634;Q64638;Q64637;Q64633;P20720;Q64550	UDP-glucuronosyltransferase 1-6;UDP-glucuronosyltransferase 1-8;UDP-glucuronosyltransferase 1-5;UDP-glucuronosyltransferase 1-3;UDP-glucuronosyltransferase 1-7;UDP-glucuronosyltransferase 1-2;UDP-glucuronosyltransferase 1-1	Ugt1a6;Ugt1a8;Ugt1a5;Ugt1a3;Ugt1a7c;Ugt1a2;Ugt1a1	sp|P08430|UD16_RAT UDP-glucuronosyltransferase 1-6 OS=Rattus norvegicus OX=10116 GN=Ugt1a6 PE=1 SV=1;sp|Q64634|UD18_RAT UDP-glucuronosyltransferase 1A8 OS=Rattus norvegicus OX=10116 GN=Ugt1a8 PE=2 SV=1;sp|Q64638|UD15_RAT UDP-glucuronosyltransferase 1A5 OS=	4	60.131	0	0	0	0	0	0	0	0	0	0	0	0	0	0	0	62082
513	P08460	P08460	Nidogen-1	Nid1	sp|P08460|NID1_RAT Nidogen-1 (Fragment) OS=Rattus norvegicus OX=10116 GN=Nid1 PE=1 SV=2	41	35.661	1291000	1147300	867480	963000	909230	1003800	1070000	1166600	1320600	1311100	1301900	1034800	1195800	1178500	1118300	1219400
514	P08461	P08461	Dihydrolipoyllysine-residue acetyltransferase component of pyruvate dehydrogenase complex, mitochondrial	Dlat	sp|P08461|ODP2_RAT Dihydrolipoyllysine-residue acetyltransferase component of pyruvate dehydrogenase complex, mitochondrial OS=Rattus norvegicus OX=10116 GN=Dlat PE=1 SV=3	47.6	67.165	24248000	24162000	25805000	23963000	21905000	23550000	23761000	23965000	27788000	24650000	25929000	25818000	23938000	25255000	25255000	24135000
515	P08503	P08503	Medium-chain specific acyl-CoA dehydrogenase, mitochondrial	Acadm	sp|P08503|ACADM_RAT Medium-chain specific acyl-CoA dehydrogenase, mitochondrial OS=Rattus norvegicus OX=10116 GN=Acadm PE=1 SV=1	62.5	46.555	25622000	29959000	31952000	24936000	33563000	28409000	27515000	25431000	26593000	25315000	33520000	29796000	26659000	31822000	26952000	29644000
516	P08592-2;P08592	P08592-2;P08592	Amyloid beta A4 protein;N-APP;Soluble APP-alpha;Soluble APP-beta;C99;Beta-amyloid protein 42;Beta-amyloid protein 40;C83;P3(42);P3(40);C80;Gamma-secretase C-terminal fragment 59;Gamma-secretase C-terminal fragment 57;Gamma-secretase C-terminal fragment 50;C31	App	sp|P08592-2|A4_RAT Isoform APP695 of Amyloid-beta A4 protein OS=Rattus norvegicus OX=10116 GN=App;sp|P08592|A4_RAT Amyloid-beta A4 protein OS=Rattus norvegicus OX=10116 GN=App PE=1 SV=2	5.8	78.482	0	65257	295810	51400	0	0	48156	0	0	0	0	0	0	0	54919	0
517	P08644-2;P08644	P08644-2;P08644	GTPase KRas;GTPase KRas, N-terminally processed	Kras	sp|P08644-2|RASK_RAT Isoform 2B of GTPase KRas OS=Rattus norvegicus OX=10116 GN=Kras;sp|P08644|RASK_RAT GTPase KRas OS=Rattus norvegicus OX=10116 GN=Kras PE=1 SV=3	56.9	21.494	21270	19319	629300	0	0	0	30492	0	0	0	0	0	0	0	0	0
518	P08649	P08649	Complement C4;Complement C4 beta chain;Complement C4 alpha chain;C4a anaphylatoxin;Complement C4 gamma chain	C4	sp|P08649|CO4_RAT Complement C4 OS=Rattus norvegicus OX=10116 GN=C4 PE=1 SV=3	28	192.16	1457500	2079500	3106400	1668700	1988100	2033500	1882100	2163100	2482600	2027200	1790700	1298800	1628800	2282100	1651900	1820900
519	P08699	P08699	Galectin-3	Lgals3	sp|P08699|LEG3_RAT Galectin-3 OS=Rattus norvegicus OX=10116 GN=Lgals3 PE=1 SV=4	12.2	27.201	118620	74161	0	74836	122680	63371	39149	115780	99490	78481	200920	191740	120940	139290	152890	205660
520	P08733	P08733	Myosin regulatory light chain 2, ventricular/cardiac muscle isoform	Myl2	sp|P08733|MLRV_RAT Myosin regulatory light chain 2, ventricular/cardiac muscle isoform OS=Rattus norvegicus OX=10116 GN=Myl2 PE=1 SV=2	95.8	18.88	188590000	180920000	90932000	195400000	219530000	198880000	191750000	221450000	226820000	155830000	221200000	212450000	193110000	223090000	195980000	204170000
521	P08753	P08753	Guanine nucleotide-binding protein G(k) subunit alpha	Gnai3	sp|P08753|GNAI3_RAT Guanine nucleotide-binding protein G(i) subunit alpha-3 OS=Rattus norvegicus OX=10116 GN=Gnai3 PE=1 SV=3	17.8	40.522	156500	208860	220040	131250	148100	146280	138580	140260	158210	266250	207840	193920	192270	166450	193290	158070
522	P08932	P08932	T-kininogen 2;T-kininogen 2 heavy chain;T-kinin;T-kininogen 2 light chain		sp|P08932|KNT2_RAT T-kininogen 2 OS=Rattus norvegicus OX=10116 PE=1 SV=2	47.9	47.704	1742100	2089700	1777800	1603200	1481700	1902100	1676500	1363200	1524500	2552200	2003900	2018000	1828400	2056800	2123200	2156600
523	P08934	P08934	Kininogen-1;Kininogen-1 heavy chain;Bradykinin;Kininogen-1 light chain	Kng1	sp|P08934|KNG1_RAT Kininogen-1 OS=Rattus norvegicus OX=10116 GN=Kng1 PE=2 SV=1	22.8	70.932	184180	301540	426640	181720	199680	245800	226300	215690	306690	341740	237310	181360	234610	364140	187920	240180
524	P09006	P09006	Serine protease inhibitor A3N	Serpina3n	sp|P09006|SPA3N_RAT Serine protease inhibitor A3N OS=Rattus norvegicus OX=10116 GN=Serpina3n PE=1 SV=3	44.3	46.651	1164700	1552300	2295400	1158900	1453800	1373700	1321100	1366100	1183500	1370700	1274200	899690	1161500	1488700	1107300	1170600
525	P09117	P09117	Fructose-bisphosphate aldolase C	Aldoc	sp|P09117|ALDOC_RAT Fructose-bisphosphate aldolase C OS=Rattus norvegicus OX=10116 GN=Aldoc PE=1 SV=3	34.7	39.283	0	0	0	0	96510	38066	58615	62707	42943	196540	79939	68756	120890	172820	165730	59412
526	P09215;P09215-2	P09215;P09215-2	Protein kinase C delta type;Protein kinase C delta type regulatory subunit;Protein kinase C delta type catalytic subunit	Prkcd	sp|P09215|KPCD_RAT Protein kinase C delta type OS=Rattus norvegicus OX=10116 GN=Prkcd PE=1 SV=1;sp|P09215-2|KPCD_RAT Isoform 2 of Protein kinase C delta type OS=Rattus norvegicus OX=10116 GN=Prkcd	20.4	77.519	144270	134190	180330	106190	80559	100640	130740	145890	233050	459190	296390	158300	235570	332480	293190	166560
527	P09216	P09216	Protein kinase C epsilon type	Prkce	sp|P09216|KPCE_RAT Protein kinase C epsilon type OS=Rattus norvegicus OX=10116 GN=Prkce PE=1 SV=1	4.7	83.478	0	0	0	55834	0	56922	51358	0	0	0	57733	0	54449	0	0	0
528	P09217-2;P09217	P09217-2;P09217	Protein kinase C zeta type	Prkcz	sp|P09217-2|KPCZ_RAT Isoform 2 of Protein kinase C zeta type OS=Rattus norvegicus OX=10116 GN=Prkcz;sp|P09217|KPCZ_RAT Protein kinase C zeta type OS=Rattus norvegicus OX=10116 GN=Prkcz PE=1 SV=2	2.2	46.6	0	0	0	0	0	0	0	0	0	0	0	0	0	0	1458300	0
529	P09330	P09330	Ribose-phosphate pyrophosphokinase 2	Prps2	sp|P09330|PRPS2_RAT Ribose-phosphate pyrophosphokinase 2 OS=Rattus norvegicus OX=10116 GN=Prps2 PE=1 SV=3	23	34.813	0	0	0	0	0	0	0	0	0	0	0	0	0	0	0	31959
530	P09414	P09414	Nuclear factor 1 A-type	Nfia	sp|P09414|NFIA_RAT Nuclear factor 1 A-type OS=Rattus norvegicus OX=10116 GN=Nfia PE=1 SV=2	16.1	55.976	0	86658	90937	0	78360	0	0	66258	0	150360	62126	57804	70994	100360	94408	24380
531	P09456;P81377	P09456	cAMP-dependent protein kinase type I-alpha regulatory subunit;cAMP-dependent protein kinase type I-alpha regulatory subunit, N-terminally processed	Prkar1a	sp|P09456|KAP0_RAT cAMP-dependent protein kinase type I-alpha regulatory subunit OS=Rattus norvegicus OX=10116 GN=Prkar1a PE=1 SV=2	52.8	43.094	5298600	5110900	6280700	5791600	6211200	6058900	5241400	5608800	5841100	5685500	7929700	7522000	6027400	5969600	6511400	7126000
532	P09495	P09495	Tropomyosin alpha-4 chain	Tpm4	sp|P09495|TPM4_RAT Tropomyosin alpha-4 chain OS=Rattus norvegicus OX=10116 GN=Tpm4 PE=1 SV=3	80.2	28.509	3138300	3934700	3636000	2592700	3059300	2666300	3018800	2886400	2869800	3459900	2523000	2163700	2407300	3351900	2677000	2439000
533	P09527	P09527	Ras-related protein Rab-7a	Rab7a	sp|P09527|RAB7A_RAT Ras-related protein Rab-7a OS=Rattus norvegicus OX=10116 GN=Rab7a PE=1 SV=2	69.1	23.504	1739800	1936400	2283400	1738000	1785900	1864700	1656200	1463700	1709400	2518300	2013600	1780800	1652100	2366000	1726900	1815500
534	P09605;P25809	P09605	Creatine kinase S-type, mitochondrial	Ckmt2	sp|P09605|KCRS_RAT Creatine kinase S-type, mitochondrial OS=Rattus norvegicus OX=10116 GN=Ckmt2 PE=1 SV=2	72.1	47.385	45954000	60156000	47027000	57361000	71050000	49912000	46559000	54912000	97715000	28868000	32480000	38109000	19958000	36428000	15298000	48090000
535	P09606	P09606	Glutamine synthetase	Glul	sp|P09606|GLNA_RAT Glutamine synthetase OS=Rattus norvegicus OX=10116 GN=Glul PE=1 SV=3	17.2	42.267	0	324500	0	323520	185080	204460	244250	0	178900	213280	159800	164210	87682	171030	159770	166700
536	P09811	P09811	Glycogen phosphorylase, liver form	Pygl	sp|P09811|PYGL_RAT Glycogen phosphorylase, liver form OS=Rattus norvegicus OX=10116 GN=Pygl PE=1 SV=5	8	97.482	0	0	0	0	275350	0	0	0	0	0	0	0	0	0	0	0
537	P09812	P09812	Glycogen phosphorylase, muscle form	Pygm	sp|P09812|PYGM_RAT Glycogen phosphorylase, muscle form OS=Rattus norvegicus OX=10116 GN=Pygm PE=1 SV=5	60.6	97.272	41538000	47837000	41345000	41155000	39807000	41972000	42251000	37748000	38602000	37706000	38086000	35770000	34553000	39264000	36170000	39231000
538	P09895	P09895	60S ribosomal protein L5	Rpl5	sp|P09895|RL5_RAT 60S ribosomal protein L5 OS=Rattus norvegicus OX=10116 GN=Rpl5 PE=1 SV=3	63	34.458	3516300	4036300	3500800	3389900	3255700	3696600	3406000	3293300	4028100	4782700	3783700	3630600	3336000	4330400	4098400	3663300
539	P0C089	P0C089	Phosphatidylglycerophosphatase and protein-tyrosine phosphatase 1	Ptpmt1	sp|P0C089|PTPM1_RAT Phosphatidylglycerophosphatase and protein-tyrosine phosphatase 1 OS=Rattus norvegicus OX=10116 GN=Ptpmt1 PE=1 SV=1	44	21.886	601840	715170	1176900	598180	492200	616850	578550	426650	601020	758860	672270	642260	577020	616810	679770	540590
540	P0C0A1	P0C0A1	Vacuolar protein-sorting-associated protein 25	Vps25	sp|P0C0A1|VPS25_RAT Vacuolar protein-sorting-associated protein 25 OS=Rattus norvegicus OX=10116 GN=Vps25 PE=1 SV=1	47.7	20.762	338090	255980	0	394840	365750	409530	421770	539670	324870	397980	332340	507470	405920	113230	280520	422890
541	P0C0A2	P0C0A2	Vacuolar protein-sorting-associated protein 36	Vps36	sp|P0C0A2|VPS36_RAT Vacuolar protein-sorting-associated protein 36 OS=Rattus norvegicus OX=10116 GN=Vps36 PE=1 SV=1	22.5	43.717	108140	155910	77474	149940	111680	149800	137900	110240	146480	165970	95618	69231	121350	115580	102430	101240
542	P0C0S7	P0C0S7	Histone H2A.Z	H2afz	sp|P0C0S7|H2AZ_RAT Histone H2A.Z OS=Rattus norvegicus OX=10116 GN=H2az1 PE=1 SV=2	53.9	13.553	1598700	2312100	1346900	1984200	2162500	1898300	1828900	1971400	2041300	2141900	2520900	2737400	2631500	2636100	2913600	2124400
543	P0C1X8	P0C1X8	AP2-associated protein kinase 1	Aak1	sp|P0C1X8|AAK1_RAT AP2-associated protein kinase 1 OS=Rattus norvegicus OX=10116 GN=Aak1 PE=1 SV=1	18.1	103.76	378050	401750	887390	381420	397570	363840	426670	387460	409810	500640	367820	332590	409030	289260	426990	376040
544	P0C219	P0C219	Sarcolemmal membrane-associated protein	Slmap	sp|P0C219|SLMAP_RAT Sarcolemmal membrane-associated protein OS=Rattus norvegicus OX=10116 GN=Slmap PE=1 SV=1	31.4	98.223	2939100	3525200	3483900	2998000	2990000	3441000	3164900	3063000	2743900	3857700	3730100	3482700	3822500	3524800	3898200	3046400
545	P0C2B9	P0C2B9	28S ribosomal protein L42, mitochondrial	Mrpl42	sp|P0C2B9|RM42_RAT 28S ribosomal protein L42, mitochondrial OS=Rattus norvegicus OX=10116 GN=Mrpl42 PE=1 SV=1	16.3	16.469	113640	141420	173600	99426	0	97543	105820	99039	117300	171920	118040	108140	109690	137120	126420	0
546	P0C2C0	P0C2C0	39S ribosomal protein L22, mitochondrial	Mrpl22	sp|P0C2C0|RM22_RAT 39S ribosomal protein L22, mitochondrial OS=Rattus norvegicus OX=10116 GN=Mrpl22 PE=1 SV=1	29.1	24.039	314390	285580	357810	267770	249920	306660	280900	225860	289930	383270	333660	373080	361540	281400	376560	348660
547	P0C2C4	P0C2C4	39S ribosomal protein L10, mitochondrial	Mrpl10	sp|P0C2C4|RM10_RAT 39S ribosomal protein L10, mitochondrial OS=Rattus norvegicus OX=10116 GN=Mrpl10 PE=1 SV=1	24	29.94	352630	290500	482410	314090	308590	352580	365120	357430	349620	406940	418040	347290	354730	416150	385990	430100
548	P0C2X9	P0C2X9	Delta-1-pyrroline-5-carboxylate dehydrogenase, mitochondrial	Aldh4a1	sp|P0C2X9|AL4A1_RAT Delta-1-pyrroline-5-carboxylate dehydrogenase, mitochondrial OS=Rattus norvegicus OX=10116 GN=Aldh4a1 PE=1 SV=1	39.6	61.868	2906400	3608500	5341900	2817400	3049800	2787000	3050100	3265900	3262600	2159400	2235700	1783700	1759800	2200300	1926800	1921200
549	P0C546	P0C546	Mitochondrial coenzyme A transporter SLC25A42	Slc25a42	sp|P0C546|S2542_RAT Mitochondrial coenzyme A transporter SLC25A42 OS=Rattus norvegicus OX=10116 GN=Slc25a42 PE=2 SV=1	40.3	35.099	821710	998150	552380	820210	898500	937060	1062600	865150	881880	1578600	884560	1107500	785850	1236200	1190400	954970
550	P0C548	P0C548	Patatin-like phospholipase domain-containing protein 2	Pnpla2	sp|P0C548|PLPL2_RAT Patatin-like phospholipase domain-containing protein 2 OS=Rattus norvegicus OX=10116 GN=Pnpla2 PE=1 SV=1	6.1	52.566	0	71858	0	28897	52062	61894	0	75781	66210	104990	63918	69887	0	102520	46880	0
551	P0C588	P0C588	Metal transporter CNNM4	Cnnm4	sp|P0C588|CNNM4_RAT Metal transporter CNNM4 OS=Rattus norvegicus OX=10116 GN=Cnnm4 PE=1 SV=1	3.4	86.691	314260	373650	0	0	0	0	0	214390	372870	0	0	278930	167820	214110	0	0
552	P0C5E3	P0C5E3	Palladin	Palld	sp|P0C5E3|PALLD_RAT Palladin (Fragment) OS=Rattus norvegicus OX=10116 GN=Palld PE=1 SV=1	29.2	66.704	467460	665630	994850	439350	506360	470240	511790	441760	439550	291520	394770	317050	395130	412970	402820	311580
553	P0C5H9	P0C5H9	Mesencephalic astrocyte-derived neurotrophic factor	Manf	sp|P0C5H9|MANF_RAT Mesencephalic astrocyte-derived neurotrophic factor OS=Rattus norvegicus OX=10116 GN=Manf PE=1 SV=1	33	20.388	345410	503160	156850	311830	213430	292950	369260	357410	334470	411030	34227	393330	408840	481470	131760	355140
554	P0C5W1	P0C5W1	Microtubule-associated protein 1S;MAP1S heavy chain;MAP1S light chain	Map1s	sp|P0C5W1|MAP1S_RAT Microtubule-associated protein 1S OS=Rattus norvegicus OX=10116 GN=Map1s PE=1 SV=1	7.5	102.8	170200	130370	348200	136080	100450	130760	133880	148690	135040	259540	160370	177340	174230	215000	124570	140570
555	P0C644	P0C644	Inositol hexakisphosphate and diphosphoinositol-pentakisphosphate kinase 1	Ppip5k1	sp|P0C644|VIP1_RAT Inositol hexakisphosphate and diphosphoinositol-pentakisphosphate kinase 1 OS=Rattus norvegicus OX=10116 GN=Ppip5k1 PE=1 SV=1	1.3	159.62	0	0	0	0	0	0	0	0	0	0	0	0	0	0	0	59027
556	P0C6B1	P0C6B1	Solute carrier family 35 member E1	Slc35e1	sp|P0C6B1|S35E1_RAT Solute carrier family 35 member E1 OS=Rattus norvegicus OX=10116 GN=Slc35e1 PE=3 SV=1	5.9	44.384	0	0	0	0	0	0	0	0	0	0	0	0	0	14336	0	0
557	P0C6C0	P0C6C0	A-kinase anchor protein SPHKAP	Sphkap	sp|P0C6C0|SPKAP_RAT A-kinase anchor protein SPHKAP OS=Rattus norvegicus OX=10116 GN=Sphkap PE=1 SV=1	11.2	184.45	289650	370110	566040	250990	86018	240940	275910	299990	172650	521110	248710	240660	219750	316030	387330	263280
558	P0CB49	P0CB49	YLP motif-containing protein 1	Ylpm1	sp|P0CB49|YLPM1_RAT YLP motif-containing protein 1 OS=Rattus norvegicus OX=10116 GN=Ylpm1 PE=1 SV=1	2.3	154.27	102880	0	107600	101260	110960	0	93268	95743	0	103430	98008	0	93894	141130	113270	101020
559	P0CC09	P0CC09	Histone H2A type 2-A	Hist2h2aa3	sp|P0CC09|H2A2A_RAT Histone H2A type 2-A OS=Rattus norvegicus OX=10116 GN=H2ac18 PE=1 SV=1	58.5	14.095	32406000	36510000	36896000	30298000	31415000	30863000	38541000	37047000	44897000	52900000	38816000	38597000	36679000	47786000	40863000	33913000
560	P0CD94	P0CD94	Ubiquinol-cytochrome-c reductase complex assembly factor 3	Uqcc3	sp|P0CD94|UQCC3_RAT Ubiquinol-cytochrome-c reductase complex assembly factor 3 OS=Rattus norvegicus OX=10116 GN=Uqcc3 PE=3 SV=1	14.6	9.6781	0	0	0	0	0	0	0	0	0	0	0	0	0	110610	0	0
561	P0CE43	P0CE43	Growth factor receptor-bound protein 10	Grb10	sp|P0CE43|GRB10_RAT Growth factor receptor-bound protein 10 OS=Rattus norvegicus OX=10116 GN=Grb10 PE=3 SV=1	12.9	67.882	62229	83689	478760	392770	52718	0	44491	213770	0	97791	0	105010	0	94348	92728	104190
562	P0DKR2	P0DKR2	T-cell activation inhibitor, mitochondrial	Tcaim	sp|P0DKR2|TCAIM_RAT T-cell activation inhibitor, mitochondrial OS=Rattus norvegicus OX=10116 GN=Tcaim PE=2 SV=1	7.9	58.412	0	35581	0	40514	25870	44210	25750	34979	66919	30703	36633	0	0	27526	0	42864
563	P0DMW1;P0DMW0	P0DMW1;P0DMW0	Heat shock 70 kDa protein 1B;Heat shock 70 kDa protein 1A	Hspa1a	sp|P0DMW1|HS71B_RAT Heat shock 70 kDa protein 1B OS=Rattus norvegicus OX=10116 GN=Hspa1b PE=2 SV=1;sp|P0DMW0|HS71A_RAT Heat shock 70 kDa protein 1A OS=Rattus norvegicus OX=10116 GN=Hspa1a PE=2 SV=1	30	70.184	1029800	1221900	1817300	966700	925220	887710	1118100	1131000	1053900	1252500	847380	737150	809740	712530	628410	904790
564	P0DN35	P0DN35			sp|P0DN35|NDUB1_RAT NADH dehydrogenase [ubiquinone] 1 beta subcomplex subunit 1 OS=Rattus norvegicus OX=10116 GN=Ndufb1 PE=3 SV=1	50.9	6.9981	1551300	1677300	937200	1341200	1491000	1419100	1288400	1234700	776670	1792800	1759300	1923400	1259400	1847600	1366200	1728000
565	P0DP31;P0DP30;P0DP29;Q5U206	P0DP31;P0DP30;P0DP29			sp|P0DP31|CALM3_RAT Calmodulin-3 OS=Rattus norvegicus OX=10116 GN=Calm3 PE=1 SV=1;sp|P0DP30|CALM2_RAT Calmodulin-2 OS=Rattus norvegicus OX=10116 GN=Calm2 PE=1 SV=1;sp|P0DP29|CALM1_RAT Calmodulin-1 OS=Rattus norvegicus OX=10116 GN=Calm1 PE=1 SV=1	92.6	16.837	5755200	5321700	5493400	5135200	4045500	4156900	4155200	4381500	5223400	5679100	7124800	5478200	6008300	7926200	7432700	5190500
566	P10111	P10111	Peptidyl-prolyl cis-trans isomerase A;Peptidyl-prolyl cis-trans isomerase A, N-terminally processed	Ppia	sp|P10111|PPIA_RAT Peptidyl-prolyl cis-trans isomerase A OS=Rattus norvegicus OX=10116 GN=Ppia PE=1 SV=2	85.4	17.874	25841000	26678000	29672000	27322000	30424000	28386000	27984000	26322000	28952000	29703000	32196000	30129000	34851000	28238000	34477000	29073000
567	P10252	P10252	CD48 antigen	Cd48	sp|P10252|CD48_RAT CD48 antigen OS=Rattus norvegicus OX=10116 GN=Cd48 PE=1 SV=1	27.1	27.679	277330	470650	136520	366360	308060	380130	369370	308870	345080	485150	452490	366300	391210	432740	476570	340100
568	P10536	P10536	Ras-related protein Rab-1B	Rab1b	sp|P10536|RAB1B_RAT Ras-related protein Rab-1B OS=Rattus norvegicus OX=10116 GN=Rab1b PE=1 SV=1	76.6	22.163	4169600	5186300	6957400	3698800	3460600	3910700	4264200	3871300	5109600	5587500	4992600	4119000	4428800	5748100	4801900	4116400
569	P10686	P10686	1-phosphatidylinositol 4,5-bisphosphate phosphodiesterase gamma-1	Plcg1	sp|P10686|PLCG1_RAT 1-phosphatidylinositol 4,5-bisphosphate phosphodiesterase gamma-1 OS=Rattus norvegicus OX=10116 GN=Plcg1 PE=1 SV=1	20.3	148.55	387990	552920	666370	396040	344160	364530	416900	316160	372060	624370	395800	316950	483930	473300	461370	333740
570	P10688	P10688	1-phosphatidylinositol 4,5-bisphosphate phosphodiesterase delta-1	Plcd1	sp|P10688|PLCD1_RAT 1-phosphatidylinositol 4,5-bisphosphate phosphodiesterase delta-1 OS=Rattus norvegicus OX=10116 GN=Plcd1 PE=1 SV=1	24.7	85.961	697000	1116600	621980	988350	773290	1207300	1041300	951550	1001200	1653400	1472900	1221800	1424400	1279300	1411800	1195100
571	P10719	P10719	ATP synthase subunit beta, mitochondrial	Atp5b	sp|P10719|ATPB_RAT ATP synthase subunit beta, mitochondrial OS=Rattus norvegicus OX=10116 GN=Atp5f1b PE=1 SV=2	85.8	56.353	365780000	326240000	323550000	356500000	426630000	375900000	385880000	401160000	449270000	293900000	377440000	393330000	335790000	371880000	334670000	400740000
572	P10760	P10760	Adenosylhomocysteinase	Ahcy	sp|P10760|SAHH_RAT Adenosylhomocysteinase OS=Rattus norvegicus OX=10116 GN=Ahcy PE=1 SV=3	55.3	47.538	968120	1301100	669230	1045900	932730	1101800	1173400	712730	950770	1684300	1143800	1113600	1273600	1575300	1507800	1183700
573	P10817	P10817	Cytochrome c oxidase subunit 6A2, mitochondrial	Cox6a2	sp|P10817|CX6A2_RAT Cytochrome c oxidase subunit 6A2, mitochondrial (Fragment) OS=Rattus norvegicus OX=10116 GN=Cox6a2 PE=1 SV=3	41.5	10.487	1623800	0	0	2415700	2681300	3194300	2053600	840000	1602600	86734	651510	926980	2104600	110940	0	2037200
574	P10818	P10818	Cytochrome c oxidase subunit 6A1, mitochondrial	Cox6a1	sp|P10818|CX6A1_RAT Cytochrome c oxidase subunit 6A1, mitochondrial OS=Rattus norvegicus OX=10116 GN=Cox6a1 PE=1 SV=2	40.5	12.301	630170	0	0	861580	677310	1312100	409790	719680	515360	0	333720	1273400	1412500	0	0	1147500
575	P10824	P10824	Guanine nucleotide-binding protein G(i) subunit alpha-1	Gnai1	sp|P10824|GNAI1_RAT Guanine nucleotide-binding protein G(i) subunit alpha-1 OS=Rattus norvegicus OX=10116 GN=Gnai1 PE=1 SV=3	17.8	40.345	0	0	0	0	0	0	0	0	0	0	0	0	65164	51967	0	45878
576	P10860	P10860	Glutamate dehydrogenase 1, mitochondrial	Glud1	sp|P10860|DHE3_RAT Glutamate dehydrogenase 1, mitochondrial OS=Rattus norvegicus OX=10116 GN=Glud1 PE=1 SV=2	57.3	61.415	12291000	14814000	17377000	12345000	12583000	11851000	12081000	11669000	11503000	9339900	12112000	10308000	10368000	10223000	10940000	10520000
577	P10868	P10868	Guanidinoacetate N-methyltransferase	Gamt	sp|P10868|GAMT_RAT Guanidinoacetate N-methyltransferase OS=Rattus norvegicus OX=10116 GN=Gamt PE=1 SV=2	30.9	26.407	43450	60225	54977	80260	25558	0	56701	51375	81212	149480	181470	146730	229800	113740	197660	145200
578	P10888	P10888	Cytochrome c oxidase subunit 4 isoform 1, mitochondrial	Cox4i1	sp|P10888|COX41_RAT Cytochrome c oxidase subunit 4 isoform 1, mitochondrial OS=Rattus norvegicus OX=10116 GN=Cox4i1 PE=1 SV=1	71	19.514	28789000	32163000	32560000	28424000	29079000	30378000	28002000	24616000	36212000	20350000	37101000	37172000	33188000	32697000	32234000	33432000
579	P10959;Q64573	P10959	Carboxylesterase 1C	Ces1c	sp|P10959|EST1C_RAT Carboxylesterase 1C OS=Rattus norvegicus OX=10116 GN=Ces1c PE=1 SV=3	34.4	60.174	1394800	1820800	1829300	1326200	1387400	1610600	1935800	1765900	670770	502930	226330	198580	405490	332510	162660	287020
580	P10960	P10960	Sulfated glycoprotein 1	Psap	sp|P10960|SAP_RAT Prosaposin OS=Rattus norvegicus OX=10116 GN=Psap PE=1 SV=1	20.6	61.123	2546800	2513100	3527300	2511700	1753600	2315100	2547300	2288000	1803000	2493500	2681100	2422800	2694900	1889000	2564700	2375000
581	P11030	P11030	Acyl-CoA-binding protein;Triakontatetraneuropeptide;Octadecaneuropeptide	Dbi	sp|P11030|ACBP_RAT Acyl-CoA-binding protein OS=Rattus norvegicus OX=10116 GN=Dbi PE=1 SV=3	81.6	10.027	7437600	11101000	7681300	8685300	9331100	9001600	9268800	7078000	9459000	14144000	9997100	9170500	11014000	12840000	10365000	9892800
582	P11232	P11232	Thioredoxin	Txn	sp|P11232|THIO_RAT Thioredoxin OS=Rattus norvegicus OX=10116 GN=Txn PE=1 SV=2	54.3	11.673	2429900	2486600	2355800	2553800	2187700	2240000	2238400	2493100	2039500	2494000	1951100	2332600	2127800	2553800	2402100	2236200
583	P11240	P11240	Cytochrome c oxidase subunit 5A, mitochondrial	Cox5a	sp|P11240|COX5A_RAT Cytochrome c oxidase subunit 5A, mitochondrial OS=Rattus norvegicus OX=10116 GN=Cox5a PE=1 SV=1	59.6	16.129	27714000	24463000	27345000	28996000	32680000	30117000	27452000	30846000	28083000	24678000	34518000	42145000	29182000	27866000	29570000	33042000
584	P11250	P11250	60S ribosomal protein L34	Rpl34	sp|P11250|RL34_RAT 60S ribosomal protein L34 OS=Rattus norvegicus OX=10116 GN=Rpl34 PE=1 SV=3	21.4	13.507	310320	285480	466020	325460	426490	271480	80636	295620	247950	337100	0	380810	303520	367890	342600	315560
585	P11348	P11348	Dihydropteridine reductase	Qdpr	sp|P11348|DHPR_RAT Dihydropteridine reductase OS=Rattus norvegicus OX=10116 GN=Qdpr PE=1 SV=1	48.5	25.552	2322400	3221600	2382800	2601900	2528000	2479900	2868700	2362100	2431800	2749100	2109500	1925400	2184600	2542700	2130000	2143300
586	P11442	P11442	Clathrin heavy chain 1	Cltc	sp|P11442|CLH1_RAT Clathrin heavy chain 1 OS=Rattus norvegicus OX=10116 GN=Cltc PE=1 SV=3	59.9	191.6	17785000	18403000	9871100	17464000	16383000	17884000	17196000	15255000	19873000	19637000	20518000	19410000	18912000	19377000	20437000	18510000
587	P11497-2;P11497	P11497-2;P11497	Acetyl-CoA carboxylase 1;Biotin carboxylase	Acaca	sp|P11497-2|ACACA_RAT Isoform 2 of Acetyl-CoA carboxylase 1 OS=Rattus norvegicus OX=10116 GN=Acaca;sp|P11497|ACACA_RAT Acetyl-CoA carboxylase 1 OS=Rattus norvegicus OX=10116 GN=Acaca PE=1 SV=1	5.8	264.32	746930	729470	698990	711550	674960	640460	750700	551720	778040	1233100	734440	791600	836300	904780	872600	786480
588	P11505-1;P11505-4;P11505;P11505-6;P11505-5;P11505-2;Q64568-5;Q64568;Q64568-6;Q64568-8;P11506-7;Q64568-7;P11506-6;Q64568-4;P11506-8;Q64568-12;P11506-14;Q64568-11;Q64568-2;Q64568-9;Q64568-3;Q64568-10;P11506-4;P11506-10;P11506-3;P11506-12;P11506-5;P11506-11	P11505-1;P11505-4;P11505;P11505-6;P11505-5;P11505-2	Plasma membrane calcium-transporting ATPase 1	Atp2b1	sp|P11505-1|AT2B1_RAT Isoform D of Plasma membrane calcium-transporting ATPase 1 OS=Rattus norvegicus OX=10116 GN=Atp2b1;sp|P11505-4|AT2B1_RAT Isoform C of Plasma membrane calcium-transporting ATPase 1 OS=Rattus norvegicus OX=10116 GN=Atp2b1;sp|P11505|AT2B	17.7	138.72	577330	842110	1348800	578640	491940	550130	634790	502690	528440	782310	651660	559680	645150	714950	573110	513420
589	P11507-2;P11507	P11507-2;P11507	Sarcoplasmic/endoplasmic reticulum calcium ATPase 2	Atp2a2	sp|P11507-2|AT2A2_RAT Isoform 2 of Sarcoplasmic/endoplasmic reticulum calcium ATPase 2 OS=Rattus norvegicus OX=10116 GN=Atp2a2;sp|P11507|AT2A2_RAT Sarcoplasmic/endoplasmic reticulum calcium ATPase 2 OS=Rattus norvegicus OX=10116 GN=Atp2a2 PE=1 SV=1	60.1	109.68	156410000	167670000	178010000	155210000	155700000	149970000	152910000	152490000	185110000	163570000	163760000	152740000	149370000	165540000	151020000	153560000
590	P11517	P11517	Hemoglobin subunit beta-2		sp|P11517|HBB2_RAT Hemoglobin subunit beta-2 OS=Rattus norvegicus OX=10116 PE=1 SV=2	97.3	15.982	105050000	88914000	29423000	102950000	93494000	99103000	98953000	91352000	80858000	87466000	83651000	85926000	83216000	84898000	70359000	89512000
591	P11530;Q9EPA0	P11530	Dystrophin	Dmd	sp|P11530|DMD_RAT Dystrophin OS=Rattus norvegicus OX=10116 GN=Dmd PE=1 SV=2	58.1	425.82	26224000	31711000	27103000	28960000	27355000	29254000	28950000	27320000	27457000	35797000	32954000	29284000	29783000	30686000	30896000	27403000
592	P11598	P11598	Protein disulfide-isomerase A3	Pdia3	sp|P11598|PDIA3_RAT Protein disulfide-isomerase A3 OS=Rattus norvegicus OX=10116 GN=Pdia3 PE=1 SV=2	66.5	56.623	10241000	10968000	14485000	9976900	10037000	10248000	10749000	9504600	11549000	12917000	12807000	10689000	12065000	12931000	12722000	10561000
593	P11608	P11608	ATP synthase protein 8	Mt-atp8	sp|P11608|ATP8_RAT ATP synthase protein 8 OS=Rattus norvegicus OX=10116 GN=Mt-atp8 PE=1 SV=2	100	7.6298	7974000	9310700	30648000	5886700	15307000	5767200	4543200	5696100	9740200	8421300	5155300	7396600	5484600	9200100	5993600	6366400
594	P11654	P11654	Nuclear pore membrane glycoprotein 210	Nup210	sp|P11654|PO210_RAT Nuclear pore membrane glycoprotein 210 OS=Rattus norvegicus OX=10116 GN=Nup210 PE=1 SV=1	6.8	204.16	605730	848000	1619900	469270	483260	776140	694610	440570	647270	797180	891050	879990	1047800	670470	1146300	691870
595	P11661	P11661	NADH-ubiquinone oxidoreductase chain 5	Mtnd5	sp|P11661|NU5M_RAT NADH-ubiquinone oxidoreductase chain 5 OS=Rattus norvegicus OX=10116 GN=Mtnd5 PE=3 SV=3	14.6	68.617	2985900	3873300	2589900	3249800	2525700	3044900	3647500	2140900	4672700	5342000	3941800	4282100	4156600	5385500	4168700	4009900
596	P11662	P11662	NADH-ubiquinone oxidoreductase chain 2	Mtnd2	sp|P11662|NU2M_RAT NADH-ubiquinone oxidoreductase chain 2 OS=Rattus norvegicus OX=10116 GN=Mtnd2 PE=3 SV=3	9.5	38.652	113510	0	0	380220	867250	465120	193910	747010	0	0	0	308810	0	328560	0	131810
597	P11730-3;P11730-2;P11730	P11730-3;P11730-2;P11730	Calcium/calmodulin-dependent protein kinase type II subunit gamma	Camk2g	sp|P11730-3|KCC2G_RAT Isoform C of Calcium/calmodulin-dependent protein kinase type II subunit gamma OS=Rattus norvegicus OX=10116 GN=Camk2g;sp|P11730-2|KCC2G_RAT Isoform B of Calcium/calmodulin-dependent protein kinase type II subunit gamma OS=Rattus norv	30.1	55.96	198230	250310	245890	224030	241360	269960	279560	229840	226340	337260	256700	206780	240420	314570	316860	198430
598	P11762	P11762	Galectin-1	Lgals1	sp|P11762|LEG1_RAT Galectin-1 OS=Rattus norvegicus OX=10116 GN=Lgals1 PE=1 SV=2	89.6	14.857	11888000	13116000	7233800	11325000	7965500	10435000	11850000	11707000	10214000	14535000	13162000	10976000	12473000	12367000	13308000	11458000
599	P11884;Q63639	P11884	Aldehyde dehydrogenase, mitochondrial	Aldh2	sp|P11884|ALDH2_RAT Aldehyde dehydrogenase, mitochondrial OS=Rattus norvegicus OX=10116 GN=Aldh2 PE=1 SV=1	77.6	56.488	25220000	31125000	28509000	27622000	28984000	28073000	32344000	25464000	34187000	25415000	27936000	21746000	23050000	33745000	26028000	24579000
600	P11915;P11915-2	P11915;P11915-2	Non-specific lipid-transfer protein	Scp2	sp|P11915|SCP2_RAT Sterol carrier protein 2 OS=Rattus norvegicus OX=10116 GN=Scp2 PE=1 SV=3;sp|P11915-2|SCP2_RAT Isoform SCP2 of Sterol carrier protein 2 OS=Rattus norvegicus OX=10116 GN=Scp2	39.7	58.813	1841200	2240100	2277600	1879600	1482400	1710100	1847200	1744300	2577800	4316400	3035200	2713800	3361400	3723300	3915600	2910100
601	P11951;P11950	P11951	Cytochrome c oxidase subunit 6C-2	Cox6c2	sp|P11951|CX6C2_RAT Cytochrome c oxidase subunit 6C-2 OS=Rattus norvegicus OX=10116 GN=Cox6c2 PE=1 SV=3	64.5	8.4548	16267000	20042000	33527000	16202000	18033000	17728000	16968000	12881000	21223000	19973000	20727000	20263000	19151000	21836000	23232000	17593000
602	P11960	P11960	2-oxoisovalerate dehydrogenase subunit alpha, mitochondrial	Bckdha	sp|P11960|ODBA_RAT 2-oxoisovalerate dehydrogenase subunit alpha, mitochondrial (Fragment) OS=Rattus norvegicus OX=10116 GN=Bckdha PE=1 SV=1	68.3	50.164	4499600	5214200	5226500	4840600	5221600	5611900	5486100	4628100	5753500	4695600	4907700	4256500	4379700	3784800	4616300	4436300
603	P11980	P11980	Pyruvate kinase PKM	Pkm	sp|P11980|KPYM_RAT Pyruvate kinase PKM OS=Rattus norvegicus OX=10116 GN=Pkm PE=1 SV=3	77.2	57.817	43618000	53483000	68729000	42686000	44560000	41865000	45145000	46507000	49913000	44431000	47607000	41501000	41832000	50286000	40577000	44538000
604	P11980-2	P11980-2	Pyruvate kinase PKM	Pkm	sp|P11980-2|KPYM_RAT Isoform M2 of Pyruvate kinase PKM OS=Rattus norvegicus OX=10116 GN=Pkm	74.6	57.78	1266200	1219700	1197400	962350	791240	768510	1249300	1114700	866570	763600	653590	852370	744370	758050	651710	639200
605	P12001	P12001	60S ribosomal protein L18	Rpl18	sp|P12001|RL18_RAT 60S ribosomal protein L18 OS=Rattus norvegicus OX=10116 GN=Rpl18 PE=1 SV=2	37.8	21.658	2283900	3250500	4026200	2247900	2405100	2427300	2402600	1802300	2848300	3538200	2856700	2639200	2530100	3884800	2775900	2355000
606	P12007	P12007	Isovaleryl-CoA dehydrogenase, mitochondrial	Ivd	sp|P12007|IVD_RAT Isovaleryl-CoA dehydrogenase, mitochondrial OS=Rattus norvegicus OX=10116 GN=Ivd PE=1 SV=2	73.1	46.435	9107100	8841100	10214000	9378600	13537000	8679200	9593200	11722000	9857600	7005100	6028600	6499200	5297900	5356700	5632100	7087300
607	P12075	P12075	Cytochrome c oxidase subunit 5B, mitochondrial	Cox5b	sp|P12075|COX5B_RAT Cytochrome c oxidase subunit 5B, mitochondrial OS=Rattus norvegicus OX=10116 GN=Cox5b PE=1 SV=2	70.5	13.915	15337000	14900000	26228000	12301000	11911000	13941000	13740000	11384000	15655000	16184000	18121000	16569000	17375000	16771000	15974000	16575000
608	P12346;P12346-2;CON__Q29443;CON__Q0IIK2	P12346;P12346-2	Serotransferrin	Tf	sp|P12346|TRFE_RAT Serotransferrin OS=Rattus norvegicus OX=10116 GN=Tf PE=1 SV=3;sp|P12346-2|TRFE_RAT Isoform 2 of Serotransferrin OS=Rattus norvegicus OX=10116 GN=Tf	60.7	76.394	44729000	51468000	40295000	41627000	47115000	45947000	45595000	40268000	34829000	46669000	52310000	41784000	42478000	64799000	37904000	47501000
609	P12368	P12368	cAMP-dependent protein kinase type II-alpha regulatory subunit	Prkar2a	sp|P12368|KAP2_RAT cAMP-dependent protein kinase type II-alpha regulatory subunit OS=Rattus norvegicus OX=10116 GN=Prkar2a PE=1 SV=4	58.1	45.48	2233900	1907100	1424000	2874800	2535800	2906500	2300400	2622500	2246800	1903400	2111600	2662200	2142500	1570700	2015800	2504300
610	P12369	P12369	cAMP-dependent protein kinase type II-beta regulatory subunit	Prkar2b	sp|P12369|KAP3_RAT cAMP-dependent protein kinase type II-beta regulatory subunit OS=Rattus norvegicus OX=10116 GN=Prkar2b PE=1 SV=3	45.9	46.122	404870	421400	369400	342900	371050	336510	363500	299330	184470	483820	362410	321790	610990	385280	514680	276230
611	P12711;P41682	P12711	Alcohol dehydrogenase class-3	Adh5	sp|P12711|ADHX_RAT Alcohol dehydrogenase class-3 OS=Rattus norvegicus OX=10116 GN=Adh5 PE=1 SV=2	54.8	39.575	1427900	1966600	1474900	1540500	1527800	1550300	1733000	1647100	1570400	1732500	1618500	1203900	1636700	1528800	1759600	1357300
612	P12749	P12749	60S ribosomal protein L26	Rpl26	sp|P12749|RL26_RAT 60S ribosomal protein L26 OS=Rattus norvegicus OX=10116 GN=Rpl26 PE=1 SV=1	37.2	17.277	840840	839490	1305300	648190	692740	773880	689780	709770	636820	1004300	945410	803540	832800	777120	913300	815160
613	P12785	P12785	Fatty acid synthase;[Acyl-carrier-protein] S-acetyltransferase;[Acyl-carrier-protein] S-malonyltransferase;3-oxoacyl-[acyl-carrier-protein] synthase;3-oxoacyl-[acyl-carrier-protein] reductase;3-hydroxyacyl-[acyl-carrier-protein] dehydratase;Enoyl-[acyl-carrier-protein] reductase;Oleoyl-[acyl-carrier-protein] hydrolase	Fasn	sp|P12785|FAS_RAT Fatty acid synthase OS=Rattus norvegicus OX=10116 GN=Fasn PE=1 SV=3	5.8	272.65	1033500	962130	874090	726050	659280	752900	1183400	1217500	818430	958180	949290	620650	851490	617380	652130	729010
614	P12847	P12847	Myosin-3	Myh3	sp|P12847|MYH3_RAT Myosin-3 OS=Rattus norvegicus OX=10116 GN=Myh3 PE=3 SV=1	17.2	223.86	4159800	4500600	12577000	4427900	3518500	3747000	3198000	3603300	6868900	2779600	4967200	4365500	4409200	5619600	4033000	4327400
615	P12928-2;P12928	P12928-2;P12928	Pyruvate kinase PKLR	Pklr	sp|P12928-2|KPYR_RAT Isoform L-type of Pyruvate kinase PKLR OS=Rattus norvegicus OX=10116 GN=Pklr;sp|P12928|KPYR_RAT Pyruvate kinase PKLR OS=Rattus norvegicus OX=10116 GN=Pklr PE=1 SV=2	10.5	58.793	0	0	34008	0	0	0	0	0	0	32263	0	0	0	29694	0	0
616	P13084;P13084-2	P13084;P13084-2	Nucleophosmin	Npm1	sp|P13084|NPM_RAT Nucleophosmin OS=Rattus norvegicus OX=10116 GN=Npm1 PE=1 SV=1;sp|P13084-2|NPM_RAT Isoform B23.2 of Nucleophosmin OS=Rattus norvegicus OX=10116 GN=Npm1	44.5	32.56	3693000	2807700	3617500	2363600	2045800	2586900	2461800	2810600	3075000	5020300	3644100	3084100	3361700	4141200	3527300	2898900
617	P13086	P13086	Succinyl-CoA ligase [ADP/GDP-forming] subunit alpha, mitochondrial	Suclg1	sp|P13086|SUCA_RAT Succinate--CoA ligase [ADP/GDP-forming] subunit alpha, mitochondrial OS=Rattus norvegicus OX=10116 GN=Suclg1 PE=2 SV=2	57.5	36.148	11504000	15468000	9657900	13758000	14117000	16067000	14599000	11984000	14831000	16258000	16025000	14407000	15285000	16061000	14962000	12598000
618	P13195	P13195	5-aminolevulinate synthase, nonspecific, mitochondrial	Alas1	sp|P13195|HEM1_RAT 5-aminolevulinate synthase, nonspecific, mitochondrial OS=Rattus norvegicus OX=10116 GN=Alas1 PE=2 SV=2	14	71.02	206270	274690	492290	207530	195300	154010	160870	163320	163060	306100	239660	218790	247330	315490	196960	212980
619	P13221	P13221	Aspartate aminotransferase, cytoplasmic	Got1	sp|P13221|AATC_RAT Aspartate aminotransferase, cytoplasmic OS=Rattus norvegicus OX=10116 GN=Got1 PE=1 SV=3	77.2	46.428	11002000	12329000	18700000	10235000	14304000	12746000	14703000	8961000	18539000	10886000	8988900	12636000	9823300	16531000	10651000	13060000
620	P13233	P13233	2,3-cyclic-nucleotide 3-phosphodiesterase	Cnp	sp|P13233|CN37_RAT 2,3-cyclic-nucleotide 3-phosphodiesterase OS=Rattus norvegicus OX=10116 GN=Cnp PE=1 SV=2	18.8	47.268	26236	50396	0	65492	75730	29137	72107	69116	46277	131310	84718	81399	72954	82843	92214	98636
621	P13264-2;P13264	P13264-2;P13264	Glutaminase kidney isoform, mitochondrial;Glutaminase kidney isoform 68 kDa chain;Glutaminase kidney isoform 65 kDa chain	Gls	sp|P13264-2|GLSK_RAT Isoform 2 of Glutaminase kidney isoform, mitochondrial OS=Rattus norvegicus OX=10116 GN=Gls;sp|P13264|GLSK_RAT Glutaminase kidney isoform, mitochondrial OS=Rattus norvegicus OX=10116 GN=Gls PE=1 SV=2	24.2	65.996	249410	267630	618470	239200	258500	245580	234030	287350	252980	200100	210690	206950	237250	188160	230760	271900
622	P13383	P13383	Nucleolin	Ncl	sp|P13383|NUCL_RAT Nucleolin OS=Rattus norvegicus OX=10116 GN=Ncl PE=1 SV=3	33.4	77.146	3662800	3249600	3724000	2714000	2968200	2868700	2862400	3290200	3447700	3720900	3938800	4241600	3737400	3621900	3845800	3786500
623	P13413	P13413	Troponin I, slow skeletal muscle	Tnni1	sp|P13413|TNNI1_RAT Troponin I, slow skeletal muscle OS=Rattus norvegicus OX=10116 GN=Tnni1 PE=1 SV=2	52.9	21.724	713960	585880	1498000	563050	435760	471240	708580	587710	887490	4880600	3131200	2543600	3810500	2143300	4293000	2173600
624	P13437	P13437	3-ketoacyl-CoA thiolase, mitochondrial	Acaa2	sp|P13437|THIM_RAT 3-ketoacyl-CoA thiolase, mitochondrial OS=Rattus norvegicus OX=10116 GN=Acaa2 PE=1 SV=1	88.9	41.87	51284000	58655000	50291000	52658000	64117000	55622000	52764000	56565000	77045000	66544000	71420000	76309000	66924000	76229000	60368000	72837000
625	P13471	P13471	40S ribosomal protein S14	Rps14	sp|P13471|RS14_RAT 40S ribosomal protein S14 OS=Rattus norvegicus OX=10116 GN=Rps14 PE=2 SV=3	68.2	16.259	1120900	1283200	1804600	1004100	896180	1053600	1067200	936760	1132300	1605100	1185200	1150900	1259000	1338300	1194600	1175800
626	P13596	P13596	Neural cell adhesion molecule 1	Ncam1	sp|P13596|NCAM1_RAT Neural cell adhesion molecule 1 OS=Rattus norvegicus OX=10116 GN=Ncam1 PE=1 SV=1	11.7	94.657	140060	304690	769050	109120	96236	87174	307710	110400	112710	390200	319040	199100	256250	139660	175890	117510
627	P13601	P13601	Aldehyde dehydrogenase, cytosolic 1	Aldh1a7	sp|P13601|AL1A7_RAT Aldehyde dehydrogenase, cytosolic 1 OS=Rattus norvegicus OX=10116 GN=Aldh1a7 PE=1 SV=2	19.2	54.559	0	0	0	0	0	0	0	0	0	0	0	0	0	0	0	7435.6
628	P13635	P13635	Ceruloplasmin	Cp	sp|P13635|CERU_RAT Ceruloplasmin OS=Rattus norvegicus OX=10116 GN=Cp PE=1 SV=3	39.2	120.84	2807000	3117800	2436500	2462500	2593300	3071400	3132700	2755200	3017600	2741100	2352800	1995800	2441500	2714900	2077500	2199500
629	P13668	P13668	Stathmin	Stmn1	sp|P13668|STMN1_RAT Stathmin OS=Rattus norvegicus OX=10116 GN=Stmn1 PE=1 SV=2	24.8	17.288	300500	310110	417280	205970	291650	267900	238640	252030	297280	142640	159200	115590	156890	169420	115310	113030
630	P13676	P13676	Acylamino-acid-releasing enzyme	Apeh	sp|P13676|ACPH_RAT Acylamino-acid-releasing enzyme OS=Rattus norvegicus OX=10116 GN=Apeh PE=1 SV=1	8.2	81.383	0	56202	158280	34576	30310	40655	63670	0	90475	102460	33535	83527	51802	105390	55638	135880
631	P13697	P13697	NADP-dependent malic enzyme	Me1	sp|P13697|MAOX_RAT NADP-dependent malic enzyme OS=Rattus norvegicus OX=10116 GN=Me1 PE=1 SV=2	16.6	64.002	364080	267200	147430	379570	376710	342430	379320	596830	236050	283670	452240	383580	482290	166520	373060	488420
632	P13803	P13803	Electron transfer flavoprotein subunit alpha, mitochondrial	Etfa	sp|P13803|ETFA_RAT Electron transfer flavoprotein subunit alpha, mitochondrial OS=Rattus norvegicus OX=10116 GN=Etfa PE=1 SV=4	86.8	34.951	50620000	60346000	51954000	53028000	58693000	56850000	55730000	53007000	52893000	44983000	51204000	47299000	47098000	50037000	41318000	50212000
633	P13832	P13832	Myosin regulatory light chain RLC-A	Rlc-a	sp|P13832|MRLCA_RAT Myosin regulatory light chain RLC-A OS=Rattus norvegicus OX=10116 GN=Rlc-a PE=2 SV=2	51.7	19.895	2075100	1556600	1789300	2202000	2064000	2113400	1952700	2252500	2373100	1236100	2552100	2608800	2299600	1768700	1987700	2079200
634	P13852	P13852	Major prion protein	Prnp	sp|P13852|PRIO_RAT Major prion protein OS=Rattus norvegicus OX=10116 GN=Prnp PE=1 SV=2	4.7	27.804	0	0	0	0	0	0	0	0	0	0	0	0	0	0	0	54822
635	P13941;CON__P04258	P13941	Collagen alpha-1(III) chain	Col3a1	sp|P13941|CO3A1_RAT Collagen alpha-1(III) chain OS=Rattus norvegicus OX=10116 GN=Col3a1 PE=2 SV=3	7.6	138.93	224790	206800	608400	173650	188480	153340	209390	206250	209090	199140	162500	137070	184680	196840	174020	177030
636	P14046	P14046	Alpha-1-inhibitor 3	A1i3	sp|P14046|A1I3_RAT Alpha-1-inhibitor 3 OS=Rattus norvegicus OX=10116 GN=A1i3 PE=1 SV=1	49.4	163.77	3966500	7281000	8309700	4559400	6762300	5321300	6690600	6214100	7241400	1553200	1894200	863750	1326300	2634200	741190	1555000
637	P14056	P14056	Serine/threonine-protein kinase A-Raf	Araf	sp|P14056|ARAF_RAT Serine/threonine-protein kinase A-Raf OS=Rattus norvegicus OX=10116 GN=Araf PE=1 SV=1	10.8	67.551	0	0	0	95954	115030	88980	0	0	87714	120090	51788	108360	152330	91765	33327	0
638	P14173	P14173	Aromatic-L-amino-acid decarboxylase	Ddc	sp|P14173|DDC_RAT Aromatic-L-amino-acid decarboxylase OS=Rattus norvegicus OX=10116 GN=Ddc PE=1 SV=1	32.3	54.053	325300	395490	633830	364080	285690	380240	454040	242460	432570	672830	450210	436630	640590	567530	700840	426370
639	P14270-8;P14270-1;P14270-6;P14270-9;P14270-4;P14270	P14270-8;P14270-1;P14270-6;P14270-9;P14270-4;P14270	cAMP-specific 3,5-cyclic phosphodiesterase 4D	Pde4d	sp|P14270-8|PDE4D_RAT Isoform 5 of cAMP-specific 3,5-cyclic phosphodiesterase 4D OS=Rattus norvegicus OX=10116 GN=Pde4d;sp|P14270-1|PDE4D_RAT Isoform 33 of cAMP-specific 3,5-cyclic phosphodiesterase 4D OS=Rattus norvegicus OX=10116 GN=Pde4d;sp|P14270-6	8.7	84.334	187730	251650	617930	189280	0	198630	338570	0	81032	138070	218680	156840	0	495490	221780	0
640	P14272	P14272	Plasma kallikrein;Plasma kallikrein heavy chain;Plasma kallikrein light chain	Klkb1	sp|P14272|KLKB1_RAT Plasma kallikrein OS=Rattus norvegicus OX=10116 GN=Klkb1 PE=1 SV=1	3.4	71.273	0	0	0	0	0	0	0	0	0	0	0	0	0	0	0	19436
641	P14408-2;P14408	P14408-2;P14408	Fumarate hydratase, mitochondrial	Fh	sp|P14408-2|FUMH_RAT Isoform Cytoplasmic of Fumarate hydratase, mitochondrial OS=Rattus norvegicus OX=10116 GN=Fh;sp|P14408|FUMH_RAT Fumarate hydratase, mitochondrial OS=Rattus norvegicus OX=10116 GN=Fh PE=1 SV=2	78.6	50.17	30217000	28211000	17465000	30029000	31844000	30912000	30591000	29697000	31551000	25515000	34965000	35437000	30762000	30147000	30722000	34451000
642	P14480;P14480-2	P14480;P14480-2	Fibrinogen beta chain;Fibrinopeptide B;Fibrinogen beta chain	Fgb	sp|P14480|FIBB_RAT Fibrinogen beta chain OS=Rattus norvegicus OX=10116 GN=Fgb PE=1 SV=4;sp|P14480-2|FIBB_RAT Isoform 2 of Fibrinogen beta chain OS=Rattus norvegicus OX=10116 GN=Fgb	73.5	54.235	2716600	3194800	1635800	2673700	3329600	4069500	3198200	3644000	3497200	2055100	2105700	2130200	1999000	2348200	1991500	2010400
643	P14562	P14562	Lysosome-associated membrane glycoprotein 1	Lamp1	sp|P14562|LAMP1_RAT Lysosome-associated membrane glycoprotein 1 OS=Rattus norvegicus OX=10116 GN=Lamp1 PE=1 SV=1	10.8	43.969	345840	644820	173810	440740	315210	377920	390390	366000	468910	625730	322070	337320	376770	540610	403980	339220
644	P14604	P14604	Enoyl-CoA hydratase, mitochondrial	Echs1	sp|P14604|ECHM_RAT Enoyl-CoA hydratase, mitochondrial OS=Rattus norvegicus OX=10116 GN=Echs1 PE=1 SV=1	63.1	31.516	19732000	19719000	18674000	21977000	24139000	24138000	21075000	18147000	23226000	14246000	17099000	15452000	15228000	13740000	15425000	16152000
645	P14630	P14630	Apolipoprotein M	Apom	sp|P14630|APOM_RAT Apolipoprotein M OS=Rattus norvegicus OX=10116 GN=Apom PE=1 SV=2	7.9	21.512	154810	282420	177460	64200	0	0	0	152120	0	410930	0	174030	0	0	0	54352
646	P14646-4;P14646-1;P14646-5;P14646	P14646-4;P14646-1;P14646-5;P14646	cAMP-specific 3,5-cyclic phosphodiesterase 4B	Pde4b	sp|P14646-4|PDE4B_RAT Isoform 4 of cAMP-specific 3,5-cyclic phosphodiesterase 4B OS=Rattus norvegicus OX=10116 GN=Pde4b;sp|P14646-1|PDE4B_RAT Isoform 3 of cAMP-specific 3,5-cyclic phosphodiesterase 4B OS=Rattus norvegicus OX=10116 GN=Pde4b;sp|P14646-5|	3.9	75.084	0	0	0	0	0	0	0	0	0	0	0	0	0	0	0	17881
647	P14668	P14668	Annexin A5	Anxa5	sp|P14668|ANXA5_RAT Annexin A5 OS=Rattus norvegicus OX=10116 GN=Anxa5 PE=1 SV=3	87.1	35.744	18991000	18612000	12406000	17821000	18481000	17097000	18246000	18963000	13135000	17429000	19748000	17828000	18070000	16058000	17962000	16546000
648	P14669	P14669	Annexin A3	Anxa3	sp|P14669|ANXA3_RAT Annexin A3 OS=Rattus norvegicus OX=10116 GN=Anxa3 PE=1 SV=4	79.3	36.363	4129800	4370700	4936400	4068200	4219300	3893300	3720600	3594700	3805700	3518200	3598000	3058700	3576500	3452900	3594200	3171400
649	P14841	P14841	Cystatin-C	Cst3	sp|P14841|CYTC_RAT Cystatin-C OS=Rattus norvegicus OX=10116 GN=Cst3 PE=1 SV=2	32.9	15.437	278440	343270	720640	295890	0	284310	256430	258570	237350	417590	313450	0	0	317640	319800	248470
650	P14882	P14882	Propionyl-CoA carboxylase alpha chain, mitochondrial	Pcca	sp|P14882|PCCA_RAT Propionyl-CoA carboxylase alpha chain, mitochondrial OS=Rattus norvegicus OX=10116 GN=Pcca PE=1 SV=3	57.1	81.622	8351300	10162000	8139100	8761900	9611000	8792500	9289500	8787700	11003000	8941700	8337100	7082700	7341700	9275100	8353600	8123100
651	P14925-3;P14925-4;P14925-5;P14925-2;P14925;P14925-6;P14925-7	P14925-3;P14925-4;P14925-5;P14925-2;P14925;P14925-6	Peptidyl-glycine alpha-amidating monooxygenase;Peptidylglycine alpha-hydroxylating monooxygenase;Peptidyl-alpha-hydroxyglycine alpha-amidating lyase	Pam	sp|P14925-3|AMD_RAT Isoform PAM-3 of Peptidylglycine alpha-amidating monooxygenase OS=Rattus norvegicus OX=10116 GN=Pam;sp|P14925-4|AMD_RAT Isoform PAM-3A of Peptidylglycine alpha-amidating monooxygenase OS=Rattus norvegicus OX=10116 GN=Pam;sp|P14925-5|AMD	9.6	87.252	180310	173300	213200	196640	213110	209800	279800	188010	152380	241290	233410	84253	232880	212910	322470	167080
652	P14942	P14942	Glutathione S-transferase alpha-4	Gsta4	sp|P14942|GSTA4_RAT Glutathione S-transferase alpha-4 OS=Rattus norvegicus OX=10116 GN=Gsta4 PE=1 SV=2	47.3	25.51	603470	763140	404330	660450	771460	652430	678530	1484800	455590	642420	603880	728390	488600	888700	598350	634510
653	P15178	P15178	Aspartate--tRNA ligase, cytoplasmic	Dars	sp|P15178|SYDC_RAT Aspartate--tRNA ligase, cytoplasmic OS=Rattus norvegicus OX=10116 GN=Dars1 PE=1 SV=1	48.5	57.126	2033700	2011300	1967100	1771400	1798400	1993100	1982800	1437300	1916100	1856600	1772600	1603500	1771000	1930900	1900800	1709700
654	P15205	P15205	Microtubule-associated protein 1B;MAP1B heavy chain;MAP1 light chain LC1	Map1b	sp|P15205|MAP1B_RAT Microtubule-associated protein 1B OS=Rattus norvegicus OX=10116 GN=Map1b PE=1 SV=3	17.1	269.64	1031000	1267200	2581400	881520	809180	973630	1237000	1061600	683620	1088400	916440	686450	1057900	819990	871880	619020
655	P15304-2;P15304	P15304-2;P15304	Hormone-sensitive lipase	Lipe	sp|P15304-2|LIPS_RAT Isoform 2 of Hormone-sensitive lipase OS=Rattus norvegicus OX=10116 GN=Lipe;sp|P15304|LIPS_RAT Hormone-sensitive lipase OS=Rattus norvegicus OX=10116 GN=Lipe PE=1 SV=3	32.2	84.169	196510	253060	256840	212800	148620	191740	347360	146290	254960	667190	470860	505280	716610	629570	620460	463060
656	P15337;P15337-1	P15337;P15337-1	Cyclic AMP-responsive element-binding protein 1	Creb1	sp|P15337|CREB1_RAT Cyclic AMP-responsive element-binding protein 1 OS=Rattus norvegicus OX=10116 GN=Creb1 PE=1 SV=2;sp|P15337-1|CREB1_RAT Isoform 2 of Cyclic AMP-responsive element-binding protein 1 OS=Rattus norvegicus OX=10116 GN=Creb1	13.5	35.081	101780	0	203550	64756	100630	0	88172	99643	86722	55664	0	102690	0	0	0	0
657	P15389-2;P15389	P15389-2;P15389	Sodium channel protein type 5 subunit alpha	Scn5a	sp|P15389-2|SCN5A_RAT Isoform 2 of Sodium channel protein type 5 subunit alpha OS=Rattus norvegicus OX=10116 GN=Scn5a;sp|P15389|SCN5A_RAT Sodium channel protein type 5 subunit alpha OS=Rattus norvegicus OX=10116 GN=Scn5a PE=1 SV=1	2.1	221.7	0	56752	45121	46771	0	57242	0	0	79399	97206	58882	34991	48515	173000	49694	41987
658	P15429	P15429	Beta-enolase	Eno3	sp|P15429|ENOB_RAT Beta-enolase OS=Rattus norvegicus OX=10116 GN=Eno3 PE=1 SV=3	66.6	47.013	10505000	13897000	8142100	10720000	10427000	9270000	14214000	11080000	10467000	12092000	11835000	9381400	7963300	15139000	9337800	10426000
659	P15431;P63079;P63138	P15431;P63079;P63138	Gamma-aminobutyric acid receptor subunit beta-1;Gamma-aminobutyric acid receptor subunit beta-3;Gamma-aminobutyric acid receptor subunit beta-2	Gabrb1;Gabrb3;Gabrb2	sp|P15431|GBRB1_RAT Gamma-aminobutyric acid receptor subunit beta-1 OS=Rattus norvegicus OX=10116 GN=Gabrb1 PE=1 SV=1;sp|P63079|GBRB3_RAT Gamma-aminobutyric acid receptor subunit beta-3 OS=Rattus norvegicus OX=10116 GN=Gabrb3 PE=1 SV=1;sp|P63138|GBRB2_RAT	6.1	54.072	0	0	0	0	0	0	0	0	0	0	0	0	0	0	0	419530
660	P15650	P15650	Long-chain specific acyl-CoA dehydrogenase, mitochondrial	Acadl	sp|P15650|ACADL_RAT Long-chain specific acyl-CoA dehydrogenase, mitochondrial OS=Rattus norvegicus OX=10116 GN=Acadl PE=1 SV=1	60.9	47.872	76350000	76969000	66866000	83750000	99486000	94051000	91041000	77327000	84303000	58146000	84629000	81172000	76254000	67489000	66958000	79658000
661	P15651	P15651	Short-chain specific acyl-CoA dehydrogenase, mitochondrial	Acads	sp|P15651|ACADS_RAT Short-chain specific acyl-CoA dehydrogenase, mitochondrial OS=Rattus norvegicus OX=10116 GN=Acads PE=1 SV=2	66.7	44.765	16593000	21101000	13778000	17102000	19331000	18176000	21198000	17484000	20692000	19726000	22118000	21371000	20204000	20239000	20295000	21177000
662	P15684	P15684	Aminopeptidase N	Anpep	sp|P15684|AMPN_RAT Aminopeptidase N OS=Rattus norvegicus OX=10116 GN=Anpep PE=1 SV=2	23.1	109.45	152560	420450	619820	223420	164060	260910	229730	460180	275570	422280	347350	362240	409370	355520	433470	218860
663	P15791-2;P15791-3;P15791-4;P15791;P15791-5;P15791-7;P15791-6	P15791-2;P15791-3;P15791-4;P15791;P15791-5;P15791-7;P15791-6	Calcium/calmodulin-dependent protein kinase type II subunit delta	Camk2d	sp|P15791-2|KCC2D_RAT Isoform Delta 2 of Calcium/calmodulin-dependent protein kinase type II subunit delta OS=Rattus norvegicus OX=10116 GN=Camk2d;sp|P15791-3|KCC2D_RAT Isoform Delta 3 of Calcium/calmodulin-dependent protein kinase type II subunit delta OS	37.3	56.446	2153500	2527800	2947800	2112000	2190700	2193700	1799800	1734100	1711100	2766600	2246900	2161400	2194500	2211400	2315700	1827000
664	P15800	P15800	Laminin subunit beta-2	Lamb2	sp|P15800|LAMB2_RAT Laminin subunit beta-2 OS=Rattus norvegicus OX=10116 GN=Lamb2 PE=1 SV=1	38.3	196.47	3301900	4200700	5831300	3124900	3249000	3237000	3577700	3246500	3996500	5682300	4565000	3983800	3804500	4340000	3779800	3632400
665	P15865;P06349	P15865	Histone H1.4	Hist1h1e	sp|P15865|H14_RAT Histone H1.4 OS=Rattus norvegicus OX=10116 GN=H1-4 PE=1 SV=3	39.7	21.987	17681000	19799000	32482000	17287000	17557000	16110000	18423000	13846000	20397000	27620000	24171000	23071000	27180000	29195000	26193000	23379000
666	P15999	P15999	ATP synthase subunit alpha, mitochondrial	Atp5a1	sp|P15999|ATPA_RAT ATP synthase subunit alpha, mitochondrial OS=Rattus norvegicus OX=10116 GN=Atp5f1a PE=1 SV=2	73.6	59.753	219210000	206950000	289820000	213280000	266060000	224730000	225170000	221000000	269450000	148920000	218940000	226100000	194610000	230130000	210930000	217470000
667	P16036	P16036	Phosphate carrier protein, mitochondrial	Slc25a3	sp|P16036|MPCP_RAT Phosphate carrier protein, mitochondrial OS=Rattus norvegicus OX=10116 GN=Slc25a3 PE=1 SV=1	67.1	39.445	37989000	41839000	42553000	34832000	31551000	35503000	34505000	30311000	43636000	38295000	33700000	34900000	31820000	41949000	35064000	29827000
668	P16086	P16086	Spectrin alpha chain, non-erythrocytic 1	Sptan1	sp|P16086|SPTN1_RAT Spectrin alpha chain, non-erythrocytic 1 OS=Rattus norvegicus OX=10116 GN=Sptan1 PE=1 SV=2	77.1	284.63	39765000	45647000	44464000	39038000	39927000	36839000	40954000	38219000	47199000	57589000	49627000	48021000	48726000	49947000	49380000	42358000
669	P16290	P16290	Phosphoglycerate mutase 2	Pgam2	sp|P16290|PGAM2_RAT Phosphoglycerate mutase 2 OS=Rattus norvegicus OX=10116 GN=Pgam2 PE=1 SV=2	77.1	28.755	11127000	17446000	16241000	12708000	14941000	14225000	14938000	12259000	18541000	19365000	16860000	14297000	14169000	22069000	15718000	16321000
670	P16296	P16296	Coagulation factor IX;Coagulation factor IXa light chain;Coagulation factor IXa heavy chain	F9	sp|P16296|FA9_RAT Coagulation factor IX OS=Rattus norvegicus OX=10116 GN=F9 PE=2 SV=2	5.8	51.808	23022	27023	53731	26759	21493	28700	23670	0	18831	0	0	0	0	0	0	0
671	P16391	P16391	RT1 class I histocompatibility antigen, AA alpha chain		sp|P16391|HA12_RAT RT1 class I histocompatibility antigen, AA alpha chain OS=Rattus norvegicus OX=10116 PE=1 SV=2	5.7	41.83	0	0	0	53659	0	53818	0	7266.7	0	0	47501	0	0	0	0	0
672	P16409	P16409	Myosin light chain 3	Myl3	sp|P16409|MYL3_RAT Myosin light chain 3 OS=Rattus norvegicus OX=10116 GN=Myl3 PE=1 SV=2	88	22.156	222790000	227270000	220730000	219400000	239780000	228960000	228870000	237870000	264620000	204870000	248670000	237460000	221320000	233970000	225780000	234270000
673	P16446	P16446	Phosphatidylinositol transfer protein alpha isoform	Pitpna	sp|P16446|PIPNA_RAT Phosphatidylinositol transfer protein alpha isoform OS=Rattus norvegicus OX=10116 GN=Pitpna PE=1 SV=2	54.6	31.907	848100	764050	1412200	823830	780310	762340	928880	929050	860610	1047200	652750	765120	842340	1014200	742900	760850
674	P16617	P16617	Phosphoglycerate kinase 1	Pgk1	sp|P16617|PGK1_RAT Phosphoglycerate kinase 1 OS=Rattus norvegicus OX=10116 GN=Pgk1 PE=1 SV=2	93	44.538	55745000	65477000	66438000	54241000	53991000	54296000	56805000	53060000	52548000	47628000	51513000	42463000	47568000	58665000	45004000	48462000
675	P16636	P16636	Protein-lysine 6-oxidase	Lox	sp|P16636|LYOX_RAT Protein-lysine 6-oxidase OS=Rattus norvegicus OX=10116 GN=Lox PE=1 SV=2	9.2	46.558	0	0	359430	0	0	0	0	0	0	377310	0	0	371250	0	0	0
676	P16638-2;P16638	P16638-2;P16638	ATP-citrate synthase	Acly	sp|P16638-2|ACLY_RAT Isoform 2 of ATP-citrate synthase OS=Rattus norvegicus OX=10116 GN=Acly;sp|P16638|ACLY_RAT ATP-citrate synthase OS=Rattus norvegicus OX=10116 GN=Acly PE=1 SV=1	20.6	119.7	573480	866690	1139000	688000	555110	711680	713530	546990	802720	1075700	779280	631400	822470	839820	781860	698110
677	P16970	P16970	ATP-binding cassette sub-family D member 3	Abcd3	sp|P16970|ABCD3_RAT ATP-binding cassette sub-family D member 3 OS=Rattus norvegicus OX=10116 GN=Abcd3 PE=1 SV=3	11.7	75.315	261180	228700	233850	274590	259740	280430	275900	256630	272970	350060	368750	393970	400120	293930	425480	283350
678	P16975	P16975	SPARC	Sparc	sp|P16975|SPRC_RAT SPARC OS=Rattus norvegicus OX=10116 GN=Sparc PE=1 SV=4	41.5	34.296	966910	897430	1146600	796200	672100	772010	923510	977880	683310	1301300	818950	644160	911350	703370	987160	714650
679	P17046	P17046	Lysosome-associated membrane glycoprotein 2	Lamp2	sp|P17046|LAMP2_RAT Lysosome-associated membrane glycoprotein 2 OS=Rattus norvegicus OX=10116 GN=Lamp2 PE=1 SV=3	11.4	45.155	157080	95092	0	214340	212480	190270	191960	352700	269850	0	87363	284990	148000	178400	114230	262610
680	P17074	P17074	40S ribosomal protein S19	Rps19	sp|P17074|RS19_RAT 40S ribosomal protein S19 OS=Rattus norvegicus OX=10116 GN=Rps19 PE=2 SV=3	54.5	16.085	2554700	1890400	892230	2067800	2118700	2360800	2097300	1816700	2471700	2358900	2510800	2463000	2185700	2386000	2353100	2369600
681	P17077	P17077	60S ribosomal protein L9	Rpl9	sp|P17077|RL9_RAT 60S ribosomal protein L9 OS=Rattus norvegicus OX=10116 GN=Rpl9 PE=1 SV=1	75.5	21.893	2601800	2035400	3343300	2211000	2278300	2253600	1903200	2301700	2511200	2348100	2342200	2425600	1996400	1727400	2346400	2419000
682	P17078	P17078	60S ribosomal protein L35	Rpl35	sp|P17078|RL35_RAT 60S ribosomal protein L35 OS=Rattus norvegicus OX=10116 GN=Rpl35 PE=1 SV=3	30.1	14.552	726910	765590	415240	663690	815880	688390	704420	686710	778770	830360	803710	752070	742790	896060	838800	854170
683	P17136;P63164	P17136;P63164	Small nuclear ribonucleoprotein-associated protein B;Small nuclear ribonucleoprotein-associated protein N	Snrpb;Snrpn	sp|P17136|RSMB_RAT Small nuclear ribonucleoprotein-associated protein B OS=Rattus norvegicus OX=10116 GN=Snrpb PE=2 SV=2;sp|P63164|RSMN_RAT Small nuclear ribonucleoprotein-associated protein N OS=Rattus norvegicus OX=10116 GN=Snrpn PE=2 SV=1	10	23.656	68118	0	0	83465	53391	65062	70904	41879	110200	61604	63224	77982	91458	68064	82346	61871
684	P17164	P17164	Tissue alpha-L-fucosidase	Fuca1	sp|P17164|FUCO_RAT Tissue alpha-L-fucosidase OS=Rattus norvegicus OX=10116 GN=Fuca1 PE=1 SV=1	6.1	53.486	0	0	0	0	45183	0	0	0	0	0	0	0	49760	0	0	62791
685	P17178	P17178	Sterol 26-hydroxylase, mitochondrial	Cyp27a1	sp|P17178|CP27A_RAT Sterol 26-hydroxylase, mitochondrial OS=Rattus norvegicus OX=10116 GN=Cyp27a1 PE=1 SV=1	20.3	60.732	321030	404220	182800	282380	297200	289730	338790	267450	329110	577840	285180	288050	318850	313140	89425	214050
686	P17209	P17209	Myosin light chain 4	Myl4	sp|P17209|MYL4_RAT Myosin light chain 4 OS=Rattus norvegicus OX=10116 GN=Myl4 PE=2 SV=2	88.6	21.282	282510	288880	430030	79407	109030	190980	1727900	951050	161290	902310	4076700	126880	4431200	725850	1194900	286910
687	P17220	P17220	Proteasome subunit alpha type-2	Psma2	sp|P17220|PSA2_RAT Proteasome subunit alpha type-2 OS=Rattus norvegicus OX=10116 GN=Psma2 PE=1 SV=3	67.5	25.926	1130200	662720	1605300	935650	867400	1004500	1026400	671420	1981200	1131900	735740	1274200	965950	1602500	1618200	1260300
688	P17431	P17431	Zinc finger protein 36, C3H1 type-like 1	Zfp36l1	sp|P17431|TISB_RAT mRNA decay activator protein ZFP36L1 OS=Rattus norvegicus OX=10116 GN=Zfp36l1 PE=1 SV=1	5.3	36.398	0	0	0	0	0	0	0	0	0	0	0	0	6113.3	0	0	0
689	P17475	P17475	Alpha-1-antiproteinase	Serpina1	sp|P17475|A1AT_RAT Alpha-1-antiproteinase OS=Rattus norvegicus OX=10116 GN=Serpina1 PE=1 SV=2	59.4	46.135	13005000	17633000	12489000	11709000	11208000	13046000	12072000	12455000	8971300	10278000	7627500	8429300	7654000	14399000	7524500	9655500
690	P17702	P17702	60S ribosomal protein L28	Rpl28	sp|P17702|RL28_RAT 60S ribosomal protein L28 OS=Rattus norvegicus OX=10116 GN=Rpl28 PE=1 SV=4	28.5	15.848	238660	184960	245040	261970	216470	234310	173560	267220	281200	246190	232490	232070	262020	197660	265880	252340
691	P17764	P17764	Acetyl-CoA acetyltransferase, mitochondrial	Acat1	sp|P17764|THIL_RAT Acetyl-CoA acetyltransferase, mitochondrial OS=Rattus norvegicus OX=10116 GN=Acat1 PE=1 SV=1	79.7	44.695	47848000	56293000	51815000	46404000	48660000	48385000	52124000	45107000	59825000	55372000	53699000	55019000	52105000	59398000	52130000	56532000
692	P17955	P17955	Nuclear pore glycoprotein p62	Nup62	sp|P17955|NUP62_RAT Nuclear pore glycoprotein p62 OS=Rattus norvegicus OX=10116 GN=Nup62 PE=1 SV=1	6.7	53.396	151810	0	642050	0	0	0	0	0	0	887880	0	0	0	0	0	281620
693	P17988	P17988	Sulfotransferase 1A1	Sult1a1	sp|P17988|ST1A1_RAT Sulfotransferase 1A1 OS=Rattus norvegicus OX=10116 GN=Sult1a1 PE=1 SV=1	18.6	33.906	0	0	0	46761	0	53595	39022	0	0	0	63131	150610	50845	0	70443	74665
694	P18163	P18163	Long-chain-fatty-acid--CoA ligase 1	Acsl1	sp|P18163|ACSL1_RAT Long-chain-fatty-acid--CoA ligase 1 OS=Rattus norvegicus OX=10116 GN=Acsl1 PE=1 SV=1	74.5	78.178	57656000	60943000	60893000	57686000	59484000	54947000	59520000	56206000	61646000	70178000	67953000	67702000	61739000	66874000	65048000	65577000
695	P18265	P18265	Glycogen synthase kinase-3 alpha	Gsk3a	sp|P18265|GSK3A_RAT Glycogen synthase kinase-3 alpha OS=Rattus norvegicus OX=10116 GN=Gsk3a PE=1 SV=1	25.3	51.026	128710	134380	211440	152310	126360	150080	136870	120880	148150	179600	118960	134320	146760	112620	156840	128340
696	P18266	P18266	Glycogen synthase kinase-3 beta	Gsk3b	sp|P18266|GSK3B_RAT Glycogen synthase kinase-3 beta OS=Rattus norvegicus OX=10116 GN=Gsk3b PE=1 SV=1	43.6	46.742	1022700	1017200	1231900	1019500	901070	936640	1108000	978800	1047400	1217700	1583500	1168900	1307300	1392300	1339800	1188000
697	P18292;CON__P00735	P18292	Prothrombin;Activation peptide fragment 1;Activation peptide fragment 2;Thrombin light chain;Thrombin heavy chain	F2	sp|P18292|THRB_RAT Prothrombin OS=Rattus norvegicus OX=10116 GN=F2 PE=1 SV=1	34.7	70.411	1322000	1520300	1075300	1212900	1403300	1503000	1378900	1307400	1520300	1384400	1464200	1056600	1419800	1540400	1342500	1453100
698	P18297	P18297	Sepiapterin reductase	Spr	sp|P18297|SPRE_RAT Sepiapterin reductase OS=Rattus norvegicus OX=10116 GN=Spr PE=1 SV=1	59.2	28.128	408950	610110	800650	536960	464010	526790	510840	346540	447130	682630	616230	518930	616130	580500	573560	515350
699	P18298;P13444	P18298	S-adenosylmethionine synthase isoform type-2	Mat2a	sp|P18298|METK2_RAT S-adenosylmethionine synthase isoform type-2 OS=Rattus norvegicus OX=10116 GN=Mat2a PE=1 SV=1	31.1	43.715	1712400	2011000	2534700	1483600	1552400	1859800	1720500	1762000	1481400	2100100	1572000	1230900	1747800	2289500	1793500	1631800
700	P18395	P18395	Cold shock domain-containing protein E1	Csde1	sp|P18395|CSDE1_RAT Cold shock domain-containing protein E1 OS=Rattus norvegicus OX=10116 GN=Csde1 PE=2 SV=1	16.5	88.894	300210	362280	424120	296920	283140	340520	322310	264270	337540	422910	265230	288800	305610	452460	340900	294190
701	P18418	P18418	Calreticulin	Calr	sp|P18418|CALR_RAT Calreticulin OS=Rattus norvegicus OX=10116 GN=Calr PE=1 SV=1	67.5	47.995	4498800	4056200	3827700	3834000	3507800	3794000	3945000	4439700	3383300	4914100	4116100	3606400	4080800	3364700	4484400	4501200
702	P18420	P18420	Proteasome subunit alpha type-1	Psma1	sp|P18420|PSA1_RAT Proteasome subunit alpha type-1 OS=Rattus norvegicus OX=10116 GN=Psma1 PE=1 SV=2	49	29.517	1153300	1096300	1853700	1098700	1025700	1155700	1236200	768680	1819500	1693800	927090	1432000	1255400	1902100	1754800	1408200
703	P18421	P18421	Proteasome subunit beta type-1	Psmb1	sp|P18421|PSB1_RAT Proteasome subunit beta type-1 OS=Rattus norvegicus OX=10116 GN=Psmb1 PE=1 SV=3	49.6	26.479	871860	1279200	2049300	1051900	881860	1164000	1301500	674060	1831700	2410900	815170	1379000	1062400	2078000	1593900	1108900
704	P18422	P18422	Proteasome subunit alpha type-3	Psma3	sp|P18422|PSA3_RAT Proteasome subunit alpha type-3 OS=Rattus norvegicus OX=10116 GN=Psma3 PE=1 SV=3	40.4	28.419	1046200	1015500	3395900	1061000	1038500	1097700	1141200	808090	1507700	1630400	886730	1204500	1099800	1444900	1355800	1173600
705	P18437	P18437	Non-histone chromosomal protein HMG-17	Hmgn2	sp|P18437|HMGN2_RAT Non-histone chromosomal protein HMG-17 OS=Rattus norvegicus OX=10116 GN=Hmgn2 PE=1 SV=2	40	9.3654	0	0	98081	21631	0	23421	0	37064	0	201340	0	122360	164000	155870	130050	59940
706	P18445	P18445	60S ribosomal protein L27a	Rpl27a	sp|P18445|RL27A_RAT 60S ribosomal protein L27a OS=Rattus norvegicus OX=10116 GN=Rpl27a PE=1 SV=3	32.4	16.618	1265100	774770	503270	1178500	1631000	1295600	1457400	1372200	948870	869110	1367200	1229900	1126100	757420	1125500	1102100
707	P18484	P18484	AP-2 complex subunit alpha-2	Ap2a2	sp|P18484|AP2A2_RAT AP-2 complex subunit alpha-2 OS=Rattus norvegicus OX=10116 GN=Ap2a2 PE=1 SV=3	38.8	104.04	1820200	2083200	2064300	1770500	1345900	1678500	1727900	1643800	1858400	2457100	2133900	1975800	2131400	1967900	1984500	1881600
708	P18596;P18596-1	P18596;P18596-1	Sarcoplasmic/endoplasmic reticulum calcium ATPase 3	Atp2a3	sp|P18596|AT2A3_RAT Sarcoplasmic/endoplasmic reticulum calcium ATPase 3 OS=Rattus norvegicus OX=10116 GN=Atp2a3 PE=1 SV=3;sp|P18596-1|AT2A3_RAT Isoform SERCA3BC of Sarcoplasmic/endoplasmic reticulum calcium ATPase 3 OS=Rattus norvegicus OX=10116 GN=Atp2a3	13.4	109.36	120020	178740	241000	119240	0	119230	141660	0	144870	259210	167740	0	0	318080	165060	0
709	P18614	P18614	Integrin alpha-1	Itga1	sp|P18614|ITA1_RAT Integrin alpha-1 OS=Rattus norvegicus OX=10116 GN=Itga1 PE=1 SV=1	13.1	130.81	442770	375930	531600	293010	228930	316650	345260	310290	418140	513640	452000	362110	440700	342570	448130	322420
710	P18666	P18666	Myosin regulatory light chain 12B	Myl12b	sp|P18666|ML12B_RAT Myosin regulatory light chain 12B OS=Rattus norvegicus OX=10116 GN=Myl12b PE=1 SV=3	51.7	19.838	0	0	0	0	0	0	0	0	0	0	0	0	0	0	0	643.78
711	P18886	P18886	Carnitine O-palmitoyltransferase 2, mitochondrial	Cpt2	sp|P18886|CPT2_RAT Carnitine O-palmitoyltransferase 2, mitochondrial OS=Rattus norvegicus OX=10116 GN=Cpt2 PE=1 SV=1	58.7	74.109	19322000	24977000	11135000	19841000	20838000	19838000	21074000	20224000	24338000	26135000	24205000	23759000	22046000	27035000	21613000	23108000
712	P19139	P19139	Casein kinase II subunit alpha	Csnk2a1	sp|P19139|CSK21_RAT Casein kinase II subunit alpha OS=Rattus norvegicus OX=10116 GN=Csnk2a1 PE=1 SV=2	40.2	45.073	648080	682910	465560	689190	700170	782100	833450	435650	819100	944760	909980	842660	815740	855680	951980	825140
713	P19234	P19234	NADH dehydrogenase [ubiquinone] flavoprotein 2, mitochondrial	Ndufv2	sp|P19234|NDUV2_RAT NADH dehydrogenase [ubiquinone] flavoprotein 2, mitochondrial OS=Rattus norvegicus OX=10116 GN=Ndufv2 PE=1 SV=2	75	27.378	28592000	32946000	42866000	26419000	28820000	29262000	28215000	31466000	32638000	32078000	30799000	26920000	27029000	29719000	30221000	24299000
714	P19332-2;P19332;P19332-8;P19332-7;P19332-6;P19332-3;P19332-5;P19332-4	P19332-2;P19332;P19332-8	Microtubule-associated protein tau	Mapt	sp|P19332-2|TAU_RAT Isoform Tau-B of Microtubule-associated protein tau OS=Rattus norvegicus OX=10116 GN=Mapt;sp|P19332|TAU_RAT Microtubule-associated protein tau OS=Rattus norvegicus OX=10116 GN=Mapt PE=1 SV=3;sp|P19332-8|TAU_RAT Isoform Tau-H of Microtub	40.7	71.773	1034400	1313700	1933200	929970	955300	1044800	1122400	1088600	535120	1048700	678160	496460	611050	758670	662370	529370
715	P19356;P19356-2	P19356;P19356-2	Porphobilinogen deaminase	Hmbs	sp|P19356|HEM3_RAT Porphobilinogen deaminase OS=Rattus norvegicus OX=10116 GN=Hmbs PE=1 SV=2;sp|P19356-2|HEM3_RAT Isoform 2 of Porphobilinogen deaminase OS=Rattus norvegicus OX=10116 GN=Hmbs	46.5	39.361	692020	647850	544170	744650	711430	744660	661070	532710	239100	597490	799480	704210	827670	371490	735740	651100
716	P19357	P19357	Solute carrier family 2, facilitated glucose transporter member 4	Slc2a4	sp|P19357|GLUT4_RAT Solute carrier family 2, facilitated glucose transporter member 4 OS=Rattus norvegicus OX=10116 GN=Slc2a4 PE=1 SV=1	16.7	54.895	844460	1020300	1352200	880740	978540	909780	922910	732600	946790	906920	745030	627060	503730	846420	646960	761600
717	P19468	P19468	Glutamate--cysteine ligase catalytic subunit	Gclc	sp|P19468|GSH1_RAT Glutamate--cysteine ligase catalytic subunit OS=Rattus norvegicus OX=10116 GN=Gclc PE=1 SV=2	6.9	72.618	0	79871	0	64224	0	60452	82469	0	51071	70936	0	0	0	94057	53827	0
718	P19511	P19511	ATP synthase F(0) complex subunit B1, mitochondrial	Atp5f1	sp|P19511|AT5F1_RAT ATP synthase F(0) complex subunit B1, mitochondrial OS=Rattus norvegicus OX=10116 GN=Atp5pb PE=1 SV=1	62.1	28.868	25248000	25549000	10753000	25582000	25904000	25684000	24587000	23646000	28485000	25897000	25576000	26562000	25148000	30068000	27196000	27187000
719	P19527	P19527	Neurofilament light polypeptide	Nefl	sp|P19527|NFL_RAT Neurofilament light polypeptide OS=Rattus norvegicus OX=10116 GN=Nefl PE=1 SV=3	7.2	61.335	0	0	0	0	0	0	0	0	0	0	26960	0	50825	0	0	0
720	P19633	P19633	Calsequestrin-1	Casq1	sp|P19633|CASQ1_RAT Calsequestrin-1 OS=Rattus norvegicus OX=10116 GN=Casq1 PE=1 SV=2	5.4	46.448	0	0	0	0	0	0	0	0	0	0	0	0	0	0	0	26079
721	P19686	P19686	Guanylate cyclase soluble subunit alpha-3	Gucy1a3	sp|P19686|GCYA1_RAT Guanylate cyclase soluble subunit alpha-1 OS=Rattus norvegicus OX=10116 GN=Gucy1a1 PE=1 SV=1	3.8	77.566	0	0	0	0	0	0	0	0	0	0	0	0	0	0	0	25261
722	P19804	P19804	Nucleoside diphosphate kinase B	Nme2	sp|P19804|NDKB_RAT Nucleoside diphosphate kinase B OS=Rattus norvegicus OX=10116 GN=Nme2 PE=1 SV=1	82.9	17.283	4188600	4921400	4815800	4795600	4120200	5454100	7889200	3448700	9669600	7465700	5377900	8431600	6302300	13408000	8934300	9508100
723	P19836;Q9QZC4	P19836;Q9QZC4	Choline-phosphate cytidylyltransferase A;Choline-phosphate cytidylyltransferase B	Pcyt1a;Pcyt1b	sp|P19836|PCY1A_RAT Choline-phosphate cytidylyltransferase A OS=Rattus norvegicus OX=10116 GN=Pcyt1a PE=1 SV=2;sp|Q9QZC4|PCY1B_RAT Choline-phosphate cytidylyltransferase B OS=Rattus norvegicus OX=10116 GN=Pcyt1b PE=1 SV=1	37.6	41.68	354690	384090	251270	369000	338510	397860	329180	306770	413620	637450	569040	536460	560140	587600	517330	495050
724	P19939	P19939	Apolipoprotein C-I;Truncated apolipoprotein C-I	Apoc1	sp|P19939|APOC1_RAT Apolipoprotein C-I OS=Rattus norvegicus OX=10116 GN=Apoc1 PE=3 SV=1	12.5	9.8606	0	0	0	0	0	0	21201	0	19021	44100	38357	31611	0	104600	35752	0
725	P19944	P19944	60S acidic ribosomal protein P1	Rplp1	sp|P19944|RLA1_RAT 60S acidic ribosomal protein P1 OS=Rattus norvegicus OX=10116 GN=Rplp1 PE=3 SV=1	99.1	11.498	2995600	2892100	3934800	3348900	3171300	2928700	3548600	3618800	3717900	4638500	4048800	3608300	3516600	3153400	3654300	3158000
726	P19945	P19945	60S acidic ribosomal protein P0	Rplp0	sp|P19945|RLA0_RAT 60S acidic ribosomal protein P0 OS=Rattus norvegicus OX=10116 GN=Rplp0 PE=1 SV=2	59.6	34.215	12174000	13119000	7417700	11114000	9693100	10893000	12558000	9025300	11994000	17665000	13012000	13354000	14797000	13932000	13394000	13743000
727	P20059	P20059	Hemopexin	Hpx	sp|P20059|HEMO_RAT Hemopexin OS=Rattus norvegicus OX=10116 GN=Hpx PE=1 SV=3	49.3	51.35	5106100	7320800	7096400	6053000	6144100	6495400	6123500	5616400	4579900	3445400	3703400	3165900	3366900	5208700	3114300	3910300
728	P20069	P20069	Mitochondrial-processing peptidase subunit alpha	Pmpca	sp|P20069|MPPA_RAT Mitochondrial-processing peptidase subunit alpha OS=Rattus norvegicus OX=10116 GN=Pmpca PE=1 SV=1	37.8	58.607	1261100	1266300	896410	1495100	1528400	1850300	1414100	1428100	1462700	882390	1640500	1368600	1462500	1267600	1519400	1325700
729	P20070-3;P20070;P20070-2	P20070-3;P20070;P20070-2	NADH-cytochrome b5 reductase 3;NADH-cytochrome b5 reductase 3 membrane-bound form;NADH-cytochrome b5 reductase 3 soluble form	Cyb5r3	sp|P20070-3|NB5R3_RAT Isoform 3 of NADH-cytochrome b5 reductase 3 OS=Rattus norvegicus OX=10116 GN=Cyb5r3;sp|P20070|NB5R3_RAT NADH-cytochrome b5 reductase 3 OS=Rattus norvegicus OX=10116 GN=Cyb5r3 PE=1 SV=2;sp|P20070-2|NB5R3_RAT Isoform 2 of NADH-cytochrom	67.3	31.591	2731300	3253800	2346500	2525400	2625800	2616900	2924100	2861300	3726100	5089400	3983700	3805400	3733200	4337800	4100000	3653200
730	P20171	P20171	GTPase HRas;GTPase HRas, N-terminally processed	Hras	sp|P20171|RASH_RAT GTPase HRas OS=Rattus norvegicus OX=10116 GN=Hras PE=1 SV=2	69.3	21.298	228250	337240	409000	245470	327150	335260	255530	343320	434470	358190	311370	309940	235720	376550	232300	257580
731	P20280	P20280	60S ribosomal protein L21	Rpl21	sp|P20280|RL21_RAT 60S ribosomal protein L21 OS=Rattus norvegicus OX=10116 GN=Rpl21 PE=1 SV=3	38.1	18.465	2932100	2626900	3201700	3001300	3082000	3299500	2939300	2643500	5020100	5386700	3303800	4237100	3119900	4361500	3142400	3533200
732	P20417	P20417	Tyrosine-protein phosphatase non-receptor type 1	Ptpn1	sp|P20417|PTN1_RAT Tyrosine-protein phosphatase non-receptor type 1 OS=Rattus norvegicus OX=10116 GN=Ptpn1 PE=1 SV=1	12	49.674	0	34373	216430	59568	44827	0	0	0	0	102150	44652	0	0	65426	52840	50489
733	P20595	P20595	Guanylate cyclase soluble subunit beta-1	Gucy1b3	sp|P20595|GCYB1_RAT Guanylate cyclase soluble subunit beta-1 OS=Rattus norvegicus OX=10116 GN=Gucy1b1 PE=1 SV=2	4	70.456	39147	45360	0	39081	0	42761	44222	35011	37047	53457	41579	40067	45391	0	48560	39889
734	P20650	P20650	Protein phosphatase 1A	Ppm1a	sp|P20650|PPM1A_RAT Protein phosphatase 1A OS=Rattus norvegicus OX=10116 GN=Ppm1a PE=1 SV=1	39.8	42.416	776460	887940	1029400	840150	884610	882000	879520	919180	754920	1155300	831400	745590	810720	861790	881210	786670
735	P20651	P20651	Serine/threonine-protein phosphatase 2B catalytic subunit beta isoform	Ppp3cb	sp|P20651|PP2BB_RAT Serine/threonine-protein phosphatase 2B catalytic subunit beta isoform OS=Rattus norvegicus OX=10116 GN=Ppp3cb PE=1 SV=1	24.2	59.113	385560	244030	822170	265060	339980	354100	0	245480	206860	362820	406280	299930	277850	253450	253110	292850
736	P20673	P20673	Argininosuccinate lyase	Asl	sp|P20673|ARLY_RAT Argininosuccinate lyase OS=Rattus norvegicus OX=10116 GN=Asl PE=2 SV=1	9.8	51.549	53403	0	0	17300	0	125330	62751	135540	0	0	74673	0	90681	0	0	0
737	P20689	P20689	Myosin light chain kinase 2, skeletal/cardiac muscle	Mylk2	sp|P20689|MYLK2_RAT Myosin light chain kinase 2, skeletal/cardiac muscle OS=Rattus norvegicus OX=10116 GN=Mylk2 PE=1 SV=2	2	65.815	0	0	0	0	0	0	0	0	0	0	0	0	0	48432	0	0
738	P20759	P20759	Ig gamma-1 chain C region		sp|P20759|IGHG1_RAT Ig gamma-1 chain C region OS=Rattus norvegicus OX=10116 PE=1 SV=1	27.3	35.945	0	0	0	0	148070	74340	0	0	366890	499360	559810	198850	834720	165830	398640	256560
739	P20760	P20760	Ig gamma-2A chain C region	Igg-2a	sp|P20760|IGG2A_RAT Ig gamma-2A chain C region OS=Rattus norvegicus OX=10116 GN=Igg-2a PE=1 SV=1	54.7	35.185	1400300	1701000	2658300	1589000	1617000	1808900	1699500	1370900	2456000	2605400	3720900	3160100	2309600	3927300	2070700	3300900
740	P20761	P20761	Ig gamma-2B chain C region	Igh-1a	sp|P20761|IGG2B_RAT Ig gamma-2B chain C region OS=Rattus norvegicus OX=10116 GN=Igh-1a PE=1 SV=1	26.4	36.497	294190	402520	486880	295720	292380	360210	408210	262990	345340	887570	818830	801370	659000	910980	542540	754600
741	P20762	P20762	Ig gamma-2C chain C region		sp|P20762|IGG2C_RAT Ig gamma-2C chain C region OS=Rattus norvegicus OX=10116 PE=2 SV=1	18.2	36.571	187900	106890	176180	108550	109530	194380	151060	136690	87691	132560	163750	233680	104190	466370	89373	223590
742	P20767	P20767	Ig lambda-2 chain C region		sp|P20767|LAC2_RAT Ig lambda-2 chain C region OS=Rattus norvegicus OX=10116 PE=4 SV=1	76.9	11.318	59551	151780	279290	102160	106920	108240	126790	271200	225460	273530	214110	192560	187320	343230	123580	231870
743	P20788	P20788	Cytochrome b-c1 complex subunit Rieske, mitochondrial;Cytochrome b-c1 complex subunit 11	Uqcrfs1	sp|P20788|UCRI_RAT Cytochrome b-c1 complex subunit Rieske, mitochondrial OS=Rattus norvegicus OX=10116 GN=Uqcrfs1 PE=1 SV=2	58	29.445	25550000	29824000	27438000	24201000	23185000	22823000	28091000	25693000	29661000	33245000	29106000	29313000	26617000	36268000	26632000	26707000
744	P21139	P21139	Alpha-mannosidase 2C1	Man2c1	sp|P21139|MA2C1_RAT Alpha-mannosidase 2C1 OS=Rattus norvegicus OX=10116 GN=Man2c1 PE=1 SV=1	16.6	115.97	539780	578430	229590	760780	548910	716560	640000	634330	557910	879860	549930	638460	621590	594590	615050	550760
745	P21263;P21263-2	P21263;P21263-2	Nestin	Nes	sp|P21263|NEST_RAT Nestin OS=Rattus norvegicus OX=10116 GN=Nes PE=1 SV=2;sp|P21263-2|NEST_RAT Isoform 2 of Nestin OS=Rattus norvegicus OX=10116 GN=Nes	22.5	208.79	699300	985030	1714600	596130	505520	536340	693510	472690	705650	714570	353400	202980	337490	505040	396070	286480
746	P21396	P21396	Amine oxidase [flavin-containing] A	Maoa	sp|P21396|AOFA_RAT Amine oxidase [flavin-containing] A OS=Rattus norvegicus OX=10116 GN=Maoa PE=1 SV=1	45.2	59.507	2060900	2507500	2684200	2183100	1874300	2186400	2490100	2415800	1054400	853830	778360	701380	801150	949530	827100	640350
747	P21531	P21531	60S ribosomal protein L3	Rpl3	sp|P21531|RL3_RAT 60S ribosomal protein L3 OS=Rattus norvegicus OX=10116 GN=Rpl3 PE=1 SV=3	43.7	46.135	1293700	1519100	2541800	1168700	1254900	1163500	1010500	1078900	1131900	3162300	1616700	1447000	1410400	2267700	1909000	1207400
748	P21533	P21533	60S ribosomal protein L6	Rpl6	sp|P21533|RL6_RAT 60S ribosomal protein L6 OS=Rattus norvegicus OX=10116 GN=Rpl6 PE=1 SV=5	29.5	33.561	2381300	3299100	2430900	2278900	1834100	2410600	2343100	1937900	2460200	4216600	2829100	2696500	2918800	3621900	3019900	2610300
749	P21571	P21571	ATP synthase-coupling factor 6, mitochondrial	Atp5j	sp|P21571|ATP5J_RAT ATP synthase-coupling factor 6, mitochondrial OS=Rattus norvegicus OX=10116 GN=Atp5pf PE=1 SV=1	60.2	12.494	14873000	16905000	6400400	14659000	14519000	16072000	15694000	13119000	16210000	17687000	17209000	15346000	15053000	15703000	16999000	14462000
750	P21575-7;P21575-3;P21575-6;P21575-2;P21575-8;P21575-4;P21575-5;P21575	P21575-7;P21575-3;P21575-6;P21575-2;P21575-8;P21575-4;P21575-5;P21575	Dynamin-1	Dnm1	sp|P21575-7|DYN1_RAT Isoform 7 of Dynamin-1 OS=Rattus norvegicus OX=10116 GN=Dnm1;sp|P21575-3|DYN1_RAT Isoform 3 of Dynamin-1 OS=Rattus norvegicus OX=10116 GN=Dnm1;sp|P21575-6|DYN1_RAT Isoform 6 of Dynamin-1 OS=Rattus norvegicus OX=10116 GN=Dnm1;sp|P21575-	15.1	92.504	45325	0	26086	49322	0	34049	0	47716	48305	146960	62074	0	116020	44302	0	78906
751	P21588	P21588	5-nucleotidase	Nt5e	sp|P21588|5NTD_RAT 5-nucleotidase OS=Rattus norvegicus OX=10116 GN=Nt5e PE=1 SV=1	25.3	63.968	527330	648750	399220	627940	432480	612730	691960	640440	315610	425330	474930	337970	599640	534910	532850	282450
752	P21670	P21670	Proteasome subunit alpha type-4	Psma4	sp|P21670|PSA4_RAT Proteasome subunit alpha type-4 OS=Rattus norvegicus OX=10116 GN=Psma4 PE=1 SV=1	55.6	29.497	763580	896700	1904400	758590	605020	760420	908620	500620	1288200	1317200	659890	1034600	1003900	1851000	1690700	1103100
753	P21708;P21708-2	P21708;P21708-2	Mitogen-activated protein kinase 3	Mapk3	sp|P21708|MK03_RAT Mitogen-activated protein kinase 3 OS=Rattus norvegicus OX=10116 GN=Mapk3 PE=1 SV=5;sp|P21708-2|MK03_RAT Isoform 2 of Mitogen-activated protein kinase 3 OS=Rattus norvegicus OX=10116 GN=Mapk3	49.2	43.08	761290	688200	1469400	738120	696150	654430	707730	595050	782850	913610	697030	594380	641330	799080	701390	600460
754	P21775;P07871;P21775-2	P21775;P07871;P21775-2	3-ketoacyl-CoA thiolase A, peroxisomal;3-ketoacyl-CoA thiolase B, peroxisomal	Acaa1a;Acaa1b	sp|P21775|THIKA_RAT 3-ketoacyl-CoA thiolase A, peroxisomal OS=Rattus norvegicus OX=10116 GN=Acaa1a PE=1 SV=3;sp|P07871|THIKB_RAT 3-ketoacyl-CoA thiolase B, peroxisomal OS=Rattus norvegicus OX=10116 GN=Acaa1b PE=1 SV=2;sp|P21775-2|THIKA_RAT Isoform 2 of 3-k	56.9	44.839	935720	1137000	1594600	851590	454190	1119900	872330	732550	516060	1064200	576940	561310	786580	796720	894490	553490
755	P21807	P21807	Peripherin	Prph	sp|P21807|PERI_RAT Peripherin OS=Rattus norvegicus OX=10116 GN=Prph PE=1 SV=1	33.3	53.549	120370	323540	166640	134510	46649	173280	215770	319560	33365	510300	380970	241050	485920	192420	398370	197980
756	P21913	P21913	Succinate dehydrogenase [ubiquinone] iron-sulfur subunit, mitochondrial	Sdhb	sp|P21913|SDHB_RAT Succinate dehydrogenase [ubiquinone] iron-sulfur subunit, mitochondrial OS=Rattus norvegicus OX=10116 GN=Sdhb PE=2 SV=2	69.9	31.83	19818000	23037000	10557000	19050000	18295000	20395000	20353000	15339000	20993000	19841000	16846000	16863000	18040000	20296000	17979000	16688000
757	P22002-3;P22002-2;P22002;P22002-4;P22002-5;P27732-12;P27732-9;P27732-10;P27732-4;P27732-7;P27732-5;P27732-8;P27732;P27732-3;P27732-6	P22002-3;P22002-2;P22002;P22002-4;P22002-5	Voltage-dependent L-type calcium channel subunit alpha-1C	Cacna1c	sp|P22002-3|CAC1C_RAT Isoform 3 of Voltage-dependent L-type calcium channel subunit alpha-1C OS=Rattus norvegicus OX=10116 GN=Cacna1c;sp|P22002-2|CAC1C_RAT Isoform 1 of Voltage-dependent L-type calcium channel subunit alpha-1C OS=Rattus norvegicus OX=10116	4.6	242.31	123640	205350	188910	111440	155170	130150	137860	61350	184600	212980	145400	156750	222550	180300	191640	160500
758	P22062	P22062	Protein-L-isoaspartate(D-aspartate) O-methyltransferase	Pcmt1	sp|P22062|PIMT_RAT Protein-L-isoaspartate(D-aspartate) O-methyltransferase OS=Rattus norvegicus OX=10116 GN=Pcmt1 PE=1 SV=2	67	24.641	4789900	4344100	3793100	4270700	4497100	4648800	4854700	5158100	4497600	4753700	4817800	4104300	4804400	4722500	4644200	4422200
759	P22509	P22509	rRNA 2-O-methyltransferase fibrillarin	Fbl	sp|P22509|FBRL_RAT rRNA 2-O-methyltransferase fibrillarin OS=Rattus norvegicus OX=10116 GN=Fbl PE=1 SV=2	36.4	34.221	396470	409040	504420	329430	250220	294180	366430	262410	353000	665020	390540	380060	410030	484750	444220	350400
760	P22734-2;P22734	P22734-2;P22734	Catechol O-methyltransferase	Comt	sp|P22734-2|COMT_RAT Isoform Soluble of Catechol O-methyltransferase OS=Rattus norvegicus OX=10116 GN=Comt;sp|P22734|COMT_RAT Catechol O-methyltransferase OS=Rattus norvegicus OX=10116 GN=Comt PE=1 SV=2	58.4	24.747	816390	839470	502290	810870	595240	891380	923130	824110	613360	799710	816550	793920	713620	775140	770550	776490
761	P22791	P22791	Hydroxymethylglutaryl-CoA synthase, mitochondrial	Hmgcs2	sp|P22791|HMCS2_RAT Hydroxymethylglutaryl-CoA synthase, mitochondrial OS=Rattus norvegicus OX=10116 GN=Hmgcs2 PE=1 SV=2	37.6	56.885	34354	18693	33163	16948	12604	36530	38923	67719	74221	2812500	2134200	3891700	604380	2512500	2177300	2481700
762	P22985;Q5QE80;Q5QE79	P22985	Xanthine dehydrogenase/oxidase;Xanthine dehydrogenase;Xanthine oxidase	Xdh	sp|P22985|XDH_RAT Xanthine dehydrogenase/oxidase OS=Rattus norvegicus OX=10116 GN=Xdh PE=1 SV=3	11.6	146.24	377830	749760	791270	452890	373590	403360	456310	96847	672260	527530	689430	539690	420790	749640	616520	652050
763	P23348	P23348	Anion exchange protein 3	Slc4a3	sp|P23348|B3A3_RAT Anion exchange protein 3 OS=Rattus norvegicus OX=10116 GN=Slc4a3 PE=1 SV=1	7.9	135.41	0	134320	0	85863	0	169130	143070	0	188960	161530	137820	139750	126080	139720	122500	124940
764	P23358	P23358	60S ribosomal protein L12	Rpl12	sp|P23358|RL12_RAT 60S ribosomal protein L12 OS=Rattus norvegicus OX=10116 GN=Rpl12 PE=2 SV=1	60.6	17.845	2601900	3075400	2678000	2501000	2417300	2595900	2500800	2609300	2917200	2866800	2892200	2481700	2910700	2554400	2924300	3119700
765	P23457;Q6AYQ2;P51652	P23457	3-alpha-hydroxysteroid dehydrogenase	Akr1c9	sp|P23457|DIDH_RAT 3-alpha-hydroxysteroid dehydrogenase OS=Rattus norvegicus OX=10116 GN=Akr1c9 PE=1 SV=1	40.7	37.027	1092100	1317200	2012600	1056500	1140500	1033500	1011900	917670	1275100	2082100	1555600	1216700	1692000	1608900	1830000	1300200
766	P23514	P23514	Coatomer subunit beta	Copb1	sp|P23514|COPB_RAT Coatomer subunit beta OS=Rattus norvegicus OX=10116 GN=Copb1 PE=1 SV=1	32	107.01	1966800	2210100	1395300	1829500	1501900	1695700	2057600	1547500	1908800	2395200	2128400	1898300	2249900	2252400	2145700	1924000
767	P23562;P23562-2	P23562;P23562-2	Band 3 anion transport protein	Slc4a1	sp|P23562|B3AT_RAT Band 3 anion transport protein OS=Rattus norvegicus OX=10116 GN=Slc4a1 PE=1 SV=3;sp|P23562-2|B3AT_RAT Isoform 2 of Band 3 anion transport protein OS=Rattus norvegicus OX=10116 GN=Slc4a1	38	103.17	2971300	2924200	4813500	2608000	2727700	2604800	2638400	2252100	3332000	3198000	2969300	3008000	2797200	3157700	2232500	3074800
768	P23693	P23693	Troponin I, cardiac muscle	Tnni3	sp|P23693|TNNI3_RAT Troponin I, cardiac muscle OS=Rattus norvegicus OX=10116 GN=Tnni3 PE=1 SV=2	69.7	24.159	57991000	79436000	121960000	58187000	65463000	61677000	57048000	64383000	72370000	70314000	62264000	55586000	56976000	74986000	60535000	52223000
769	P23711;O70453	P23711	Heme oxygenase 2	Hmox2	sp|P23711|HMOX2_RAT Heme oxygenase 2 OS=Rattus norvegicus OX=10116 GN=Hmox2 PE=1 SV=1	43.2	35.762	112110	178890	352520	116210	72169	102280	91815	96256	114510	278710	141780	101350	131910	175460	116580	104720
770	P23764	P23764	Glutathione peroxidase 3	Gpx3	sp|P23764|GPX3_RAT Glutathione peroxidase 3 OS=Rattus norvegicus OX=10116 GN=Gpx3 PE=2 SV=2	21.2	25.424	745180	664430	480840	680830	502970	665920	833310	557910	1093000	770170	931740	740190	1150900	791010	895910	715730
771	P23785	P23785	Granulins;Acrogranin;Granulin-1;Granulin-2;Granulin-3;Granulin-4;Granulin-5;Granulin-6;Granulin-7	Grn	sp|P23785|GRN_RAT Progranulin OS=Rattus norvegicus OX=10116 GN=Grn PE=1 SV=3	17	63.369	548050	673520	1249300	521150	416050	485580	571970	450860	710330	952320	776330	678280	927290	776340	898980	645160
772	P23928	P23928	Alpha-crystallin B chain	Cryab	sp|P23928|CRYAB_RAT Alpha-crystallin B chain OS=Rattus norvegicus OX=10116 GN=Cryab PE=1 SV=1	93.7	20.089	47651000	53283000	44354000	49237000	54113000	56233000	50285000	55772000	47402000	36915000	46147000	39594000	39606000	40360000	38140000	40522000
773	P23965	P23965	Enoyl-CoA delta isomerase 1, mitochondrial	Eci1	sp|P23965|ECI1_RAT Enoyl-CoA delta isomerase 1, mitochondrial OS=Rattus norvegicus OX=10116 GN=Eci1 PE=1 SV=1	61.6	32.254	17060000	18451000	19772000	18438000	19739000	19243000	16935000	17618000	17460000	18708000	20301000	21168000	18868000	18062000	17949000	19510000
774	P24049	P24049	60S ribosomal protein L17	Rpl17	sp|P24049|RL17_RAT 60S ribosomal protein L17 OS=Rattus norvegicus OX=10116 GN=Rpl17 PE=2 SV=3	50	21.397	1552000	1442000	1032300	1374100	1352300	1587100	1504300	1507200	1496600	1300800	1732000	1791800	1818200	1378100	1633500	1874100
775	P24050	P24050	40S ribosomal protein S5;40S ribosomal protein S5, N-terminally processed	Rps5	sp|P24050|RS5_RAT 40S ribosomal protein S5 OS=Rattus norvegicus OX=10116 GN=Rps5 PE=1 SV=3	40.7	22.878	3035600	3691100	7689300	2950300	2583400	2944300	2746500	2560500	3482100	3778200	3511600	3210000	3255900	3504600	3842600	2826900
776	P24051	P24051	40S ribosomal protein S27-like	Rps27l	sp|P24051|RS27L_RAT 40S ribosomal protein S27-like OS=Rattus norvegicus OX=10116 GN=Rps27l PE=1 SV=3	41.7	9.4771	118250	122660	0	99443	104020	115430	104720	0	120860	164140	0	138250	124960	133000	129010	133150
777	P24090	P24090	Alpha-2-HS-glycoprotein	Ahsg	sp|P24090|FETUA_RAT Alpha-2-HS-glycoprotein OS=Rattus norvegicus OX=10116 GN=Ahsg PE=1 SV=2	48.3	37.982	13740000	12713000	8658600	14064000	11870000	13950000	14475000	12749000	9327900	12008000	12265000	11537000	13247000	12110000	10853000	14326000
778	P24155	P24155	Thimet oligopeptidase	Thop1	sp|P24155|THOP1_RAT Thimet oligopeptidase OS=Rattus norvegicus OX=10116 GN=Thop1 PE=1 SV=4	34.9	78.385	940830	1381500	1689600	1081600	1084000	1053700	1127200	972920	847150	1321600	1041200	884610	1038200	1149300	1177300	1039900
779	P24268	P24268	Cathepsin D;Cathepsin D 12 kDa light chain;Cathepsin D 9 kDa light chain;Cathepsin D 34 kDa heavy chain;Cathepsin D 30 kDa heavy chain	Ctsd	sp|P24268|CATD_RAT Cathepsin D OS=Rattus norvegicus OX=10116 GN=Ctsd PE=1 SV=1	41.8	44.68	4180000	5412100	8186300	5700900	3638300	4449600	4845100	4011800	4898600	7988100	4550800	4324500	5013300	7315400	6116800	5224900
780	P24329	P24329	Thiosulfate sulfurtransferase	Tst	sp|P24329|THTR_RAT Thiosulfate sulfurtransferase OS=Rattus norvegicus OX=10116 GN=Tst PE=1 SV=3	43.8	33.406	2042900	2910900	2388900	2232800	2198200	2283800	2573600	1904000	2995300	4178000	3041500	2534100	2902600	3094400	3086800	2559300
781	P24368	P24368	Peptidyl-prolyl cis-trans isomerase B	Ppib	sp|P24368|PPIB_RAT Peptidyl-prolyl cis-trans isomerase B OS=Rattus norvegicus OX=10116 GN=Ppib PE=1 SV=3	63	23.802	2696800	2315300	2201400	2736100	2455900	2791300	2880200	2742300	2693800	1978500	3321900	3085100	3434000	2177800	3231900	2664800
782	P24473	P24473	Glutathione S-transferase kappa 1	Gstk1	sp|P24473|GSTK1_RAT Glutathione S-transferase kappa 1 OS=Rattus norvegicus OX=10116 GN=Gstk1 PE=1 SV=3	65	25.493	2310200	3047000	2861000	2626400	2483600	2387200	2747800	2190100	2609700	2196900	2047200	1821400	1678300	2101000	1942500	1750800
783	P24483	P24483	Adrenodoxin, mitochondrial	Fdx1	sp|P24483|ADX_RAT Adrenodoxin, mitochondrial OS=Rattus norvegicus OX=10116 GN=Fdx1 PE=2 SV=1	33	20.135	774430	827830	1058400	785630	604470	753340	752250	845530	572120	559900	845580	712850	863410	854490	513290	693900
784	P25095	P25095	Type-1A angiotensin II receptor	Agtr1	sp|P25095|AGTRA_RAT Type-1A angiotensin II receptor OS=Rattus norvegicus OX=10116 GN=Agtr1 PE=1 SV=1	9.7	40.889	0	0	0	0	0	0	0	0	0	0	0	0	0	0	0	40621
785	P25113	P25113	Phosphoglycerate mutase 1	Pgam1	sp|P25113|PGAM1_RAT Phosphoglycerate mutase 1 OS=Rattus norvegicus OX=10116 GN=Pgam1 PE=1 SV=4	80.7	28.832	4124100	4386400	4538100	3734900	4446900	4616300	4793000	4914800	4739400	4478900	4760300	3298300	4288900	3518300	3741900	3684200
786	P25235	P25235	Dolichyl-diphosphooligosaccharide--protein glycosyltransferase subunit 2	Rpn2	sp|P25235|RPN2_RAT Dolichyl-diphosphooligosaccharide--protein glycosyltransferase subunit 2 OS=Rattus norvegicus OX=10116 GN=Rpn2 PE=2 SV=2	48.5	69.077	1444800	1521100	1500900	1383600	1295800	1359000	1374300	1580900	1438300	2187900	2060800	1831000	1863100	2022600	1682600	1846500
787	P25286-2;P25286	P25286-2;P25286	V-type proton ATPase 116 kDa subunit a isoform 1	Atp6v0a1	sp|P25286-2|VPP1_RAT Isoform II of V-type proton ATPase 116 kDa subunit a1 OS=Rattus norvegicus OX=10116 GN=Atp6v0a1;sp|P25286|VPP1_RAT V-type proton ATPase 116 kDa subunit a1 OS=Rattus norvegicus OX=10116 GN=Atp6v0a1 PE=1 SV=1	10.3	95.656	132090	183020	365430	112530	96533	118210	120840	0	111360	186380	130270	109220	106050	161390	108680	104830
788	P25304-3;P25304-4;P25304-2;P25304-5;P25304-6;P25304	P25304-3;P25304-4;P25304-2;P25304-5;P25304-6;P25304	Agrin;Agrin N-terminal 110 kDa subunit;Agrin C-terminal 110 kDa subunit;Agrin C-terminal 90 kDa fragment;Agrin C-terminal 22 kDa fragment	Agrn	sp|P25304-3|AGRIN_RAT Isoform 3 of Agrin OS=Rattus norvegicus OX=10116 GN=Agrn;sp|P25304-4|AGRIN_RAT Isoform 4 of Agrin OS=Rattus norvegicus OX=10116 GN=Agrn;sp|P25304-2|AGRIN_RAT Isoform 2 of Agrin OS=Rattus norvegicus OX=10116 GN=Agrn;sp|P25304-5|AGRIN_R	8.4	206.56	240480	369580	462850	217590	167750	227270	171420	270650	386930	436340	249980	179370	271920	363780	300220	188570
789	P25409	P25409	Alanine aminotransferase 1	Gpt	sp|P25409|ALAT1_RAT Alanine aminotransferase 1 OS=Rattus norvegicus OX=10116 GN=Gpt PE=1 SV=2	27.2	55.109	74644	214340	226400	118880	154290	129890	151080	131820	271050	303740	214900	178860	136410	249870	204150	155130
790	P25886	P25886	60S ribosomal protein L29	Rpl29	sp|P25886|RL29_RAT 60S ribosomal protein L29 OS=Rattus norvegicus OX=10116 GN=Rpl29 PE=1 SV=3	20.5	17.325	361640	465630	919420	350440	356720	381820	322030	213920	366030	749310	342510	332410	342270	549370	423350	371540
791	P25977-2;P25977	P25977-2;P25977	Nucleolar transcription factor 1	Ubtf	sp|P25977-2|UBF1_RAT Isoform UBF2 of Nucleolar transcription factor 1 OS=Rattus norvegicus OX=10116 GN=Ubtf;sp|P25977|UBF1_RAT Nucleolar transcription factor 1 OS=Rattus norvegicus OX=10116 GN=Ubtf PE=1 SV=1	13.3	84.967	135000	119110	244480	105430	95898	108120	131700	161750	120690	257930	211320	135910	168010	190120	211850	169640
792	P26284;Q06437	P26284	Pyruvate dehydrogenase E1 component subunit alpha, somatic form, mitochondrial	Pdha1	sp|P26284|ODPA_RAT Pyruvate dehydrogenase E1 component subunit alpha, somatic form, mitochondrial OS=Rattus norvegicus OX=10116 GN=Pdha1 PE=1 SV=2	85.4	43.226	27823000	29391000	24937000	28680000	31397000	30358000	27905000	27886000	32465000	25433000	27656000	27014000	24817000	28651000	29888000	27327000
793	P26342	P26342	Transforming growth factor beta receptor type 3	Tgfbr3	sp|P26342|TGBR3_RAT Transforming growth factor beta receptor type 3 OS=Rattus norvegicus OX=10116 GN=Tgfbr3 PE=1 SV=1	4.1	94.102	0	0	0	0	0	0	0	0	0	0	0	0	0	0	0	30749
794	P26376	P26376	Interferon-induced transmembrane protein 3	ifitm3	sp|P26376|IFM3_RAT Interferon-induced transmembrane protein 3 OS=Rattus norvegicus OX=10116 GN=ifitm3 PE=2 SV=1	42.3	14.971	84585	112150	364500	97298	41513	71291	0	0	173100	195300	100000	0	106870	140890	118580	150630
795	P26431	P26431	Sodium/hydrogen exchanger 1	Slc9a1	sp|P26431|SL9A1_RAT Sodium/hydrogen exchanger 1 OS=Rattus norvegicus OX=10116 GN=Slc9a1 PE=1 SV=2	8.9	91.646	38439	289110	244040	75479	0	0	0	94829	153780	242100	186860	131610	149120	211990	212000	0
796	P26453-2;P26453	P26453-2;P26453	Basigin	Bsg	sp|P26453-2|BASI_RAT Isoform 2 of Basigin OS=Rattus norvegicus OX=10116 GN=Bsg;sp|P26453|BASI_RAT Basigin OS=Rattus norvegicus OX=10116 GN=Bsg PE=1 SV=2	26.8	29.585	4807900	3968800	6134600	3820500	4821700	3958000	3454600	4400400	3734400	3808300	5320600	4564300	5402100	4588000	5328400	4534100
797	P26644	P26644	Beta-2-glycoprotein 1	Apoh	sp|P26644|APOH_RAT Beta-2-glycoprotein 1 OS=Rattus norvegicus OX=10116 GN=Apoh PE=2 SV=2	32.3	33.197	693820	733400	1176800	554970	622820	632690	675780	578610	669400	966270	803220	700190	780790	808500	725090	803900
798	P26772	P26772	10 kDa heat shock protein, mitochondrial	Hspe1	sp|P26772|CH10_RAT 10 kDa heat shock protein, mitochondrial OS=Rattus norvegicus OX=10116 GN=Hspe1 PE=1 SV=3	94.1	10.902	13394000	10371000	33921000	13431000	18893000	13571000	11550000	14364000	13954000	7592000	11966000	13157000	12225000	11866000	10250000	13807000
799	P26819;P26817	P26819;P26817	Beta-adrenergic receptor kinase 2;Beta-adrenergic receptor kinase 1	Adrbk2;Adrbk1	sp|P26819|ARBK2_RAT Beta-adrenergic receptor kinase 2 OS=Rattus norvegicus OX=10116 GN=Grk3 PE=2 SV=1;sp|P26817|ARBK1_RAT Beta-adrenergic receptor kinase 1 OS=Rattus norvegicus OX=10116 GN=Grk2 PE=1 SV=1	9.3	79.886	0	35747	0	65401	319890	50362	0	178710	0	0	0	45937	0	0	39308	0
800	P27008	P27008	Poly [ADP-ribose] polymerase 1	Parp1	sp|P27008|PARP1_RAT Poly [ADP-ribose] polymerase 1 OS=Rattus norvegicus OX=10116 GN=Parp1 PE=1 SV=4	41.9	112.66	1606400	1946500	1319800	1403000	1485600	1621000	1575700	1461100	1511500	2613700	2133700	2016700	2135600	2213500	2424900	2009200
801	P27139	P27139	Carbonic anhydrase 2	Ca2	sp|P27139|CAH2_RAT Carbonic anhydrase 2 OS=Rattus norvegicus OX=10116 GN=Ca2 PE=1 SV=2	65.8	29.113	1189800	785750	1026800	1287200	1096200	1279600	1241400	1231600	1537800	1184600	1199500	1304000	1206900	1036400	826000	1467800
802	P27274	P27274	CD59 glycoprotein	Cd59	sp|P27274|CD59_RAT CD59 glycoprotein OS=Rattus norvegicus OX=10116 GN=Cd59 PE=1 SV=2	13.5	13.79	137150	155490	153180	135100	98111	134670	66950	0	167640	0	144560	0	0	121210	137390	0
803	P27321-4;P27321-2;P27321;P27321-6;P27321-5;P27321-3;P27321-7	P27321-4;P27321-2;P27321;P27321-6;P27321-5;P27321-3	Calpastatin	Cast	sp|P27321-4|ICAL_RAT Isoform 4 of Calpastatin OS=Rattus norvegicus OX=10116 GN=Cast;sp|P27321-2|ICAL_RAT Isoform 2 of Calpastatin OS=Rattus norvegicus OX=10116 GN=Cast;sp|P27321|ICAL_RAT Calpastatin OS=Rattus norvegicus OX=10116 GN=Cast PE=1 SV=3;sp|P27321	22.7	71.768	151580	255570	324140	123850	128550	122400	132990	143440	143710	221440	114810	114210	124210	150550	157950	118880
804	P27605	P27605	Hypoxanthine-guanine phosphoribosyltransferase	Hprt1	sp|P27605|HPRT_RAT Hypoxanthine-guanine phosphoribosyltransferase OS=Rattus norvegicus OX=10116 GN=Hprt1 PE=1 SV=1	75.7	24.477	6831300	8295200	10152000	6841400	7458100	7226400	7556400	7317000	6291400	5243500	5586100	4862900	5429300	5755600	5679500	5029800
805	P27615	P27615	Lysosome membrane protein 2	Scarb2	sp|P27615|SCRB2_RAT Lysosome membrane protein 2 OS=Rattus norvegicus OX=10116 GN=Scarb2 PE=1 SV=2	19.7	54.09	239270	269300	118560	284470	205380	264610	371820	197280	298080	522070	490000	294050	407330	475830	456870	175760
806	P27653	P27653	C-1-tetrahydrofolate synthase, cytoplasmic;Methylenetetrahydrofolate dehydrogenase;Methenyltetrahydrofolate cyclohydrolase;Formyltetrahydrofolate synthetase;C-1-tetrahydrofolate synthase, cytoplasmic, N-terminally processed	Mthfd1	sp|P27653|C1TC_RAT C-1-tetrahydrofolate synthase, cytoplasmic OS=Rattus norvegicus OX=10116 GN=Mthfd1 PE=1 SV=3	37.8	100.99	1754400	2605400	3046300	1644800	1877200	1941600	1913800	1710800	2127400	2195200	1519400	1359600	1361900	2449200	1558100	1428100
807	P27791;P27791-2	P27791;P27791-2	cAMP-dependent protein kinase catalytic subunit alpha	Prkaca	sp|P27791|KAPCA_RAT cAMP-dependent protein kinase catalytic subunit alpha OS=Rattus norvegicus OX=10116 GN=Prkaca PE=1 SV=2;sp|P27791-2|KAPCA_RAT Isoform 2 of cAMP-dependent protein kinase catalytic subunit alpha OS=Rattus norvegicus OX=10116 GN=Prkaca	41	40.619	2411200	2827900	1877000	2277900	2266900	2404900	2462800	2049000	2739800	3759400	2758100	2506500	2653300	3546000	2752000	2625600
808	P27867	P27867	Sorbitol dehydrogenase	Sord	sp|P27867|DHSO_RAT Sorbitol dehydrogenase OS=Rattus norvegicus OX=10116 GN=Sord PE=1 SV=4	36.1	38.234	870730	1237900	2046900	986530	996930	954750	987370	852630	1034700	1563600	1113100	1121000	1238000	1247000	1078100	1044400
809	P27881	P27881	Hexokinase-2	Hk2	sp|P27881|HXK2_RAT Hexokinase-2 OS=Rattus norvegicus OX=10116 GN=Hk2 PE=1 SV=1	42	102.54	2054900	2637400	3618600	1975700	1892800	2196500	1919700	2196500	3120200	1628600	1283100	873450	923420	1641600	1074200	1145500
810	P27952	P27952	40S ribosomal protein S2	Rps2	sp|P27952|RS2_RAT 40S ribosomal protein S2 OS=Rattus norvegicus OX=10116 GN=Rps2 PE=1 SV=1	49.8	31.231	2676600	2159300	1547000	2372300	2072500	2128500	2131400	2777000	2450000	2526100	2771500	2769200	2528300	2272500	2409800	2699900
811	P28023	P28023	Dynactin subunit 1	Dctn1	sp|P28023|DCTN1_RAT Dynactin subunit 1 OS=Rattus norvegicus OX=10116 GN=Dctn1 PE=1 SV=2	42.2	141.93	1397100	1783100	1616300	1407200	1283600	1437700	1644400	1280500	1426300	2126700	1516400	1366000	1495900	1748000	1676500	1369200
812	P28073	P28073	Proteasome subunit beta type-6	Psmb6	sp|P28073|PSB6_RAT Proteasome subunit beta type-6 OS=Rattus norvegicus OX=10116 GN=Psmb6 PE=1 SV=3	38.7	25.289	549060	236830	1808900	402570	397730	313990	431780	337590	629580	323190	297930	405070	380800	379920	344120	671650
813	P28075	P28075	Proteasome subunit beta type-5	Psmb5	sp|P28075|PSB5_RAT Proteasome subunit beta type-5 OS=Rattus norvegicus OX=10116 GN=Psmb5 PE=1 SV=3	47.1	28.585	400350	253970	734960	457660	348970	359170	443040	214640	650680	662930	295720	590770	338850	608950	441020	550530
814	P28480	P28480	T-complex protein 1 subunit alpha	Tcp1	sp|P28480|TCPA_RAT T-complex protein 1 subunit alpha OS=Rattus norvegicus OX=10116 GN=Tcp1 PE=1 SV=1	73.9	60.359	9003300	8778100	11083000	7736700	8193400	7953400	7652500	7540700	7947300	8957200	7974200	7706900	7802500	8631200	8011200	7844900
815	P28494	P28494	Alpha-mannosidase 2	Man2a1	sp|P28494|MA2A1_RAT Alpha-mannosidase 2 OS=Rattus norvegicus OX=10116 GN=Man2a1 PE=1 SV=2	1.1	131.24	0	0	0	0	0	0	0	0	0	0	0	0	0	0	10478	0
816	P29066	P29066	Beta-arrestin-1	Arrb1	sp|P29066|ARRB1_RAT Beta-arrestin-1 OS=Rattus norvegicus OX=10116 GN=Arrb1 PE=1 SV=1	6.9	47.019	4578400	0	0	3408700	3914900	3853800	3628500	0	3490700	0	0	2076600	1763400	0	0	0
817	P29117	P29117	Peptidyl-prolyl cis-trans isomerase F, mitochondrial	Ppif	sp|P29117|PPIF_RAT Peptidyl-prolyl cis-trans isomerase F, mitochondrial OS=Rattus norvegicus OX=10116 GN=Ppif PE=1 SV=2	63.1	21.81	3434400	4625700	6394300	3716900	4148900	4370400	4157600	3491300	4556100	4339200	4427300	3783700	4134500	4701000	4278900	3810100
818	P29147	P29147	D-beta-hydroxybutyrate dehydrogenase, mitochondrial	Bdh1	sp|P29147|BDH_RAT D-beta-hydroxybutyrate dehydrogenase, mitochondrial OS=Rattus norvegicus OX=10116 GN=Bdh1 PE=1 SV=2	44	38.201	704420	832370	333510	520880	636260	298810	701950	545670	2755500	286400	180820	124320	224260	248190	364650	230660
819	P29266	P29266	3-hydroxyisobutyrate dehydrogenase, mitochondrial	Hibadh	sp|P29266|3HIDH_RAT 3-hydroxyisobutyrate dehydrogenase, mitochondrial OS=Rattus norvegicus OX=10116 GN=Hibadh PE=1 SV=3	81.2	35.302	7451600	9170400	7479300	7578300	8411500	8523100	8939800	7363900	8897000	7582100	6974000	6216400	6737700	7737900	6449700	6912800
820	P29314	P29314	40S ribosomal protein S9	Rps9	sp|P29314|RS9_RAT 40S ribosomal protein S9 OS=Rattus norvegicus OX=10116 GN=Rps9 PE=1 SV=4	46.4	22.591	4420800	4592400	3742400	3940100	3560800	4138400	4161500	3056300	4078700	5989000	5192900	4649500	4598600	5055100	5283800	4514400
821	P29315	P29315	Ribonuclease inhibitor	Rnh1	sp|P29315|RINI_RAT Ribonuclease inhibitor OS=Rattus norvegicus OX=10116 GN=Rnh1 PE=1 SV=2	51.8	49.974	1834200	1934000	2791300	1729900	1276300	1678600	1702000	2278700	1342200	1704500	1700000	1328800	1521700	1601600	1652500	1620800
822	P29410-2;P29410	P29410-2;P29410	Adenylate kinase 2, mitochondrial;Adenylate kinase 2, mitochondrial, N-terminally processed	Ak2	sp|P29410-2|KAD2_RAT Isoform 2 of Adenylate kinase 2, mitochondrial OS=Rattus norvegicus OX=10116 GN=Ak2;sp|P29410|KAD2_RAT Adenylate kinase 2, mitochondrial OS=Rattus norvegicus OX=10116 GN=Ak2 PE=2 SV=2	71.1	25.53	3043300	2760400	3225000	3040600	3865900	2954600	2725700	2761900	3641100	3468400	3142600	3050000	2729400	2948100	3407300	2874000
823	P29411	P29411	GTP:AMP phosphotransferase AK3, mitochondrial	Ak3	sp|P29411|KAD3_RAT GTP:AMP phosphotransferase AK3, mitochondrial OS=Rattus norvegicus OX=10116 GN=Ak3 PE=2 SV=2	54.2	25.438	2258100	2374500	3073900	2142600	1922200	2056900	2196000	1895800	2184200	2646800	2459100	2351300	2840100	2623900	2182100	2451600
824	P29418	P29418	ATP synthase subunit epsilon, mitochondrial	Atp5e	sp|P29418|ATP5E_RAT ATP synthase subunit epsilon, mitochondrial OS=Rattus norvegicus OX=10116 GN=Atp5f1e PE=1 SV=2	47.1	5.7667	2269500	2609800	1246700	2270300	3114900	2306100	2459900	1351200	3796200	2266800	1849300	2189600	1554800	2881100	2062600	2213600
825	P29419	P29419	ATP synthase subunit e, mitochondrial	Atp5i	sp|P29419|ATP5I_RAT ATP synthase subunit e, mitochondrial OS=Rattus norvegicus OX=10116 GN=Atp5me PE=1 SV=3	71.8	8.2545	10652000	10861000	8909400	10561000	12934000	10227000	10044000	9290500	12390000	11549000	11364000	11697000	10856000	10670000	11436000	11220000
826	P29457	P29457	Serpin H1	Serpinh1	sp|P29457|SERPH_RAT Serpin H1 OS=Rattus norvegicus OX=10116 GN=Serpinh1 PE=1 SV=1	54.4	46.517	10880000	11094000	5027100	10063000	9582700	10138000	11771000	8941100	9405800	14576000	9405500	9322500	9459100	12310000	10709000	9816700
827	P29975	P29975	Aquaporin-1	Aqp1	sp|P29975|AQP1_RAT Aquaporin-1 OS=Rattus norvegicus OX=10116 GN=Aqp1 PE=1 SV=4	26.8	28.856	804530	1156300	1148000	823930	698110	699120	717700	935970	730600	825440	933460	982730	815310	664250	588750	734440
828	P29994-8;P29994-7;P29994-6;P29994-5;P29994-4;P29994-2;P29994-3;P29994	P29994-8;P29994-7;P29994-6;P29994-5;P29994-4;P29994-2;P29994-3;P29994	Inositol 1,4,5-trisphosphate receptor type 1	Itpr1	sp|P29994-8|ITPR1_RAT Isoform 8 of Inositol 1,4,5-trisphosphate receptor type 1 OS=Rattus norvegicus OX=10116 GN=Itpr1;sp|P29994-7|ITPR1_RAT Isoform 7 of Inositol 1,4,5-trisphosphate receptor type 1 OS=Rattus norvegicus OX=10116 GN=Itpr1;sp|P29994-6|ITPR1_	3.2	306.91	55631	67637	98517	60522	0	63722	0	51275	81090	88031	86132	0	65534	149160	123730	77842
829	P30009	P30009	Myristoylated alanine-rich C-kinase substrate	Marcks	sp|P30009|MARCS_RAT Myristoylated alanine-rich C-kinase substrate OS=Rattus norvegicus OX=10116 GN=Marcks PE=1 SV=2	44	29.794	501160	508940	605950	452870	346860	394230	571380	388440	477590	679800	420330	424900	529620	568580	479150	480170
830	P30349	P30349	Leukotriene A-4 hydrolase	Lta4h	sp|P30349|LKHA4_RAT Leukotriene A-4 hydrolase OS=Rattus norvegicus OX=10116 GN=Lta4h PE=1 SV=3	40.3	69.088	913860	1299400	1565400	1069100	902220	975230	1155500	874340	909030	1274800	923790	868750	1114200	1137600	1067800	913710
831	P30427-3;P30427-2;P30427-4;P30427	P30427-3;P30427-2;P30427-4;P30427	Plectin	Plec	sp|P30427-3|PLEC_RAT Isoform 3 of Plectin OS=Rattus norvegicus OX=10116 GN=Plec;sp|P30427-2|PLEC_RAT Isoform 2 of Plectin OS=Rattus norvegicus OX=10116 GN=Plec;sp|P30427-4|PLEC_RAT Isoform 4 of Plectin OS=Rattus norvegicus OX=10116 GN=Plec;sp|P30427|PLEC_R	57.6	517.25	24761000	28299000	37554000	23679000	25436000	23293000	24259000	22723000	20537000	24247000	19864000	17560000	19290000	18385000	20091000	17744000
832	P30713	P30713	Glutathione S-transferase theta-2	Gstt2	sp|P30713|GSTT2_RAT Glutathione S-transferase theta-2 OS=Rattus norvegicus OX=10116 GN=Gstt2 PE=1 SV=3	33.6	27.439	464310	374410	369400	536820	401480	537240	508460	605950	228050	706610	532620	550100	429920	308740	522390	601700
833	P30835	P30835	ATP-dependent 6-phosphofructokinase, liver type	Pfkl	sp|P30835|PFKAL_RAT ATP-dependent 6-phosphofructokinase, liver type OS=Rattus norvegicus OX=10116 GN=Pfkl PE=1 SV=3	32.1	85.338	511580	484270	334310	510060	430520	404290	534930	440660	697380	589950	576490	627730	550550	605950	551050	651650
834	P30839;P11883	P30839	Fatty aldehyde dehydrogenase	Aldh3a2	sp|P30839|AL3A2_RAT Aldehyde dehydrogenase family 3 member A2 OS=Rattus norvegicus OX=10116 GN=Aldh3a2 PE=1 SV=1	9.1	54.081	487170	428260	399000	361380	264160	404480	510620	241680	456660	793910	789780	603010	636510	482250	825160	521240
835	P30904	P30904	Macrophage migration inhibitory factor	Mif	sp|P30904|MIF_RAT Macrophage migration inhibitory factor OS=Rattus norvegicus OX=10116 GN=Mif PE=1 SV=4	89.6	12.477	4656900	4456800	2695800	4448100	4423600	3973400	5059100	4351700	4472300	5064900	5406700	4911000	5268000	4362400	5254400	4551600
836	P31000	P31000	Vimentin	Vim	sp|P31000|VIME_RAT Vimentin OS=Rattus norvegicus OX=10116 GN=Vim PE=1 SV=2	86.7	53.732	41426000	47525000	53906000	35383000	37972000	35650000	44791000	39987000	40129000	44345000	40702000	32840000	39537000	40348000	38237000	28452000
837	P31044	P31044	Phosphatidylethanolamine-binding protein 1;Hippocampal cholinergic neurostimulating peptide	Pebp1	sp|P31044|PEBP1_RAT Phosphatidylethanolamine-binding protein 1 OS=Rattus norvegicus OX=10116 GN=Pebp1 PE=1 SV=3	89.3	20.801	12874000	14891000	9220300	12447000	11462000	12630000	14191000	13330000	15321000	12513000	10618000	10485000	11153000	13659000	12245000	11901000
838	P31211	P31211	Corticosteroid-binding globulin	Serpina6	sp|P31211|CBG_RAT Corticosteroid-binding globulin OS=Rattus norvegicus OX=10116 GN=Serpina6 PE=1 SV=2	19.7	44.67	510540	593420	262910	539800	517460	572420	623830	522820	384900	192490	194390	215190	124210	328880	149030	343170
839	P31232	P31232	Transgelin	Tagln	sp|P31232|TAGL_RAT Transgelin OS=Rattus norvegicus OX=10116 GN=Tagln PE=1 SV=2	77.1	22.603	1847700	2301300	3605300	1734200	1704000	2021800	3080500	3071900	1865000	2325600	3717100	2608200	2392800	2125900	2307600	1876100
840	P31399	P31399	ATP synthase subunit d, mitochondrial	Atp5h	sp|P31399|ATP5H_RAT ATP synthase subunit d, mitochondrial OS=Rattus norvegicus OX=10116 GN=Atp5pd PE=1 SV=3	87.6	18.763	37210000	49137000	18268000	38566000	36027000	39641000	40665000	33829000	46172000	54120000	49360000	42242000	41434000	49480000	46852000	39426000
841	P31430	P31430	Dipeptidase 1	Dpep1	sp|P31430|DPEP1_RAT Dipeptidase 1 OS=Rattus norvegicus OX=10116 GN=Dpep1 PE=2 SV=2	5.9	45.522	0	0	0	0	0	0	0	0	0	0	0	0	0	0	96889	0
842	P31503	P31503	POU domain, class 2, transcription factor 1	Pou2f1	sp|P31503|PO2F1_RAT POU domain, class 2, transcription factor 1 (Fragment) OS=Rattus norvegicus OX=10116 GN=Pou2f1 PE=1 SV=2	2.8	65.17	0	0	0	0	0	0	0	0	0	0	0	0	0	0	0	15954
843	P31721	P31721	Complement C1q subcomponent subunit B	C1qb	sp|P31721|C1QB_RAT Complement C1q subcomponent subunit B OS=Rattus norvegicus OX=10116 GN=C1qb PE=1 SV=2	4.7	26.589	0	0	0	0	0	0	0	0	0	0	0	0	0	0	31846	0
844	P31722	P31722	Complement C1q subcomponent subunit C	C1qc	sp|P31722|C1QC_RAT Complement C1q subcomponent subunit C OS=Rattus norvegicus OX=10116 GN=C1qc PE=1 SV=2	7.3	25.686	0	0	0	0	0	0	0	0	0	0	0	0	0	0	0	20499
845	P31977	P31977	Ezrin	Ezr	sp|P31977|EZRI_RAT Ezrin OS=Rattus norvegicus OX=10116 GN=Ezr PE=1 SV=3	56.5	69.39	2366300	2873200	3840800	1948900	2160600	2299200	2407100	2182500	2120900	3660400	2877600	2333900	2817100	3252200	3062200	2430300
846	P32198	P32198	Carnitine O-palmitoyltransferase 1, liver isoform	Cpt1a	sp|P32198|CPT1A_RAT Carnitine O-palmitoyltransferase 1, liver isoform OS=Rattus norvegicus OX=10116 GN=Cpt1a PE=1 SV=2	40.6	88.124	1258000	1809300	1865700	1302900	1500400	1492100	1390800	1135400	1662500	3188600	2253300	2149900	2198700	2288600	2313400	2091700
847	P32362	P32362	Uroporphyrinogen decarboxylase	Urod	sp|P32362|DCUP_RAT Uroporphyrinogen decarboxylase (Fragment) OS=Rattus norvegicus OX=10116 GN=Urod PE=1 SV=1	21.4	40.452	466450	349800	633250	400100	283800	323540	347170	413260	351970	450060	468060	409000	434910	289580	432970	406480
848	P32551	P32551	Cytochrome b-c1 complex subunit 2, mitochondrial	Uqcrc2	sp|P32551|QCR2_RAT Cytochrome b-c1 complex subunit 2, mitochondrial OS=Rattus norvegicus OX=10116 GN=Uqcrc2 PE=1 SV=2	71	48.396	68652000	71319000	61470000	69646000	72156000	69158000	69731000	59518000	77731000	68088000	72051000	69106000	68854000	68184000	69699000	67370000
849	P33124-2;P33124	P33124-2;P33124	Long-chain-fatty-acid--CoA ligase 6	Acsl6	sp|P33124-2|ACSL6_RAT Isoform 2 of Long-chain-fatty-acid--CoA ligase 6 OS=Rattus norvegicus OX=10116 GN=Acsl6;sp|P33124|ACSL6_RAT Long-chain-fatty-acid--CoA ligase 6 OS=Rattus norvegicus OX=10116 GN=Acsl6 PE=1 SV=1	4.3	78.227	138890	206920	219610	134400	125950	135530	146170	0	145150	171490	191410	149740	166390	256410	222010	142920
850	P33436	P33436	72 kDa type IV collagenase;PEX	Mmp2	sp|P33436|MMP2_RAT 72 kDa type IV collagenase OS=Rattus norvegicus OX=10116 GN=Mmp2 PE=1 SV=2	7.6	74.149	120810	180300	319150	145120	146570	157890	162880	0	0	0	91739	0	0	0	0	142600
851	P34058	P34058	Heat shock protein HSP 90-beta	Hsp90ab1	sp|P34058|HS90B_RAT Heat shock protein HSP 90-beta OS=Rattus norvegicus OX=10116 GN=Hsp90ab1 PE=1 SV=4	71.1	83.28	54651000	49958000	38559000	50307000	50009000	51711000	50205000	46209000	45160000	42358000	44620000	41787000	43422000	41685000	45261000	46931000
852	P34064	P34064	Proteasome subunit alpha type-5	Psma5	sp|P34064|PSA5_RAT Proteasome subunit alpha type-5 OS=Rattus norvegicus OX=10116 GN=Psma5 PE=1 SV=1	37.8	26.391	1104600	1244200	2288900	1039400	913730	1045200	1302800	809250	2074600	1739100	869550	1339300	1133700	1922700	1393700	1286100
853	P34067	P34067	Proteasome subunit beta type-4	Psmb4	sp|P34067|PSB4_RAT Proteasome subunit beta type-4 OS=Rattus norvegicus OX=10116 GN=Psmb4 PE=1 SV=2	42.2	29.197	913700	1147500	2651900	1039000	899750	1158200	1159500	688630	1799800	1466600	926370	1331400	1024600	1721500	1245600	1344700
854	P34926	P34926	Microtubule-associated protein 1A;MAP1A heavy chain;MAP1 light chain LC2	Map1a	sp|P34926|MAP1A_RAT Microtubule-associated protein 1A OS=Rattus norvegicus OX=10116 GN=Map1a PE=1 SV=1	8.9	299.53	415090	527780	420130	339910	367370	353160	469850	311640	326380	437430	291570	234710	297130	415560	289980	301530
855	P35053	P35053	Glypican-1;Secreted glypican-1	Gpc1	sp|P35053|GPC1_RAT Glypican-1 OS=Rattus norvegicus OX=10116 GN=Gpc1 PE=1 SV=1	35.3	61.734	1421400	1946400	2563000	1377700	1592100	1540400	1675700	1410300	1612900	1830600	1497600	1310800	1262600	1630100	1456600	1179900
856	P35171	P35171	Cytochrome c oxidase subunit 7A2, mitochondrial	Cox7a2	sp|P35171|CX7A2_RAT Cytochrome c oxidase subunit 7A2, mitochondrial OS=Rattus norvegicus OX=10116 GN=Cox7a2 PE=1 SV=1	30.1	9.3529	7927800	8209600	6538300	7509000	7461300	7966100	9032400	5414500	9541900	8136000	9395500	9158300	8345000	9246800	8966900	9145400
857	P35213	P35213	14-3-3 protein beta/alpha;14-3-3 protein beta/alpha, N-terminally processed	Ywhab	sp|P35213|1433B_RAT 14-3-3 protein beta/alpha OS=Rattus norvegicus OX=10116 GN=Ywhab PE=1 SV=3	72.8	28.054	2689000	3174400	4412700	2547500	2449900	2612500	2769400	2541200	2745800	4042200	2874400	2632000	3104400	3775300	3200100	2828000
858	P35213-2	P35213-2	14-3-3 protein beta/alpha;14-3-3 protein beta/alpha, N-terminally processed	Ywhab	sp|P35213-2|1433B_RAT Isoform Short of 14-3-3 protein beta/alpha OS=Rattus norvegicus OX=10116 GN=Ywhab	73	27.822	0	0	0	0	0	0	0	0	0	0	0	0	0	0	0	26413
859	P35280;P70550;P62824;P35289;Q63941	P35280;P70550	Ras-related protein Rab-8A;Ras-related protein Rab-8B	Rab8a;Rab8b	sp|P35280|RAB8A_RAT Ras-related protein Rab-8A OS=Rattus norvegicus OX=10116 GN=Rab8a PE=1 SV=2;sp|P70550|RAB8B_RAT Ras-related protein Rab-8B OS=Rattus norvegicus OX=10116 GN=Rab8b PE=1 SV=1	31.9	23.668	133790	153490	0	134810	95182	147650	155750	96531	166730	202180	118570	132820	141210	158660	202070	110720
860	P35281	P35281	Ras-related protein Rab-10	Rab10	sp|P35281|RAB10_RAT Ras-related protein Rab-10 OS=Rattus norvegicus OX=10116 GN=Rab10 PE=1 SV=1	27.5	22.858	0	80258	0	0	0	75238	73900	54662	0	77702	83887	0	0	74821	65422	0
861	P35284	P35284	Ras-related protein Rab-12	Rab12	sp|P35284|RAB12_RAT Ras-related protein Rab-12 OS=Rattus norvegicus OX=10116 GN=Rab12 PE=1 SV=2	31.7	27.271	429320	406980	363630	402720	354770	392630	502550	337040	451990	584040	377270	439150	294850	496880	369940	434280
862	P35426	P35426	Cyclin-dependent kinase 4	Cdk4	sp|P35426|CDK4_RAT Cyclin-dependent kinase 4 OS=Rattus norvegicus OX=10116 GN=Cdk4 PE=1 SV=1	31.7	33.799	0	117950	0	0	0	83772	0	0	0	53345	0	0	0	48021	0	0
863	P35427	P35427	60S ribosomal protein L13a	Rpl13a	sp|P35427|RL13A_RAT 60S ribosomal protein L13a OS=Rattus norvegicus OX=10116 GN=Rpl13a PE=1 SV=2	37.9	23.476	1088200	969020	2152500	999980	966110	919530	952290	822510	1083500	1389200	1216900	1222100	1145700	1151900	1202400	1183200
864	P35433	P35433	Amidophosphoribosyltransferase	Ppat	sp|P35433|PUR1_RAT Amidophosphoribosyltransferase OS=Rattus norvegicus OX=10116 GN=Ppat PE=1 SV=1	38.7	57.436	546690	625410	901940	609500	537810	594380	591020	499930	583180	558010	343160	331380	428710	491930	460870	419060
865	P35434	P35434	ATP synthase subunit delta, mitochondrial	Atp5d	sp|P35434|ATPD_RAT ATP synthase subunit delta, mitochondrial OS=Rattus norvegicus OX=10116 GN=Atp5f1d PE=1 SV=2	53	17.595	8327900	9167000	19368000	7942100	8837400	7726300	7925500	7924500	8358200	6459600	8791800	8354000	8096600	8742700	8513000	7846700
866	P35435	P35435	ATP synthase subunit gamma, mitochondrial	Atp5c1	sp|P35435|ATPG_RAT ATP synthase subunit gamma, mitochondrial OS=Rattus norvegicus OX=10116 GN=Atp5f1c PE=1 SV=2	61.5	30.19	25758000	28912000	27733000	24085000	28339000	27461000	24660000	23941000	30953000	25767000	26937000	25426000	24174000	29217000	26713000	25161000
867	P35467	P35467	Protein S100-A1	S100a1	sp|P35467|S10A1_RAT Protein S100-A1 OS=Rattus norvegicus OX=10116 GN=S100a1 PE=1 SV=3	45.7	10.56	0	0	0	259490	0	0	146810	0	217360	0	257550	355460	290680	211080	212370	0
868	P35559	P35559	Insulin-degrading enzyme	Ide	sp|P35559|IDE_RAT Insulin-degrading enzyme OS=Rattus norvegicus OX=10116 GN=Ide PE=1 SV=1	31.7	117.71	825180	902180	726090	846340	755240	793260	901340	765230	729900	1460700	1002800	925800	1118800	990010	1088200	927720
869	P35565	P35565	Calnexin	Canx	sp|P35565|CALX_RAT Calnexin OS=Rattus norvegicus OX=10116 GN=Canx PE=1 SV=1	38.9	67.254	3214700	3265900	1475300	3196100	2908400	3276200	3026800	2859700	3033000	4830400	4634600	4089900	4324900	3589400	4383400	3959300
870	P35571	P35571	Glycerol-3-phosphate dehydrogenase, mitochondrial	Gpd2	sp|P35571|GPDM_RAT Glycerol-3-phosphate dehydrogenase, mitochondrial OS=Rattus norvegicus OX=10116 GN=Gpd2 PE=1 SV=1	28.1	80.972	1124100	903770	1608200	1002100	1040900	928780	940860	885590	1130800	1020200	1037900	979150	1001700	1085300	1008400	982530
871	P35704	P35704	Peroxiredoxin-2	Prdx2	sp|P35704|PRDX2_RAT Peroxiredoxin-2 OS=Rattus norvegicus OX=10116 GN=Prdx2 PE=1 SV=3	43.9	21.783	15053000	18352000	16802000	13670000	15298000	13129000	15565000	13394000	17247000	16411000	17493000	15533000	16010000	19461000	16835000	15129000
872	P35738	P35738	2-oxoisovalerate dehydrogenase subunit beta, mitochondrial	Bckdhb	sp|P35738|ODBB_RAT 2-oxoisovalerate dehydrogenase subunit beta, mitochondrial OS=Rattus norvegicus OX=10116 GN=Bckdhb PE=1 SV=3	40	42.823	1050800	1346200	861200	993400	1043000	1393900	1351200	1091800	1242200	1335500	1142700	796940	1089400	928910	1150400	1030600
873	P35745	P35745	Acylphosphatase-2	Acyp2	sp|P35745|ACYP2_RAT Acylphosphatase-2 OS=Rattus norvegicus OX=10116 GN=Acyp2 PE=1 SV=2	59.8	10.863	277880	319850	643400	293290	322980	356920	276860	312370	286250	123900	121490	169380	68408	119230	122840	96380
874	P35815;P35815-2	P35815;P35815-2	Protein phosphatase 1B	Ppm1b	sp|P35815|PPM1B_RAT Protein phosphatase 1B OS=Rattus norvegicus OX=10116 GN=Ppm1b PE=2 SV=1;sp|P35815-2|PPM1B_RAT Isoform 2 of Protein phosphatase 1B OS=Rattus norvegicus OX=10116 GN=Ppm1b	25.6	42.889	406560	474250	780360	387930	462200	341770	436500	405500	366820	340090	449230	357090	367510	427980	411690	409220
875	P36201	P36201	Cysteine-rich protein 2	Crip2	sp|P36201|CRIP2_RAT Cysteine-rich protein 2 OS=Rattus norvegicus OX=10116 GN=Crip2 PE=2 SV=1	66.8	22.696	11219000	13754000	23849000	11192000	10529000	11565000	11705000	12863000	7781600	8687700	9813700	7793000	8189100	12243000	9310800	9934500
876	P36202	P36202	PDZ and LIM domain protein 4	Pdlim4	sp|P36202|PDLI4_RAT PDZ and LIM domain protein 4 OS=Rattus norvegicus OX=10116 GN=Pdlim4 PE=1 SV=2	15.8	35.521	45105	59472	0	48925	33194	47208	43496	0	113790	76007	66682	48590	47253	36122	65245	50142
877	P36370	P36370	Antigen peptide transporter 1	Tap1	sp|P36370|TAP1_RAT Antigen peptide transporter 1 OS=Rattus norvegicus OX=10116 GN=Tap1 PE=1 SV=2	7	79.149	72180	118170	106830	92014	209200	121290	93464	0	173050	0	67205	61173	43705	107560	0	82838
878	P36372	P36372	Antigen peptide transporter 2	Tap2	sp|P36372|TAP2_RAT Antigen peptide transporter 2 OS=Rattus norvegicus OX=10116 GN=Tap2 PE=1 SV=1	4.8	77.712	0	0	0	0	0	0	0	0	0	0	0	0	0	0	0	17903
879	P36506	P36506	Dual specificity mitogen-activated protein kinase kinase 2	Map2k2	sp|P36506|MP2K2_RAT Dual specificity mitogen-activated protein kinase kinase 2 OS=Rattus norvegicus OX=10116 GN=Map2k2 PE=1 SV=1	30	44.281	155570	176390	273940	166050	124310	150900	183800	114590	150280	186470	165180	137090	157530	186420	158780	128430
880	P36860	P36860	Ras-related protein Ral-B	Ralb	sp|P36860|RALB_RAT Ras-related protein Ral-B OS=Rattus norvegicus OX=10116 GN=Ralb PE=2 SV=1	43.2	23.317	43380	75448	77611	62484	56295	50412	61197	41072	117090	164000	61357	0	83558	97849	80171	67159
881	P36876;P36877;P36877-2;P97888	P36876	Serine/threonine-protein phosphatase 2A 55 kDa regulatory subunit B alpha isoform	Ppp2r2a	sp|P36876|2ABA_RAT Serine/threonine-protein phosphatase 2A 55 kDa regulatory subunit B alpha isoform OS=Rattus norvegicus OX=10116 GN=Ppp2r2a PE=2 SV=1	41.6	51.677	1166200	1320300	769460	1189500	1312200	1276400	1142000	947080	1288900	1147300	1272200	1026900	1137000	1155600	1193300	1095400
882	P36953;CON__REFSEQ:XP_585019	P36953	Afamin	Afm	sp|P36953|AFAM_RAT Afamin OS=Rattus norvegicus OX=10116 GN=Afm PE=3 SV=1	39.5	69.335	1528700	1946600	3075300	1222300	1234900	1403000	1447400	1516400	1465300	1352300	1098700	739370	1005400	1465900	869990	974820
883	P36970-2;P36970;P36970-3	P36970-2;P36970;P36970-3	Phospholipid hydroperoxide glutathione peroxidase, mitochondrial	Gpx4	sp|P36970-2|GPX4_RAT Isoform Cytoplasmic of Phospholipid hydroperoxide glutathione peroxidase OS=Rattus norvegicus OX=10116 GN=Gpx4;sp|P36970|GPX4_RAT Phospholipid hydroperoxide glutathione peroxidase OS=Rattus norvegicus OX=10116 GN=Gpx4 PE=1 SV=3;sp|P369	32.9	19.49	704370	991650	300180	711640	710100	881000	640420	471020	815010	801440	724460	566390	729290	508250	700250	507720
884	P36972	P36972	Adenine phosphoribosyltransferase	Aprt	sp|P36972|APT_RAT Adenine phosphoribosyltransferase OS=Rattus norvegicus OX=10116 GN=Aprt PE=1 SV=1	90	19.546	4609900	4483400	2532800	4939200	3866700	5496100	4988600	4574100	5083200	4313000	4821800	4697900	5005900	3606200	4547500	4604400
885	P37199	P37199	Nuclear pore complex protein Nup155	Nup155	sp|P37199|NU155_RAT Nuclear pore complex protein Nup155 OS=Rattus norvegicus OX=10116 GN=Nup155 PE=1 SV=1	14.9	155	313010	425660	166040	307350	307240	315280	367810	260920	379900	506670	338340	344510	387120	469260	394560	344250
886	P37285-2;P37285-3;P37285	P37285-2;P37285-3;P37285	Kinesin light chain 1	Klc1	sp|P37285-2|KLC1_RAT Isoform A of Kinesin light chain 1 OS=Rattus norvegicus OX=10116 GN=Klc1;sp|P37285-3|KLC1_RAT Isoform B of Kinesin light chain 1 OS=Rattus norvegicus OX=10116 GN=Klc1;sp|P37285|KLC1_RAT Kinesin light chain 1 OS=Rattus norvegicus OX=101	19.2	61.64	726170	760180	1056600	579850	441520	559240	661640	621380	538240	701590	772780	513570	705350	621270	671710	513410
887	P37397	P37397	Calponin-3	Cnn3	sp|P37397|CNN3_RAT Calponin-3 OS=Rattus norvegicus OX=10116 GN=Cnn3 PE=1 SV=1	47	36.434	701600	413300	1037300	658790	711140	380900	464060	867310	493210	342390	406360	343950	477800	618900	555430	377240
888	P37996	P37996	ADP-ribosylation factor-like protein 3	Arl3	sp|P37996|ARL3_RAT ADP-ribosylation factor-like protein 3 OS=Rattus norvegicus OX=10116 GN=Arl3 PE=1 SV=2	53.3	20.456	289890	299420	258780	250940	225120	256830	291320	243200	283620	330400	284350	280070	348400	279860	303330	321500
889	P38062	P38062	Methionine aminopeptidase 2	Metap2	sp|P38062|MAP2_RAT Methionine aminopeptidase 2 OS=Rattus norvegicus OX=10116 GN=Metap2 PE=1 SV=2	39.1	53.051	1355000	1655800	1316800	1149300	1232000	1262800	1240500	1249100	1259400	2130300	1388600	1227000	1327300	1685500	1440500	1287900
890	P38650	P38650	Cytoplasmic dynein 1 heavy chain 1	Dync1h1	sp|P38650|DYHC1_RAT Cytoplasmic dynein 1 heavy chain 1 OS=Rattus norvegicus OX=10116 GN=Dync1h1 PE=1 SV=1	31.8	532.25	5973900	5699700	5885600	5373800	4616200	5839200	4983000	4173600	7122500	10472000	8095400	7485900	8207500	7584600	7891900	6994800
891	P38652	P38652	Phosphoglucomutase-1	Pgm1	sp|P38652|PGM1_RAT Phosphoglucomutase-1 OS=Rattus norvegicus OX=10116 GN=Pgm1 PE=1 SV=2	81	61.402	13837000	18041000	15760000	14232000	12474000	14601000	15391000	13517000	12770000	16343000	13913000	11735000	13750000	14350000	14101000	12906000
892	P38656	P38656	Lupus La protein homolog	Ssb	sp|P38656|LA_RAT Lupus La protein homolog OS=Rattus norvegicus OX=10116 GN=Ssb PE=1 SV=1	41.2	47.777	602060	549510	700820	515970	492550	565330	532720	686750	496200	1004600	723230	664080	701670	758770	812210	617160
893	P38659	P38659	Protein disulfide-isomerase A4	Pdia4	sp|P38659|PDIA4_RAT Protein disulfide-isomerase A4 OS=Rattus norvegicus OX=10116 GN=Pdia4 PE=1 SV=2	32.8	72.719	940870	1187200	1713800	928410	951270	940930	1066200	869680	997850	1151300	1117800	906150	1125000	1071100	1128200	890150
894	P38718;P38718-2	P38718;P38718-2	Mitochondrial pyruvate carrier 2	Mpc2	sp|P38718|MPC2_RAT Mitochondrial pyruvate carrier 2 OS=Rattus norvegicus OX=10116 GN=Mpc2 PE=2 SV=1;sp|P38718-2|MPC2_RAT Isoform Short of Mitochondrial pyruvate carrier 2 OS=Rattus norvegicus OX=10116 GN=Mpc2	53.5	14.258	3007200	2850500	644100	3210100	2480500	2780000	3140600	1986400	3897800	3454900	3434000	3127100	2981800	3150500	3348300	3020400
895	P38983	P38983	40S ribosomal protein SA	Rpsa	sp|P38983|RSSA_RAT 40S ribosomal protein SA OS=Rattus norvegicus OX=10116 GN=Rpsa PE=1 SV=3	59.3	32.824	10298000	10327000	9662600	9658400	8204600	10252000	9498300	8571600	9760500	12135000	10269000	10954000	10730000	10742000	10936000	10431000
896	P39032	P39032	60S ribosomal protein L36	Rpl36	sp|P39032|RL36_RAT 60S ribosomal protein L36 OS=Rattus norvegicus OX=10116 GN=Rpl36 PE=1 SV=2	23.8	12.268	332280	257890	0	302050	428620	350070	331120	321090	299080	244620	657740	387360	441950	281420	413470	332950
897	P39052-3;P39052	P39052-3;P39052	Dynamin-2	Dnm2	sp|P39052-3|DYN2_RAT Isoform 3 of Dynamin-2 OS=Rattus norvegicus OX=10116 GN=Dnm2;sp|P39052|DYN2_RAT Dynamin-2 OS=Rattus norvegicus OX=10116 GN=Dnm2 PE=1 SV=1	43.1	97.817	1742800	1975700	2363300	1898000	1909200	1875400	1877700	1806400	1759300	2352300	2094300	1927300	2049800	1856100	2120300	1852000
898	P39052-4;P39052-2	P39052-4;P39052-2	Dynamin-2	Dnm2	sp|P39052-4|DYN2_RAT Isoform 4 of Dynamin-2 OS=Rattus norvegicus OX=10116 GN=Dnm2;sp|P39052-2|DYN2_RAT Isoform 2 of Dynamin-2 OS=Rattus norvegicus OX=10116 GN=Dnm2	40.9	97.746	0	0	0	0	0	0	0	0	101310	48865	19137	0	0	44614	0	0
899	P39069	P39069	Adenylate kinase isoenzyme 1	Ak1	sp|P39069|KAD1_RAT Adenylate kinase isoenzyme 1 OS=Rattus norvegicus OX=10116 GN=Ak1 PE=1 SV=3	85.1	21.584	15294000	15616000	14361000	17982000	18740000	17963000	17933000	17956000	13382000	10940000	15330000	13927000	14886000	12417000	13742000	14759000
900	P40112	P40112	Proteasome subunit beta type-3	Psmb3	sp|P40112|PSB3_RAT Proteasome subunit beta type-3 OS=Rattus norvegicus OX=10116 GN=Psmb3 PE=1 SV=1	35.1	22.965	519350	503570	1782900	551970	431790	567810	645420	336040	1264200	933080	430250	839040	696020	1143100	893050	755120
901	P40190	P40190	Interleukin-6 receptor subunit beta	Il6st	sp|P40190|IL6RB_RAT Interleukin-6 receptor subunit beta OS=Rattus norvegicus OX=10116 GN=Il6st PE=1 SV=1	4.1	102.45	0	0	0	0	0	0	0	42622	0	45459	0	50740	0	41014	0	0
902	P40241	P40241	CD9 antigen	Cd9	sp|P40241|CD9_RAT CD9 antigen OS=Rattus norvegicus OX=10116 GN=Cd9 PE=1 SV=2	26.5	25.215	94498	146920	68231	128460	63766	0	108090	269000	175730	248590	195570	162230	175070	281300	228390	219370
903	P40307	P40307	Proteasome subunit beta type-2	Psmb2	sp|P40307|PSB2_RAT Proteasome subunit beta type-2 OS=Rattus norvegicus OX=10116 GN=Psmb2 PE=1 SV=1	56.7	22.912	319080	200300	627750	360110	370220	335650	377880	301400	658150	590240	359040	481150	363500	705610	539850	456410
904	P40329	P40329	Arginine--tRNA ligase, cytoplasmic	Rars	sp|P40329|SYRC_RAT Arginine--tRNA ligase, cytoplasmic OS=Rattus norvegicus OX=10116 GN=Rars1 PE=1 SV=2	48.6	75.81	2663600	2437700	3197800	2409000	2437600	2638400	2509800	2567600	2087200	2218600	2594500	2476600	2426900	1862200	2623700	2366600
905	P40615	P40615	H/ACA ribonucleoprotein complex subunit 4	Dkc1	sp|P40615|DKC1_RAT H/ACA ribonucleoprotein complex subunit DKC1 OS=Rattus norvegicus OX=10116 GN=Dkc1 PE=1 SV=4	17.1	56.614	208580	238360	406390	185270	141990	230630	230360	188080	224880	343730	243710	257140	312530	252760	296840	214340
906	P41123	P41123	60S ribosomal protein L13	Rpl13	sp|P41123|RL13_RAT 60S ribosomal protein L13 OS=Rattus norvegicus OX=10116 GN=Rpl13 PE=1 SV=2	51.2	24.309	2857900	3142900	3246300	2348300	2510000	2579600	2424700	2305800	2057700	4001600	3514500	2999100	2708600	2832300	3230500	2875100
907	P41350	P41350	Caveolin-1	Cav1	sp|P41350|CAV1_RAT Caveolin-1 OS=Rattus norvegicus OX=10116 GN=Cav1 PE=1 SV=3	45.5	20.552	1545500	2455600	2616900	1535800	1771100	1563400	1506200	1659100	1957700	3043200	1489300	1606400	1396700	2516000	1706000	1261500
908	P41350-2	P41350-2	Caveolin-1	Cav1	sp|P41350-2|CAV1_RAT Isoform 2 of Caveolin-1 OS=Rattus norvegicus OX=10116 GN=Cav1	36.7	17.104	0	0	0	0	0	0	0	0	0	0	0	0	0	0	0	10122
909	P41498;P41498-2	P41498	Low molecular weight phosphotyrosine protein phosphatase	Acp1	sp|P41498|PPAC_RAT Low molecular weight phosphotyrosine protein phosphatase OS=Rattus norvegicus OX=10116 GN=Acp1 PE=1 SV=3	41.8	18.151	372640	468550	752020	402900	334970	422260	393450	354980	448760	476800	423710	321740	394090	355020	403140	369040
910	P41499-1;P41499	P41499-1;P41499	Tyrosine-protein phosphatase non-receptor type 11	Ptpn11	sp|P41499-1|PTN11_RAT Isoform 2 of Tyrosine-protein phosphatase non-receptor type 11 OS=Rattus norvegicus OX=10116 GN=Ptpn11;sp|P41499|PTN11_RAT Tyrosine-protein phosphatase non-receptor type 11 OS=Rattus norvegicus OX=10116 GN=Ptpn11 PE=1 SV=5	46.2	68.458	1289400	1734100	2365800	1319800	1356600	1444700	1348100	1298000	1114100	1626000	1291700	1014800	1219000	1354500	1271000	1105000
911	P41516	P41516	DNA topoisomerase 2-alpha	Top2a	sp|P41516|TOP2A_RAT DNA topoisomerase 2-alpha OS=Rattus norvegicus OX=10116 GN=Top2a PE=1 SV=1	4.5	173.22	734720	823480	514080	589710	603420	733690	564760	516000	606290	1189400	1041200	995760	1052600	992890	1287500	865940
912	P41542	P41542	General vesicular transport factor p115	Uso1	sp|P41542|USO1_RAT General vesicular transport factor p115 OS=Rattus norvegicus OX=10116 GN=Uso1 PE=1 SV=1	38.4	107.16	1123900	1342300	1460500	1180400	1000400	1133800	1170400	1114400	960020	1269400	1214100	1138300	1264600	1198800	1264800	1142100
913	P41562	P41562	Isocitrate dehydrogenase [NADP] cytoplasmic	Idh1	sp|P41562|IDHC_RAT Isocitrate dehydrogenase [NADP] cytoplasmic OS=Rattus norvegicus OX=10116 GN=Idh1 PE=1 SV=1	59.7	46.734	2381000	2178300	3996300	2686700	2656600	2620200	2210100	2520700	2140900	1365000	2156900	2056800	2200900	1726600	1733800	1832800
914	P41565	P41565	Isocitrate dehydrogenase [NAD] subunit gamma 1, mitochondrial	Idh3g	sp|P41565|IDHG1_RAT Isocitrate dehydrogenase [NAD] subunit gamma 1, mitochondrial OS=Rattus norvegicus OX=10116 GN=Idh3g PE=1 SV=2	46.6	42.851	8146500	8010300	5364300	7638700	7585200	8123000	7794700	7058200	6922900	9043800	8299100	7297800	7551300	7711000	7900500	7707300
915	P41777	P41777	Nucleolar and coiled-body phosphoprotein 1	Nolc1	sp|P41777|NOLC1_RAT Nucleolar and coiled-body phosphoprotein 1 OS=Rattus norvegicus OX=10116 GN=Nolc1 PE=1 SV=2	7	73.563	349170	90664	113270	323180	263560	363270	279120	280980	134690	67087	224560	353220	304680	86903	145430	241260
916	P42123	P42123	L-lactate dehydrogenase B chain	Ldhb	sp|P42123|LDHB_RAT L-lactate dehydrogenase B chain OS=Rattus norvegicus OX=10116 GN=Ldhb PE=1 SV=2	80.2	36.612	83021000	76723000	62007000	79464000	96792000	82018000	80779000	88350000	75186000	44186000	77897000	71346000	66714000	67049000	66460000	75291000
917	P42264-2;P42264	P42264-2;P42264	Glutamate receptor ionotropic, kainate 3	Grik3	sp|P42264-2|GRIK3_RAT Isoform GluR7B of Glutamate receptor ionotropic, kainate 3 OS=Rattus norvegicus OX=10116 GN=Grik3;sp|P42264|GRIK3_RAT Glutamate receptor ionotropic, kainate 3 OS=Rattus norvegicus OX=10116 GN=Grik3 PE=1 SV=1	1.5	103.11	0	0	0	0	0	0	0	0	0	0	0	0	0	0	0	3450.8
918	P42346	P42346	Serine/threonine-protein kinase mTOR	Mtor	sp|P42346|MTOR_RAT Serine/threonine-protein kinase mTOR OS=Rattus norvegicus OX=10116 GN=Mtor PE=1 SV=1	1.8	288.79	0	0	0	0	0	0	0	0	0	0	0	0	0	2628300	0	0
919	P42667	P42667	Signal peptidase complex catalytic subunit SEC11A	Sec11a	sp|P42667|SC11A_RAT Signal peptidase complex catalytic subunit SEC11A OS=Rattus norvegicus OX=10116 GN=Sec11a PE=2 SV=1	23.5	20.599	186820	181140	122830	223690	197490	236900	191730	206520	304710	94177	321950	392490	399060	163110	354810	296850
920	P42676	P42676	Neurolysin, mitochondrial	Nln	sp|P42676|NEUL_RAT Neurolysin, mitochondrial OS=Rattus norvegicus OX=10116 GN=Nln PE=1 SV=1	17.8	80.253	199520	322180	173720	254290	216070	241520	290550	238090	243710	466010	244570	262440	314730	269390	305740	239030
921	P42893-3;P42893;P42893-2	P42893-3;P42893;P42893-2	Endothelin-converting enzyme 1	Ece1	sp|P42893-3|ECE1_RAT Isoform C of Endothelin-converting enzyme 1 OS=Rattus norvegicus OX=10116 GN=Ece1;sp|P42893|ECE1_RAT Endothelin-converting enzyme 1 OS=Rattus norvegicus OX=10116 GN=Ece1 PE=1 SV=2;sp|P42893-2|ECE1_RAT Isoform B of Endothelin-converting	6.6	85.519	0	0	0	0	0	0	0	81805	0	0	0	0	0	0	0	0
922	P42930	P42930	Heat shock protein beta-1	Hspb1	sp|P42930|HSPB1_RAT Heat shock protein beta-1 OS=Rattus norvegicus OX=10116 GN=Hspb1 PE=1 SV=1	63.1	22.892	19259000	20957000	40959000	16342000	16691000	16525000	19226000	20898000	19718000	26515000	21096000	19178000	22294000	22847000	21967000	21168000
923	P43138	P43138	DNA-(apurinic or apyrimidinic site) lyase;DNA-(apurinic or apyrimidinic site) lyase, mitochondrial	Apex1	sp|P43138|APEX1_RAT DNA-(apurinic or apyrimidinic site) endonuclease OS=Rattus norvegicus OX=10116 GN=Apex1 PE=1 SV=2	41.3	35.538	373850	481880	354330	446570	282020	378310	403190	396360	351190	832090	570280	501140	646530	668320	601590	511430
924	P43244	P43244	Matrin-3	Matr3	sp|P43244|MATR3_RAT Matrin-3 OS=Rattus norvegicus OX=10116 GN=Matr3 PE=1 SV=2	35.1	94.446	2985600	3374600	1369500	2881700	2641100	3110200	2986700	2488800	2585600	4370300	3654000	3253600	3594300	3521900	4334300	3098500
925	P43278	P43278	Histone H1.0;Histone H1.0, N-terminally processed	H1f0	sp|P43278|H10_RAT Histone H1.0 OS=Rattus norvegicus OX=10116 GN=H1-0 PE=2 SV=2	30.4	20.885	1032400	1012300	1333500	916470	1110000	1158800	928840	921430	1385300	2046700	1556500	1512700	1523400	1411100	1572700	1401000
926	P43424	P43424	Galactose-1-phosphate uridylyltransferase	Galt	sp|P43424|GALT_RAT Galactose-1-phosphate uridylyltransferase OS=Rattus norvegicus OX=10116 GN=Galt PE=2 SV=1	20.3	43.314	142700	134740	97901	147480	158830	148530	111330	200220	142750	103160	146840	190050	163130	153010	135290	116520
927	P45479	P45479	Palmitoyl-protein thioesterase 1	Ppt1	sp|P45479|PPT1_RAT Palmitoyl-protein thioesterase 1 OS=Rattus norvegicus OX=10116 GN=Ppt1 PE=1 SV=1	10.8	34.455	0	0	0	0	0	0	0	0	0	0	0	0	0	0	122870	0
928	P45592	P45592	Cofilin-1	Cfl1	sp|P45592|COF1_RAT Cofilin-1 OS=Rattus norvegicus OX=10116 GN=Cfl1 PE=1 SV=3	80.1	18.532	7681700	5658200	12356000	7189800	9189200	6886100	6116200	8917800	7420900	5213300	4799000	5430000	5260200	5018700	5389600	6197500
929	P45953	P45953	Very long-chain specific acyl-CoA dehydrogenase, mitochondrial	Acadvl	sp|P45953|ACADV_RAT Very long-chain specific acyl-CoA dehydrogenase, mitochondrial OS=Rattus norvegicus OX=10116 GN=Acadvl PE=1 SV=1	73	70.748	55510000	66146000	50477000	57288000	49925000	56209000	53249000	56218000	49681000	68173000	68846000	63887000	60327000	62564000	59987000	61672000
930	P46152;P46153	P46152	Transcription factor GATA-4	Gata4	sp|P46152|GATA4_RAT Transcription factor GATA-4 OS=Rattus norvegicus OX=10116 GN=Gata4 PE=1 SV=1	16.8	44.597	68070	93819	65977	67943	41386	54329	81122	51215	57545	118070	82784	73497	127020	62083	113670	99875
931	P46413	P46413	Glutathione synthetase	Gss	sp|P46413|GSHB_RAT Glutathione synthetase OS=Rattus norvegicus OX=10116 GN=Gss PE=1 SV=1	15.2	52.344	101500	129560	100880	221590	128990	192220	204160	238220	212770	78323	166320	258050	0	212320	0	281480
932	P46462	P46462	Transitional endoplasmic reticulum ATPase	Vcp	sp|P46462|TERA_RAT Transitional endoplasmic reticulum ATPase OS=Rattus norvegicus OX=10116 GN=Vcp PE=1 SV=3	85.5	89.348	20515000	22047000	18461000	21208000	21850000	20659000	21358000	20498000	19176000	22172000	21857000	20411000	21491000	22289000	21570000	21900000
933	P46844	P46844	Biliverdin reductase A	Blvra	sp|P46844|BIEA_RAT Biliverdin reductase A OS=Rattus norvegicus OX=10116 GN=Blvra PE=1 SV=1	41.4	33.565	477530	366410	0	528910	604810	525110	441380	577790	287840	168320	390720	431630	402170	141430	319170	415260
934	P46933-2;P46933	P46933-2;P46933	Amyloid beta A4 precursor protein-binding family B member 1	Apbb1	sp|P46933-2|APBB1_RAT Isoform 2 of Amyloid-beta A4 precursor protein-binding family B member 1 OS=Rattus norvegicus OX=10116 GN=Apbb1;sp|P46933|APBB1_RAT Amyloid-beta A4 precursor protein-binding family B member 1 OS=Rattus norvegicus OX=10116 GN=Apbb1 PE=	11.1	77.37	1194000	1656700	995160	1573700	1806900	1368300	1331300	1005700	1717900	2073900	1980700	1842100	1722200	1701800	1415800	1432000
935	P47196;Q63484	P47196	RAC-alpha serine/threonine-protein kinase	Akt1	sp|P47196|AKT1_RAT RAC-alpha serine/threonine-protein kinase OS=Rattus norvegicus OX=10116 GN=Akt1 PE=1 SV=1	27.3	55.735	645900	764120	367980	617580	651240	615450	636920	538770	659180	1128400	579790	749910	688960	838080	669580	645570
936	P47197	P47197	RAC-beta serine/threonine-protein kinase	Akt2	sp|P47197|AKT2_RAT RAC-beta serine/threonine-protein kinase OS=Rattus norvegicus OX=10116 GN=Akt2 PE=1 SV=1	16.2	55.543	128050	162790	110410	129420	90066	114710	113160	100860	110710	214780	93822	79727	85904	126170	114200	90019
937	P47198	P47198	60S ribosomal protein L22	Rpl22	sp|P47198|RL22_RAT 60S ribosomal protein L22 OS=Rattus norvegicus OX=10116 GN=Rpl22 PE=2 SV=2	58.6	14.789	1085100	1321100	2554200	1120400	1400500	1249400	1008200	1036200	1330100	1088400	1194700	1114200	1065800	1418100	1123900	1123200
938	P47245;P47245-2	P47245;P47245-2	Nardilysin	Nrd1	sp|P47245|NRDC_RAT Nardilysin OS=Rattus norvegicus OX=10116 GN=Nrdc PE=1 SV=1;sp|P47245-2|NRDC_RAT Isoform 2 of Nardilysin OS=Rattus norvegicus OX=10116 GN=Nrdc	18.2	132.97	585890	669310	1109800	655860	586830	654530	583050	701410	593220	749300	610430	543120	687040	656890	642010	574860
939	P47727	P47727	Carbonyl reductase [NADPH] 1	Cbr1	sp|P47727|CBR1_RAT Carbonyl reductase [NADPH] 1 OS=Rattus norvegicus OX=10116 GN=Cbr1 PE=1 SV=2	81.6	30.578	6123800	5681400	6719100	6489600	5119800	6141000	5590700	5066400	6741500	14348000	12091000	12661000	15704000	11286000	14037000	10751000
940	P47752	P47752	Sphingosine 1-phosphate receptor 2	S1pr2	sp|P47752|S1PR2_RAT Sphingosine 1-phosphate receptor 2 OS=Rattus norvegicus OX=10116 GN=S1pr2 PE=1 SV=1	4.8	38.734	0	0	0	0	0	0	0	0	0	0	0	0	0	0	27211	0
941	P47816	P47816	Programmed cell death protein 2	Pdcd2	sp|P47816|PDCD2_RAT Programmed cell death protein 2 OS=Rattus norvegicus OX=10116 GN=Pdcd2 PE=2 SV=2	5.8	38.444	0	0	0	0	0	0	0	0	0	0	0	0	0	0	0	21078
942	P47853	P47853	Biglycan	Bgn	sp|P47853|PGS1_RAT Biglycan OS=Rattus norvegicus OX=10116 GN=Bgn PE=1 SV=1	45.8	41.706	1478200	2057000	1673900	1227800	975400	1077100	2470600	2144800	1410700	3512100	2457900	1798200	2266100	2319400	2279300	1381600
943	P47858	P47858	ATP-dependent 6-phosphofructokinase, muscle type	Pfkm	sp|P47858|PFKAM_RAT ATP-dependent 6-phosphofructokinase, muscle type OS=Rattus norvegicus OX=10116 GN=Pfkm PE=1 SV=3	41.4	85.559	8590400	8474900	3878100	9600200	9247300	9323800	8968300	8328200	9748500	8571100	8941000	8623700	8000100	9231300	8841600	9410600
944	P47860	P47860	ATP-dependent 6-phosphofructokinase, platelet type	Pfkp	sp|P47860|PFKAP_RAT ATP-dependent 6-phosphofructokinase, platelet type OS=Rattus norvegicus OX=10116 GN=Pfkp PE=1 SV=2	46.7	85.719	1372900	1198000	1060100	1125300	1177500	1217300	1293500	1150000	1671200	2179400	2089900	1959900	1998000	1816800	2114300	1948900
945	P47875	P47875	Cysteine and glycine-rich protein 1	Csrp1	sp|P47875|CSRP1_RAT Cysteine and glycine-rich protein 1 OS=Rattus norvegicus OX=10116 GN=Csrp1 PE=1 SV=2	36.8	20.613	430340	342140	939120	341380	337170	411930	467930	575840	339320	496150	491450	427220	421840	311480	424560	327380
946	P47942	P47942	Dihydropyrimidinase-related protein 2	Dpysl2	sp|P47942|DPYL2_RAT Dihydropyrimidinase-related protein 2 OS=Rattus norvegicus OX=10116 GN=Dpysl2 PE=1 SV=1	65.2	62.277	5765500	6838300	9661000	5947500	6038900	5844600	6489500	6231700	5847000	6360600	6698300	6016900	6667100	6048600	6541600	6167900
947	P47967	P47967	Galectin-5	Lgals5	sp|P47967|LEG5_RAT Galectin-5 OS=Rattus norvegicus OX=10116 GN=Lgals5 PE=1 SV=2	56.6	16.196	0	0	0	43812	0	0	0	23803	171000	336930	190500	210210	390520	0	215870	312500
948	P48004-2;P48004	P48004-2;P48004	Proteasome subunit alpha type-7	Psma7	sp|P48004-2|PSA7_RAT Isoform RC6-IS of Proteasome subunit alpha type-7 OS=Rattus norvegicus OX=10116 GN=Psma7;sp|P48004|PSA7_RAT Proteasome subunit alpha type-7 OS=Rattus norvegicus OX=10116 GN=Psma7 PE=1 SV=1	58.5	27.783	491220	260900	425030	505900	578180	498080	580540	361320	950220	782480	378190	765360	444250	765700	682840	696280
949	P48037	P48037	Annexin A6	Anxa6	sp|P48037|ANXA6_RAT Annexin A6 OS=Rattus norvegicus OX=10116 GN=Anxa6 PE=1 SV=2	80.7	75.753	25712000	25569000	17050000	22133000	21800000	20084000	20708000	22973000	28993000	31181000	30077000	26882000	26900000	30799000	29298000	25743000
950	P48199	P48199	C-reactive protein	Crp	sp|P48199|CRP_RAT C-reactive protein OS=Rattus norvegicus OX=10116 GN=Crp PE=1 SV=1	18.3	25.468	797840	583340	0	715980	0	532040	627760	437370	1157900	0	0	0	0	0	0	0
951	P48284	P48284	Carbonic anhydrase 4	Ca4	sp|P48284|CAH4_RAT Carbonic anhydrase 4 OS=Rattus norvegicus OX=10116 GN=Ca4 PE=1 SV=1	12.9	35.076	242920	400060	217500	255590	335330	419800	382480	193060	144880	154960	119830	175330	148510	141490	107000	182000
952	P48500	P48500	Triosephosphate isomerase	Tpi1	sp|P48500|TPIS_RAT Triosephosphate isomerase OS=Rattus norvegicus OX=10116 GN=Tpi1 PE=1 SV=2	94	26.849	40100000	46679000	37406000	45104000	43220000	44779000	42866000	46246000	41446000	38321000	45158000	36244000	47308000	34545000	44777000	36344000
953	P48508	P48508	Glutamate--cysteine ligase regulatory subunit	Gclm	sp|P48508|GSH0_RAT Glutamate--cysteine ligase regulatory subunit OS=Rattus norvegicus OX=10116 GN=Gclm PE=1 SV=1	17.2	30.548	180240	221520	176430	201330	142890	174660	188250	199410	190510	245030	184050	137870	169690	176550	234000	156510
954	P48675;P23565;P12839	P48675	Desmin	Des	sp|P48675|DESM_RAT Desmin OS=Rattus norvegicus OX=10116 GN=Des PE=1 SV=2	87.4	53.456	74060000	68279000	83373000	70633000	85206000	70222000	64194000	70784000	72007000	67087000	71698000	69434000	67887000	62524000	70586000	73567000
955	P48679	P48679	Prelamin-A/C;Lamin-A/C	Lmna	sp|P48679|LMNA_RAT Prelamin-A/C OS=Rattus norvegicus OX=10116 GN=Lmna PE=1 SV=1	72.2	74.323	14459000	18248000	29056000	15211000	14889000	14582000	16332000	15643000	15457000	21061000	19121000	16401000	17467000	19330000	19693000	15566000
956	P48721	P48721	Stress-70 protein, mitochondrial	Hspa9	sp|P48721|GRP75_RAT Stress-70 protein, mitochondrial OS=Rattus norvegicus OX=10116 GN=Hspa9 PE=1 SV=3	76	73.857	36213000	44251000	51208000	34800000	37271000	41357000	38674000	33736000	42451000	52818000	40044000	37367000	41847000	47407000	40807000	37533000
957	P49134	P49134	Integrin beta-1	Itgb1	sp|P49134|ITB1_RAT Integrin beta-1 OS=Rattus norvegicus OX=10116 GN=Itgb1 PE=2 SV=1	37.4	88.494	4038700	4086000	5602500	3756400	3578200	3753500	3621500	3747300	3745800	4641400	4676500	4419100	4814300	3535500	4386500	4240200
958	P49186-2;P49186;P49187-2;P49187;Q9WTY9;P49185	P49186-2;P49186	Mitogen-activated protein kinase 9	Mapk9	sp|P49186-2|MK09_RAT Isoform Alpha-1 of Mitogen-activated protein kinase 9 OS=Rattus norvegicus OX=10116 GN=Mapk9;sp|P49186|MK09_RAT Mitogen-activated protein kinase 9 OS=Rattus norvegicus OX=10116 GN=Mapk9 PE=1 SV=1	17.3	48.107	68189	128740	26179	35813	0	0	69254	0	0	91577	47375	102970	73297	0	0	0
959	P49242	P49242	40S ribosomal protein S3a;40S ribosomal protein S3b	Rps3a	sp|P49242|RS3A_RAT 40S ribosomal protein S3a OS=Rattus norvegicus OX=10116 GN=Rps3a PE=1 SV=2	59.5	29.945	3705400	4092700	4872300	3463200	3113900	3775700	3231900	3127600	3712700	5308800	3880700	3642700	3846600	3833800	4228700	3550900
960	P49432	P49432	Pyruvate dehydrogenase E1 component subunit beta, mitochondrial	Pdhb	sp|P49432|ODPB_RAT Pyruvate dehydrogenase E1 component subunit beta, mitochondrial OS=Rattus norvegicus OX=10116 GN=Pdhb PE=1 SV=2	58.5	38.982	34846000	35231000	34929000	34823000	38221000	37240000	36478000	31678000	40183000	32926000	36775000	36983000	36097000	34362000	32099000	35039000
961	P49744	P49744	Thrombospondin-4	Thbs4	sp|P49744|TSP4_RAT Thrombospondin-4 OS=Rattus norvegicus OX=10116 GN=Thbs4 PE=1 SV=1	5.6	108.21	108230	103800	513220	100120	0	0	152770	134550	93214	156990	0	92237	172330	107000	97155	0
962	P49791	P49791	Nuclear pore complex protein Nup153	Nup153	sp|P49791|NU153_RAT Nuclear pore complex protein Nup153 OS=Rattus norvegicus OX=10116 GN=Nup153 PE=1 SV=1	1.5	152.82	0	0	0	0	0	0	0	0	0	0	0	0	0	111070	24000	0
963	P49793;P49793-2	P49793	Nuclear pore complex protein Nup98-Nup96;Nuclear pore complex protein Nup98;Nuclear pore complex protein Nup96	Nup98	sp|P49793|NUP98_RAT Nuclear pore complex protein Nup98-Nup96 OS=Rattus norvegicus OX=10116 GN=Nup98 PE=1 SV=2	7.6	197.28	0	0	113010	74723	0	77624	75408	0	98301	271080	155440	120800	136460	128590	163480	82314
964	P49911	P49911	Acidic leucine-rich nuclear phosphoprotein 32 family member A	Anp32a	sp|P49911|AN32A_RAT Acidic leucine-rich nuclear phosphoprotein 32 family member A OS=Rattus norvegicus OX=10116 GN=Anp32a PE=2 SV=1	50.6	28.564	1673300	2097500	306090	1787900	1619000	1894600	1892900	1805400	1620500	2414600	1997200	1685400	1984300	1892800	2240600	1739900
965	P50123;P50123-2	P50123;P50123-2	Glutamyl aminopeptidase	Enpep	sp|P50123|AMPE_RAT Glutamyl aminopeptidase OS=Rattus norvegicus OX=10116 GN=Enpep PE=1 SV=2;sp|P50123-2|AMPE_RAT Isoform 2 of Glutamyl aminopeptidase OS=Rattus norvegicus OX=10116 GN=Enpep	14	107.99	257630	463700	882050	287520	269730	279260	369900	264130	472350	528690	342460	315860	356750	400030	404460	285230
966	P50137	P50137	Transketolase	Tkt	sp|P50137|TKT_RAT Transketolase OS=Rattus norvegicus OX=10116 GN=Tkt PE=1 SV=1	49.1	67.643	2683000	3061300	5021600	2494400	2452600	2237700	3060200	2168300	2899200	4262400	3111500	2586900	2744400	3592900	3173400	2592800
967	P50398	P50398	Rab GDP dissociation inhibitor alpha	Gdi1	sp|P50398|GDIA_RAT Rab GDP dissociation inhibitor alpha OS=Rattus norvegicus OX=10116 GN=Gdi1 PE=1 SV=1	72	50.536	2054600	2749000	2711200	2133800	2145800	2179400	2566500	2422600	2558500	3451600	2462600	1985700	2375300	3002000	3093100	2246900
968	P50399	P50399	Rab GDP dissociation inhibitor beta	Gdi2	sp|P50399|GDIB_RAT Rab GDP dissociation inhibitor beta OS=Rattus norvegicus OX=10116 GN=Gdi2 PE=1 SV=2	80.9	50.537	7433500	7274100	3660300	7291200	7194400	7498700	7664300	6877400	7526600	7603700	6853500	6772900	7229800	6689100	6945900	7121800
969	P50408	P50408	V-type proton ATPase subunit F	Atp6v1f	sp|P50408|VATF_RAT V-type proton ATPase subunit F OS=Rattus norvegicus OX=10116 GN=Atp6v1f PE=1 SV=1	68.1	13.37	202740	98831	0	0	100620	0	138400	125830	117820	32312	59123	192120	69647	88094	83144	117210
970	P50411	P50411	Protein phosphatase inhibitor 2	Ppp1r2	sp|P50411|IPP2_RAT Protein phosphatase inhibitor 2 OS=Rattus norvegicus OX=10116 GN=Ppp1r2 PE=1 SV=2	36.1	23.071	59732	84637	35378	63658	53757	57467	63277	41768	97411	83555	55912	103840	63976	80572	77398	42828
971	P50442	P50442	Glycine amidinotransferase, mitochondrial	Gatm	sp|P50442|GATM_RAT Glycine amidinotransferase, mitochondrial OS=Rattus norvegicus OX=10116 GN=Gatm PE=1 SV=1	17	48.242	208610	218530	364570	153040	137230	131960	138850	219210	226070	242560	145090	124530	124000	146100	129700	0
972	P50463	P50463	Cysteine and glycine-rich protein 3	Csrp3	sp|P50463|CSRP3_RAT Cysteine and glycine-rich protein 3 OS=Rattus norvegicus OX=10116 GN=Csrp3 PE=1 SV=1	74.2	20.803	16629000	22377000	20071000	17173000	15455000	18636000	14039000	17526000	11504000	11356000	11798000	6667200	10798000	7989900	12230000	8627800
973	P50475	P50475	Alanine--tRNA ligase, cytoplasmic	Aars	sp|P50475|SYAC_RAT Alanine--tRNA ligase, cytoplasmic OS=Rattus norvegicus OX=10116 GN=Aars1 PE=1 SV=3	41.8	106.79	1907000	2136600	2191100	1775100	1797300	2063200	1745000	1649100	1471000	2257600	2023300	1701100	1818500	1775000	1855400	1695200
974	P50503	P50503	Hsc70-interacting protein	St13	sp|P50503|F10A1_RAT Hsc70-interacting protein OS=Rattus norvegicus OX=10116 GN=St13 PE=1 SV=1	23.1	41.279	1778200	2268700	2766700	1767400	1706300	1795500	1858000	1543800	1606900	1917900	1907900	1734400	1927500	1956000	1918400	1623300
975	P50545-2;P50545	P50545-2;P50545	Tyrosine-protein kinase HCK	Hck	sp|P50545-2|HCK_RAT Isoform 2 of Tyrosine-protein kinase HCK OS=Rattus norvegicus OX=10116 GN=Hck;sp|P50545|HCK_RAT Tyrosine-protein kinase HCK OS=Rattus norvegicus OX=10116 GN=Hck PE=1 SV=4	3.4	56.967	0	0	0	0	0	0	0	0	0	0	0	0	0	0	0	231500
976	P50609	P50609	Fibromodulin	Fmod	sp|P50609|FMOD_RAT Fibromodulin OS=Rattus norvegicus OX=10116 GN=Fmod PE=2 SV=1	17.3	43.218	0	0	60735	0	0	0	225700	143090	0	166210	400000	122880	257420	0	62945	0
977	P50753-2;P50753;Q7TNB2-3;Q7TNB2-4;Q7TNB2-2;Q7TNB2	P50753-2;P50753	Troponin T, cardiac muscle	Tnnt2	sp|P50753-2|TNNT2_RAT Isoform 2 of Troponin T, cardiac muscle OS=Rattus norvegicus OX=10116 GN=Tnnt2;sp|P50753|TNNT2_RAT Troponin T, cardiac muscle OS=Rattus norvegicus OX=10116 GN=Tnnt2 PE=1 SV=2	48.1	34.452	62476000	60776000	20255000	64658000	66528000	72613000	69969000	64220000	64918000	71738000	59835000	58123000	57807000	57594000	56169000	61698000
978	P50878	P50878	60S ribosomal protein L4	Rpl4	sp|P50878|RL4_RAT 60S ribosomal protein L4 OS=Rattus norvegicus OX=10116 GN=Rpl4 PE=1 SV=3	46.3	47.256	3969500	5058700	2687700	3694800	3480000	3768500	3701900	3461800	4403700	7235300	4314700	4323100	4250700	6017300	4737200	4392000
979	P50904	P50904	Ras GTPase-activating protein 1	Rasa1	sp|P50904|RASA1_RAT Ras GTPase-activating protein 1 OS=Rattus norvegicus OX=10116 GN=Rasa1 PE=1 SV=1	10.9	115.44	161770	189910	255530	197860	75159	248750	189390	97861	151530	208840	204530	192090	228950	134100	171250	149140
980	P51111	P51111	Huntingtin	Htt	sp|P51111|HD_RAT Huntingtin OS=Rattus norvegicus OX=10116 GN=Htt PE=1 SV=1	1.7	343.76	165660	212780	137930	102810	341990	0	98547	0	85123	0	0	78165	408070	126690	194040	0
981	P51146	P51146	Ras-related protein Rab-4B	Rab4b	sp|P51146|RAB4B_RAT Ras-related protein Rab-4B OS=Rattus norvegicus OX=10116 GN=Rab4b PE=2 SV=1	19.2	23.629	0	0	0	0	0	0	0	0	0	0	0	0	0	0	55492	0
982	P51583	P51583	Multifunctional protein ADE2;Phosphoribosylaminoimidazole-succinocarboxamide synthase;Phosphoribosylaminoimidazole carboxylase	Paics	sp|P51583|PUR6_RAT Multifunctional protein ADE2 OS=Rattus norvegicus OX=10116 GN=Paics PE=1 SV=3	51.8	47.096	1283100	1320100	2224200	1250500	1005000	1104400	1206800	1032600	1248900	1567700	1448400	1228200	1448800	1254900	1438200	1263100
983	P51593	P51593	E3 ubiquitin-protein ligase HUWE1	Huwe1	sp|P51593|HUWE1_RAT E3 ubiquitin-protein ligase HUWE1 (Fragment) OS=Rattus norvegicus OX=10116 GN=Huwe1 PE=1 SV=2	5.3	37.36	0	0	0	0	0	0	0	0	0	0	0	0	0	0	0	38857
984	P51607	P51607	N-acylglucosamine 2-epimerase	Renbp	sp|P51607|RENBP_RAT N-acylglucosamine 2-epimerase OS=Rattus norvegicus OX=10116 GN=Renbp PE=2 SV=2	12.3	49.604	41089	76022	55852	48996	21681	48766	84433	59638	90720	244740	102370	57354	151000	96712	141070	60984
985	P51635	P51635	Alcohol dehydrogenase [NADP(+)]	Akr1a1	sp|P51635|AK1A1_RAT Aldo-keto reductase family 1 member A1 OS=Rattus norvegicus OX=10116 GN=Akr1a1 PE=1 SV=2	50.8	36.505	1620300	1948300	2876300	1732800	1653900	1502800	1724300	1581300	1714900	2126700	1839700	1528200	2068000	1952500	1927000	1603300
986	P51638	P51638	Caveolin-3	Cav3	sp|P51638|CAV3_RAT Caveolin-3 OS=Rattus norvegicus OX=10116 GN=Cav3 PE=1 SV=1	14.6	17.402	1081500	1841900	5307700	1516300	1358800	1387900	1390100	224790	2136400	2533700	1371300	1152300	1690400	2553600	1553000	1370900
987	P51647	P51647	Retinal dehydrogenase 1	Aldh1a1	sp|P51647|AL1A1_RAT Retinal dehydrogenase 1 OS=Rattus norvegicus OX=10116 GN=Aldh1a1 PE=1 SV=3	49.1	54.458	1234500	2319200	1294900	1134300	1244600	1323000	1855600	1585300	1014200	1155100	917660	605700	700950	868690	773710	711910
988	P51650;P51650-2	P51650;P51650-2	Succinate-semialdehyde dehydrogenase, mitochondrial	Aldh5a1	sp|P51650|SSDH_RAT Succinate-semialdehyde dehydrogenase, mitochondrial OS=Rattus norvegicus OX=10116 GN=Aldh5a1 PE=1 SV=2;sp|P51650-2|SSDH_RAT Isoform Short of Succinate-semialdehyde dehydrogenase, mitochondrial OS=Rattus norvegicus OX=10116 GN=Aldh5a1	46.8	56.131	3403900	3345100	5582300	3873600	3484100	4087700	3682200	3586000	5195400	4458400	5694900	5498500	5333500	4901400	4945600	5484900
989	P51839	P51839	Olfactory guanylyl cyclase GC-D	Gucy2d	sp|P51839|GUC2D_RAT Guanylate cyclase 2D OS=Rattus norvegicus OX=10116 GN=Gucy2d PE=1 SV=2	0.9	122.09	0	0	0	0	0	0	0	0	0	0	0	0	0	0	0	367430
990	P51868	P51868	Calsequestrin-2	Casq2	sp|P51868|CASQ2_RAT Calsequestrin-2 OS=Rattus norvegicus OX=10116 GN=Casq2 PE=1 SV=2	40.4	47.838	20650000	11439000	2230900	25053000	20913000	23711000	19351000	20242000	17893000	13307000	26623000	25904000	21533000	14479000	16153000	25853000
991	P51870	P51870	Cytochrome P450 4F5	Cyp4f5	sp|P51870|CP4F5_RAT Cytochrome P450 4F5 OS=Rattus norvegicus OX=10116 GN=Cyp4f5 PE=2 SV=1	3.8	60.68	0	0	0	0	0	0	0	0	24601	125260	0	0	0	43701	0	0
992	P51886;CON__Q05443	P51886	Lumican	Lum	sp|P51886|LUM_RAT Lumican OS=Rattus norvegicus OX=10116 GN=Lum PE=1 SV=1	38.2	38.279	4478000	4873800	7618500	4243400	4700200	3566000	6212600	5248300	4311900	5951200	6702400	5669600	5857000	5192900	5875800	4923400
993	P52287	P52287	Guanine nucleotide-binding protein G(I)/G(S)/G(T) subunit beta-3	Gnb3	sp|P52287|GBB3_RAT Guanine nucleotide-binding protein G(I)/G(S)/G(T) subunit beta-3 OS=Rattus norvegicus OX=10116 GN=Gnb3 PE=1 SV=1	43.5	37.18	843880	1241800	1508400	977680	798080	998200	930510	803390	1007800	1661300	1001200	896830	889050	1027300	1051300	824410
994	P52296	P52296	Importin subunit beta-1	Kpnb1	sp|P52296|IMB1_RAT Importin subunit beta-1 OS=Rattus norvegicus OX=10116 GN=Kpnb1 PE=1 SV=1	39.1	97.123	2427400	2576800	2626400	2313000	1919200	2387100	2435700	2397200	2364400	3663200	2900800	2762400	3085700	2940900	2986900	2375700
995	P52303-2;P52303	P52303-2;P52303	AP-1 complex subunit beta-1	Ap1b1	sp|P52303-2|AP1B1_RAT Isoform B of AP-1 complex subunit beta-1 OS=Rattus norvegicus OX=10116 GN=Ap1b1;sp|P52303|AP1B1_RAT AP-1 complex subunit beta-1 OS=Rattus norvegicus OX=10116 GN=Ap1b1 PE=1 SV=1	30	103.87	1228800	1707900	1715600	1217400	1067900	1136300	1365100	1107400	1398400	2119200	1381200	1216200	1268400	1681700	1503700	1264500
996	P52481	P52481	Adenylyl cyclase-associated protein 2	Cap2	sp|P52481|CAP2_RAT Adenylyl cyclase-associated protein 2 OS=Rattus norvegicus OX=10116 GN=Cap2 PE=1 SV=1	40.9	52.912	1780500	2150800	3884800	1648000	1705200	1797200	1825600	1579300	1966200	2987800	2072700	1796700	2335100	2244700	2023700	1744300
997	P52504	P52504	NADH dehydrogenase [ubiquinone] iron-sulfur protein 6, mitochondrial	Ndufs6	sp|P52504|NDUS6_RAT NADH dehydrogenase [ubiquinone] iron-sulfur protein 6, mitochondrial OS=Rattus norvegicus OX=10116 GN=Ndufs6 PE=3 SV=1	21.6	12.782	2525400	4194900	6254200	2544600	2842800	2711700	2522500	2194900	3286500	4634400	3265100	2622700	2668500	4688400	3073300	2339700
998	P52555	P52555	Endoplasmic reticulum resident protein 29	Erp29	sp|P52555|ERP29_RAT Endoplasmic reticulum resident protein 29 OS=Rattus norvegicus OX=10116 GN=Erp29 PE=1 SV=2	32.3	28.574	847350	855640	1421800	705190	698280	709410	861350	575910	1029700	1124800	802320	712410	937960	937720	961800	823440
999	P52590	P52590	Nuclear pore complex protein Nup107	Nup107	sp|P52590|NU107_RAT Nuclear pore complex protein Nup107 OS=Rattus norvegicus OX=10116 GN=Nup107 PE=1 SV=1	7.7	107.21	46539	45222	0	58503	83282	0	46507	85838	30489	49779	49367	132810	36636	56254	98189	57549
1000	P52631	P52631	Signal transducer and activator of transcription 3	Stat3	sp|P52631|STAT3_RAT Signal transducer and activator of transcription 3 OS=Rattus norvegicus OX=10116 GN=Stat3 PE=1 SV=1	44.8	88.039	1529900	1683800	1627000	1484700	1345500	1629000	1767800	1295800	1546500	1595200	1321200	1109300	1402000	1343800	1325100	1106200
1001	P52632	P52632	Signal transducer and activator of transcription 5B	Stat5b	sp|P52632|STA5B_RAT Signal transducer and activator of transcription 5B OS=Rattus norvegicus OX=10116 GN=Stat5b PE=1 SV=1	14.6	90.222	75033	174490	153200	108950	65885	67029	84060	62923	89166	263500	132940	99927	110470	199760	192190	90971
1002	P52873	P52873	Pyruvate carboxylase, mitochondrial	Pc	sp|P52873|PYC_RAT Pyruvate carboxylase, mitochondrial OS=Rattus norvegicus OX=10116 GN=Pc PE=1 SV=2	26	129.78	855370	1004600	1174300	989810	1045600	828530	1099200	944420	1060000	540050	491660	335950	377660	503880	392080	533610
1003	P52925	P52925	High mobility group protein B2	Hmgb2	sp|P52925|HMGB2_RAT High mobility group protein B2 OS=Rattus norvegicus OX=10116 GN=Hmgb2 PE=2 SV=2	29.5	24.159	432060	594020	517630	278030	332780	216830	270880	312340	319870	1108700	530570	415750	623250	656910	721540	453510
1004	P52944	P52944	PDZ and LIM domain protein 1	Pdlim1	sp|P52944|PDLI1_RAT PDZ and LIM domain protein 1 OS=Rattus norvegicus OX=10116 GN=Pdlim1 PE=1 SV=4	71.3	35.584	6530200	7788300	9817200	6409100	6569000	6484400	7212700	6715800	8307200	9319600	7385500	6529700	7612400	7604400	7354800	7158200
1005	P53042	P53042	Serine/threonine-protein phosphatase 5	Ppp5c	sp|P53042|PPP5_RAT Serine/threonine-protein phosphatase 5 OS=Rattus norvegicus OX=10116 GN=Ppp5c PE=1 SV=1	33.9	56.916	845170	1090800	854340	880890	753950	981430	949450	835290	921710	897290	753370	691860	785250	905450	834520	806610
1006	P53534	P53534	Glycogen phosphorylase, brain form	Pygb	sp|P53534|PYGB_RAT Glycogen phosphorylase, brain form (Fragment) OS=Rattus norvegicus OX=10116 GN=Pygb PE=1 SV=3	65	96.173	29086000	33862000	26445000	29315000	30586000	29733000	34216000	32883000	22699000	31183000	31103000	29659000	28126000	27886000	26463000	27075000
1007	P53565	P53565	Homeobox protein cut-like 1	Cux1	sp|P53565|CUX1_RAT Homeobox protein cut-like 1 OS=Rattus norvegicus OX=10116 GN=Cux1 PE=1 SV=2	5.3	164.54	107660	108680	520520	116660	71745	78654	90185	99349	86146	164340	109370	97215	102540	111040	90953	59665
1008	P53676;P53678	P53676	AP-3 complex subunit mu-1	Ap3m1	sp|P53676|AP3M1_RAT AP-3 complex subunit mu-1 OS=Rattus norvegicus OX=10116 GN=Ap3m1 PE=1 SV=1	38	46.981	760110	847970	1160400	684320	571830	760640	796260	541790	785120	1050100	688870	695160	772290	779530	855670	728670
1009	P53812;P53812-2	P53812;P53812-2	Phosphatidylinositol transfer protein beta isoform	Pitpnb	sp|P53812|PIPNB_RAT Phosphatidylinositol transfer protein beta isoform OS=Rattus norvegicus OX=10116 GN=Pitpnb PE=1 SV=2;sp|P53812-2|PIPNB_RAT Isoform 2 of Phosphatidylinositol transfer protein beta isoform OS=Rattus norvegicus OX=10116 GN=Pitpnb	32.8	31.45	970860	1026000	1373200	767420	902350	818540	970660	846290	797500	1377200	871520	785500	910510	1024000	879110	837710
1010	P53987	P53987	Monocarboxylate transporter 1	Slc16a1	sp|P53987|MOT1_RAT Monocarboxylate transporter 1 OS=Rattus norvegicus OX=10116 GN=Slc16a1 PE=1 SV=1	17.4	53.238	1833300	2097000	2580000	1782600	1615500	1561100	1659700	1842100	1809100	1984100	1933600	1870700	2295500	2100800	2320300	2114500
1011	P54001	P54001	Prolyl 4-hydroxylase subunit alpha-1	P4ha1	sp|P54001|P4HA1_RAT Prolyl 4-hydroxylase subunit alpha-1 OS=Rattus norvegicus OX=10116 GN=P4ha1 PE=2 SV=2	19.5	60.897	253120	301170	292210	236480	210220	212360	229180	190060	287450	602540	302180	275360	254950	401890	224050	199250
1012	P54290	P54290	Voltage-dependent calcium channel subunit alpha-2/delta-1;Voltage-dependent calcium channel subunit alpha-2-1;Voltage-dependent calcium channel subunit delta-1	Cacna2d1	sp|P54290|CA2D1_RAT Voltage-dependent calcium channel subunit alpha-2/delta-1 OS=Rattus norvegicus OX=10116 GN=Cacna2d1 PE=1 SV=1	20.1	123.82	474730	662890	1284000	560310	605710	514480	604260	656600	759810	837760	902310	740410	682240	782830	813650	699890
1013	P54311	P54311	Guanine nucleotide-binding protein G(I)/G(S)/G(T) subunit beta-1	Gnb1	sp|P54311|GBB1_RAT Guanine nucleotide-binding protein G(I)/G(S)/G(T) subunit beta-1 OS=Rattus norvegicus OX=10116 GN=Gnb1 PE=1 SV=4	42.9	37.377	886660	1363700	1392100	878020	869060	872890	918990	820600	805590	1523700	1046900	856970	933570	1287000	1222500	821350
1014	P54313	P54313	Guanine nucleotide-binding protein G(I)/G(S)/G(T) subunit beta-2	Gnb2	sp|P54313|GBB2_RAT Guanine nucleotide-binding protein G(I)/G(S)/G(T) subunit beta-2 OS=Rattus norvegicus OX=10116 GN=Gnb2 PE=1 SV=4	46.5	37.331	1944000	2566000	3476900	2008500	1825100	1819200	1918800	1837700	2436700	2683900	2380200	2264400	2442900	2553500	2704300	2053200
1015	P54319	P54319	Phospholipase A-2-activating protein	Plaa	sp|P54319|PLAP_RAT Phospholipase A-2-activating protein OS=Rattus norvegicus OX=10116 GN=Plaa PE=1 SV=3	31.9	87.083	1440200	1892300	1795500	1516000	1221500	1369900	1494600	1286800	1325300	2178500	1468700	1407800	1447600	1799600	1579500	1480700
1016	P54645	P54645	5-AMP-activated protein kinase catalytic subunit alpha-1	Prkaa1	sp|P54645|AAPK1_RAT 5-AMP-activated protein kinase catalytic subunit alpha-1 OS=Rattus norvegicus OX=10116 GN=Prkaa1 PE=1 SV=2	10.7	63.973	0	0	0	0	0	0	0	0	0	0	0	0	39707	35896	0	34586
1017	P54758;P54757-5;P54757-4;P54757-3;P54757-2;O08680;P09759;P54759-2;P54759;P54757	P54758;P54757-5;P54757-4;P54757-3;P54757-2;O08680;P09759;P54759-2;P54759;P54757	Ephrin type-A receptor 6;Ephrin type-A receptor 5;Ephrin type-A receptor 3;Ephrin type-B receptor 1;Ephrin type-A receptor 7	Epha6;Epha5;Epha3;Ephb1;Epha7	sp|P54758|EPHA6_RAT Ephrin type-A receptor 6 OS=Rattus norvegicus OX=10116 GN=Epha6 PE=2 SV=2;sp|P54757-5|EPHA5_RAT Isoform 5 of Ephrin type-A receptor 5 OS=Rattus norvegicus OX=10116 GN=Epha5;sp|P54757-4|EPHA5_RAT Isoform 4 of Ephrin type-A receptor 5 OS=	2	116.21	0	0	0	0	0	0	0	0	0	0	0	0	0	0	33130	0
1018	P54921;P85969	P54921	Alpha-soluble NSF attachment protein	Napa	sp|P54921|SNAA_RAT Alpha-soluble NSF attachment protein OS=Rattus norvegicus OX=10116 GN=Napa PE=1 SV=2	47.5	33.192	719150	893150	1798600	766830	750030	742650	741120	810390	693630	1003900	914640	826390	875210	765670	795120	747310
1019	P55043;Q9WTY2	P55043	GTP-binding protein RAD	Rrad	sp|P55043|RAD_RAT GTP-binding protein RAD OS=Rattus norvegicus OX=10116 GN=Rrad PE=2 SV=2	15.4	33.038	339730	272210	434940	178350	191070	162750	188660	169790	50625	267150	154690	134430	52563	206390	154030	175290
1020	P55053	P55053	Fatty acid-binding protein, epidermal	Fabp5	sp|P55053|FABP5_RAT Fatty acid-binding protein 5 OS=Rattus norvegicus OX=10116 GN=Fabp5 PE=1 SV=3	85.9	15.059	2920300	3595600	2136600	3532100	3383400	3145500	3220700	3736500	3090100	4230200	3283700	2841600	3654400	3759600	3599700	3193500
1021	P55063	P55063	Heat shock 70 kDa protein 1-like	Hspa1l	sp|P55063|HS71L_RAT Heat shock 70 kDa protein 1-like OS=Rattus norvegicus OX=10116 GN=Hspa1l PE=2 SV=2	23.2	70.548	0	0	0	0	0	0	0	0	0	146250	0	0	0	0	0	0
1022	P55159	P55159	Serum paraoxonase/arylesterase 1	Pon1	sp|P55159|PON1_RAT Serum paraoxonase/arylesterase 1 OS=Rattus norvegicus OX=10116 GN=Pon1 PE=1 SV=3	37.7	39.358	287800	308450	253330	407130	294200	484290	400860	580110	434690	159210	244310	248870	149240	229680	151210	380330
1023	P55161	P55161	Nck-associated protein 1	Nckap1	sp|P55161|NCKP1_RAT Nck-associated protein 1 OS=Rattus norvegicus OX=10116 GN=Nckap1 PE=2 SV=1	17.7	128.86	1203300	1539000	1450800	1515800	1176300	1405300	1222800	1413400	1272900	1623900	1424300	1400700	1496400	1324600	1661000	1110800
1024	P55260	P55260	Annexin A4	Anxa4	sp|P55260|ANXA4_RAT Annexin A4 OS=Rattus norvegicus OX=10116 GN=Anxa4 PE=1 SV=3	43.3	35.848	529670	627820	832720	506120	508970	453020	523110	499000	800970	761380	587290	476130	559190	755510	612030	430600
1025	P55266	P55266	Double-stranded RNA-specific adenosine deaminase	Adar	sp|P55266|DSRAD_RAT Double-stranded RNA-specific adenosine deaminase OS=Rattus norvegicus OX=10116 GN=Adar PE=1 SV=1	2	129.91	0	0	0	0	0	212290	0	0	368760	0	0	0	0	365040	0	0
1026	P55770	P55770	NHP2-like protein 1;NHP2-like protein 1, N-terminally processed	Nhp2l1	sp|P55770|NH2L1_RAT NHP2-like protein 1 OS=Rattus norvegicus OX=10116 GN=Snu13 PE=2 SV=4	18.8	14.173	109010	174580	0	84615	95500	0	114010	0	103290	0	0	0	133420	158640	208340	0
1027	P56499;P56500	P56499	Mitochondrial uncoupling protein 3	Ucp3	sp|P56499|UCP3_RAT Mitochondrial uncoupling protein 3 OS=Rattus norvegicus OX=10116 GN=Ucp3 PE=2 SV=1	19.8	34.014	86294	72636	91068	72609	96290	79810	0	46838	0	0	119380	200910	200410	147520	199640	201930
1028	P56522	P56522	NADPH:adrenodoxin oxidoreductase, mitochondrial	Fdxr	sp|P56522|ADRO_RAT NADPH:adrenodoxin oxidoreductase, mitochondrial OS=Rattus norvegicus OX=10116 GN=Fdxr PE=1 SV=1	38.3	54.362	1011000	1469900	1881700	1012800	791020	860020	1017600	919270	905220	1649700	1166600	1004100	1130300	1175900	1100100	861210
1029	P56558	P56558	UDP-N-acetylglucosamine--peptide N-acetylglucosaminyltransferase 110 kDa subunit	Ogt	sp|P56558|OGT1_RAT UDP-N-acetylglucosamine--peptide N-acetylglucosaminyltransferase 110 kDa subunit OS=Rattus norvegicus OX=10116 GN=Ogt PE=1 SV=1	25.3	115.6	893640	1070600	1607900	817560	699100	857630	968280	757420	851900	1276500	1020000	933940	1108600	1004000	1082600	903510
1030	P56571	P56571	ES1 protein homolog, mitochondrial		sp|P56571|ES1_RAT ES1 protein homolog, mitochondrial OS=Rattus norvegicus OX=10116 PE=1 SV=2	64.3	28.172	6937300	7645300	7011800	6702200	7127600	7634700	8071100	6862300	8001500	5986500	5105800	5307300	5061400	6249900	5590400	5695200
1031	P56574	P56574	Isocitrate dehydrogenase [NADP], mitochondrial	Idh2	sp|P56574|IDHP_RAT Isocitrate dehydrogenase [NADP], mitochondrial OS=Rattus norvegicus OX=10116 GN=Idh2 PE=1 SV=2	81.6	50.967	105140000	109800000	86414000	106280000	100550000	111400000	110600000	111650000	91835000	97054000	117510000	106430000	105710000	97201000	104670000	102660000
1032	P56603	P56603	Secretory carrier-associated membrane protein 1	Scamp1	sp|P56603|SCAM1_RAT Secretory carrier-associated membrane protein 1 OS=Rattus norvegicus OX=10116 GN=Scamp1 PE=1 SV=1	32	37.998	701390	867870	1724100	776050	717990	666420	889840	679890	849200	1234800	843160	694850	853090	949890	842530	809590
1033	P56741	P56741	Myosin-binding protein C, cardiac-type	Mybpc3	sp|P56741|MYPC_RAT Myosin-binding protein C, cardiac-type OS=Rattus norvegicus OX=10116 GN=Mybpc3 PE=1 SV=2	81.9	140.76	143840000	164460000	145940000	143460000	138020000	143240000	149050000	135800000	174570000	163680000	169660000	151550000	150030000	173400000	157340000	146020000
1034	P56932	P56932	Serine/threonine-protein phosphatase 2A 55 kDa regulatory subunit B delta isoform	Ppp2r2d	sp|P56932|2ABD_RAT Serine/threonine-protein phosphatase 2A 55 kDa regulatory subunit B delta isoform OS=Rattus norvegicus OX=10116 GN=Ppp2r2d PE=2 SV=1	24.7	51.982	54063	47694	0	28451	0	53856	59678	58507	0	54401	71066	57574	39393	42928	103080	82563
1035	P57093	P57093	Phytanoyl-CoA dioxygenase, peroxisomal	Phyh	sp|P57093|PAHX_RAT Phytanoyl-CoA dioxygenase, peroxisomal OS=Rattus norvegicus OX=10116 GN=Phyh PE=1 SV=2	27.8	38.588	739470	1002500	1058800	711680	760760	904020	712060	704470	886710	1122000	986470	992260	977320	1111800	1208700	972480
1036	P57113	P57113	Maleylacetoacetate isomerase	Gstz1	sp|P57113|MAAI_RAT Maleylacetoacetate isomerase OS=Rattus norvegicus OX=10116 GN=Gstz1 PE=1 SV=2	73.1	23.961	1106100	1714700	2031400	1298800	1152000	1186500	1611200	892840	1731400	2157400	1540700	1536000	1235900	1554700	1602600	1426200
1037	P58200	P58200	Vesicle transport through interaction with t-SNAREs homolog 1B	Vti1b	sp|P58200|VTI1B_RAT Vesicle transport through interaction with t-SNAREs homolog 1B OS=Rattus norvegicus OX=10116 GN=Vti1b PE=1 SV=2	20.3	26.703	0	95992	290070	0	92691	75535	53892	51102	205200	0	89667	91426	84226	45606	75983	0
1038	P58366	P58366	Progressive ankylosis protein homolog	Ankh	sp|P58366|ANKH_RAT Progressive ankylosis protein homolog OS=Rattus norvegicus OX=10116 GN=Ankh PE=2 SV=1	6.7	54.264	0	0	0	0	0	0	0	0	2844.1	0	0	0	0	0	0	0
1039	P58405-2;P58405	P58405-2;P58405	Striatin-3	Strn3	sp|P58405-2|STRN3_RAT Isoform 2 of Striatin-3 OS=Rattus norvegicus OX=10116 GN=Strn3;sp|P58405|STRN3_RAT Striatin-3 OS=Rattus norvegicus OX=10116 GN=Strn3 PE=1 SV=2	30.4	79.203	645020	767970	1188200	603530	639630	644840	525740	466560	677010	1000200	715890	628120	715400	689340	751870	614080
1040	P58775	P58775	Tropomyosin beta chain	Tpm2	sp|P58775|TPM2_RAT Tropomyosin beta chain OS=Rattus norvegicus OX=10116 GN=Tpm2 PE=1 SV=1	76.8	32.836	0	0	0	0	0	0	0	0	0	0	0	0	0	0	0	11365
1041	P58775-2	P58775-2	Tropomyosin beta chain	Tpm2	sp|P58775-2|TPM2_RAT Isoform 2 of Tropomyosin beta chain OS=Rattus norvegicus OX=10116 GN=Tpm2	76.4	32.957	166890	70272	0	190350	224900	165750	85233	403560	64774	0	176330	246040	0	129590	116540	132260
1042	P59215;P59215-2	P59215;P59215-2	Guanine nucleotide-binding protein G(o) subunit alpha	Gnao1	sp|P59215|GNAO_RAT Guanine nucleotide-binding protein G(o) subunit alpha OS=Rattus norvegicus OX=10116 GN=Gnao1 PE=1 SV=2;sp|P59215-2|GNAO_RAT Isoform Alpha-2 of Guanine nucleotide-binding protein G(o) subunit alpha OS=Rattus norvegicus OX=10116 GN=Gnao1	45.5	40.068	827150	1160900	1393900	703180	592210	765940	698020	709660	848810	1305500	889340	599690	1036900	930940	1311600	698850
1043	P59798	P59798	Selenoprotein K	Selk	sp|P59798|SELK_RAT Selenoprotein K OS=Rattus norvegicus OX=10116 GN=Selenok PE=3 SV=2	12.8	10.626	0	0	0	0	0	0	0	0	0	0	0	0	0	0	30235	0
1044	P60123	P60123	RuvB-like 1	Ruvbl1	sp|P60123|RUVB1_RAT RuvB-like 1 OS=Rattus norvegicus OX=10116 GN=Ruvbl1 PE=1 SV=1	55.7	50.213	863080	883540	1649600	703130	636680	793320	779010	713920	815600	1455900	964640	887240	1027700	1010500	1089500	876700
1045	P60192	P60192	SNARE-associated protein Snapin	Snapin	sp|P60192|SNAPN_RAT SNARE-associated protein Snapin OS=Rattus norvegicus OX=10116 GN=Snapin PE=1 SV=1	44.9	14.904	0	37306	0	0	0	0	0	62725	0	0	0	142630	153550	0	148860	0
1046	P60522	P60522	Gamma-aminobutyric acid receptor-associated protein-like 2	Gabarapl2	sp|P60522|GBRL2_RAT Gamma-aminobutyric acid receptor-associated protein-like 2 OS=Rattus norvegicus OX=10116 GN=Gabarapl2 PE=3 SV=1	30.8	13.667	52988	0	65206	44613	58890	50266	49681	0	50558	66583	0	0	60306	147230	55980	44263
1047	P60711	P60711	Actin, cytoplasmic 1;Actin, cytoplasmic 1, N-terminally processed	Actb	sp|P60711|ACTB_RAT Actin, cytoplasmic 1 OS=Rattus norvegicus OX=10116 GN=Actb PE=1 SV=1	84.3	41.736	64701000	61054000	50161000	56507000	60258000	52613000	61305000	57254000	62906000	72689000	56266000	50092000	52758000	65553000	52512000	50577000
1048	P60825	P60825	Cold-inducible RNA-binding protein	Cirbp	sp|P60825|CIRBP_RAT Cold-inducible RNA-binding protein OS=Rattus norvegicus OX=10116 GN=Cirbp PE=2 SV=1	43	18.607	92259	54396	52125	172430	125880	160970	137400	123410	229440	229320	307990	399080	247440	209450	325910	306760
1049	P60868	P60868	40S ribosomal protein S20	Rps20	sp|P60868|RS20_RAT 40S ribosomal protein S20 OS=Rattus norvegicus OX=10116 GN=Rps20 PE=3 SV=1	62.2	13.373	2262000	2781200	5320900	2074400	2127200	2076000	2276000	1810200	2309200	3397600	2471900	2147100	2459500	2825000	2554000	2290100
1050	P60892	P60892	Ribose-phosphate pyrophosphokinase 1	Prps1	sp|P60892|PRPS1_RAT Ribose-phosphate pyrophosphokinase 1 OS=Rattus norvegicus OX=10116 GN=Prps1 PE=1 SV=2	39	34.834	1438000	1774800	1277500	1536000	1261200	1597500	1426400	1200500	1235800	1555400	1276600	925060	1108000	1660300	1300200	1195700
1051	P60901	P60901	Proteasome subunit alpha type-6	Psma6	sp|P60901|PSA6_RAT Proteasome subunit alpha type-6 OS=Rattus norvegicus OX=10116 GN=Psma6 PE=1 SV=1	54.9	27.399	2677500	2623000	4543100	2433700	2148700	2437500	3081100	1488600	4379000	4962100	2127000	3161700	2746900	5749400	4427400	3196700
1052	P60905	P60905	DnaJ homolog subfamily C member 5	Dnajc5	sp|P60905|DNJC5_RAT DnaJ homolog subfamily C member 5 OS=Rattus norvegicus OX=10116 GN=Dnajc5 PE=1 SV=1	33.3	22.101	133040	246640	121200	143860	100300	137190	162870	98659	170770	244170	163720	143580	136610	154900	178040	134120
1053	P61016	P61016	Cardiac phospholamban	Pln	sp|P61016|PPLA_RAT Cardiac phospholamban OS=Rattus norvegicus OX=10116 GN=Pln PE=1 SV=1	48.1	6.0945	6291000	5661900	10808000	6279200	6604500	6093000	5540500	4832000	7379300	3454400	5676700	6480300	5868400	7310500	6026500	5405300
1054	P61023	P61023	Calcineurin B homologous protein 1	Chp1	sp|P61023|CHP1_RAT Calcineurin B homologous protein 1 OS=Rattus norvegicus OX=10116 GN=Chp1 PE=1 SV=2	39	22.432	162070	176720	396030	148950	0	114700	133900	118440	66125	233980	166300	191440	130680	250630	231660	160570
1055	P61078;P70711	P61078	Ubiquitin-conjugating enzyme E2 D3	Ube2d3	sp|P61078|UB2D3_RAT Ubiquitin-conjugating enzyme E2 D3 OS=Rattus norvegicus OX=10116 GN=Ube2d3 PE=2 SV=1	42.9	16.687	494310	601040	641770	572560	518990	569550	479430	632590	321240	553770	473730	361970	360540	531280	507850	400320
1056	P61107	P61107	Ras-related protein Rab-14	Rab14	sp|P61107|RAB14_RAT Ras-related protein Rab-14 OS=Rattus norvegicus OX=10116 GN=Rab14 PE=1 SV=3	83.3	23.927	2264500	2308000	1337800	2384300	2351500	2692000	2210700	1927500	2631700	2251800	2008900	2035400	2219100	1895400	2290900	1997400
1057	P61149	P61149	Fibroblast growth factor 1	Fgf1	sp|P61149|FGF1_RAT Fibroblast growth factor 1 OS=Rattus norvegicus OX=10116 GN=Fgf1 PE=1 SV=1	68.4	17.417	342730	381610	782090	353890	265420	318210	298750	399610	408570	433380	390650	396510	512180	345730	425620	389050
1058	P61203;P61203-2	P61203;P61203-2	COP9 signalosome complex subunit 2	Cops2	sp|P61203|CSN2_RAT COP9 signalosome complex subunit 2 OS=Rattus norvegicus OX=10116 GN=Cops2 PE=1 SV=1;sp|P61203-2|CSN2_RAT Isoform 2 of COP9 signalosome complex subunit 2 OS=Rattus norvegicus OX=10116 GN=Cops2	45.6	51.596	658090	886600	611670	656740	660150	741430	809000	661740	643200	973000	749570	688850	700010	880510	864990	644250
1059	P61206;P84079;P84082	P61206;P84079;P84082	ADP-ribosylation factor 3;ADP-ribosylation factor 1;ADP-ribosylation factor 2	Arf3;Arf1;Arf2	sp|P61206|ARF3_RAT ADP-ribosylation factor 3 OS=Rattus norvegicus OX=10116 GN=Arf3 PE=2 SV=2;sp|P84079|ARF1_RAT ADP-ribosylation factor 1 OS=Rattus norvegicus OX=10116 GN=Arf1 PE=1 SV=2;sp|P84082|ARF2_RAT ADP-ribosylation factor 2 OS=Rattus norvegicus OX=1	65.2	20.601	2290800	2488500	653460	2621800	2022200	2233600	2297000	2502600	2046300	2543300	2818700	3108000	2557200	2651000	2584600	2705800
1060	P61212	P61212	ADP-ribosylation factor-like protein 1	Arl1	sp|P61212|ARL1_RAT ADP-ribosylation factor-like protein 1 OS=Rattus norvegicus OX=10116 GN=Arl1 PE=1 SV=1	33.7	20.411	103200	33512	18646	145530	114690	106220	111880	252430	0	0	100710	212050	119920	64896	0	205850
1061	P61227	P61227	Ras-related protein Rap-2b	Rap2b	sp|P61227|RAP2B_RAT Ras-related protein Rap-2b OS=Rattus norvegicus OX=10116 GN=Rap2b PE=2 SV=1	23	20.504	0	118520	187630	131170	0	113450	0	93818	0	197670	265710	119330	33794	162950	186880	125030
1062	P61314	P61314	60S ribosomal protein L15	Rpl15	sp|P61314|RL15_RAT 60S ribosomal protein L15 OS=Rattus norvegicus OX=10116 GN=Rpl15 PE=1 SV=2	43.1	24.146	887260	767140	666640	865100	680180	803240	766830	621490	742320	858060	939220	886800	1026100	879930	1034500	829430
1063	P61354	P61354	60S ribosomal protein L27	Rpl27	sp|P61354|RL27_RAT 60S ribosomal protein L27 OS=Rattus norvegicus OX=10116 GN=Rpl27 PE=2 SV=2	48.5	15.798	1174100	1576200	1621400	1118500	1126000	1252800	1240600	1039600	1331200	2680700	1383100	1262900	1404600	1798400	1629000	1199700
1064	P61459	P61459	Pterin-4-alpha-carbinolamine dehydratase	Pcbd1	sp|P61459|PHS_RAT Pterin-4-alpha-carbinolamine dehydratase OS=Rattus norvegicus OX=10116 GN=Pcbd1 PE=1 SV=2	15.4	11.999	0	0	0	0	0	0	0	0	0	0	0	0	0	0	9679.4	0
1065	P61515;D4AAZ6	P61515;D4AAZ6	Putative 60S ribosomal protein L37a;60S ribosomal protein L37a	Rpl37a-ps1;Rpl37a	sp|P61515|RL37P_RAT Putative 60S ribosomal protein L37a OS=Rattus norvegicus OX=10116 GN=Rpl37a-ps1 PE=5 SV=2;sp|D4AAZ6|RL37A_RAT 60S ribosomal protein L37a OS=Rattus norvegicus OX=10116 GN=Rpl37a PE=1 SV=1	32.6	10.275	0	0	0	0	0	0	0	0	0	0	0	0	0	0	0	42410
1066	P61589	P61589	Transforming protein RhoA	Rhoa	sp|P61589|RHOA_RAT Transforming protein RhoA OS=Rattus norvegicus OX=10116 GN=Rhoa PE=1 SV=1	58.5	21.782	1372900	1411400	1516900	1155400	1322800	1249000	1265700	1322200	1330100	918190	1510400	1337800	1334500	1419800	1420800	1260600
1067	P61621	P61621	Protein transport protein Sec61 subunit alpha isoform 1	Sec61a1	sp|P61621|S61A1_RAT Protein transport protein Sec61 subunit alpha isoform 1 OS=Rattus norvegicus OX=10116 GN=Sec61a1 PE=2 SV=2	21.6	52.264	126930	163770	225400	136140	124610	114030	133350	121530	152670	310420	175420	152620	148430	246970	214520	137450
1068	P61751	P61751	ADP-ribosylation factor 4	Arf4	sp|P61751|ARF4_RAT ADP-ribosylation factor 4 OS=Rattus norvegicus OX=10116 GN=Arf4 PE=2 SV=2	65.6	20.396	277350	311990	301520	229220	182530	194960	281930	228540	224330	221890	268740	203660	272920	263100	274000	191200
1069	P61765;P61765-2	P61765;P61765-2	Syntaxin-binding protein 1	Stxbp1	sp|P61765|STXB1_RAT Syntaxin-binding protein 1 OS=Rattus norvegicus OX=10116 GN=Stxbp1 PE=1 SV=1;sp|P61765-2|STXB1_RAT Isoform 2 of Syntaxin-binding protein 1 OS=Rattus norvegicus OX=10116 GN=Stxbp1	22.4	67.568	132740	173830	215470	172500	73151	128120	148170	227260	134600	248590	128400	87504	193730	170670	129070	173380
1070	P61805	P61805	Dolichyl-diphosphooligosaccharide--protein glycosyltransferase subunit DAD1	Dad1	sp|P61805|DAD1_RAT Dolichyl-diphosphooligosaccharide--protein glycosyltransferase subunit DAD1 OS=Rattus norvegicus OX=10116 GN=Dad1 PE=3 SV=3	28.3	12.497	0	0	632120	128150	0	0	0	0	0	234850	196900	277080	0	0	0	183530
1071	P61954	P61954	Guanine nucleotide-binding protein G(I)/G(S)/G(O) subunit gamma-11	Gng11	sp|P61954|GBG11_RAT Guanine nucleotide-binding protein G(I)/G(S)/G(O) subunit gamma-11 OS=Rattus norvegicus OX=10116 GN=Gng11 PE=3 SV=1	30.1	8.4807	0	0	0	0	0	0	0	0	0	31154	0	0	0	42439	0	0
1072	P61959;Q5XIF4	P61959	Small ubiquitin-related modifier 2	Sumo2	sp|P61959|SUMO2_RAT Small ubiquitin-related modifier 2 OS=Rattus norvegicus OX=10116 GN=Sumo2 PE=1 SV=1	27.4	10.871	103500	115390	0	113660	111720	113080	118890	99554	0	114080	104170	139480	124800	178940	141410	106760
1073	P61972	P61972	Nuclear transport factor 2	Nutf2	sp|P61972|NTF2_RAT Nuclear transport factor 2 OS=Rattus norvegicus OX=10116 GN=Nutf2 PE=1 SV=1	63	14.478	752760	530270	163870	769480	627710	661490	647290	822470	436660	383840	726230	713570	740210	313080	482930	843840
1074	P61980	P61980	Heterogeneous nuclear ribonucleoprotein K	Hnrnpk	sp|P61980|HNRPK_RAT Heterogeneous nuclear ribonucleoprotein K OS=Rattus norvegicus OX=10116 GN=Hnrnpk PE=1 SV=1	62.6	50.976	8942800	9998700	14159000	8638800	7730700	8292900	8491000	8742700	7715500	15297000	11012000	9929500	10710000	10976000	11182000	8694500
1075	P61983	P61983	14-3-3 protein gamma;14-3-3 protein gamma, N-terminally processed	Ywhag	sp|P61983|1433G_RAT 14-3-3 protein gamma OS=Rattus norvegicus OX=10116 GN=Ywhag PE=1 SV=2	67.2	28.302	6527900	7596000	13699000	6337900	6143200	7139100	5862400	6784600	5029600	5586100	5478300	4904300	5387400	6723700	5622400	4704700
1076	P62074	P62074	Mitochondrial import inner membrane translocase subunit Tim10	Timm10	sp|P62074|TIM10_RAT Mitochondrial import inner membrane translocase subunit Tim10 OS=Rattus norvegicus OX=10116 GN=Timm10 PE=3 SV=1	66.7	10.333	834630	905690	729740	778420	915830	838830	770720	878490	898340	1123600	1043700	995450	955090	719120	917660	940730
1077	P62076	P62076	Mitochondrial import inner membrane translocase subunit Tim13	Timm13	sp|P62076|TIM13_RAT Mitochondrial import inner membrane translocase subunit Tim13 OS=Rattus norvegicus OX=10116 GN=Timm13 PE=3 SV=1	78.9	10.458	4276600	5006200	8088100	3993600	3557400	3978800	3939000	3943800	3885800	6342200	5456300	5233800	5403400	5236200	5173200	4044800
1078	P62078	P62078	Mitochondrial import inner membrane translocase subunit Tim8 B	Timm8b	sp|P62078|TIM8B_RAT Mitochondrial import inner membrane translocase subunit Tim8 B OS=Rattus norvegicus OX=10116 GN=Timm8b PE=3 SV=1	50.6	9.2864	772070	936950	2087000	819290	672780	861630	726900	760420	798420	1041800	1084300	982930	936340	1049800	1023200	923640
1079	P62083	P62083	40S ribosomal protein S7	Rps7	sp|P62083|RS7_RAT 40S ribosomal protein S7 OS=Rattus norvegicus OX=10116 GN=Rps7 PE=1 SV=1	64.4	22.127	4981300	3287800	3083200	4591000	4564600	5088500	4239500	4615200	4904600	4522400	5985000	5455900	5415000	4723800	4796500	5800200
1080	P62138	P62138	Serine/threonine-protein phosphatase PP1-alpha catalytic subunit	Ppp1ca	sp|P62138|PP1A_RAT Serine/threonine-protein phosphatase PP1-alpha catalytic subunit OS=Rattus norvegicus OX=10116 GN=Ppp1ca PE=1 SV=1	50.6	37.512	434470	618680	1061700	407740	412610	408310	410490	392820	446660	706610	462290	376000	428170	656300	508550	379570
1081	P62142	P62142	Serine/threonine-protein phosphatase PP1-beta catalytic subunit	Ppp1cb	sp|P62142|PP1B_RAT Serine/threonine-protein phosphatase PP1-beta catalytic subunit OS=Rattus norvegicus OX=10116 GN=Ppp1cb PE=1 SV=3	68.8	37.186	2594000	2635900	1601400	2788100	2427400	3153700	2891200	2842200	2569200	2964600	2677700	2566800	2658400	2102300	2807000	2593700
1082	P62193	P62193	26S protease regulatory subunit 4	Psmc1	sp|P62193|PRS4_RAT 26S proteasome regulatory subunit 4 OS=Rattus norvegicus OX=10116 GN=Psmc1 PE=1 SV=1	56.1	49.184	1878400	2103100	1530200	1831200	2067100	1993300	2074000	2025800	1915300	2694000	2097300	2029800	1936300	2122900	1893700	1958900
1083	P62198	P62198	26S protease regulatory subunit 8	Psmc5	sp|P62198|PRS8_RAT 26S proteasome regulatory subunit 8 OS=Rattus norvegicus OX=10116 GN=Psmc5 PE=1 SV=1	65.5	45.626	2780700	1940600	3568400	2499200	2385800	2663300	2598800	2510800	2066300	2338300	2840400	2695500	2998200	1923900	2629800	2635500
1084	P62243	P62243	40S ribosomal protein S8	Rps8	sp|P62243|RS8_RAT 40S ribosomal protein S8 OS=Rattus norvegicus OX=10116 GN=Rps8 PE=1 SV=2	59.6	24.205	3313700	3431600	4239500	3005600	2984900	3509000	3208500	2535800	3045000	4502700	3756800	3286300	3635700	3877500	3720900	3059100
1085	P62246	P62246	40S ribosomal protein S15a	Rps15a	sp|P62246|RS15A_RAT 40S ribosomal protein S15a OS=Rattus norvegicus OX=10116 GN=Rps15a PE=1 SV=2	60.8	14.839	1722600	1435800	1463200	1379600	1374500	1445000	1464900	1377800	1570800	1495800	1349700	1745900	1394500	1680300	1387600	1650500
1086	P62250	P62250	40S ribosomal protein S16	Rps16	sp|P62250|RS16_RAT 40S ribosomal protein S16 OS=Rattus norvegicus OX=10116 GN=Rps16 PE=1 SV=2	53.4	16.445	4077800	4665200	3193700	3204300	2978300	3563400	3634200	2440900	4038600	5161200	4370400	4077900	4108600	4049200	4379500	4161700
1087	P62255	P62255	Ubiquitin-conjugating enzyme E2 G1;Ubiquitin-conjugating enzyme E2 G1, N-terminally processed	Ube2g1	sp|P62255|UB2G1_RAT Ubiquitin-conjugating enzyme E2 G1 OS=Rattus norvegicus OX=10116 GN=Ube2g1 PE=2 SV=3	6.5	19.509	159380	111080	251180	115320	134120	117200	129580	147460	164080	153340	130930	140280	153880	123240	127520	157580
1088	P62260	P62260	14-3-3 protein epsilon	Ywhae	sp|P62260|1433E_RAT 14-3-3 protein epsilon OS=Rattus norvegicus OX=10116 GN=Ywhae PE=1 SV=1	77.6	29.174	14694000	17547000	12497000	14297000	12807000	14787000	15143000	13543000	13141000	19830000	18166000	15547000	17131000	19325000	18363000	15178000
1089	P62268	P62268	40S ribosomal protein S23	Rps23	sp|P62268|RS23_RAT 40S ribosomal protein S23 OS=Rattus norvegicus OX=10116 GN=Rps23 PE=1 SV=3	40.6	15.807	355870	335150	46939	123590	134980	83456	177080	131190	125500	280250	251660	134230	87335	348580	125830	170820
1090	P62271	P62271	40S ribosomal protein S18	Rps18	sp|P62271|RS18_RAT 40S ribosomal protein S18 OS=Rattus norvegicus OX=10116 GN=Rps18 PE=1 SV=3	65.1	17.718	3728200	3587500	3582900	3334600	3768500	4039800	3424500	2999800	4245600	4285100	4005500	3363800	3967000	3842700	4127400	3506800
1091	P62275	P62275	40S ribosomal protein S29	Rps29	sp|P62275|RS29_RAT 40S ribosomal protein S29 OS=Rattus norvegicus OX=10116 GN=Rps29 PE=1 SV=2	46.4	6.6767	995840	918350	479860	904890	839910	1078100	830860	936240	855500	1079600	1120200	886570	1076600	630670	1228400	821400
1092	P62278	P62278	40S ribosomal protein S13	Rps13	sp|P62278|RS13_RAT 40S ribosomal protein S13 OS=Rattus norvegicus OX=10116 GN=Rps13 PE=1 SV=2	47.7	17.222	4926100	4999200	5148500	4634600	5016800	5503400	5056400	4296700	4690700	6149900	5855400	5196900	6017500	5234100	5739600	5398900
1093	P62282	P62282	40S ribosomal protein S11	Rps11	sp|P62282|RS11_RAT 40S ribosomal protein S11 OS=Rattus norvegicus OX=10116 GN=Rps11 PE=1 SV=3	63.9	18.431	1618500	1509200	2178400	1323500	1507100	1299100	1238900	1056300	1460300	1577600	1272700	1324600	1307500	1969900	1537700	1524400
1094	P62329	P62329	Thymosin beta-4;Hematopoietic system regulatory peptide	Tmsb4x	sp|P62329|TYB4_RAT Thymosin beta-4 OS=Rattus norvegicus OX=10116 GN=Tmsb4x PE=1 SV=2	88.6	5.0526	5876800	7505600	9504500	4902200	4150300	5272000	6105800	5706100	4068500	7046900	4384800	3975300	5296300	5647100	4754300	4407300
1095	P62332	P62332	ADP-ribosylation factor 6	Arf6	sp|P62332|ARF6_RAT ADP-ribosylation factor 6 OS=Rattus norvegicus OX=10116 GN=Arf6 PE=1 SV=2	38.9	20.082	185240	170900	59156	122300	153020	132520	150320	127200	160410	91701	143640	157310	177030	139270	174800	147240
1096	P62425	P62425	60S ribosomal protein L7a	Rpl7a	sp|P62425|RL7A_RAT 60S ribosomal protein L7a OS=Rattus norvegicus OX=10116 GN=Rpl7a PE=1 SV=2	58.3	29.995	3526100	3580300	2563900	3321200	2723700	3253400	3296900	2882200	3191900	4750600	3664100	3526500	3753700	4375200	3852900	3565400
1097	P62489	P62489	DNA-directed RNA polymerase II subunit RPB7	Polr2g	sp|P62489|RPB7_RAT DNA-directed RNA polymerase II subunit RPB7 OS=Rattus norvegicus OX=10116 GN=Polr2g PE=2 SV=1	18.6	19.294	0	0	0	0	108790	0	0	0	0	0	0	0	33036	0	0	0
1098	P62501	P62501	TSC22 domain family protein 1	Tsc22d1	sp|P62501|T22D1_RAT TSC22 domain family protein 1 OS=Rattus norvegicus OX=10116 GN=Tsc22d1 PE=2 SV=1	16.8	15.582	0	0	0	0	0	0	0	0	0	0	0	0	0	0	15360	0
1099	P62510-2;P62510	P62510-2;P62510	Estrogen-related receptor gamma	Esrrg	sp|P62510-2|ERR3_RAT Isoform 2 of Estrogen-related receptor gamma OS=Rattus norvegicus OX=10116 GN=Esrrg;sp|P62510|ERR3_RAT Estrogen-related receptor gamma OS=Rattus norvegicus OX=10116 GN=Esrrg PE=2 SV=1	3.9	48.58	0	2631.7	0	0	0	0	0	0	0	0	0	0	0	0	0	0
1100	P62628	P62628	Dynein light chain roadblock-type 1	Dynlrb1	sp|P62628|DLRB1_RAT Dynein light chain roadblock-type 1 OS=Rattus norvegicus OX=10116 GN=Dynlrb1 PE=1 SV=3	83.3	10.99	1633600	1908300	1177900	1577700	1620500	1586700	1602700	1600900	1423500	1958100	1800200	1537200	1824600	1693900	1846700	1508900
1101	P62630	P62630	Elongation factor 1-alpha 1	Eef1a1	sp|P62630|EF1A1_RAT Elongation factor 1-alpha 1 OS=Rattus norvegicus OX=10116 GN=Eef1a1 PE=2 SV=1	72.1	50.113	12951000	12664000	7914900	12712000	10905000	12235000	13079000	12288000	12344000	19482000	16440000	14087000	17239000	21260000	18983000	13916000
1102	P62632	P62632	Elongation factor 1-alpha 2	Eef1a2	sp|P62632|EF1A2_RAT Elongation factor 1-alpha 2 OS=Rattus norvegicus OX=10116 GN=Eef1a2 PE=1 SV=1	63.9	50.454	31457000	31179000	22573000	28842000	30220000	28546000	31532000	26806000	29362000	23257000	26954000	24242000	25319000	29164000	26634000	27285000
1103	P62634	P62634	Cellular nucleic acid-binding protein	Cnbp	sp|P62634|CNBP_RAT Cellular nucleic acid-binding protein OS=Rattus norvegicus OX=10116 GN=Cnbp PE=2 SV=1	44.6	19.463	861390	1073400	425640	811430	676000	909740	679670	728330	813980	1122700	737390	544960	886720	591580	1019500	575620
1104	P62703	P62703	40S ribosomal protein S4, X isoform	Rps4x	sp|P62703|RS4X_RAT 40S ribosomal protein S4, X isoform OS=Rattus norvegicus OX=10116 GN=Rps4x PE=2 SV=2	55.9	29.597	3798600	3825300	3976300	3302600	3330100	3447900	3310200	3277500	4239200	5018100	3943200	3734600	3808500	4329600	4183000	3704500
1105	P62716;P63331	P62716;P63331	Serine/threonine-protein phosphatase 2A catalytic subunit beta isoform;Serine/threonine-protein phosphatase 2A catalytic subunit alpha isoform	Ppp2cb;Ppp2ca	sp|P62716|PP2AB_RAT Serine/threonine-protein phosphatase 2A catalytic subunit beta isoform OS=Rattus norvegicus OX=10116 GN=Ppp2cb PE=2 SV=1;sp|P63331|PP2AA_RAT Serine/threonine-protein phosphatase 2A catalytic subunit alpha isoform OS=Rattus norvegicus OX	54.4	35.575	1755800	1532600	1166900	1851400	1768400	2022300	1839600	1845900	2142500	2374400	1760000	1849100	1786400	1546200	1544300	1858200
1106	P62718	P62718	60S ribosomal protein L18a	Rpl18a	sp|P62718|RL18A_RAT 60S ribosomal protein L18a OS=Rattus norvegicus OX=10116 GN=Rpl18a PE=2 SV=1	29	20.732	473410	679330	568810	433330	505330	530990	467570	251950	367210	1088300	637590	635390	581800	700860	626010	499140
1107	P62738	P62738	Actin, aortic smooth muscle	Acta2	sp|P62738|ACTA_RAT Actin, aortic smooth muscle OS=Rattus norvegicus OX=10116 GN=Acta2 PE=2 SV=1	84.1	42.009	0	0	0	0	0	0	0	0	0	0	0	0	1380.9	0	0	0
1108	6658;486659;486660;486661;486662;486663;486664;486665;486666;486667;486668;486669;486670;486671;486672;486673;486674;486675;486676;486677;486678;486679;486680;486681;486682;486683;486684;486685;486686;486687;486688;486689;486690;486691;486692;486693;486694;486695;486696;486697;486698;486699;486700;486701;486702;486703;486704;486705;486706;486707;486708;498077;498078;498079;498080;498081;498082;49…	10616;10617;10618;10619;10620;10621;10622;10623;10624;10625;10626;10627;10628;10629;10630;10631;10632;10633;10634;10635;10636;30336;30337;30338;30339;30340;30341;30342;30343;30344;30345;30346;30347;30348;30349;30350;30351;30352;30353;30354;30355;30356;30357;30358;30359;30360;30361;30362;30363;30364;30365;30366;30367;30368;30369;30370;30371;30372;30373;30374;30375;30376;30377;30378;30379;30380;303…	46;49;84;178;192;229;271;285;307;315;327	157;162;168;171;231;302;305;306	-1
1109	P62744	P62744	AP-2 complex subunit sigma	Ap2s1	sp|P62744|AP2S1_RAT AP-2 complex subunit sigma OS=Rattus norvegicus OX=10116 GN=Ap2s1 PE=1 SV=1	32.4	17.018	82752	102180	201880	79537	67037	90399	103890	71606	87253	79941	197700	154030	135110	64782	111210	87530
1110	P62752	P62752	60S ribosomal protein L23a	Rpl23a	sp|P62752|RL23A_RAT 60S ribosomal protein L23a OS=Rattus norvegicus OX=10116 GN=Rpl23a PE=2 SV=1	53.8	17.695	2366500	2838800	4024400	1970700	2033300	2123600	2009900	1905300	2305100	4198700	2543700	2302600	2424800	3535100	2731300	2167900
1111	P62755	P62755	40S ribosomal protein S6	Rps6	sp|P62755|RS6_RAT 40S ribosomal protein S6 OS=Rattus norvegicus OX=10116 GN=Rps6 PE=1 SV=1	34.1	28.68	3130800	3385600	3421700	2816200	3157500	2885700	2909300	2654700	3285500	3308300	3369700	3261300	3007800	3472900	3227300	3126700
1112	P62775	P62775	Myotrophin	Mtpn	sp|P62775|MTPN_RAT Myotrophin OS=Rattus norvegicus OX=10116 GN=Mtpn PE=1 SV=2	56.8	12.861	724220	951610	574070	740390	686130	711890	918010	608740	753900	892570	723090	619040	821280	912860	728370	728510
1113	P62804	P62804	Histone H4;Osteogenic growth peptide	Hist1h4b	sp|P62804|H4_RAT Histone H4 OS=Rattus norvegicus OX=10116 GN=H4c2 PE=1 SV=2	68.9	11.367	53284000	51940000	17901000	52148000	62228000	54905000	57099000	45261000	64661000	65417000	59019000	71799000	62257000	54991000	63603000	65285000
1114	P62804-2	P62804-2	Histone H4;Osteogenic growth peptide	Hist1h4b	sp|P62804-2|H4_RAT Isoform OGP precursor of Histone H4 OS=Rattus norvegicus OX=10116 GN=H4c2	84.2	2.1315	375470	391910	793350	337350	336770	361970	279060	552350	198860	954140	1056300	485270	710350	340030	884450	424140
1115	P62815	P62815	V-type proton ATPase subunit B, brain isoform	Atp6v1b2	sp|P62815|VATB2_RAT V-type proton ATPase subunit B, brain isoform OS=Rattus norvegicus OX=10116 GN=Atp6v1b2 PE=1 SV=1	62.2	56.55	2253100	2165800	3957000	2028300	2068600	1947700	2274200	2486300	1845800	2425800	2035700	2073600	2175600	2095100	1796600	1980700
1116	P62828;Q8K586	P62828;Q8K586	GTP-binding nuclear protein Ran;GTP-binding nuclear protein Ran, testis-specific isoform	Ran;Rasl2-9	sp|P62828|RAN_RAT GTP-binding nuclear protein Ran OS=Rattus norvegicus OX=10116 GN=Ran PE=1 SV=3;sp|Q8K586|RANT_RAT GTP-binding nuclear protein Ran, testis-specific isoform OS=Rattus norvegicus OX=10116 GN=Rasl2-9 PE=2 SV=1	50	24.423	3134900	3262100	4987500	2673400	2839800	2766100	2920100	2743800	2392300	3409000	3239200	2887000	2623800	2985200	3325900	2943400
1117	P62832	P62832	60S ribosomal protein L23	Rpl23	sp|P62832|RL23_RAT 60S ribosomal protein L23 OS=Rattus norvegicus OX=10116 GN=Rpl23 PE=2 SV=1	47.9	14.865	2190900	2376900	2256800	1902500	1892000	2189300	2190000	1659000	2291300	2202700	2398300	2247400	2194700	3079100	2551700	2068900
1118	P62836	P62836	Ras-related protein Rap-1A	Rap1a	sp|P62836|RAP1A_RAT Ras-related protein Rap-1A OS=Rattus norvegicus OX=10116 GN=Rap1a PE=1 SV=1	66.3	20.987	1452700	2140500	1805500	1571100	1255200	1614100	1522100	1441200	1914000	2814100	2085500	1938400	1997500	2533700	2116100	1754500
1119	P62839	P62839	Ubiquitin-conjugating enzyme E2 D2	Ube2d2	sp|P62839|UB2D2_RAT Ubiquitin-conjugating enzyme E2 D2 OS=Rattus norvegicus OX=10116 GN=Ube2d2 PE=1 SV=1	42.9	16.735	0	0	0	0	0	0	0	0	0	0	0	0	0	0	0	14515
1120	P62845	P62845	40S ribosomal protein S15	Rps15	sp|P62845|RS15_RAT 40S ribosomal protein S15 OS=Rattus norvegicus OX=10116 GN=Rps15 PE=1 SV=2	55.9	17.04	1944600	1982300	1972300	1494300	1652100	1711300	1745300	1619300	1667400	1585700	2651900	1959700	2274900	2037700	2197300	1873000
1121	P62850-2;P62850-3;P62850	P62850-2;P62850-3;P62850	40S ribosomal protein S24	Rps24	sp|P62850-2|RS24_RAT Isoform 2 of 40S ribosomal protein S24 OS=Rattus norvegicus OX=10116 GN=Rps24;sp|P62850-3|RS24_RAT Isoform 3 of 40S ribosomal protein S24 OS=Rattus norvegicus OX=10116 GN=Rps24;sp|P62850|RS24_RAT 40S ribosomal protein S24 OS=Rattus nor	27.7	15.069	496080	439300	239120	460170	432190	470960	412310	411830	571760	496890	526140	404760	476130	479300	545130	542830
1122	P62853	P62853	40S ribosomal protein S25	Rps25	sp|P62853|RS25_RAT 40S ribosomal protein S25 OS=Rattus norvegicus OX=10116 GN=Rps25 PE=2 SV=1	46.4	13.742	1690700	1598700	5013200	1494300	1292600	1367900	1564600	1412100	1228500	1694500	2052500	2011400	2051300	1529700	1832700	1906700
1123	P62856	P62856	40S ribosomal protein S26	Rps26	sp|P62856|RS26_RAT 40S ribosomal protein S26 OS=Rattus norvegicus OX=10116 GN=Rps26 PE=3 SV=3	20.9	13.015	778390	0	360920	728900	795740	679330	599570	632550	426600	0	658090	1025200	338910	160780	0	821200
1124	P62859	P62859	40S ribosomal protein S28	Rps28	sp|P62859|RS28_RAT 40S ribosomal protein S28 OS=Rattus norvegicus OX=10116 GN=Rps28 PE=1 SV=1	60.9	7.8409	1620200	1595500	1388600	1399300	1670600	1570600	1335200	1391100	1800800	2517800	2244400	1592400	1665700	1987100	2119800	1685700
1125	P62864	P62864	40S ribosomal protein S30	Fau	sp|P62864|RS30_RAT 40S ribosomal protein S30 OS=Rattus norvegicus OX=10116 GN=Fau PE=1 SV=1	18.6	6.6478	881650	1395800	2038100	862090	911510	900380	964820	614210	1163300	1735100	1346400	1179400	1262000	1644300	1246900	868900
1126	P62870	P62870	Transcription elongation factor B polypeptide 2	Tceb2	sp|P62870|ELOB_RAT Elongin-B OS=Rattus norvegicus OX=10116 GN=Elob PE=1 SV=1	79.7	13.17	750450	1050800	771510	713990	851630	733570	759120	897020	796580	1100400	761110	774490	756030	961320	869130	806340
1127	P62890	P62890	60S ribosomal protein L30	Rpl30	sp|P62890|RL30_RAT 60S ribosomal protein L30 OS=Rattus norvegicus OX=10116 GN=Rpl30 PE=3 SV=2	50.4	12.784	763670	827460	383050	665270	496040	718560	624400	588640	778450	742940	630390	549230	591290	640230	711870	687990
1128	P62893	P62893	60S ribosomal protein L39	Rpl39	sp|P62893|RL39_RAT 60S ribosomal protein L39 OS=Rattus norvegicus OX=10116 GN=Rpl39 PE=1 SV=2	19.6	6.4066	0	0	0	0	0	0	0	0	0	0	0	0	0	0	0	24333
1129	P62898	P62898	Cytochrome c, somatic	Cycs	sp|P62898|CYC_RAT Cytochrome c, somatic OS=Rattus norvegicus OX=10116 GN=Cycs PE=1 SV=2	64.8	11.605	42541000	40107000	27718000	41051000	45973000	44349000	38993000	47380000	47553000	34083000	44272000	41068000	39971000	38100000	39417000	42534000
1130	P62902	P62902	60S ribosomal protein L31	Rpl31	sp|P62902|RL31_RAT 60S ribosomal protein L31 OS=Rattus norvegicus OX=10116 GN=Rpl31 PE=2 SV=1	47.2	14.463	1224600	997940	2097900	1087200	1005800	1153600	1147500	807770	1456300	1304900	1273900	1162600	1301600	1320100	1539800	1227300
1131	P62907	P62907	60S ribosomal protein L10a	Rpl10a	sp|P62907|RL10A_RAT 60S ribosomal protein L10a OS=Rattus norvegicus OX=10116 GN=Rpl10a PE=1 SV=2	36.4	24.831	3080700	3828100	2217900	2868000	2921800	3112500	2979800	2511600	2829900	4727900	3906600	3142100	3544500	3891000	3708000	2956100
1132	P62909	P62909	40S ribosomal protein S3	Rps3	sp|P62909|RS3_RAT 40S ribosomal protein S3 OS=Rattus norvegicus OX=10116 GN=Rps3 PE=1 SV=1	67.9	26.674	5653000	6450500	7019300	5744100	5117900	5781200	5578900	4810700	6371100	7280300	6003000	6188500	6119900	6679700	6426900	6357000
1133	P62912	P62912	60S ribosomal protein L32	Rpl32	sp|P62912|RL32_RAT 60S ribosomal protein L32 OS=Rattus norvegicus OX=10116 GN=Rpl32 PE=1 SV=2	46.7	15.86	349820	485850	256040	354490	281120	365580	369090	252650	399230	722400	382180	427020	368600	542280	477650	393980
1134	P62914	P62914	60S ribosomal protein L11	Rpl11	sp|P62914|RL11_RAT 60S ribosomal protein L11 OS=Rattus norvegicus OX=10116 GN=Rpl11 PE=1 SV=2	41.6	20.252	2692800	3271300	6666100	2724000	2423300	2628500	2387000	2415500	2742300	3408600	2778500	2658000	3045800	3000800	3042800	2322900
1135	P62916	P62916	Transcription initiation factor IIB	Gtf2b	sp|P62916|TF2B_RAT Transcription initiation factor IIB OS=Rattus norvegicus OX=10116 GN=Gtf2b PE=2 SV=1	13	34.819	0	0	0	0	0	0	0	0	0	33006	0	0	0	0	0	0
1136	P62919	P62919	60S ribosomal protein L8	Rpl8	sp|P62919|RL8_RAT 60S ribosomal protein L8 OS=Rattus norvegicus OX=10116 GN=Rpl8 PE=2 SV=2	40.5	28.024	1470300	1928200	2398100	1350200	1287800	1387000	1449900	1216000	1490300	2293700	1438200	1334500	1389300	1959200	1642100	1424300
1137	P62944;P62944-2	P62944;P62944-2	AP-2 complex subunit beta	Ap2b1	sp|P62944|AP2B1_RAT AP-2 complex subunit beta OS=Rattus norvegicus OX=10116 GN=Ap2b1 PE=1 SV=1;sp|P62944-2|AP2B1_RAT Isoform 2 of AP-2 complex subunit beta OS=Rattus norvegicus OX=10116 GN=Ap2b1	33.9	104.55	3025300	3342100	1477500	3091800	2459800	2811800	3249000	2420100	2709800	4109900	3677100	3251300	3847400	3417300	3661700	2798800
1138	P62959	P62959	Histidine triad nucleotide-binding protein 1	Hint1	sp|P62959|HINT1_RAT Histidine triad nucleotide-binding protein 1 OS=Rattus norvegicus OX=10116 GN=Hint1 PE=1 SV=5	79.4	13.777	2659700	2269400	4095200	3042300	3456700	3572700	3448500	2850400	2471700	772870	2244000	3084800	3315700	1748200	2550100	3356900
1139	P62961	P62961	Nuclease-sensitive element-binding protein 1	Ybx1	sp|P62961|YBOX1_RAT Y-box-binding protein 1 OS=Rattus norvegicus OX=10116 GN=Ybx1 PE=2 SV=3	65.8	35.73	1856900	1920100	3491900	1629600	1497300	1886200	1629400	1462900	1425800	1972700	1621900	1480400	2081300	1831900	1868600	1780500
1140	P62963	P62963	Profilin-1	Pfn1	sp|P62963|PROF1_RAT Profilin-1 OS=Rattus norvegicus OX=10116 GN=Pfn1 PE=1 SV=2	81.4	14.957	6968900	8457800	8529600	7795200	6879900	8010300	8209300	8133800	5788900	6865900	9208000	8068600	8569200	6749100	9613900	6696500
1141	P62982;P62986;P0CG51;Q63429	P62982;P62986;P0CG51;Q63429	Ubiquitin-40S ribosomal protein S27a;Ubiquitin;40S ribosomal protein S27a;Ubiquitin-60S ribosomal protein L40;Ubiquitin;60S ribosomal protein L40;Polyubiquitin-B;Ubiquitin;Polyubiquitin-C;Ubiquitin;Ubiquitin-related	Rps27a;Uba52;Ubb;Ubc	sp|P62982|RS27A_RAT Ubiquitin-40S ribosomal protein S27a OS=Rattus norvegicus OX=10116 GN=Rps27a PE=1 SV=2;sp|P62986|RL40_RAT Ubiquitin-60S ribosomal protein L40 OS=Rattus norvegicus OX=10116 GN=Uba52 PE=1 SV=2;sp|P0CG51|UBB_RAT Polyubiquitin-B OS=Rattus n	68.6	17.951	9062600	12636000	5966200	9903900	6862000	9070100	9023100	8457400	8635500	15416000	9610300	9185700	9545300	10540000	10641000	8390300
1142	P62994;P62994-2;P62994-3	P62994;P62994-2	Growth factor receptor-bound protein 2	Grb2	sp|P62994|GRB2_RAT Growth factor receptor-bound protein 2 OS=Rattus norvegicus OX=10116 GN=Grb2 PE=1 SV=1;sp|P62994-2|GRB2_RAT Isoform 2 of Growth factor receptor-bound protein 2 OS=Rattus norvegicus OX=10116 GN=Grb2	56.7	25.206	570950	725940	809830	565660	540210	559200	539620	627070	433990	601220	571410	452380	401360	522420	549640	395950
1143	P62997	P62997	Transformer-2 protein homolog beta	Tra2b	sp|P62997|TRA2B_RAT Transformer-2 protein homolog beta OS=Rattus norvegicus OX=10116 GN=Tra2b PE=1 SV=1	28.8	33.665	334570	342880	290950	311650	333410	380750	230300	287030	390350	439260	368980	381890	436000	372470	422310	323070
1144	P63004	P63004	Platelet-activating factor acetylhydrolase IB subunit alpha	Pafah1b1	sp|P63004|LIS1_RAT Platelet-activating factor acetylhydrolase IB subunit alpha OS=Rattus norvegicus OX=10116 GN=Pafah1b1 PE=1 SV=2	37.6	46.67	897440	1172400	853030	923710	809750	834360	955650	778230	893480	1378600	913390	709840	947190	1159700	849850	860300
1145	P63012	P63012	Ras-related protein Rab-3A	Rab3a	sp|P63012|RAB3A_RAT Ras-related protein Rab-3A OS=Rattus norvegicus OX=10116 GN=Rab3a PE=1 SV=1	34.5	24.97	175420	213980	681750	311780	194840	131990	260450	266180	267880	239630	343780	258600	358240	233220	294740	278040
1146	P63018	P63018	Heat shock cognate 71 kDa protein	Hspa8	sp|P63018|HSP7C_RAT Heat shock cognate 71 kDa protein OS=Rattus norvegicus OX=10116 GN=Hspa8 PE=1 SV=1	82	70.87	67121000	75798000	100560000	63381000	63582000	66011000	65945000	62725000	65372000	81158000	65158000	58282000	66151000	73718000	65423000	60405000
1147	P63025	P63025	Vesicle-associated membrane protein 3	Vamp3	sp|P63025|VAMP3_RAT Vesicle-associated membrane protein 3 OS=Rattus norvegicus OX=10116 GN=Vamp3 PE=1 SV=1	63.1	11.48	565610	691510	1048700	561480	607740	543770	608190	613410	583740	575490	620860	544930	572540	633420	568930	597860
1148	P63029	P63029	Translationally-controlled tumor protein	Tpt1	sp|P63029|TCTP_RAT Translationally-controlled tumor protein OS=Rattus norvegicus OX=10116 GN=Tpt1 PE=1 SV=1	39.5	19.462	5538500	4331400	2555100	5272700	5080200	5580400	4746200	4562000	3021100	4787800	5271200	4920800	4905000	3515300	5069300	5157900
1149	P63031	P63031	Mitochondrial pyruvate carrier 1	Mpc1	sp|P63031|MPC1_RAT Mitochondrial pyruvate carrier 1 OS=Rattus norvegicus OX=10116 GN=Mpc1 PE=3 SV=1	19.3	12.454	948480	1474400	5840800	838760	1261200	788400	837640	174380	820400	1146800	981190	815400	653550	1401700	1307000	773000
1150	P63036	P63036	DnaJ homolog subfamily A member 1	Dnaja1	sp|P63036|DNJA1_RAT DnaJ homolog subfamily A member 1 OS=Rattus norvegicus OX=10116 GN=Dnaja1 PE=1 SV=1	47.1	44.868	436310	547500	289260	396170	520440	414470	457450	407420	462890	458450	393370	367390	356570	479390	421840	390020
1151	P63039	P63039	60 kDa heat shock protein, mitochondrial	Hspd1	sp|P63039|CH60_RAT 60 kDa heat shock protein, mitochondrial OS=Rattus norvegicus OX=10116 GN=Hspd1 PE=1 SV=1	85.7	60.955	66635000	67291000	75016000	68536000	74189000	68377000	66923000	71606000	68142000	66222000	72286000	76688000	67269000	66334000	66110000	71268000
1152	P63045	P63045	Vesicle-associated membrane protein 2	Vamp2	sp|P63045|VAMP2_RAT Vesicle-associated membrane protein 2 OS=Rattus norvegicus OX=10116 GN=Vamp2 PE=1 SV=2	43.1	12.691	345450	435310	564220	357880	381860	325010	339500	337100	326550	402540	386110	455670	414130	406140	337130	378500
1153	P63074	P63074	Eukaryotic translation initiation factor 4E	Eif4e	sp|P63074|IF4E_RAT Eukaryotic translation initiation factor 4E OS=Rattus norvegicus OX=10116 GN=Eif4e PE=1 SV=1	30.9	25.053	318770	448740	0	406500	292840	486110	456380	389530	366480	572110	435860	365370	484100	396430	455070	291140
1154	P63086	P63086	Mitogen-activated protein kinase 1	Mapk1	sp|P63086|MK01_RAT Mitogen-activated protein kinase 1 OS=Rattus norvegicus OX=10116 GN=Mapk1 PE=1 SV=3	49.2	41.275	346090	306550	1273000	399970	504580	406600	397060	433790	440810	417980	355290	373080	328320	338100	245210	440060
1155	P63088;P63088-2	P63088;P63088-2	Serine/threonine-protein phosphatase PP1-gamma catalytic subunit	Ppp1cc	sp|P63088|PP1G_RAT Serine/threonine-protein phosphatase PP1-gamma catalytic subunit OS=Rattus norvegicus OX=10116 GN=Ppp1cc PE=1 SV=1;sp|P63088-2|PP1G_RAT Isoform 2 of Serine/threonine-protein phosphatase PP1-gamma catalytic subunit OS=Rattus norvegicus OX	42.7	36.983	0	219880	399430	173890	171690	161120	170930	178810	135940	242180	155030	0	173270	169890	175940	107980
1156	P63095;P63095-2;Q63803;P38406;P63095-3	P63095;P63095-2;Q63803	Guanine nucleotide-binding protein G(s) subunit alpha isoforms short;Guanine nucleotide-binding protein G(s) subunit alpha isoforms XLas	Gnas	sp|P63095|GNAS2_RAT Guanine nucleotide-binding protein G(s) subunit alpha isoforms short OS=Rattus norvegicus OX=10116 GN=Gnas PE=1 SV=1;sp|P63095-2|GNAS2_RAT Isoform Gnas-2 of Guanine nucleotide-binding protein G(s) subunit alpha isoforms short OS=Rattus	40.9	45.663	702340	905550	582670	818150	640130	788380	781320	636510	856470	987660	994590	941470	972450	833310	1038700	848410
1157	P63102	P63102	14-3-3 protein zeta/delta	Ywhaz	sp|P63102|1433Z_RAT 14-3-3 protein zeta/delta OS=Rattus norvegicus OX=10116 GN=Ywhaz PE=1 SV=1	75.9	27.771	6291000	7597600	13402000	5811600	5741300	5552600	6088300	5906000	5436800	8179500	6482300	5411000	6404600	7481600	6880700	5609900
1158	P63149	P63149	Ubiquitin-conjugating enzyme E2 B	Ube2b	sp|P63149|UBE2B_RAT Ubiquitin-conjugating enzyme E2 B OS=Rattus norvegicus OX=10116 GN=Ube2b PE=2 SV=1	36.8	17.312	55732	0	0	67383	107560	129070	38755	97300	47463	0	58628	86448	0	22798	46453	0
1159	P63159	P63159	High mobility group protein B1	Hmgb1	sp|P63159|HMGB1_RAT High mobility group protein B1 OS=Rattus norvegicus OX=10116 GN=Hmgb1 PE=1 SV=2	45.1	24.893	3163000	4203300	2635400	3195700	2910200	3181200	3433600	3074600	2590800	5436100	3023000	2857000	3727200	4210100	4193300	3458100
1160	P63170	P63170	Dynein light chain 1, cytoplasmic	Dynll1	sp|P63170|DYL1_RAT Dynein light chain 1, cytoplasmic OS=Rattus norvegicus OX=10116 GN=Dynll1 PE=1 SV=1	64	10.366	1847500	2128400	3404500	1668500	1875600	1634700	1737700	1809800	1723000	2313700	1564700	1544300	1685700	2049900	2082500	1660900
1161	P63174	P63174	60S ribosomal protein L38	Rpl38	sp|P63174|RL38_RAT 60S ribosomal protein L38 OS=Rattus norvegicus OX=10116 GN=Rpl38 PE=1 SV=2	50	8.2178	235610	68511	0	350990	346790	309620	237870	296240	279890	40230	247210	407660	315060	0	113610	408440
1162	P63219	P63219	Guanine nucleotide-binding protein G(I)/G(S)/G(O) subunit gamma-5	Gng5	sp|P63219|GBG5_RAT Guanine nucleotide-binding protein G(I)/G(S)/G(O) subunit gamma-5 OS=Rattus norvegicus OX=10116 GN=Gng5 PE=3 SV=1	32.4	7.3184	113880	224130	182880	167430	131800	129410	120670	121960	0	263580	163840	168020	178400	217000	210110	123770
1163	P63245	P63245	Guanine nucleotide-binding protein subunit beta-2-like 1;Guanine nucleotide-binding protein subunit beta-2-like 1, N-terminally processed	Gnb2l1	sp|P63245|RACK1_RAT Receptor of activated protein C kinase 1 OS=Rattus norvegicus OX=10116 GN=Rack1 PE=1 SV=3	73.8	35.076	2977300	2263200	1513300	2603200	2012500	2472800	2145900	2516900	2980800	2324000	2506200	2602200	2651700	2125400	2636400	2829700
1164	P63249	P63249	cAMP-dependent protein kinase inhibitor alpha	Pkia	sp|P63249|IPKA_RAT cAMP-dependent protein kinase inhibitor alpha OS=Rattus norvegicus OX=10116 GN=Pkia PE=1 SV=2	93.4	7.9604	651810	763770	766270	413190	512790	454570	676350	494000	449030	275370	146640	128230	199910	320760	133940	198390
1165	P63251	P63251	G protein-activated inward rectifier potassium channel 1	Kcnj3	sp|P63251|KCNJ3_RAT G protein-activated inward rectifier potassium channel 1 OS=Rattus norvegicus OX=10116 GN=Kcnj3 PE=1 SV=1	3	56.573	0	0	0	0	0	0	0	0	0	0	0	0	6024000	0	0	0
1166	P63255	P63255	Cysteine-rich protein 1	Crip1	sp|P63255|CRIP1_RAT Cysteine-rich protein 1 OS=Rattus norvegicus OX=10116 GN=Crip1 PE=1 SV=2	49.4	8.5497	111700	172740	152090	109500	122390	125960	103020	93093	96732	147560	106400	72241	73943	139480	106710	74399
1167	P63259	P63259	Actin, cytoplasmic 2;Actin, cytoplasmic 2, N-terminally processed	Actg1	sp|P63259|ACTG_RAT Actin, cytoplasmic 2 OS=Rattus norvegicus OX=10116 GN=Actg1 PE=1 SV=1	84.3	41.792	4049500	3442900	13564000	3190900	4502000	3120700	3241600	4940400	4626700	4055500	2559400	2716700	2539800	3706100	2767500	3122500
1168	P63269	P63269	Actin, gamma-enteric smooth muscle	Actg2	sp|P63269|ACTH_RAT Actin, gamma-enteric smooth muscle OS=Rattus norvegicus OX=10116 GN=Actg2 PE=2 SV=1	80.3	41.876	0	0	0	0	0	0	0	0	0	0	0	0	0	0	0	69587
1169	17;498118;498119;498120;498121;498122;498123;498124;498125;498126;498127;498128;498129;498130;498131;498132;498133;498134;498135;498136;498137;498138;498139;498140;498141;498142;498143;498144;498145;498146;498147;498148;498149;498150;498151;498152;498153;498154;498155;498156;498157;498158;498159;498160;498161;498162;498163;498164;498165;498166;498167;498168;498169;498170;498171;498172;498173;4981…	10616;10617;10618;10619;10620;10621;10622;10623;10624;10625;10626;10627;10628;10629;10630;10631;10632;10633;10634;10635;10636;30336;30337;30338;30339;30340;30341;30342;30343;30344;30345;30346;30347;30348;30349;30350;30351;30352;30353;30354;30355;30356;30357;30358;30359;30360;30361;30362;30363;30364;30365;30366;30367;30368;30369;30370;30371;30372;30373;30374;30375;30376;30377;30378;30379;30380;303…	45;48;83;177;191;228;270;284;306;314;326	156;161;167;170;230;301;304;305	-1
1170	P63281	P63281	SUMO-conjugating enzyme UBC9	Ube2i	sp|P63281|UBC9_RAT SUMO-conjugating enzyme UBC9 OS=Rattus norvegicus OX=10116 GN=Ube2i PE=1 SV=1	8.2	18.007	0	159300	26775	0	0	104300	100340	58573	99668	162130	0	68687	0	60952	97324	0
1171	P63312;CON__P21752	P63312	Thymosin beta-10	Tmsb10	sp|P63312|TYB10_RAT Thymosin beta-10 OS=Rattus norvegicus OX=10116 GN=Tmsb10 PE=1 SV=2	68.2	5.0256	1389000	1564200	2797900	1179600	1028200	1092400	1422700	1130000	1076000	1537300	989770	1076700	1447700	1545000	1114100	1035700
1172	P63322	P63322	Ras-related protein Ral-A	Rala	sp|P63322|RALA_RAT Ras-related protein Ral-A OS=Rattus norvegicus OX=10116 GN=Rala PE=1 SV=1	38.3	23.553	778140	938780	935910	912350	891390	961240	956110	841170	964220	319590	1121900	964160	1151300	1050400	1124700	866340
1173	P63324	P63324	40S ribosomal protein S12	Rps12	sp|P63324|RS12_RAT 40S ribosomal protein S12 OS=Rattus norvegicus OX=10116 GN=Rps12 PE=1 SV=2	62.9	14.525	9327700	10038000	14780000	8168600	7554800	7662300	8105800	7297400	6523900	11918000	8802000	8187100	8378300	9304600	8735200	8767300
1174	P63326	P63326	40S ribosomal protein S10	Rps10	sp|P63326|RS10_RAT 40S ribosomal protein S10 OS=Rattus norvegicus OX=10116 GN=Rps10 PE=2 SV=1	37.6	18.916	1062800	678650	707630	898410	805070	928720	904810	959290	1366500	819950	956670	1151600	1006100	824160	1019300	1060800
1175	P63329;P63329-2	P63329;P63329-2	Serine/threonine-protein phosphatase 2B catalytic subunit alpha isoform	Ppp3ca	sp|P63329|PP2BA_RAT Serine/threonine-protein phosphatase 2B catalytic subunit alpha isoform OS=Rattus norvegicus OX=10116 GN=Ppp3ca PE=1 SV=1;sp|P63329-2|PP2BA_RAT Isoform 2 of Serine/threonine-protein phosphatase 2B catalytic subunit alpha isoform OS=Ratt	45.5	58.643	747060	706950	984620	908390	776640	898490	774940	710800	798230	730660	931910	902340	857780	730480	840980	790060
1176	P67779	P67779	Prohibitin	Phb	sp|P67779|PHB_RAT Prohibitin OS=Rattus norvegicus OX=10116 GN=Phb PE=1 SV=1	83.8	29.82	14001000	16906000	34917000	14163000	16443000	13537000	12931000	15886000	16569000	20264000	18721000	17243000	16034000	18873000	17860000	14919000
1177	P67874	P67874	Casein kinase II subunit beta	Csnk2b	sp|P67874|CSK2B_RAT Casein kinase II subunit beta OS=Rattus norvegicus OX=10116 GN=Csnk2b PE=1 SV=1	34	24.942	606800	774650	1449300	395340	413910	541740	513970	688950	706530	1520400	679030	588860	586910	819300	587300	579390
1178	P67999-2;P67999	P67999-2;P67999	Ribosomal protein S6 kinase beta-1	Rps6kb1	sp|P67999-2|KS6B1_RAT Isoform Alpha II of Ribosomal protein S6 kinase beta-1 OS=Rattus norvegicus OX=10116 GN=Rps6kb1;sp|P67999|KS6B1_RAT Ribosomal protein S6 kinase beta-1 OS=Rattus norvegicus OX=10116 GN=Rps6kb1 PE=1 SV=1	5.2	56.159	0	0	0	79291	0	0	86635	0	0	0	97362	0	0	0	88786	84768
1179	P68035	P68035	Actin, alpha cardiac muscle 1	Actc1	sp|P68035|ACTC_RAT Actin, alpha cardiac muscle 1 OS=Rattus norvegicus OX=10116 GN=Actc1 PE=2 SV=1	84.4	42.019	513590000	489330000	572510000	459240000	593370000	487020000	486650000	474840000	573900000	392330000	445880000	452430000	400340000	495110000	423240000	444410000
1180	16;486517;486518;486519;486520;486521;486522;486523;486524;486525;486526;486527;486528;486529;486530;486531;486532;486533;486534;486535;486536;486537;486538;486539;486540;486541;486542;486543;486544;486545;486546;486547;486548;486549;486550;486551;486552;486553;486554;486555;486556;486557;486558;486559;486560;486561;486562;486563;486564;486565;486566;486567;486568;486569;486570;486571;486572;4865…	10616;10617;10618;10619;10620;10621;10622;10623;10624;10625;10626;10627;10628;10629;10630;10631;10632;10633;10634;10635;10636;30336;30337;30338;30339;30340;30341;30342;30343;30344;30345;30346;30347;30348;30349;30350;30351;30352;30353;30354;30355;30356;30357;30358;30359;30360;30361;30362;30363;30364;30365;30366;30367;30368;30369;30370;30371;30372;30373;30374;30375;30376;30377;30378;30379;30380;303…	46;49;84;178;192;229;271;285;307;315;327	91;157;162;168;171;231;302;305;306	-1
1181	P68101	P68101	Eukaryotic translation initiation factor 2 subunit 1	Eif2s1	sp|P68101|IF2A_RAT Eukaryotic translation initiation factor 2 subunit 1 OS=Rattus norvegicus OX=10116 GN=Eif2s1 PE=1 SV=2	54.6	36.108	1274600	1495800	2530200	1059900	1012900	1190400	1178900	1120700	1479700	1602600	1325800	1157500	1370000	1315200	1433200	1183800
1182	P68136	P68136	Actin, alpha skeletal muscle	Acta1	sp|P68136|ACTS_RAT Actin, alpha skeletal muscle OS=Rattus norvegicus OX=10116 GN=Acta1 PE=1 SV=1	84.1	42.051	19052000	22972000	18850000	14260000	21679000	18287000	19658000	19742000	16812000	18642000	13034000	11567000	11880000	16276000	12572000	11594000
1183	74;498275;498276;498277;498278;498279;498280;498281;498282;498283;498284;498285;498286;498287;498288;498289;498290;498291;498292;498293;498294;498295;498296;498297;498298;498299;498300;498301;498302;498303;498304;498305;498306;498307;498308;498309;498310;498311;498312;498313;498314;498315;498316;498317;498318;498319;498320;498321;498322;498323;498324;498325;498326;498327;498328;498329;498330;4983…	10616;10617;10618;10619;10620;10621;10622;10623;10624;10625;10626;10627;10628;10629;10630;10631;10632;10633;10634;10635;10636;30336;30337;30338;30339;30340;30341;30342;30343;30344;30345;30346;30347;30348;30349;30350;30351;30352;30353;30354;30355;30356;30357;30358;30359;30360;30361;30362;30363;30364;30365;30366;30367;30368;30369;30370;30371;30372;30373;30374;30375;30376;30377;30378;30379;30380;303…	46;49;84;178;192;229;271;285;301;307;315;327	91;157;162;168;171;231	-1
1184	P68182	P68182	cAMP-dependent protein kinase catalytic subunit beta	Prkacb	sp|P68182|KAPCB_RAT cAMP-dependent protein kinase catalytic subunit beta OS=Rattus norvegicus OX=10116 GN=Prkacb PE=1 SV=2	31.6	40.707	93648	96597	0	100510	91976	106080	102000	83084	182820	251390	97981	102950	97690	280880	101370	101900
1185	P68255	P68255	14-3-3 protein theta	Ywhaq	sp|P68255|1433T_RAT 14-3-3 protein theta OS=Rattus norvegicus OX=10116 GN=Ywhaq PE=1 SV=1	76.3	27.778	1664000	2056700	3180200	1431900	1185100	1391900	1672400	1447800	1329800	1614500	1565100	1371500	1468200	1697600	1679100	1390000
1186	P68370	P68370	Tubulin alpha-1A chain	Tuba1a	sp|P68370|TBA1A_RAT Tubulin alpha-1A chain OS=Rattus norvegicus OX=10116 GN=Tuba1a PE=1 SV=1	81.2	50.135	301330	613170	179620	714700	448910	910370	892390	621460	497180	876210	596100	582570	687390	876000	948900	569440
1187	P68511	P68511	14-3-3 protein eta	Ywhah	sp|P68511|1433F_RAT 14-3-3 protein eta OS=Rattus norvegicus OX=10116 GN=Ywhah PE=1 SV=2	70.7	28.211	7742200	9909500	14419000	8135400	8320400	8504000	8079100	8060000	7414000	10027000	6654500	6117800	7081400	8896000	7651200	6581100
1188	P69735	P69735	Rab3 GTPase-activating protein catalytic subunit	Rab3gap1	sp|P69735|RB3GP_RAT Rab3 GTPase-activating protein catalytic subunit (Fragments) OS=Rattus norvegicus OX=10116 GN=Rab3gap1 PE=1 SV=2	9.4	86.586	79656	109180	166040	59798	77215	0	74948	86342	36621	0	95297	76437	110960	0	60035	70678
1189	P69736	P69736	Endothelial differentiation-related factor 1	Edf1	sp|P69736|EDF1_RAT Endothelial differentiation-related factor 1 OS=Rattus norvegicus OX=10116 GN=Edf1 PE=1 SV=1	23.6	16.369	220900	426920	519170	232070	224060	229260	231660	192940	328110	476970	278650	202460	298940	338440	319660	243440
1190	P69897;P69897-2	P69897;P69897-2	Tubulin beta-5 chain	Tubb5	sp|P69897|TBB5_RAT Tubulin beta-5 chain OS=Rattus norvegicus OX=10116 GN=Tubb5 PE=1 SV=1;sp|P69897-2|TBB5_RAT Isoform 2 of Tubulin beta-5 chain OS=Rattus norvegicus OX=10116 GN=Tubb5	80	49.67	9537200	11505000	14060000	7883300	9075200	8979800	9943100	9788000	9771200	11776000	7865800	7510200	8988000	8748600	8631600	6833100
1191	P70470	P70470	Acyl-protein thioesterase 1	Lypla1	sp|P70470|LYPA1_RAT Acyl-protein thioesterase 1 OS=Rattus norvegicus OX=10116 GN=Lypla1 PE=1 SV=1	54.8	24.708	1487700	1231200	1239700	1521900	1378500	1365500	1447600	1257300	1436000	1225600	1170400	1301000	1289900	1476400	1066000	1357000
1192	P70473	P70473	Alpha-methylacyl-CoA racemase	Amacr	sp|P70473|AMACR_RAT Alpha-methylacyl-CoA racemase OS=Rattus norvegicus OX=10116 GN=Amacr PE=1 SV=3	24.9	41.828	367060	309110	419840	364040	301200	289970	264980	371790	196140	0	259080	332000	107170	0	263940	233330
1193	P70483	P70483	Striatin	Strn	sp|P70483|STRN_RAT Striatin OS=Rattus norvegicus OX=10116 GN=Strn PE=1 SV=1	28.3	86.225	578310	662150	1485700	531550	706220	613020	552760	552850	908720	1179000	716070	721240	794130	799340	802550	578280
1194	P70490	P70490	Lactadherin	Mfge8	sp|P70490|MFGM_RAT Lactadherin OS=Rattus norvegicus OX=10116 GN=Mfge8 PE=2 SV=1	13.1	47.412	168200	149550	0	122680	116910	110870	96322	101730	157030	149350	145160	118470	156250	92385	142230	101810
1195	P70500	P70500	CDP-diacylglycerol--inositol 3-phosphatidyltransferase	Cdipt	sp|P70500|CDIPT_RAT CDP-diacylglycerol--inositol 3-phosphatidyltransferase OS=Rattus norvegicus OX=10116 GN=Cdipt PE=1 SV=1	9.9	23.613	0	0	0	175330	196850	201340	264180	168610	293880	0	338270	252600	300520	246650	0	208150
1196	P70501	P70501	RNA-binding protein 10	Rbm10	sp|P70501|RBM10_RAT RNA-binding protein 10 OS=Rattus norvegicus OX=10116 GN=Rbm10 PE=1 SV=1	9.4	94.387	45817	51627	112940	0	0	46905	0	0	0	36279	79383	0	69195	0	101920	0
1197	P70531	P70531	Eukaryotic elongation factor 2 kinase	Eef2k	sp|P70531|EF2K_RAT Eukaryotic elongation factor 2 kinase OS=Rattus norvegicus OX=10116 GN=Eef2k PE=1 SV=1	4.6	81.488	0	0	0	0	0	0	0	0	0	0	0	0	0	0	45124	0
1198	P70541	P70541	Translation initiation factor eIF-2B subunit gamma	Eif2b3	sp|P70541|EI2BG_RAT Translation initiation factor eIF-2B subunit gamma OS=Rattus norvegicus OX=10116 GN=Eif2b3 PE=2 SV=2	15.7	50.435	311270	310620	442340	278060	207260	236630	308640	433640	613280	332720	297920	299970	67616	346710	226130	303260
1199	P70563-2;P70563	P70563-2;P70563	Nucleoside diphosphate-linked moiety X motif 6	Nudt6	sp|P70563-2|NUDT6_RAT Isoform 2 of Nucleoside diphosphate-linked moiety X motif 6 OS=Rattus norvegicus OX=10116 GN=Nudt6;sp|P70563|NUDT6_RAT Nucleoside diphosphate-linked moiety X motif 6 OS=Rattus norvegicus OX=10116 GN=Nudt6 PE=1 SV=1	11.8	27.903	0	0	0	300430	0	0	282890	0	0	0	0	0	0	0	659880	0
1200	P70566	P70566	Tropomodulin-2	Tmod2	sp|P70566|TMOD2_RAT Tropomodulin-2 OS=Rattus norvegicus OX=10116 GN=Tmod2 PE=1 SV=1	23.1	39.491	94346	149300	190300	91471	74480	107940	121780	0	144460	188990	125890	0	134660	131480	122400	87325
1201	P70567	P70567	Tropomodulin-1	Tmod1	sp|P70567|TMOD1_RAT Tropomodulin-1 OS=Rattus norvegicus OX=10116 GN=Tmod1 PE=2 SV=1	56.3	40.48	6558600	8907400	6891900	6574400	6197500	7320600	6986500	5989900	8711900	10908000	8021200	6681700	7543600	9188100	8280200	6292600
1202	P70569;Q9QYF3	P70569;Q9QYF3	Unconventional myosin-Vb;Unconventional myosin-Va	Myo5b;Myo5a	sp|P70569|MYO5B_RAT Unconventional myosin-Vb OS=Rattus norvegicus OX=10116 GN=Myo5b PE=1 SV=1;sp|Q9QYF3|MYO5A_RAT Unconventional myosin-Va OS=Rattus norvegicus OX=10116 GN=Myo5a PE=1 SV=1	0.9	213.72	0	0	0	0	0	0	82722	0	0	0	0	0	0	0	0	0
1203	P70580	P70580	Membrane-associated progesterone receptor component 1	Pgrmc1	sp|P70580|PGRC1_RAT Membrane-associated progesterone receptor component 1 OS=Rattus norvegicus OX=10116 GN=Pgrmc1 PE=1 SV=3	43.6	21.598	286250	195530	169510	233860	260790	200200	223060	247320	270330	343940	340570	409270	406530	331440	338900	275030
1204	P70581-4;P70581;P70581-2;P70581-3	P70581-4;P70581;P70581-2	Nucleoporin p58/p45	Nupl1	sp|P70581-4|NUP58_RAT Isoform H6 of Nucleoporin p58/p45 OS=Rattus norvegicus OX=10116 GN=Nup58;sp|P70581|NUP58_RAT Nucleoporin p58/p45 OS=Rattus norvegicus OX=10116 GN=Nup58 PE=1 SV=1;sp|P70581-2|NUP58_RAT Isoform p45 of Nucleoporin p58/p45 OS=Rattus norve	10.4	48.579	0	391580	298590	198910	174100	0	174650	257550	88493	275000	191210	0	237310	332820	259920	0
1205	P70582	P70582	Nuclear pore complex protein Nup54	Nup54	sp|P70582|NUP54_RAT Nuclear pore complex protein Nup54 OS=Rattus norvegicus OX=10116 GN=Nup54 PE=1 SV=1	8.8	55.744	97580	130880	140290	102170	87255	113250	104550	100200	98083	194570	128370	113470	124870	132910	125160	105470
1206	P70583	P70583	Deoxyuridine 5-triphosphate nucleotidohydrolase	Dut	sp|P70583|DUT_RAT Deoxyuridine 5-triphosphate nucleotidohydrolase OS=Rattus norvegicus OX=10116 GN=Dut PE=2 SV=3	32.2	22.003	430200	538300	1723600	406470	450560	400080	439970	356790	642380	832260	440970	477340	445800	612650	470430	392600
1207	P70584	P70584	Short/branched chain specific acyl-CoA dehydrogenase, mitochondrial	Acadsb	sp|P70584|ACDSB_RAT Short/branched chain specific acyl-CoA dehydrogenase, mitochondrial OS=Rattus norvegicus OX=10116 GN=Acadsb PE=1 SV=1	52.5	47.823	885970	1187600	1772700	923570	841210	933910	1111200	811860	920910	416870	299420	270170	172200	458810	311130	290860
1208	P70587-5;P70587-4;P70587-3;P70587;P70587-2	P70587-5;P70587-4;P70587-3;P70587;P70587-2	Leucine-rich repeat-containing protein 7	Lrrc7	sp|P70587-5|LRRC7_RAT Isoform 5 of Leucine-rich repeat-containing protein 7 OS=Rattus norvegicus OX=10116 GN=Lrrc7;sp|P70587-4|LRRC7_RAT Isoform 4 of Leucine-rich repeat-containing protein 7 OS=Rattus norvegicus OX=10116 GN=Lrrc7;sp|P70587-3|LRRC7_RAT Isof	1.2	158.65	0	0	0	0	0	0	0	0	0	0	0	0	0	0	0	57867
1209	P70615	P70615	Lamin-B1	Lmnb1	sp|P70615|LMNB1_RAT Lamin-B1 OS=Rattus norvegicus OX=10116 GN=Lmnb1 PE=1 SV=3	65.2	66.606	4500200	5859100	8434800	4659500	4611800	4577600	4466800	4260300	4922600	8562200	6329500	5838600	6222000	7001800	7223700	5527800
1210	P70617	P70617	Ninjurin-1	Ninj1	sp|P70617|NINJ1_RAT Ninjurin-1 OS=Rattus norvegicus OX=10116 GN=Ninj1 PE=1 SV=1	18.4	16.539	0	0	0	169760	96984	137500	131470	0	105270	0	149320	54350	159210	110490	131260	122490
1211	P70618;P70618-2	P70618;P70618-2	Mitogen-activated protein kinase 14	Mapk14	sp|P70618|MK14_RAT Mitogen-activated protein kinase 14 OS=Rattus norvegicus OX=10116 GN=Mapk14 PE=1 SV=3;sp|P70618-2|MK14_RAT Isoform 2 of Mitogen-activated protein kinase 14 OS=Rattus norvegicus OX=10116 GN=Mapk14	54.7	41.321	1865300	2037900	2283400	2056900	1827400	2170100	2047000	1805700	1644000	2100700	1996100	2144700	2090700	1853400	2325700	2070000
1212	P70619	P70619	Glutathione reductase	Gsr	sp|P70619|GSHR_RAT Glutathione reductase (Fragment) OS=Rattus norvegicus OX=10116 GN=Gsr PE=2 SV=2	17.2	46.301	222800	172250	556600	182070	169860	147670	181410	190840	171380	115290	187410	198970	154400	148530	142330	151710
1213	P70623;P55054	P70623	Fatty acid-binding protein, adipocyte	Fabp4	sp|P70623|FABP4_RAT Fatty acid-binding protein, adipocyte OS=Rattus norvegicus OX=10116 GN=Fabp4 PE=1 SV=3	81.1	14.708	16108000	16921000	14713000	15540000	17896000	17294000	14634000	17693000	13483000	14832000	15353000	13316000	14474000	12977000	13072000	13106000
1214	P70645	P70645	Bleomycin hydrolase	Blmh	sp|P70645|BLMH_RAT Bleomycin hydrolase OS=Rattus norvegicus OX=10116 GN=Blmh PE=1 SV=1	46.3	52.322	571070	667970	845630	626450	584360	652280	790530	540820	647250	957850	454000	632880	713600	986630	481560	632310
1215	P70673	P70673	ATP-sensitive inward rectifier potassium channel 11	Kcnj11	sp|P70673|KCJ11_RAT ATP-sensitive inward rectifier potassium channel 11 OS=Rattus norvegicus OX=10116 GN=Kcnj11 PE=1 SV=1	6.4	43.607	0	0	0	0	45259	22832	63081	0	62456	0	0	0	0	0	28379	0
1216	P80067	P80067	Dipeptidyl peptidase 1;Dipeptidyl peptidase 1 exclusion domain chain;Dipeptidyl peptidase 1 heavy chain;Dipeptidyl peptidase 1 light chain	Ctsc	sp|P80067|CATC_RAT Dipeptidyl peptidase 1 OS=Rattus norvegicus OX=10116 GN=Ctsc PE=1 SV=3	19	52.235	251800	251520	953960	263350	235270	218580	235050	255230	271350	173640	264220	290710	225290	193930	243670	288030
1217	P80299	P80299	Bifunctional epoxide hydrolase 2;Cytosolic epoxide hydrolase 2;Lipid-phosphate phosphatase	Ephx2	sp|P80299|HYES_RAT Bifunctional epoxide hydrolase 2 OS=Rattus norvegicus OX=10116 GN=Ephx2 PE=1 SV=1	63.9	62.34	6678900	7283100	8036300	7396400	7586400	7501200	7468300	7123000	3010200	5337500	4626100	4547400	7290000	3847200	6530300	4290400
1218	P80385	P80385	5-AMP-activated protein kinase subunit gamma-1	Prkag1	sp|P80385|AAKG1_RAT 5-AMP-activated protein kinase subunit gamma-1 OS=Rattus norvegicus OX=10116 GN=Prkag1 PE=1 SV=3	34.8	37.386	534350	751770	955790	712870	761960	661390	663580	709060	721120	1027000	746510	710760	692830	763070	813410	680330
1219	P80386;Q9QZH4	P80386	5-AMP-activated protein kinase subunit beta-1	Prkab1	sp|P80386|AAKB1_RAT 5-AMP-activated protein kinase subunit beta-1 OS=Rattus norvegicus OX=10116 GN=Prkab1 PE=1 SV=4	27	30.394	353340	245320	187080	313970	321110	330470	338850	420800	442840	389310	350310	382910	394640	349920	377140	421270
1220	P81128	P81128	Rho GTPase-activating protein 35	Arhgap35	sp|P81128|RHG35_RAT Rho GTPase-activating protein 35 OS=Rattus norvegicus OX=10116 GN=Arhgap35 PE=1 SV=3	6.9	170.48	3422100	374820	0	3811800	3470800	1345200	0	0	0	0	213340	0	1241000	0	0	3924500
1221	P81155	P81155	Voltage-dependent anion-selective channel protein 2	Vdac2	sp|P81155|VDAC2_RAT Voltage-dependent anion-selective channel protein 2 OS=Rattus norvegicus OX=10116 GN=Vdac2 PE=1 SV=2	71.9	31.745	14611000	15425000	16674000	15519000	12144000	14855000	14324000	14514000	16814000	17997000	17210000	16781000	15420000	14347000	17046000	15945000
1222	P81795	P81795	Eukaryotic translation initiation factor 2 subunit 3	Eif2s3	sp|P81795|IF2G_RAT Eukaryotic translation initiation factor 2 subunit 3, X-linked OS=Rattus norvegicus OX=10116 GN=Eif2s3 PE=1 SV=2	39	51.079	1069300	1566000	1684700	1098900	987960	1118500	1139700	973210	1285000	1876400	1193900	1020200	1285800	1434800	1333600	1112600
1223	P81799	P81799	N-acetyl-D-glucosamine kinase	Nagk	sp|P81799|NAGK_RAT N-acetyl-D-glucosamine kinase OS=Rattus norvegicus OX=10116 GN=Nagk PE=1 SV=4	21.6	37.196	126600	136410	262690	105510	87703	105760	140290	147250	63475	115300	128720	118840	117940	119350	103130	110350
1224	P82471	P82471	Guanine nucleotide-binding protein G(q) subunit alpha	Gnaq	sp|P82471|GNAQ_RAT Guanine nucleotide-binding protein G(q) subunit alpha OS=Rattus norvegicus OX=10116 GN=Gnaq PE=2 SV=2	28.7	42.144	354550	333090	718220	286800	297160	279260	359460	267450	338910	366600	444570	393610	410380	417770	405680	393480
1225	P82808	P82808	Glutamine--fructose-6-phosphate aminotransferase [isomerizing] 1	Gfpt1	sp|P82808|GFPT1_RAT Glutamine--fructose-6-phosphate aminotransferase [isomerizing] 1 OS=Rattus norvegicus OX=10116 GN=Gfpt1 PE=1 SV=3	4.1	76.826	0	0	0	0	0	0	0	0	0	0	0	0	0	0	0	15353
1226	P82995	P82995	Heat shock protein HSP 90-alpha	Hsp90aa1	sp|P82995|HS90A_RAT Heat shock protein HSP 90-alpha OS=Rattus norvegicus OX=10116 GN=Hsp90aa1 PE=1 SV=3	60.4	84.814	7729800	6478200	4198600	6300100	6636600	7171500	6669600	7085800	5828300	4023600	5000300	4756400	4709900	4611800	4690800	4738600
1227	P83565	P83565	39S ribosomal protein L40, mitochondrial	Mrpl40	sp|P83565|RM40_RAT 39S ribosomal protein L40, mitochondrial OS=Rattus norvegicus OX=10116 GN=Mrpl40 PE=1 SV=2	45.6	24.397	605030	710800	910150	566530	543440	705200	561320	475840	693120	662860	621500	611750	752980	752200	495700	558570
1228	P83732	P83732	60S ribosomal protein L24	Rpl24	sp|P83732|RL24_RAT 60S ribosomal protein L24 OS=Rattus norvegicus OX=10116 GN=Rpl24 PE=2 SV=1	29.3	17.779	2069600	2003800	3666800	1773000	1951400	1702000	1712900	1515700	1963700	2204700	1796600	1656600	1874100	2399900	1881600	1759400
1229	P83868	P83868	Prostaglandin E synthase 3	Ptges3	sp|P83868|TEBP_RAT Prostaglandin E synthase 3 OS=Rattus norvegicus OX=10116 GN=Ptges3 PE=1 SV=2	36.9	18.721	461380	450770	278220	355750	264000	316740	305190	426880	355080	448360	319880	279490	345740	306440	376500	317840
1230	P83871	P83871	PHD finger-like domain-containing protein 5A	Phf5a	sp|P83871|PHF5A_RAT PHD finger-like domain-containing protein 5A OS=Rattus norvegicus OX=10116 GN=Phf5a PE=2 SV=1	26.4	12.405	23380	47825	62861	24674	18014	24735	19903	19081	0	65920	28292	13886	37308	0	41933	0
1231	P83883	P83883	60S ribosomal protein L36a	Rpl36a	sp|P83883|RL36A_RAT 60S ribosomal protein L36a OS=Rattus norvegicus OX=10116 GN=Rpl36a PE=1 SV=2	8.5	12.441	0	0	0	0	0	0	0	0	0	0	0	0	0	0	0	50943
1232	P83888	P83888	Tubulin gamma-1 chain	Tubg1	sp|P83888|TBG1_RAT Tubulin gamma-1 chain OS=Rattus norvegicus OX=10116 GN=Tubg1 PE=2 SV=1	23.5	51.1	86392	93981	0	92752	96530	143680	98022	115940	142510	67266	96394	100820	115360	0	174780	84690
1233	P83941	P83941	Transcription elongation factor B polypeptide 1	Tceb1	sp|P83941|ELOC_RAT Elongin-C OS=Rattus norvegicus OX=10116 GN=Eloc PE=1 SV=1	56.2	12.473	2469200	2662500	4158600	2166800	2620000	2332000	2437900	2262900	2340800	3513400	2787300	2443400	2590900	3068100	2679200	2341500
1234	P83953;Q56R16	P83953	Importin subunit alpha-5;Importin subunit alpha-5, N-terminally processed	Kpna1	sp|P83953|IMA5_RAT Importin subunit alpha-5 OS=Rattus norvegicus OX=10116 GN=Kpna1 PE=1 SV=1	27.3	60.136	202410	106060	88706	215400	190810	242810	189450	264060	193790	240120	160670	185660	179550	181400	162880	172020
1235	P84060	P84060	Dystrobrevin beta	Dtnb	sp|P84060|DTNB_RAT Dystrobrevin beta OS=Rattus norvegicus OX=10116 GN=Dtnb PE=1 SV=2	6.4	73.877	498000	562720	711010	518670	518130	534270	528290	473710	564930	530110	581520	532210	539380	525250	534110	495100
1236	P84076;Q5PQN0	P84076;Q5PQN0	Neuron-specific calcium-binding protein hippocalcin;Neurocalcin-delta	Hpca;Ncald	sp|P84076|HPCA_RAT Neuron-specific calcium-binding protein hippocalcin OS=Rattus norvegicus OX=10116 GN=Hpca PE=1 SV=2;sp|Q5PQN0|NCALD_RAT Neurocalcin-delta OS=Rattus norvegicus OX=10116 GN=Ncald PE=1 SV=3	10.4	22.427	0	103840	212690	0	0	0	94262	0	97707	69839	107500	99505	128850	86842	142850	88652
1237	P84083	P84083	ADP-ribosylation factor 5	Arf5	sp|P84083|ARF5_RAT ADP-ribosylation factor 5 OS=Rattus norvegicus OX=10116 GN=Arf5 PE=1 SV=2	65.6	20.529	312520	379670	242220	307390	269570	274700	310330	339120	319890	498940	285710	303300	325360	357560	341790	335920
1238	P84092	P84092	AP-2 complex subunit mu	Ap2m1	sp|P84092|AP2M1_RAT AP-2 complex subunit mu OS=Rattus norvegicus OX=10116 GN=Ap2m1 PE=1 SV=1	31.5	49.654	653000	594470	819900	628670	554540	672430	636750	533260	695710	635070	730930	700850	780760	451550	770670	632120
1239	P84100	P84100	60S ribosomal protein L19	Rpl19	sp|P84100|RL19_RAT 60S ribosomal protein L19 OS=Rattus norvegicus OX=10116 GN=Rpl19 PE=1 SV=1	27.6	23.466	914380	1112700	1790800	851350	816710	856630	869290	803350	898270	1376200	1219900	1018000	1142900	1201000	1332700	927920
1240	P84245	P84245	Histone H3.3	H3f3b	sp|P84245|H33_RAT Histone H3.3 OS=Rattus norvegicus OX=10116 GN=H3-3b PE=1 SV=2	51.5	15.328	13633000	6370300	7414100	12921000	18442000	14410000	11954000	13683000	11645000	2436900	9396800	20664000	11348000	6982500	11288000	14907000
1241	P84586;D4AE41	P84586;D4AE41	RNA-binding motif protein, X chromosome retrogene-like;RNA-binding motif protein, X chromosome retrogene-like, N-terminally processed;RNA binding motif protein, X-linked-like-1	Rbmxrtl;Rbmxl1	sp|P84586|RMXRL_RAT RNA-binding motif protein, X chromosome retrogene-like OS=Rattus norvegicus OX=10116 GN=Rbmxrtl PE=1 SV=1;sp|D4AE41|RMXL1_RAT RNA binding motif protein, X-linked-like-1 OS=Rattus norvegicus OX=10116 GN=Rbmxl1 PE=3 SV=1	29.9	42.203	799350	775810	642640	855730	690270	849910	696140	860940	706500	1001800	962050	1094700	1113400	743120	1153400	943720
1242	P84817;P84817-3;P84817-2	P84817;P84817-3;P84817-2	Mitochondrial fission 1 protein	Fis1	sp|P84817|FIS1_RAT Mitochondrial fission 1 protein OS=Rattus norvegicus OX=10116 GN=Fis1 PE=1 SV=1;sp|P84817-3|FIS1_RAT Isoform 3 of Mitochondrial fission 1 protein OS=Rattus norvegicus OX=10116 GN=Fis1;sp|P84817-2|FIS1_RAT Isoform 2 of Mitochondrial fissi	45.4	16.994	3496600	3925300	9128700	3467000	2780000	3742000	2934000	3469500	3393500	5923200	3822000	3942000	4323300	4968700	4624300	3968800
1243	P84850	P84850	D-2-hydroxyglutarate dehydrogenase, mitochondrial	D2hgdh	sp|P84850|D2HDH_RAT D-2-hydroxyglutarate dehydrogenase, mitochondrial OS=Rattus norvegicus OX=10116 GN=D2hgdh PE=3 SV=1	36.1	58.804	695570	952470	374470	748870	604220	648730	740990	761800	774900	1401500	1126400	865820	999430	1002500	920160	875280
1244	P85007	P85007	Immediate early response 3-interacting protein 1	Ier3ip1	sp|P85007|IR3IP_RAT Immediate early response 3-interacting protein 1 OS=Rattus norvegicus OX=10116 GN=Ier3ip1 PE=3 SV=1	34.1	8.9987	0	201920	0	178850	0	177720	176710	113220	291200	305610	337380	298670	258120	309140	275680	203940
1245	P85108	P85108	Tubulin beta-2A chain	Tubb2a	sp|P85108|TBB2A_RAT Tubulin beta-2A chain OS=Rattus norvegicus OX=10116 GN=Tubb2a PE=1 SV=1	71	49.906	1701700	1803100	2073900	1872800	1930400	1699200	2096800	1791900	1733100	2003300	1441500	1388500	1560500	1679400	1501300	1522700
1246	P85125	P85125	Polymerase I and transcript release factor	Ptrf	sp|P85125|CAVN1_RAT Caveolae-associated protein 1 OS=Rattus norvegicus OX=10116 GN=Cavin1 PE=1 SV=1	53.1	43.908	13986000	17826000	18529000	14988000	15253000	14359000	14681000	13571000	15483000	21136000	16986000	14629000	15785000	17453000	17684000	13660000
1247	P85515	P85515	Alpha-centractin	Actr1a	sp|P85515|ACTZ_RAT Alpha-centractin OS=Rattus norvegicus OX=10116 GN=Actr1a PE=1 SV=1	59.6	42.613	3960500	4568900	5415600	4035300	3470300	3822900	4084300	4110000	3849700	5122300	3908300	3590100	3731300	4403000	4134000	3508000
1248	P85834	P85834	Elongation factor Tu, mitochondrial	Tufm	sp|P85834|EFTU_RAT Elongation factor Tu, mitochondrial OS=Rattus norvegicus OX=10116 GN=Tufm PE=1 SV=1	73.5	49.522	24766000	23116000	19300000	25171000	29089000	25564000	24152000	27354000	28880000	23097000	26713000	28964000	26206000	26428000	23937000	28528000
1249	P85845	P85845	Fascin	Fscn1	sp|P85845|FSCN1_RAT Fascin OS=Rattus norvegicus OX=10116 GN=Fscn1 PE=1 SV=2	47.9	54.49	2060400	2168000	2129200	1817200	1699100	1624200	1657200	1846700	1501200	2087800	1533100	1407600	1778300	1786900	1774900	1436000
1250	P85968	P85968	6-phosphogluconate dehydrogenase, decarboxylating	Pgd	sp|P85968|6PGD_RAT 6-phosphogluconate dehydrogenase, decarboxylating OS=Rattus norvegicus OX=10116 GN=Pgd PE=1 SV=1	35.2	53.236	851130	834480	1055700	836480	896950	814850	856360	932480	971600	1411700	815200	694990	731170	953520	897990	658170
1251	P85970	P85970	Actin-related protein 2/3 complex subunit 2	Arpc2	sp|P85970|ARPC2_RAT Actin-related protein 2/3 complex subunit 2 OS=Rattus norvegicus OX=10116 GN=Arpc2 PE=1 SV=1	54.3	34.391	1635400	1880500	369580	1963200	1920200	2069500	1922700	1861400	1482800	1636600	1923900	1943200	1703900	1327800	1863400	1777600
1252	P85971	P85971	6-phosphogluconolactonase	Pgls	sp|P85971|6PGL_RAT 6-phosphogluconolactonase OS=Rattus norvegicus OX=10116 GN=Pgls PE=1 SV=1	80.9	27.234	3717900	3928400	7258100	3807500	3500200	3589900	3853900	3373600	3476300	3174100	4082500	4123400	4123600	3850900	3975600	3684800
1253	P85972	P85972	Vinculin	Vcl	sp|P85972|VINC_RAT Vinculin OS=Rattus norvegicus OX=10116 GN=Vcl PE=1 SV=1	75.1	116.61	44153000	52170000	85478000	44567000	46526000	42130000	48005000	44187000	46687000	56216000	54991000	50034000	51818000	57439000	53124000	49422000
1254	P85973	P85973	Purine nucleoside phosphorylase	Pnp	sp|P85973|PNPH_RAT Purine nucleoside phosphorylase OS=Rattus norvegicus OX=10116 GN=Pnp PE=1 SV=1	64.4	32.302	1435400	1342800	1110000	1547000	1436400	1681600	1694700	1596000	1654900	1061500	1285800	1422400	1531400	924220	1325500	1681200
1255	P86172	P86172	NmrA-like family domain-containing protein 1	Nmral1	sp|P86172|NMRL1_RAT NmrA-like family domain-containing protein 1 (Fragments) OS=Rattus norvegicus OX=10116 GN=Nmral1 PE=1 SV=1	9.3	16.901	0	0	0	0	0	0	0	0	0	0	0	0	0	0	0	45608
1256	P86182	P86182	Coiled-coil domain-containing protein 22	Ccdc22	sp|P86182|CCD22_RAT Coiled-coil domain-containing protein 22 OS=Rattus norvegicus OX=10116 GN=Ccdc22 PE=1 SV=2	24.9	70.854	134300	281020	351680	85158	115640	128030	196960	109840	189520	408730	184640	91972	196450	322500	231820	65676
1257	P86252	P86252	Transcriptional activator protein Pur-alpha	Pura	sp|P86252|PURA_RAT Transcriptional activator protein Pur-alpha (Fragments) OS=Rattus norvegicus OX=10116 GN=Pura PE=1 SV=1	69.6	15.322	1700900	2397100	2070100	1625200	1391100	1801300	1884700	1292900	1597400	2966100	1692900	1458400	1738100	2223100	2111500	1389500
1258	P97519;D4A5C3	P97519	Hydroxymethylglutaryl-CoA lyase, mitochondrial	Hmgcl	sp|P97519|HMGCL_RAT Hydroxymethylglutaryl-CoA lyase, mitochondrial OS=Rattus norvegicus OX=10116 GN=Hmgcl PE=2 SV=1	51.1	34.191	3178500	3146400	4328800	3080500	3024300	3215500	3259300	2533700	2540200	3532100	3359400	3430300	3492500	2919100	3421700	3177100
1259	P97521	P97521	Mitochondrial carnitine/acylcarnitine carrier protein	Slc25a20	sp|P97521|MCAT_RAT Mitochondrial carnitine/acylcarnitine carrier protein OS=Rattus norvegicus OX=10116 GN=Slc25a20 PE=1 SV=1	64.5	33.154	7909900	8322700	5980600	7842200	6771500	7302800	7405400	7141300	6340100	7982200	8374600	9196700	7254100	7166800	7677800	7984100
1260	P97526	P97526	Neurofibromin	Nf1	sp|P97526|NF1_RAT Neurofibromin OS=Rattus norvegicus OX=10116 GN=Nf1 PE=1 SV=1	2.8	317.08	0	0	0	0	0	872750	935030	0	946280	1033600	0	0	1618100	977520	1206300	0
1261	P97531	P97531	Cdc42-interacting protein 4	Trip10	sp|P97531|CIP4_RAT Cdc42-interacting protein 4 OS=Rattus norvegicus OX=10116 GN=Trip10 PE=1 SV=3	13.3	62.798	181170	130840	223800	239780	174280	192370	188320	439330	129620	0	178470	222510	113610	0	141840	171020
1262	P97532	P97532	3-mercaptopyruvate sulfurtransferase	Mpst	sp|P97532|THTM_RAT 3-mercaptopyruvate sulfurtransferase OS=Rattus norvegicus OX=10116 GN=Mpst PE=1 SV=3	50.5	32.94	4018400	4813200	6548300	3647700	4146500	3771500	3818900	3462600	4121200	3763000	4148400	3265000	3628100	2961100	4005900	3522600
1263	P97534	P97534	Peptidyl-prolyl cis-trans isomerase FKBP1B	Fkbp1b	sp|P97534|FKB1B_RAT Peptidyl-prolyl cis-trans isomerase FKBP1B OS=Rattus norvegicus OX=10116 GN=Fkbp1b PE=1 SV=3	25.9	11.794	0	0	0	299140	308100	0	0	312690	0	0	0	0	373450	306630	371260	321470
1264	P97536	P97536	Cullin-associated NEDD8-dissociated protein 1	Cand1	sp|P97536|CAND1_RAT Cullin-associated NEDD8-dissociated protein 1 OS=Rattus norvegicus OX=10116 GN=Cand1 PE=1 SV=1	37.6	136.36	3230500	3340400	2655500	3030500	2505200	2802100	3310000	2630600	2373500	4121900	3217900	3319900	3188400	3233900	3418800	3315100
1265	P97541	P97541	Heat shock protein beta-6	Hspb6	sp|P97541|HSPB6_RAT Heat shock protein beta-6 OS=Rattus norvegicus OX=10116 GN=Hspb6 PE=1 SV=1	95.1	17.505	12164000	14777000	13949000	10028000	8802000	10937000	13514000	11057000	13428000	13717000	7622600	6678700	6100700	13781000	7398000	8705300
1266	P97546	P97546	Neuroplastin	Nptn	sp|P97546|NPTN_RAT Neuroplastin OS=Rattus norvegicus OX=10116 GN=Nptn PE=1 SV=2	4.1	43.931	0	0	0	0	0	0	0	0	0	0	0	0	0	0	16144	0
1267	P97564	P97564	Glycerol-3-phosphate acyltransferase 1, mitochondrial	Gpam	sp|P97564|GPAT1_RAT Glycerol-3-phosphate acyltransferase 1, mitochondrial OS=Rattus norvegicus OX=10116 GN=Gpam PE=1 SV=3	18.5	93.713	485210	356670	318830	386910	377340	392080	451490	292630	492520	966660	670930	661100	764070	640210	878380	624640
1268	P97571	P97571	Calpain-1 catalytic subunit	Capn1	sp|P97571|CAN1_RAT Calpain-1 catalytic subunit OS=Rattus norvegicus OX=10116 GN=Capn1 PE=1 SV=1	22.6	82.118	236230	521360	850160	69916	400460	298310	255480	384220	276310	374280	274240	273750	275950	204790	55216	0
1269	P97576	P97576	GrpE protein homolog 1, mitochondrial	Grpel1	sp|P97576|GRPE1_RAT GrpE protein homolog 1, mitochondrial OS=Rattus norvegicus OX=10116 GN=Grpel1 PE=1 SV=2	66.8	24.297	2580000	3168500	2402000	2431900	2377100	2996600	2442200	2280600	3280300	3124700	2982900	2636900	2916100	3017100	2769200	2632900
1270	P97584;REV__Q5BK06	P97584	Prostaglandin reductase 1	Ptgr1	sp|P97584|PTGR1_RAT Prostaglandin reductase 1 OS=Rattus norvegicus OX=10116 GN=Ptgr1 PE=1 SV=3	55	35.718	1811300	2314800	2135500	2259200	2293300	2156500	2064500	1820000	2401600	4437800	4237700	3644300	4081500	3755100	3798600	3439500
1271	P97588;Q9R1V3	P97588	Mothers against decapentaplegic homolog 1	Smad1	sp|P97588|SMAD1_RAT Mothers against decapentaplegic homolog 1 OS=Rattus norvegicus OX=10116 GN=Smad1 PE=2 SV=1	9	52.713	0	0	0	0	0	0	83231	0	44869	0	0	0	0	0	0	0
1272	P97603	P97603	Neogenin	Neo1	sp|P97603|NEO1_RAT Neogenin (Fragment) OS=Rattus norvegicus OX=10116 GN=Neo1 PE=1 SV=1	2.8	150.64	0	0	0	0	0	0	90268	0	88995	0	0	0	125010	0	75633	0
1273	P97608	P97608	5-oxoprolinase	Oplah	sp|P97608|OPLA_RAT 5-oxoprolinase OS=Rattus norvegicus OX=10116 GN=Oplah PE=1 SV=2	22.1	137.72	543890	615240	958260	527140	481450	489690	585370	460220	650840	876660	879670	707230	874960	914490	790440	691290
1274	P97612	P97612	Fatty-acid amide hydrolase 1	Faah	sp|P97612|FAAH1_RAT Fatty-acid amide hydrolase 1 OS=Rattus norvegicus OX=10116 GN=Faah PE=1 SV=1	10.7	63.356	0	0	0	0	0	0	0	0	0	70126	76039	0	88232	102100	89992	61144
1275	P97615	P97615	Thioredoxin, mitochondrial	Txn2	sp|P97615|THIOM_RAT Thioredoxin, mitochondrial OS=Rattus norvegicus OX=10116 GN=Txn2 PE=2 SV=1	41.6	18.232	208370	188480	224340	154810	219990	163170	172170	271640	135470	146700	84275	116280	167010	170620	67486	209820
1276	P97629	P97629	Leucyl-cystinyl aminopeptidase	Lnpep	sp|P97629|LCAP_RAT Leucyl-cystinyl aminopeptidase OS=Rattus norvegicus OX=10116 GN=Lnpep PE=1 SV=1	27.1	117.2	1154700	1354000	1773600	1124500	1019000	1102500	1240200	1001300	1081500	1743500	1410900	1221400	1305800	1430900	1394200	1268900
1277	P97633;P97633-2	P97633;P97633-2	Casein kinase I isoform alpha	Csnk1a1	sp|P97633|KC1A_RAT Casein kinase I isoform alpha OS=Rattus norvegicus OX=10116 GN=Csnk1a1 PE=2 SV=1;sp|P97633-2|KC1A_RAT Isoform 2 of Casein kinase I isoform alpha OS=Rattus norvegicus OX=10116 GN=Csnk1a1	28.9	37.495	181200	239210	302470	210200	152210	205770	165080	200990	307710	312460	262400	216900	222970	207600	338570	224540
1278	P97675	P97675	Ectonucleotide pyrophosphatase/phosphodiesterase family member 3;Alkaline phosphodiesterase I;Nucleotide pyrophosphatase	Enpp3	sp|P97675|ENPP3_RAT Ectonucleotide pyrophosphatase/phosphodiesterase family member 3 OS=Rattus norvegicus OX=10116 GN=Enpp3 PE=1 SV=2	8	99.071	146760	154740	86936	143100	194190	123150	159820	194760	193080	205240	58384	162970	304830	218980	225450	262210
1279	P97679	P97679	DNA mismatch repair protein Mlh1	Mlh1	sp|P97679|MLH1_RAT DNA mismatch repair protein Mlh1 OS=Rattus norvegicus OX=10116 GN=Mlh1 PE=2 SV=1	5	84.539	0	0	0	0	0	131550	0	0	0	0	191160	0	189930	253630	186510	0
1280	P97686-3;P97686-2;P97686	P97686-3;P97686-2;P97686	Neuronal cell adhesion molecule	Nrcam	sp|P97686-3|NRCAM_RAT Isoform 3 of Neuronal cell adhesion molecule OS=Rattus norvegicus OX=10116 GN=Nrcam;sp|P97686-2|NRCAM_RAT Isoform 2 of Neuronal cell adhesion molecule OS=Rattus norvegicus OX=10116 GN=Nrcam;sp|P97686|NRCAM_RAT Neuronal cell adhesion m	0.8	130.83	0	0	0	0	0	0	0	187790	0	0	0	0	0	0	0	0
1281	P97687	P97687	Ectonucleoside triphosphate diphosphohydrolase 1	Entpd1	sp|P97687|ENTP1_RAT Ectonucleoside triphosphate diphosphohydrolase 1 OS=Rattus norvegicus OX=10116 GN=Entpd1 PE=1 SV=1	9.6	57.407	191910	275820	0	0	0	208580	198240	257860	240840	0	196000	251110	200100	204760	269880	221980
1282	P97690	P97690	Structural maintenance of chromosomes protein 3	Smc3	sp|P97690|SMC3_RAT Structural maintenance of chromosomes protein 3 OS=Rattus norvegicus OX=10116 GN=Smc3 PE=1 SV=1	20	138.45	621600	690280	719600	589560	616150	606990	581940	623520	787450	1041800	726450	675330	893490	872830	910670	665350
1283	P97694	P97694	Cytohesin-1	Cyth1	sp|P97694|CYH1_RAT Cytohesin-1 OS=Rattus norvegicus OX=10116 GN=Cyth1 PE=1 SV=1	15.3	46.273	0	0	0	169960	156300	294580	199390	0	189080	337800	0	149260	0	180960	179870	159060
1284	P97697	P97697	Inositol monophosphatase 1	Impa1	sp|P97697|IMPA1_RAT Inositol monophosphatase 1 OS=Rattus norvegicus OX=10116 GN=Impa1 PE=1 SV=2	36.8	30.511	777610	1049700	2032100	775150	855930	730400	815170	836840	442780	608500	477290	432490	543130	572070	519130	396440
1285	P97700	P97700	Mitochondrial 2-oxoglutarate/malate carrier protein	Slc25a11	sp|P97700|M2OM_RAT Mitochondrial 2-oxoglutarate/malate carrier protein OS=Rattus norvegicus OX=10116 GN=Slc25a11 PE=1 SV=3	58	34.133	10205000	7633500	3555900	9994700	10032000	9348900	9437400	8585500	9869300	7692000	8596100	11198000	9680200	9413500	8976900	9926000
1286	P97829;P97829-2	P97829;P97829-2	Leukocyte surface antigen CD47	Cd47	sp|P97829|CD47_RAT Leukocyte surface antigen CD47 OS=Rattus norvegicus OX=10116 GN=Cd47 PE=1 SV=1;sp|P97829-2|CD47_RAT Isoform 2 of Leukocyte surface antigen CD47 OS=Rattus norvegicus OX=10116 GN=Cd47	7.6	32.995	197720	0	0	0	167480	110770	0	0	0	0	0	0	113160	0	0	0
1287	P97834	P97834	COP9 signalosome complex subunit 1	Gps1	sp|P97834|CSN1_RAT COP9 signalosome complex subunit 1 OS=Rattus norvegicus OX=10116 GN=Gps1 PE=1 SV=1	26.3	53.428	475970	578090	1052500	563600	491520	567840	530330	530150	553720	694030	534780	519090	523670	622690	620650	526120
1288	P97846	P97846	Contactin-associated protein 1	Cntnap1	sp|P97846|CNTP1_RAT Contactin-associated protein 1 OS=Rattus norvegicus OX=10116 GN=Cntnap1 PE=1 SV=1	4	155.87	55701	62081	237240	60523	41977	26883	51479	26189	86225	62745	48548	38090	38345	76690	43809	0
1289	P97849	P97849	Long-chain fatty acid transport protein 1	Slc27a1	sp|P97849|S27A1_RAT Long-chain fatty acid transport protein 1 OS=Rattus norvegicus OX=10116 GN=Slc27a1 PE=2 SV=1	44.3	71.282	1943200	2301400	4599700	2280700	1988100	2149800	2033200	1937500	2638000	4183100	2847200	3144500	2835500	3101600	3401200	2915300
1290	P97852	P97852	Peroxisomal multifunctional enzyme type 2;(3R)-hydroxyacyl-CoA dehydrogenase;Enoyl-CoA hydratase 2	Hsd17b4	sp|P97852|DHB4_RAT Peroxisomal multifunctional enzyme type 2 OS=Rattus norvegicus OX=10116 GN=Hsd17b4 PE=1 SV=3	48.6	79.427	2254000	2599800	2449600	2493800	1863100	2210300	1835700	2060600	2156500	3108900	2281500	2440900	2829600	2761200	3136000	2158000
1291	P97874	P97874	Cyclin-G-associated kinase	Gak	sp|P97874|GAK_RAT Cyclin-G-associated kinase OS=Rattus norvegicus OX=10116 GN=Gak PE=1 SV=1	5.6	143.7	65656	71420	140410	96131	87124	95969	0	0	0	82897	69672	89007	75411	105450	99226	89532
1292	P97878	P97878	Exocyst complex component 5	Exoc5	sp|P97878|EXOC5_RAT Exocyst complex component 5 OS=Rattus norvegicus OX=10116 GN=Exoc5 PE=1 SV=1	4	81.736	80726	92985	142930	72827	63966	57051	0	0	0	95765	90481	82788	84351	69736	0	65625
1293	P97887;O88777	P97887;O88777	Presenilin-1;Presenilin-1 NTF subunit;Presenilin-1 CTF subunit;Presenilin-1 CTF12;Presenilin-2;Presenilin-2 NTF subunit;Presenilin-2 CTF subunit	Psen1;Psen2	sp|P97887|PSN1_RAT Presenilin-1 OS=Rattus norvegicus OX=10116 GN=Psen1 PE=1 SV=1;sp|O88777|PSN2_RAT Presenilin-2 OS=Rattus norvegicus OX=10116 GN=Psen2 PE=1 SV=2	6	52.789	0	0	0	0	0	0	0	0	0	0	0	0	0	0	0	43599
1294	P97924-7;P97924;P97924-4;Q6P720;P97924-5;P97924-6;P97924-3;P97924-2	P97924-7;P97924;P97924-4	Kalirin	Kalrn	sp|P97924-7|KALRN_RAT Isoform 7 of Kalirin OS=Rattus norvegicus OX=10116 GN=Kalrn;sp|P97924|KALRN_RAT Kalirin OS=Rattus norvegicus OX=10116 GN=Kalrn PE=1 SV=3;sp|P97924-4|KALRN_RAT Isoform 4 of Kalirin OS=Rattus norvegicus OX=10116 GN=Kalrn	4.1	271.35	267890	688660	0	204510	175990	203970	243810	143240	183150	351180	269600	366690	326980	265750	0	176140
1295	P98166	P98166	Very low-density lipoprotein receptor	Vldlr	sp|P98166|VLDLR_RAT Very low-density lipoprotein receptor OS=Rattus norvegicus OX=10116 GN=Vldlr PE=2 SV=1	17	96.541	230450	244380	248810	256240	208230	310390	212650	243910	258410	356710	277480	286050	257050	237250	299790	215050
1296	Q00438-2;Q00438	Q00438-2;Q00438	Polypyrimidine tract-binding protein 1	Ptbp1	sp|Q00438-2|PTBP1_RAT Isoform PYBP1 of Polypyrimidine tract-binding protein 1 OS=Rattus norvegicus OX=10116 GN=Ptbp1;sp|Q00438|PTBP1_RAT Polypyrimidine tract-binding protein 1 OS=Rattus norvegicus OX=10116 GN=Ptbp1 PE=1 SV=1	51.9	56.936	3781900	3809100	3301500	3240500	3065600	3205200	3756000	2924000	3832300	5101800	4200200	3835900	4190100	4714000	4668000	3249500
1297	Q00566-2;Q00566	Q00566-2;Q00566	Methyl-CpG-binding protein 2	Mecp2	sp|Q00566-2|MECP2_RAT Isoform B of Methyl-CpG-binding protein 2 OS=Rattus norvegicus OX=10116 GN=Mecp2;sp|Q00566|MECP2_RAT Methyl-CpG-binding protein 2 OS=Rattus norvegicus OX=10116 GN=Mecp2 PE=1 SV=1	32.1	55.082	895610	1389000	2117800	847560	774480	895430	992560	627020	913430	2008500	1273000	1134800	1212600	1449100	1368700	1031000
1298	Q00657	Q00657	Chondroitin sulfate proteoglycan 4	Cspg4	sp|Q00657|CSPG4_RAT Chondroitin sulfate proteoglycan 4 OS=Rattus norvegicus OX=10116 GN=Cspg4 PE=1 SV=2	22.7	251.91	1486300	1761800	2514300	1346000	1204300	1159300	1571900	1272700	1610700	2606800	1721700	1610000	1769400	1895300	1926700	1400900
1299	Q00715	Q00715	Histone H2B type 1		sp|Q00715|H2B1_RAT Histone H2B type 1 OS=Rattus norvegicus OX=10116 PE=1 SV=2	45.6	13.99	29152000	28583000	30706000	26473000	28202000	27659000	26276000	26613000	32255000	39667000	32325000	33747000	35868000	39920000	35490000	31767000
1300	Q00729	Q00729	Histone H2B type 1-A	Hist1h2ba	sp|Q00729|H2B1A_RAT Histone H2B type 1-A OS=Rattus norvegicus OX=10116 GN=H2bc1 PE=1 SV=2	35.4	14.224	0	0	0	0	0	0	0	0	0	0	0	0	0	0	0	927.8
1301	Q00960	Q00960	Glutamate receptor ionotropic, NMDA 2B	Grin2b	sp|Q00960|NMDE2_RAT Glutamate receptor ionotropic, NMDA 2B OS=Rattus norvegicus OX=10116 GN=Grin2b PE=1 SV=1	0.5	166.07	0	0	0	0	0	0	0	0	0	0	0	0	0	0	0	2810000
1302	Q00972	Q00972	[3-methyl-2-oxobutanoate dehydrogenase [lipoamide]] kinase, mitochondrial	Bckdk	sp|Q00972|BCKD_RAT [3-methyl-2-oxobutanoate dehydrogenase [lipoamide]] kinase, mitochondrial OS=Rattus norvegicus OX=10116 GN=Bckdk PE=1 SV=2	33.3	46.474	668310	336670	0	475740	269700	392150	421760	604870	558460	346080	347880	461730	331980	312650	437820	474720
1303	Q01062	Q01062	cGMP-dependent 3,5-cyclic phosphodiesterase	Pde2a	sp|Q01062|PDE2A_RAT cGMP-dependent 3,5-cyclic phosphodiesterase OS=Rattus norvegicus OX=10116 GN=Pde2a PE=1 SV=2	10.6	104.66	166960	165400	451470	95991	111200	131900	122940	197070	112530	215730	211110	122670	169230	129150	130670	114030
1304	Q01129	Q01129	Decorin	Dcn	sp|Q01129|PGS2_RAT Decorin OS=Rattus norvegicus OX=10116 GN=Dcn PE=1 SV=1	33.9	39.805	1880000	2377100	1638600	1984100	1846000	1863500	2776700	2495900	1825000	2677500	3137900	2579400	2836800	2805900	3155700	2086300
1305	Q01177;CON__P06868	Q01177	Plasminogen;Plasmin heavy chain A;Activation peptide;Angiostatin;Plasmin heavy chain A, short form;Plasmin light chain B	Plg	sp|Q01177|PLMN_RAT Plasminogen OS=Rattus norvegicus OX=10116 GN=Plg PE=2 SV=2	38.9	90.535	1525600	2296900	2525900	1336000	1349500	1639600	1759500	1263100	2032000	2287800	1650700	1182100	1505900	2026200	1457300	1541500
1306	Q01205	Q01205	Dihydrolipoyllysine-residue succinyltransferase component of 2-oxoglutarate dehydrogenase complex, mitochondrial	Dlst	sp|Q01205|ODO2_RAT Dihydrolipoyllysine-residue succinyltransferase component of 2-oxoglutarate dehydrogenase complex, mitochondrial OS=Rattus norvegicus OX=10116 GN=Dlst PE=1 SV=2	33.9	48.925	15110000	14458000	20926000	14368000	16737000	15342000	14957000	16304000	16009000	20226000	17259000	17868000	13522000	14233000	13965000	16864000
1307	Q01728;Q01728-2;Q01728-3;Q01728-6;Q01728-4;Q01728-5;P70549	Q01728;Q01728-2;Q01728-3;Q01728-6;Q01728-4;Q01728-5	Sodium/calcium exchanger 1	Slc8a1	sp|Q01728|NAC1_RAT Sodium/calcium exchanger 1 OS=Rattus norvegicus OX=10116 GN=Slc8a1 PE=1 SV=3;sp|Q01728-2|NAC1_RAT Isoform 2 of Sodium/calcium exchanger 1 OS=Rattus norvegicus OX=10116 GN=Slc8a1;sp|Q01728-3|NAC1_RAT Isoform 3 of Sodium/calcium exchanger	19.2	108.18	35672	51547	99697	31902	0	39458	0	72119	102790	177690	68205	69738	93812	98403	113230	49575
1308	Q01728-7	Q01728-7	Sodium/calcium exchanger 1	Slc8a1	sp|Q01728-7|NAC1_RAT Isoform 7 of Sodium/calcium exchanger 1 OS=Rattus norvegicus OX=10116 GN=Slc8a1	18.7	108.12	1224900	1295500	1005500	1229200	1305500	1028300	1315300	910910	1719900	1552600	1440300	1601700	1547100	1742500	1621200	1470500
1309	Q01986	Q01986	Dual specificity mitogen-activated protein kinase kinase 1	Map2k1	sp|Q01986|MP2K1_RAT Dual specificity mitogen-activated protein kinase kinase 1 OS=Rattus norvegicus OX=10116 GN=Map2k1 PE=1 SV=2	26.2	43.465	235680	390450	659500	334230	120280	200190	314350	328610	226690	643250	242390	171380	213250	427570	325720	177360
1310	Q01992	Q01992	Mitochondrial intermediate peptidase	Mipep	sp|Q01992|MIPEP_RAT Mitochondrial intermediate peptidase OS=Rattus norvegicus OX=10116 GN=Mipep PE=1 SV=1	20.4	80.673	598000	806650	470010	698760	564950	783130	712910	723980	758130	858710	957390	761580	826060	896230	787900	841240
1311	Q02253	Q02253	Methylmalonate-semialdehyde dehydrogenase [acylating], mitochondrial	Aldh6a1	sp|Q02253|MMSA_RAT Methylmalonate-semialdehyde dehydrogenase [acylating], mitochondrial OS=Rattus norvegicus OX=10116 GN=Aldh6a1 PE=1 SV=1	79.8	57.807	27501000	33411000	23399000	27068000	26203000	24271000	28271000	25608000	32227000	23749000	26497000	22677000	23157000	27540000	22993000	24934000
1312	Q02589	Q02589	[Protein ADP-ribosylarginine] hydrolase	Adprh	sp|Q02589|ADPRH_RAT [Protein ADP-ribosylarginine] hydrolase OS=Rattus norvegicus OX=10116 GN=Adprh PE=1 SV=2	21	39.961	171450	110600	153720	161780	238500	172670	128870	139150	175140	0	111750	125300	103140	101440	141890	0
1313	Q02759	Q02759	Arachidonate 15-lipoxygenase	Alox15	sp|Q02759|LOX15_RAT Polyunsaturated fatty acid lipoxygenase ALOX15 OS=Rattus norvegicus OX=10116 GN=Alox15 PE=1 SV=3	54.8	75.377	6666200	4671400	6237300	4140000	3966400	3809100	3839900	4354200	2690300	4415000	7558500	4780400	5281200	6532600	3747800	4462400
[truncated: 1,459 more rows]

## Sheet: Upregulated
Significantly upregulated proteins
T: Gene names	T: Protein IDs	T: Majority protein IDs	T: Protein names	T: UniProt names	C: KEGG	C: KEGG name	C: Reactome	N: Sequence coverage [%]	N: Mol. weight [kDa]	N: -Log Student's T-test p-value KO_WT	N: Student's T-test Difference KO_WT	N: Student's T-test Test statistic KO_WT
Habp4	A1L1K8	A1L1K8		A1L1K8_RAT			REACT_288006	23.6	45.826	1.94575	1.1261	2.91372
[truncated: 47 more rows]

## Sheet: Downregulated
Significantly downregulated proteins
[truncated: 56 more rows]
